# Supplementary material
Source: PubMed Central journal article supplement (PMC3338864)
Supplement: NIHMS364577-supplement-1.pdf [file NIHMS364577-supplement-1.pdf]

# Genome-wide meta-analysis identifies 56 bone mineral density loci and reveals 14 loci associated with risk of fracture

Karol Estrada\*, Unnur Styrkarsdottir\*, Evangelos Evangelou\*, Yi-Hsiang Hsu\*, Emma L Duncan\*, Evangelia E Ntzani\*, Ling Oei\*, Omar M E Albagha, Najaf Amin, John P Kemp, Daniel L Koller, Guo Li, Ching-Ti Liu, Ryan L Minster, Alireza Moayyeri, Liesbeth Vandenput, Dana Willner, Su-Mei Xiao, Laura M Yerges-Armstrong, Hou-Feng Zheng, Nerea Alonso, Joel Eriksson, Candace M Kammerer, Stephen K Kaptoge, Paul J Leo, Gudmar Thorleifsson, Scott G Wilson, James F Wilson, Ville Aalto, Markku Alen, Aaron K Aragaki, Thor Aspelund, Jacqueline R Center, Zoe Dailiana, David J Duggan, Melissa Garcia, Natàlia Garcia-Giralt, Sylvie Giroux, Göran Hallmans, Lynne J Hocking, Lise Bjerre Husted, Karen A Jameson, Rita Khusainova, Ghi Su Kim, Charles Kooperberg, Theodora Koromila, Marcin Kruk, Marika Laaksonen, Andrea Z Lacroix, Seung Hun Lee, Ping C Leung, Joshua R Lewis, Laura Masi, Simona Mencej-Bedrac, Tuan V Nguyen, Xavier Nogues, Millan S Patel, Janez Prezelj, Lynda M Rose, Serena Scollen, Kristin Siggeirsdottir, Albert V Smith, Olle Svensson, Stella Trompet, Olivia Trummer, Natasja M van Schoor, Jean Woo, Kun Zhu, Susana Balcells, Maria Luisa Brandi, Brendan M Buckley, Sulin Cheng, Claus Christiansen, Cyrus Cooper, George Dedoussis, Ian Ford, Morten Frost, David Goltzman, Jesús González-Macías, Mika Kähönen, Magnus Karlsson, Elza Khusnutdinova, Jung-Min Koh, Panagoula Kollia, Bente Lomholt Langdahl, William D Leslie, Paul Lips, Östen Ljunggren, Roman S Lorenc, Janja Marc, Dan Mellström, Barbara Obermayer-Pietsch, José M Olmos, Ulrika Pettersson-Kymmer, David M Reid, José A Riancho, Paul M Ridker, François Rousseau, P Eline Slagboom, Nelson LS Tang, Roser Urreiziti, Wim Van Hul, Jorma Viikari, María T Zarrabeitia, Yurii S Aulchenko, Martha Castano-Betancourt, Elin Grundberg, Lizbeth Herrera, Thorvaldur Ingvarsson, Hrefna Johannsdottir, Tony Kwan, Rui Li, Robert Luben, Carolina Medina-Gómez, Stefan Th Palsson, Sjur Reppe, Jerome I Rotter, Gunnar Sigurdsson, Joyce B J van Meurs, Dominique Verlaan, Frances MK Williams, Andrew R Wood, Yanhua Zhou, Kaare M Gautvik, Tomi Pastinen, Soumya Raychaudhuri, Jane A Cauley, Daniel I Chasman, Graeme R Clark, Steven R Cummings, Patrick Danoy, Elaine M Dennison, Richard Eastell, John A Eisman, Vilmondur Gudnason, Albert Hofman, Rebecca D Jackson, Graeme Jones, J Wouter Jukema, Kay-Tee Khaw, Terho Lehtimäki, Yongmei Liu, Mattias Lorentzon, Eugene McCloskey, Braxton D Mitchell, Kannabiran Nandakumar, Geoffrey C Nicholson, Ben A Oostra, Munro Peacock, Huibert A P Pols, Richard L Prince, Olli Raitakari, Ian R Reid, John Robbins, Philip N Sambrook, Pak Chung Sham, Alan R Shuldiner, Frances A Tylavsky, Cornelia M van Duijn, Nick J Wareham, L Adrienne Cupples, Michael J Econs, David M Evans, Tamara B Harris, Annie W C Kung, Bruce M Psaty, Jonathan Reeve, Timothy D Spector, Elizabeth A Streeten, M Carola Zillikens, Unnur Thorsteinsdottir<sup>#</sup>, Claes Ohlsson<sup>#</sup>, David Karasik<sup>#</sup>, J Brent Richards<sup>#</sup>, Matthew A Brown<sup>#</sup>, Kari Stefansson<sup>#</sup>, André G Uitterlinden<sup>#</sup>, Stuart H Ralston<sup>#</sup>, John P A Ioannidis<sup>#</sup>, Douglas P Kiel<sup>#</sup>, Fernando Rivadeneira<sup>#</sup>

\* These authors contributed equally to this work.

<sup>#</sup>These authors jointly directed this work.

# **SUPPLEMENTARY INFORMATION**

## **CONTENTS**

|                                                   |     |
|---------------------------------------------------|-----|
| - SUPPLEMENTARY TABLES 1-20                       | 3   |
| - SUPPLEMENTARY FIGURES 1-10                      | 64  |
| - SUPPLEMENTARY NOTE                              | 112 |
| 1. DE-NOVO GENOTYPING FOLLOW-UP (STAGE 2)         | 112 |
| 2. ADDITIONAL ANALYSES                            | 113 |
| 2.1. Secondary signals                            | 113 |
| 2.2. Gene x Gene interaction                      | 114 |
| 2.3. Fine Mapping using 1000 Genomes Project data | 114 |
| 2.4. Gene expression                              | 115 |
| 2.5. Literature-based annotation with GRAIL       | 116 |
| 2.6. Allele Risk Modeling                         | 116 |
| 3. URLS                                           | 117 |
| 4. SUPPLEMENTARY REFERENCES                       | 118 |
| 5. COHORT-SPECIFIC CONTRIBUTIONS                  | 120 |
| 6. FULL ACKNOWLEDGMENTS                           | 123 |

## Supplementary Tables

|                               |                                                                                                                                                                                                                      |
|-------------------------------|----------------------------------------------------------------------------------------------------------------------------------------------------------------------------------------------------------------------|
| <b>Supplementary Table 1.</b> | Stage 1 meta-analyses results for markers that were selected for replication in stage 2.                                                                                                                             |
| <b>Supplementary Table 2.</b> | Secondary signals in BMD loci after conditional analysis                                                                                                                                                             |
| <b>Supplementary Table 3.</b> | Gene x Gene interaction results                                                                                                                                                                                      |
| <b>Supplementary Table 4.</b> | Sex-combined meta-analysis results for:<br><br>A. New loci associated with BMD at GWS level.<br>B. Known loci associated with BMD at GWS level.<br>C. Loci not reaching GWS association with BMD after replication   |
| <b>Supplementary Table 5.</b> | Sex-stratified meta-analysis results for:<br><br>A. New loci associated with BMD at GWS level.<br>B. Known loci associated with BMD at GWS level.<br>C. Loci not reaching GWS association with BMD after replication |
| <b>Supplementary Table 6.</b> | Association of BMD loci with Any low-trauma fracture across stage categories                                                                                                                                         |
| <b>Supplementary Table 7.</b> | Proportion of Fracture Risk explained by BMD                                                                                                                                                                         |
| <b>Supplementary Table 8.</b> | Results of meta-analysis for different types of fractures                                                                                                                                                            |
| <b>Supplementary Table 9.</b> | Weights for Allele Score Modeling                                                                                                                                                                                    |

|                                    |                                                                                                                                                                                                                                                                                                           |
|------------------------------------|-----------------------------------------------------------------------------------------------------------------------------------------------------------------------------------------------------------------------------------------------------------------------------------------------------------|
| <b>Supplementary Table 10.</b>     | Associated top SNPs from SNP-FN BMD association analysis using 1000G imputed genotypes (Pooled analysis)                                                                                                                                                                                                  |
| <b>Supplementary Table 11.</b>     | Associated top SNPs from SNP-LS BMD association analysis using 1000G imputed genotypes (Pooled analysis)                                                                                                                                                                                                  |
| <b>Supplementary Table 12.</b>     | Predicted functional SNPs (imputed from 1000 Genomics Project) in LD with targeted SNP in each locus                                                                                                                                                                                                      |
| <b>Supplementary Table 13.</b>     | Correlation between BMD at femoral neck and lumbar spine and gene expression in trans-iliacal bone biopsies                                                                                                                                                                                               |
| <b>Supplementary Table 14.</b>     | Probable BMD-SNP cis eQTLs; Significant correlation between BMD associated SNP genotypes and gene expression                                                                                                                                                                                              |
| <b>Supplementary Table 15.</b>     | Non-BMD SNP cis eQTLs; Significant correlation between non-associated SNP genotypes and gene expression                                                                                                                                                                                                   |
| <b>Supplementary Table 16.</b>     | Candidate Genes selected by GRAIL                                                                                                                                                                                                                                                                         |
| <b>Supplementary Table 17.</b>     | Functional and biological evidence for genes underlying GWAS loci                                                                                                                                                                                                                                         |
| <b>Supplementary Tables 18-20.</b> | Description of studies (Stage 1, Stage 2-In-silico replication and Stage 2 de-novo genotyping replication with: <ul style="list-style-type: none"> <li>A. Study design</li> <li>B. Study descriptive</li> <li>C. Study descriptive fracture information</li> <li>D. Genotyping quality control</li> </ul> |

**Supplementary Table 1 Stage 1 meta-analyses results for markers that were selected for replication in stage 2.**

| SNP        | Locus    | Position  | Closest Gene    | A1 | A2 | Freq1 | Analysis         | FN-BMD |                 | LS-BMD |                 | Known Locus/signal |
|------------|----------|-----------|-----------------|----|----|-------|------------------|--------|-----------------|--------|-----------------|--------------------|
|            |          |           |                 |    |    |       |                  | Beta   | P               | Beta   | P               |                    |
| rs2120461  | 1p36.23  | 8370309   | <i>RERE</i>     | t  | c  | 0.68  | Both sexes       | 0.048  | <b>3.91E-08</b> | 0.035  | 1.44E-04        | no                 |
| rs7521902  | 1p36.12  | 22363311  | <i>WNT4</i>     | a  | c  | 0.31  | Secondary signal | -0.051 | 8.78E-08        | -0.050 | 1.25E-06        | yes                |
| rs6426749  | 1p36.12  | 22584060  | <i>ZBTB40</i>   | c  | g  | 0.17  | Both sexes       | 0.108  | <b>1.35E-23</b> | 0.105  | <b>2.35E-20</b> | yes                |
| rs12137389 | 1p34.1   | 45710973  | <i>TESK2</i>    | t  | c  | 0.02  | Both sexes       | -0.127 | 3.05E-06        | -0.052 | 7.38E-02        | no                 |
| rs17482952 | 1p31.3   | 68411973  | <i>WLS</i>      | a  | g  | 0.93  | Secondary signal | 0.076  | 2.32E-07        | 0.063  | 7.19E-05        | yes/no             |
| rs12407028 | 1p31.3   | 68420304  | <i>WLS</i>      | t  | c  | 0.61  | Both sexes       | 0.048  | <b>1.47E-08</b> | 0.081  | <b>6.86E-20</b> | yes                |
| rs11809524 | 1p21.1   | 103232125 | <i>COL11A1</i>  | t  | c  | 0.85  | Both sexes       | 0.055  | 1.37E-06        | 0.047  | 1.06E-04        | no                 |
| rs479336   | 1q24.3   | 170466196 | <i>DNM3</i>     | t  | g  | 0.74  | Both sexes       | -0.050 | 1.06E-07        | -0.024 | 1.34E-02        | no                 |
| rs12120297 | 1q41     | 221617907 | <i>SUSD4</i>    | t  | c  | 0.85  | Both sexes       | 0.042  | 7.95E-04        | 0.065  | 3.05E-06        | no                 |
| rs13413210 | 2p23.2   | 29426149  | <i>ALK</i>      | a  | c  | 0.91  | Males            | -0.059 | 3.02E-02        | -0.130 | 2.65E-06        | no                 |
| rs7584262  | 2p21     | 42104053  | <i>PKDCC</i>    | t  | c  | 0.23  | Both sexes       | 0.053  | 1.44E-07        | 0.016  | 1.27E-01        | no                 |
| rs4233949  | 2p16.2   | 54513211  | <i>SPTBN1</i>   | c  | g  | 0.38  | Both sexes       | 0.032  | 1.49E-04        | 0.062  | <b>5.01E-12</b> | yes                |
| rs730402   | 2p16.1   | 59948210  | <i>BCL11A</i>   | a  | g  | 0.45  | Males            | 0.070  | 2.62E-06        | 0.037  | 1.45E-02        | no                 |
| rs17040773 | 2q13     | 112216506 | <i>ANAPC1</i>   | a  | c  | 0.77  | Both sexes       | 0.045  | 4.26E-06        | 0.005  | 6.14E-01        | no                 |
| rs1878526  | 2q14.2   | 118755068 | <i>INSIG2</i>   | a  | g  | 0.22  | Females          | 0.013  | 2.77E-01        | 0.061  | 6.41E-07        | no                 |
| rs1346004  | 2q24.3   | 166309292 | <i>GALNT3</i>   | a  | g  | 0.49  | Both sexes       | -0.052 | <b>1.79E-10</b> | -0.049 | <b>1.29E-08</b> | yes                |
| rs11675051 | 2q32.2   | 191154675 | <i>NAB1</i>     | a  | g  | 0.32  | Females          | 0.049  | 1.47E-06        | 0.019  | 8.15E-02        | no                 |
| rs12995369 | 2q33.1   | 202535225 | <i>ALS2CR7</i>  | a  | g  | 0.55  | Both sexes       | 0.052  | 1.94E-07        | 0.031  | 4.71E-03        | no                 |
| rs6436440  | 2q36.1   | 224413150 | <i>AP1S3</i>    | a  | g  | 0.47  | Females          | 0.046  | 1.17E-06        | 0.033  | 1.10E-03        | no                 |
| rs2291296  | 3p24.2   | 25400886  | <i>RARB</i>     | a  | g  | 0.17  | Females          | -0.007 | 5.88E-01        | -0.061 | 3.76E-06        | no                 |
| rs7427438  | 3p24.1   | 29369729  | <i>RBMS3</i>    | a  | c  | 0.33  | Females          | -0.047 | 2.29E-06        | -0.017 | 1.16E-01        | no                 |
| rs430727   | 3p22.1   | 41103568  | <i>CTNNB1</i>   | t  | c  | 0.47  | Both sexes       | -0.074 | <b>9.73E-17</b> | -0.056 | <b>2.87E-09</b> | yes                |
| rs1026364  | 3q13.2   | 114852700 | <i>KIAA2018</i> | t  | g  | 0.36  | Both sexes       | 0.041  | 2.01E-06        | 0.019  | 4.29E-02        | no                 |
| rs344081   | 3q25.31  | 158038678 | <i>LEKR1</i>    | t  | c  | 0.87  | Males            | 0.112  | 6.83E-07        | 0.083  | 2.87E-04        | no                 |
| rs3755955  | 4p16.3   | 984414    | <i>IDUA</i>     | a  | g  | 0.16  | Both sexes       | -0.061 | 3.90E-07        | -0.068 | 1.35E-07        | no                 |
| rs6532023  | 4q22.1   | 88992873  | <i>MEPE</i>     | t  | g  | 0.34  | Both sexes       | 0.051  | <b>2.55E-09</b> | 0.061  | <b>1.72E-11</b> | yes                |
| rs1366594  | 5q14.3   | 88411817  | <i>MEF2C</i>    | a  | c  | 0.53  | Both sexes       | 0.092  | <b>7.38E-29</b> | 0.019  | 2.90E-02        | yes                |
| rs4957742  | 5q21.3   | 105200867 | <i>EFNA5</i>    | a  | g  | 0.77  | Both sexes       | -0.044 | 4.74E-06        | -0.028 | 7.56E-03        | no                 |
| rs9466056  | 6p22.3   | 21492592  | <i>CDKAL1</i>   | a  | g  | 0.38  | Both sexes       | -0.048 | <b>1.80E-08</b> | -0.036 | 6.53E-05        | no                 |
| rs11755164 | 6p21.1   | 44747162  | <i>SUPT3H</i>   | t  | c  | 0.40  | Both sexes       | -0.012 | 2.26E-01        | -0.052 | 3.52E-07        | no                 |
| rs13204965 | 6q22.32  | 127208765 | <i>RSPO3</i>    | a  | c  | 0.76  | Females          | 0.069  | 2.90E-07        | 0.049  | 8.23E-04        | yes                |
| rs4869742  | 6q25.1   | 151949441 | <i>C6orf97</i>  | t  | c  | 0.32  | Both sexes       | -0.068 | <b>3.61E-14</b> | -0.087 | <b>3.27E-20</b> | yes                |
| rs7751941  | 6q25.1   | 151988351 | <i>C6orf97</i>  | a  | g  | 0.21  | Secondary signal | -0.048 | 5.34E-07        | -0.077 | <b>3.97E-14</b> | yes/yes            |
| rs7788807  | 7p22.1_1 | 4734564   | <i>FO XK1</i>   | t  | c  | 0.94  | Females          | 0.043  | 3.34E-02        | 0.098  | 4.11E-06        | no                 |
| rs2008425  | 7p22.1_2 | 5786972   | <i>RNF216</i>   | t  | g  | 0.02  | Females          | -0.127 | 2.00E-03        | -0.194 | 2.97E-06        | no                 |
| rs10226308 | 7p14.1   | 37904947  | <i>TXNDC3</i>   | a  | g  | 0.84  | Secondary signal | -0.029 | 3.81E-03        | -0.063 | <b>3.36E-09</b> | yes/no             |

**Supplementary Table 1 Stage 1 meta-analyses results for markers that were selected for replication in stage 2.**

| SNP        | Locus     | Position  | Closest Gene | A1 | A2 | Freq1 | Analysis         | FN-BMD |                 | LS-BMD |                 | Known Locus/signal |
|------------|-----------|-----------|--------------|----|----|-------|------------------|--------|-----------------|--------|-----------------|--------------------|
|            |           |           |              |    |    |       |                  | Beta   | P               | Beta   | P               |                    |
| rs6959212  | 7p14.1    | 38094851  | STAR3NL      | t  | c  | 0.34  | Both sexes       | -0.030 | 6.36E-04        | -0.077 | <b>6.86E-17</b> | yes                |
| rs2282930  | 7p12.2    | 50722173  | GRB10        | a  | g  | 0.26  | Females          | -0.057 | 5.03E-07        | -0.037 | 2.26E-03        | no                 |
| rs4727338  | 7q21.3    | 95958611  | SLC25A13     | c  | g  | 0.67  | Both sexes       | 0.081  | <b>2.99E-20</b> | 0.074  | <b>1.11E-15</b> | yes                |
| rs13245690 | 7q31.31   | 120572300 | C7orf58      | a  | g  | 0.65  | Secondary signal | 0.032  | 8.57E-05        | 0.052  | <b>1.07E-09</b> | no                 |
| rs3801387  | 7q31.31   | 120762001 | WNT16        | a  | g  | 0.74  | Both sexes       | -0.071 | <b>4.23E-14</b> | -0.083 | <b>1.35E-16</b> | no                 |
| rs7812088  | 7q36.1    | 150550762 | ABCF2        | a  | g  | 0.12  | Both sexes       | 0.061  | 1.22E-06        | 0.055  | 2.93E-05        | no                 |
| rs1670346  | 7q36.3    | 157960022 | PTPRN2       | a  | g  | 0.30  | Both sexes       | -0.042 | 2.81E-06        | -0.020 | 3.49E-02        | no                 |
| rs7017914  | 8q13.3    | 71753757  | XKR9         | a  | g  | 0.49  | Females          | 0.053  | <b>4.70E-08</b> | 0.010  | 3.52E-01        | no                 |
| rs13272568 | 8q21.12   | 79197014  | PKIA         | a  | c  | 0.44  | Both sexes       | -0.039 | 2.13E-06        | -0.014 | 9.80E-02        | no                 |
| rs2062377  | 8q24.12   | 120076601 | TNFRSF11B    | a  | t  | 0.59  | Both sexes       | -0.063 | <b>2.50E-14</b> | -0.081 | <b>2.26E-20</b> | yes                |
| rs4240467  | 9q33.2    | 123350111 | DAB2IP       | c  | g  | 0.32  | Males            | -0.043 | 6.75E-03        | -0.079 | 9.65E-07        | no                 |
| rs7851693  | 9q34.11   | 132468648 | FUBP3        | c  | g  | 0.63  | Both sexes       | 0.047  | <b>3.08E-08</b> | 0.017  | 5.81E-02        | no                 |
| rs3905706  | 10p11.23  | 28519948  | MPP7         | t  | c  | 0.23  | Both sexes       | 0.005  | 6.28E-01        | 0.063  | <b>2.93E-09</b> | no                 |
| rs1373004  | 10q21.1   | 54097831  | MBL2         | t  | g  | 0.12  | Females          | -0.065 | 6.32E-06        | -0.089 | <b>8.87E-09</b> | no                 |
| rs7071206  | 10q22.3_1 | 79071322  | KCNMA1       | t  | c  | 0.76  | Females          | -0.020 | 8.68E-02        | -0.087 | <b>8.34E-13</b> | no                 |
| rs2784767  | 10q22.3_2 | 81884474  | PLAC9        | t  | c  | 0.43  | Females          | 0.052  | 4.80E-06        | 0.036  | 5.09E-03        | no                 |
| rs7084921  | 10q24.2   | 101803792 | CPN1         | t  | c  | 0.40  | Females          | 0.045  | 3.13E-06        | 0.027  | 8.62E-03        | no                 |
| rs11602954 | 11p15.5   | 192856    | BET1L        | a  | g  | 0.23  | Both sexes       | 0.034  | 1.06E-03        | 0.056  | 2.74E-07        | no                 |
| rs7108738  | 11p15.2   | 15666660  | SOX6         | t  | g  | 0.82  | Both sexes       | -0.093 | <b>1.03E-17</b> | -0.047 | 4.51E-05        | yes                |
| rs10835187 | 11p14.1_1 | 27462253  | LIN7C        | t  | c  | 0.54  | Females          | -0.028 | 3.70E-03        | -0.052 | 4.14E-07        | no                 |
| rs163879   | 11p14.1_2 | 30908250  | DCDC5        | t  | c  | 0.66  | Both sexes       | -0.042 | 1.70E-06        | -0.049 | 8.81E-08        | yes                |
| rs7932354  | 11p11.2   | 46678797  | ARHGAP1      | t  | c  | 0.33  | Both sexes       | 0.050  | <b>2.29E-08</b> | 0.041  | 1.23E-05        | yes                |
| rs600231   | 11q13.1   | 65017222  | SCYL1        | a  | g  | 0.69  | Females          | -0.051 | 9.03E-07        | -0.032 | 3.55E-03        | no                 |
| rs3736228  | 11q13.2   | 67957871  | LRP5         | t  | c  | 0.15  | Both sexes       | -0.054 | 1.79E-06        | -0.081 | <b>1.62E-11</b> | yes                |
| rs2887571  | 12p13.33  | 1508432   | ERC1         | a  | g  | 0.76  | Both sexes       | -0.037 | 1.06E-04        | -0.052 | 2.20E-07        | no                 |
| rs11048046 | 12p12.1   | 25496076  | IFLTD1       | a  | g  | 0.08  | Males            | -0.148 | 3.59E-06        | -0.055 | 8.30E-02        | no                 |
| rs7953528  | 12p11.22  | 27908426  | KLHDC5       | a  | t  | 0.18  | Both sexes       | 0.058  | 5.75E-08        | 0.001  | 9.44E-01        | no                 |
| rs12821008 | 12q13.12  | 47760872  | DHH          | t  | c  | 0.40  | Both sexes       | 0.032  | 1.89E-04        | 0.047  | 1.53E-07        | no                 |
| rs2016266  | 12q13.13  | 52014222  | SP7          | a  | g  | 0.69  | Both sexes       | -0.045 | 4.79E-07        | -0.063 | <b>1.53E-11</b> | yes                |
| rs736825   | 12q13.13  | 52703843  | HOXC6        | c  | g  | 0.56  | Secondary signal | 0.036  | 7.65E-06        | 0.054  | <b>2.40E-10</b> | yes/no             |
| rs1053051  | 12q23.3   | 105891355 | C12orf23     | t  | c  | 0.51  | Both sexes       | -0.036 | 1.35E-05        | -0.041 | 2.47E-06        | no                 |
| rs9533090  | 13q14.11  | 41849449  | AKAP11       | t  | c  | 0.48  | Both sexes       | -0.054 | <b>9.84E-11</b> | -0.110 | <b>1.02E-35</b> | yes                |
| rs7326472  | 13q14.11  | 41877951  | AKAP11       | a  | g  | 0.92  | Secondary signal | -0.055 | 2.55E-03        | -0.103 | 9.80E-08        | yes/no             |
| rs1286083  | 14q32.12  | 90512532  | RPS6KA5      | t  | c  | 0.80  | Both sexes       | -0.059 | <b>2.91E-08</b> | -0.074 | <b>1.69E-11</b> | no                 |
| rs11623869 | 14q32.32  | 102953386 | MARK3        | t  | g  | 0.34  | Both sexes       | -0.041 | 1.26E-06        | -0.030 | 7.53E-04        | yes                |
| rs2118784  | 15q21.2   | 49238477  | CYP19A1      | a  | c  | 0.29  | Females          | -0.050 | 1.41E-06        | -0.038 | 5.26E-04        | no                 |

**Supplementary Table 1 Stage 1 meta-analyses results for markers that were selected for replication in stage 2.**

| SNP        | Locus      | Position  | Closest Gene | A1 | A2 | Freq1 | Analysis          | FN-BMD |                 | LS-BMD |                 | Known Locus/signal |
|------------|------------|-----------|--------------|----|----|-------|-------------------|--------|-----------------|--------|-----------------|--------------------|
|            |            |           |              |    |    |       |                   | Beta   | P               | Beta   | P               |                    |
| rs9921222  | 16p13.3_1  | 315783    | AXIN1        | t  | c  | 0.46  | Both sexes        | -0.043 | 2.46E-07        | -0.049 | <b>2.20E-08</b> | no                 |
| rs13336428 | 16p13.3_2  | 1472464   | C16orf38     | a  | g  | 0.44  | Both sexes        | -0.043 | 2.87E-07        | -0.036 | 5.94E-05        | no                 |
| rs4985155  | 16p13.11   | 15036960  | NTAN1        | a  | g  | 0.65  | Both sexes        | -0.031 | 3.53E-04        | -0.045 | 8.71E-07        | no                 |
| rs1564981  | 16q12.1    | 49543809  | CYLD         | a  | g  | 0.50  | Secondary signal  | -0.025 | 1.05E-03        | -0.045 | 6.24E-08        | no                 |
| rs1566045  | 16q12.1    | 49579304  | SALL1        | t  | c  | 0.80  | Both sexes        | -0.074 | <b>4.95E-12</b> | -0.030 | 7.83E-03        | no                 |
| rs10048146 | 16q24.1    | 85268161  | FOXL1        | a  | g  | 0.80  | Both sexes        | 0.056  | 1.28E-07        | 0.061  | <b>2.95E-08</b> | yes                |
| rs4790881  | 17p13.3    | 2015682   | SMG6         | a  | c  | 0.67  | Both sexes        | 0.051  | <b>1.66E-08</b> | 0.032  | 6.04E-04        | no                 |
| rs4792909  | 17q21.31_1 | 39154350  | SOST         | t  | g  | 0.37  | Secondary signal  | 0.035  | 1.85E-05        | 0.044  | 5.14E-07        | yes/yes            |
| rs227584   | 17q21.31_1 | 39581073  | C17orf53     | a  | c  | 0.67  | Both sexes        | -0.060 | <b>3.44E-11</b> | -0.048 | 4.77E-07        | yes                |
| rs1864325  | 17q21.31_2 | 41333623  | MAPT         | t  | c  | 0.22  | Both sexes        | -0.040 | 7.79E-05        | -0.057 | 1.11E-07        | yes                |
| rs7226305  | 17q22      | 49464490  | KIF2B        | a  | c  | 0.82  | Both sexes        | -0.017 | 1.29E-01        | -0.058 | 1.33E-06        | no                 |
| rs7217932  | 17q24.3    | 67460611  | SOX9         | a  | g  | 0.46  | Both sexes        | 0.045  | <b>3.65E-08</b> | 0.009  | 3.12E-01        | no                 |
| rs4796995  | 18p11.21   | 13698574  | C18orf19     | a  | g  | 0.61  | Both sexes        | 0.040  | 3.18E-06        | 0.031  | 5.22E-04        | no                 |
| rs884205   | 18q21.33   | 58205837  | TNFRSF11A    | a  | c  | 0.25  | Both sexes        | -0.042 | 3.87E-05        | -0.065 | <b>4.85E-09</b> | yes                |
| rs7257450  | 19p13.11   | 17349607  | PLVAP        | a  | g  | 0.76  | Females           | 0.014  | 2.78E-01        | 0.065  | 4.79E-06        | no                 |
| rs10416218 | 19q13.11   | 38290967  | GPATCH1      | t  | c  | 0.72  | Both sexes        | -0.042 | 5.73E-06        | -0.056 | <b>9.19E-09</b> | no                 |
| rs3790160  | 20p12.2    | 10587988  | JAG1         | t  | c  | 0.50  | Both sexes        | 0.043  | 1.32E-07        | 0.057  | <b>5.36E-11</b> | yes                |
| rs4817775  | 21q22.12   | 36406932  | CBR3         | a  | c  | 0.58  | Both sexes        | 0.023  | 6.24E-03        | 0.042  | 1.49E-06        | no                 |
| rs4820539  | 22q11.23   | 21807970  | RTDR1        | a  | g  | 0.44  | Both sexes        | 0.038  | 4.86E-06        | 0.025  | 3.65E-03        | no                 |
| rs5934507  | Xp22.31    | 8877206   | FAM9B        | a  | g  | 0.73  | ChrX - men        | -0.031 | 1.19E-02        | -0.057 | 5.66E-06        | no                 |
| rs5926033  | Xp22.11    | 22594282  | DDX53        | t  | c  | 0.71  | ChrX - both sexes | 0.037  | 4.13E-06        | 0.014  | 9.96E-02        | no                 |
| rs5952638  | Xp11.3     | 44579849  | DUSP21       | a  | t  | 0.93  | ChrX - both sexes | 0.056  | 3.03E-04        | 0.069  | 2.29E-05        | no                 |
| rs4492531  | Xq13.3     | 74948856  | MAGEE2       | a  | g  | 0.55  | ChrX - both sexes | -0.066 | 1.98E-03        | -0.094 | 2.40E-05        | no                 |
| rs964181   | Xq28       | 150792732 | MAGEA4       | t  | c  | 0.41  | ChrX - both sexes | 0.036  | 4.72E-06        | 0.028  | 5.22E-04        | no                 |

The effect estimates (Beta) are expressed as standardized values per copy of the SNP allele (A1). Results are shown for the analysis from which the marker was selected for replication, shown in the Analysis column. Freq1 denotes allelic frequency of SNP allele A1, FN-BMD is BMD at the femoral neck and LS-BMD is BMD at lumbar spine. In the pooled analysis of both sexes were 32,961 subjects, 31,900 in the secondary signal analysis, 22,990 in the female only analysis and 9,9980 in males only. Subjects analysed for the X chromosome were 31,801. Whether a locus has previously been reported to associate with BMD, or a secondary signal at a known locus, is shown. Position is given according to NCBIbuild36.

Supplementary Table 2 Secondary signals in BMD loci after conditional analysis

| Second signal<br>SNP <sup>a</sup> | Locus    | Closest<br>Gene/Candidate | MAF  | Conditioned<br>SNP | Distance<br>(bp) <sup>b</sup> | Genetic<br>Distance<br>(cM) | HapMap <sup>c</sup><br>r <sup>2</sup> | A1 <sup>d</sup> | Second signal P value<br>after conditioning<br>(Discovery n=31,900) |          |       |                 | Second signal P value after replication<br>(Discovery + Replication n=56,123) |                 |       |                 |
|-----------------------------------|----------|---------------------------|------|--------------------|-------------------------------|-----------------------------|---------------------------------------|-----------------|---------------------------------------------------------------------|----------|-------|-----------------|-------------------------------------------------------------------------------|-----------------|-------|-----------------|
|                                   |          |                           |      |                    |                               |                             |                                       |                 | FNBMD                                                               |          | LSBMD |                 | FNBMD                                                                         |                 | LSBMD |                 |
|                                   |          |                           |      |                    |                               |                             |                                       |                 | Beta                                                                | P        | Beta  | P               | Beta                                                                          | P               | Beta  | P               |
| rs17482952                        | 1p31.3   | WLS                       | 0.07 | rs12407028         | 8,331                         | 0.01                        | 0.062                                 | a               | 0.08                                                                | 2.32E-07 | 0.06  | 7.19E-05        | 0.08                                                                          | <b>1.31E-11</b> | 0.07  | <b>1.69E-08</b> |
| rs7521902                         | 1p36.12  | WNT4                      | 0.19 | rs6426749          | 220,749                       | 0.42                        | 0.003                                 | a               | -0.05                                                               | 8.78E-08 | -0.05 | 1.25E-06        | -0.04                                                                         | <b>2.85E-09</b> | -0.05 | <b>9.66E-11</b> |
| rs7751941                         | 6q25.1   | C6orf97/ESR1              | 0.23 | rs4869742          | 38,910                        | 0.11                        | 0.008                                 | a               | -0.05                                                               | 5.34E-07 | -0.08 | <b>3.97E-14</b> | -0.04                                                                         | <b>1.59E-09</b> | -0.08 | <b>1.99E-24</b> |
| rs10226308                        | 7p14.1   | TXNDC3/SFRP4              | 0.19 | rs6959212          | 189,904                       | 0.25                        | 0.004                                 | a               | -0.03                                                               | 3.81E-03 | -0.06 | <b>3.36E-09</b> | -0.02                                                                         | 1.53E-02        | -0.06 | <b>6.40E-13</b> |
| rs13245690                        | 7q31.31  | C7orf58                   | 0.38 | rs3801387          | 189,701                       | 0.15                        | 0.028                                 | a               | 0.03                                                                | 8.57E-05 | 0.05  | <b>1.07E-09</b> | 0.02                                                                          | 8.20E-04        | 0.05  | <b>1.65E-11</b> |
| rs736825                          | 12q13.13 | HOXC6                     | 0.35 | rs2016266          | 689,621                       | NA                          | NA                                    | c               | 0.04                                                                | 7.65E-06 | 0.05  | <b>2.40E-10</b> | 0.04                                                                          | <b>1.06E-09</b> | 0.05  | <b>7.68E-16</b> |
| rs7326472                         | 13q14.11 | AKAP11/TNFSF11            | 0.04 | rs9533090          | 28,502                        | 0.01                        | 0.033                                 | a               | -0.05                                                               | 2.55E-03 | -0.10 | 9.80E-08        | -0.05                                                                         | 5.07E-04        | -0.07 | 2.61E-07        |
| rs1564981                         | 16q12.1  | CYLD                      | 0.47 | rs1566045          | 35,495                        | 0.10                        | 0.009                                 | a               | -0.03                                                               | 1.05E-03 | -0.04 | 6.24E-08        | -0.02                                                                         | 4.38E-05        | -0.04 | <b>1.95E-10</b> |
| rs4792909                         | 17q21.31 | SOST                      | 0.35 | rs227584           | 426,723                       | 0.25                        | 0.001                                 | t               | 0.04                                                                | 1.85E-05 | 0.04  | 5.14E-07        | 0.04                                                                          | <b>1.95E-11</b> | 0.04  | <b>9.43E-10</b> |

a Index marker representing the second signal in the originally associated locus after conditioning for the most significant SNP in the same region. b Distance of conditioned SNP from the index SNP. c HapMap CEU phase II release 22. d Coded allele of the second signal for which the Beta estimate is specified.



**Supplementary Table 3 Gene x Gene interaction results.**

| TRAIT | SNP1       | GENE1          | SNP2       | GENE2         | Beta_interaction | se_interaction | I2 | P_interaction |
|-------|------------|----------------|------------|---------------|------------------|----------------|----|---------------|
| FNBM  | rs4869742  | <i>C6orf97</i> | rs12821008 | <i>DHH</i>    | 0.04             | 0.009          | 0  | 4.90E-05      |
| FNBM  | rs11809524 | <i>COL11A1</i> | rs9533090  | <i>AKAP11</i> | 0.04             | 0.011          | 20 | 2.18E-04      |
| LSBM  | rs9466056  | <i>CDKAL1</i>  | rs2016266  | <i>SP7</i>    | 0.02             | 0.007          | 8  | 2.23E-04      |
| LSBM  | rs11675051 | <i>NAB1</i>    | rs2282930  | <i>GRB10</i>  | -0.03            | 0.009          | 0  | 5.98E-04      |
| LSBM  | rs9921222  | <i>AXIN1</i>   | rs1864325  | <i>MAPT</i>   | 0.03             | 0.009          | 37 | 7.58E-04      |
| FNBM  | rs11675051 | <i>NAB1</i>    | rs3755955  | <i>IDUA</i>   | 0.04             | 0.012          | 0  | 1.20E-03      |
| FNBM  | rs2120461  | <i>RERE</i>    | rs2282930  | <i>GRB10</i>  | 0.03             | 0.010          | 24 | 1.25E-03      |
| LSBM  | rs7953528  | <i>KLHDC5</i>  | rs7257450  | <i>PLVAP</i>  | 0.02             | 0.007          | 16 | 1.34E-03      |
| LSBM  | rs7953528  | <i>KLHDC5</i>  | rs6532023  | <i>MEPE</i>   | 0.02             | 0.007          | 0  | 1.34E-03      |

Nominally significant ( $P < 1.5 \times 10^{-3}$ ) gene x gene interaction results for pair-wise tests of lead SNPs at 82 BMD loci with  $P < 5 \times 10^{-6}$  in Stage 1. Adjusting for 3321 tests, the P-value for significance is  $1.5 \times 10^{-5}$ .

Supplementary Table 4A Sex-combined meta-analysis results across stages for new loci associated with BMD at GWS level.

| SNP        | Locus     | Closest Gene    | A1a | A2 | Freq1 | FNBMD                     |                 |       |                           |    |      | LSBMD                                  |                 |                  |                           |       |                           |    |       |                  |                                        |      |
|------------|-----------|-----------------|-----|----|-------|---------------------------|-----------------|-------|---------------------------|----|------|----------------------------------------|-----------------|------------------|---------------------------|-------|---------------------------|----|-------|------------------|----------------------------------------|------|
|            |           |                 |     |    |       | STAGE 1<br>(Up to 32,961) |                 |       | STAGE 2<br>(Up to 50,933) |    |      | STAGE 1 +<br>STAGE 2<br>(Up to 83,894) |                 |                  | STAGE 1<br>(Up to 31,800) |       | STAGE 2<br>(Up to 45,708) |    |       |                  | STAGE 1 +<br>STAGE 2<br>(Up to 77,508) |      |
|            |           |                 |     |    |       | Beta                      | P               | I2    | Q <sub>het</sub>          | P  | Beta | P                                      | I2              | Q <sub>het</sub> | Beta                      | P     | Beta                      | P  | I2    | Q <sub>het</sub> | P                                      | Beta |
| rs479336   | 1q24.3    | <i>DNM3</i>     | t   | g  | 0.74  | -0.05                     | 1.06E-07        | -0.04 | <b>1.30E-08</b>           | 0  | 0.94 | -0.04                                  | <b>8.51E-15</b> | -0.02            | 0.01                      | -0.03 | 4.97E-04                  | 0  | 0.84  | -0.03            | 2.14E-05                               |      |
| rs7584262  | 2p21      | <i>PKDCC</i>    | t   | c  | 0.23  | 0.05                      | 1.44E-07        | 0.03  | 3.37E-04                  | 0  | 0.75 | 0.04                                   | <b>1.27E-09</b> | 0.02             | 0.13                      | 0.01  | 0.28                      | 0  | 0.93  | 0.01             | 0.07                                   |      |
| rs17040773 | 2q13      | <i>ANAPC1</i>   | a   | c  | 0.76  | 0.05                      | 4.26E-06        | 0.03  | 6.08E-05                  | 21 | 0.14 | 0.04                                   | <b>1.51E-09</b> | 0.01             | 0.61                      | 0.01  | 0.21                      | 0  | 0.97  | 0.01             | 0.19                                   |      |
| rs1878526  | 2q14.2    | <i>INSIG2</i>   | a   | g  | 0.22  | 0.00                      | 0.70            | 0.00  | 0.97                      | 12 | 0.27 | 0.00                                   | 0.79            | 0.05             | 7.31E-06                  | 0.04  | 3.38E-06                  | 0  | 0.48  | 0.04             | <b>1.22E-10</b>                        |      |
| rs1026364  | 3q13.2    | <i>KIAA2018</i> | t   | g  | 0.37  | 0.04                      | 2.01E-06        | 0.03  | 2.51E-05                  | 0  | 0.66 | 0.03                                   | <b>4.08E-10</b> | 0.02             | 0.04                      | 0.02  | 7.26E-03                  | 33 | 0.04  | 0.02             | 7.57E-04                               |      |
| rs344081   | 3q25.31   | <i>LEKR1</i>    | t   | c  | 0.87  | 0.05                      | 1.09E-04        | 0.03  | 2.50E-03                  | 21 | 0.14 | 0.04                                   | 2.22E-06        | 0.06             | 2.76E-05                  | 0.06  | <b>3.54E-08</b>           | 0  | 0.77  | 0.06             | <b>4.46E-12</b>                        |      |
| rs3755955  | 4p16.3    | <i>IDUA</i>     | a   | g  | 0.16  | -0.06                     | 3.90E-07        | -0.05 | <b>6.14E-09</b>           | 6  | 0.37 | -0.06                                  | <b>1.46E-14</b> | -0.07            | 1.35E-07                  | -0.05 | <b>5.52E-09</b>           | 20 | 0.16  | -0.06            | <b>5.24E-15</b>                        |      |
| rs11755164 | 6p21.1    | <i>SUPT3H</i>   | t   | c  | 0.40  | -0.01                     | 0.23            | -0.01 | 0.12                      | 0  | 0.91 | -0.01                                  | 0.05            | -0.05            | 3.52E-07                  | -0.03 | 9.19E-06                  | 0  | 0.82  | -0.04            | <b>5.60E-11</b>                        |      |
| rs9466056  | 6p22.3    | <i>CDKAL1</i>   | a   | g  | 0.38  | -0.05                     | <b>1.80E-08</b> | -0.03 | 1.55E-06                  | 0  | 0.74 | -0.04                                  | <b>2.73E-13</b> | -0.04            | 6.53E-05                  | -0.03 | 1.11E-04                  | 16 | 0.21  | -0.03            | <b>3.56E-08</b>                        |      |
| rs3801387  | 7q13.31   | <i>WNT16</i>    | a   | g  | 0.74  | -0.07                     | <b>4.23E-14</b> | -0.08 | <b>2.00E-27</b>           | 12 | 0.27 | -0.08                                  | <b>5.02E-40</b> | -0.08            | <b>1.35E-16</b>           | -0.10 | <b>1.50E-36</b>           | 17 | 0.19  | -0.09            | <b>3.17E-51</b>                        |      |
| rs13245690 | 7q31.31   | <i>C7orf58</i>  | a   | g  | 0.65  | 0.03                      | 8.57E-05        | 0.00  | 0.69                      | 37 | 0.07 | 0.02                                   | 8.20E-04        | 0.05             | <b>1.07E-09</b>           | 0.03  | 1.30E-03                  | 18 | 0.24  | 0.05             | <b>1.65E-11</b>                        |      |
| rs7812088  | 7q36.1    | <i>ABCF2</i>    | a   | g  | 0.13  | 0.06                      | 1.22E-06        | 0.04  | 4.41E-04                  | 27 | 0.08 | 0.05                                   | <b>7.28E-09</b> | 0.06             | 2.93E-05                  | 0.04  | 1.10E-03                  | 50 | 0.002 | 0.04             | 2.24E-07                               |      |
| rs7017914* | 8q13.3    | <i>XKR9</i>     | a   | g  | 0.49  | 0.04                      | 3.60E-07        | 0.02  | 0.02                      | 10 | 0.35 | 0.03                                   | 2.29E-07        | 0.00             | 0.91                      | -0.01 | 0.11                      | 5  | 0.78  | -0.01            | 0.26                                   |      |
| rs7851693  | 9q34.11   | <i>FUBP3</i>    | c   | g  | 0.64  | 0.05                      | <b>3.08E-08</b> | 0.05  | <b>1.43E-15</b>           | 0  | 0.51 | 0.05                                   | <b>3.37E-22</b> | 0.02             | 0.06                      | 0.04  | 6.71E-08                  | 1  | 0.45  | 0.03             | 6.08E-08                               |      |
| rs3905706  | 10p11.23  | <i>MPP7</i>     | t   | c  | 0.22  | 0.00                      | 0.63            | -0.02 | 1.67E-03                  | 0  | 0.95 | -0.01                                  | 0.03            | 0.06             | <b>2.93E-09</b>           | 0.05  | <b>6.68E-09</b>           | 0  | 0.49  | 0.05             | <b>2.41E-16</b>                        |      |
| rs1373004  | 10q21.1   | <i>MBL2</i>     | t   | g  | 0.13  | -0.06                     | 1.39E-05        | -0.04 | 1.45E-04                  | 19 | 0.18 | -0.04                                  | <b>1.45E-08</b> | -0.07            | 5.40E-08                  | -0.05 | 2.24E-06                  | 26 | 0.10  | -0.06            | <b>1.56E-12</b>                        |      |
| rs7071206  | 10q22.3_1 | <i>KCNMA1</i>   | t   | c  | 0.78  | -0.01                     | 0.29            | 0.01  | 0.26                      | 1  | 0.45 | 0.00                                   | 0.81            | -0.07            | <b>1.54E-12</b>           | -0.05 | <b>6.24E-09</b>           | 28 | 0.07  | -0.06            | <b>5.02E-19</b>                        |      |
| rs7084921  | 10q24.2   | <i>CPN1</i>     | t   | c  | 0.39  | 0.03                      | 1.42E-04        | 0.03  | 1.55E-06                  | 0  | 0.51 | 0.03                                   | <b>9.03E-10</b> | 0.02             | 0.01                      | 0.03  | 1.92E-05                  | 15 | 0.23  | 0.03             | 9.15E-07                               |      |
| rs10835187 | 11p14.1_1 | <i>LIN7C</i>    | t   | c  | 0.55  | -0.01                     | 0.17            | -0.01 | 0.08                      | 0  | 0.91 | -0.01                                  | 0.03            | -0.04            | 3.04E-05                  | -0.02 | 2.36E-04                  | 24 | 0.11  | -0.03            | <b>4.90E-08</b>                        |      |
| rs7953528  | 12p11.22  | <i>KLHDC5</i>   | a   | t  | 0.18  | 0.06                      | 5.75E-08        | 0.04  | 2.43E-06                  | 0  | 0.54 | 0.05                                   | <b>1.87E-12</b> | 0.00             | 0.94                      | -0.02 | 0.05                      | 0  | 0.94  | -0.01            | 0.13                                   |      |
| rs2887571  | 12p13.33  | <i>ERC1</i>     | a   | g  | 0.76  | -0.04                     | 1.06E-04        | -0.03 | 1.60E-05                  | 25 | 0.10 | -0.03                                  | <b>6.49E-09</b> | -0.05            | 2.20E-07                  | -0.04 | 2.88E-06                  | 0  | 0.52  | -0.04            | <b>5.59E-12</b>                        |      |
| rs12821008 | 12q13.12  | <i>DHH</i>      | t   | c  | 0.39  | 0.03                      | 1.89E-04        | 0.03  | 5.20E-04                  | 0  | 0.72 | 0.03                                   | 3.34E-07        | 0.05             | 1.53E-07                  | 0.05  | <b>1.89E-09</b>           | 7  | 0.36  | 0.05             | <b>1.17E-15</b>                        |      |
| rs1053051  | 12q23.3   | <i>C12orf23</i> | t   | c  | 0.52  | -0.04                     | 1.35E-05        | -0.03 | 1.82E-05                  | 13 | 0.27 | -0.03                                  | <b>9.60E-10</b> | -0.04            | 2.47E-06                  | -0.02 | 2.38E-03                  | 0  | 0.86  | -0.03            | 7.90E-08                               |      |
| rs1286083  | 14q32.12  | <i>RPS6KA5</i>  | t   | c  | 0.81  | -0.06                     | <b>2.91E-08</b> | -0.05 | <b>9.32E-09</b>           | 0  | 0.50 | -0.05                                  | <b>2.02E-15</b> | -0.07            | <b>1.69E-11</b>           | -0.04 | 7.13E-06                  | 25 | 0.10  | -0.05            | <b>1.75E-14</b>                        |      |
| rs4985155  | 16p13.11  | <i>NTAN1</i>    | a   | g  | 0.67  | -0.03                     | 3.53E-04        | -0.03 | 1.38E-07                  | 4  | 0.41 | -0.03                                  | <b>1.74E-10</b> | -0.04            | 8.71E-07                  | -0.03 | 1.83E-04                  | 0  | 0.66  | -0.03            | <b>2.15E-09</b>                        |      |
| rs9921222  | 16p13.3_1 | <i>AXIN1</i>    | t   | c  | 0.48  | -0.04                     | 2.46E-07        | -0.03 | 2.37E-06                  | 43 | 0.01 | -0.04                                  | <b>5.18E-12</b> | -0.05            | <b>2.20E-08</b>           | -0.04 | <b>8.29E-10</b>           | 28 | 0.07  | -0.04            | <b>1.00E-16</b>                        |      |
| rs13336428 | 16p13.3_2 | <i>C16orf38</i> | a   | g  | 0.43  | -0.04                     | 2.87E-07        | -0.04 | <b>1.08E-10</b>           | 0  | 0.79 | -0.04                                  | <b>1.49E-16</b> | -0.04            | 5.94E-05                  | -0.04 | <b>5.75E-10</b>           | 0  | 0.65  | -0.04            | <b>1.66E-13</b>                        |      |
| rs1566045  | 16q12.1   | <i>SALL1</i>    | t   | c  | 0.80  | -0.07                     | <b>4.95E-12</b> | -0.06 | <b>3.03E-12</b>           | 30 | 0.05 | -0.06                                  | <b>1.94E-22</b> | -0.03            | 7.83E-03                  | -0.01 | 0.55                      | 25 | 0.11  | -0.01            | 0.04                                   |      |
| rs1564981  | 16q12.1   | <i>CYLD</i>     | a   | g  | 0.50  | -0.03                     | 1.05E-03        | -0.02 | 0.01                      | 23 | 0.18 | -0.02                                  | 4.38E-05        | -0.04            | 6.24E-08                  | -0.03 | 5.37E-04                  | 48 | 0.01  | -0.04            | <b>1.95E-10</b>                        |      |
| rs4790881  | 17p13.3   | <i>SMG6</i>     | a   | c  | 0.69  | 0.05                      | <b>1.66E-08</b> | 0.05  | <b>1.18E-11</b>           | 12 | 0.28 | 0.05                                   | <b>9.75E-19</b> | 0.03             | 6.04E-04                  | 0.04  | 1.65E-06                  | 27 | 0.09  | 0.03             | <b>3.38E-09</b>                        |      |
| rs7217932  | 17q24.3   | <i>SOX9</i>     | a   | g  | 0.46  | 0.05                      | <b>3.65E-08</b> | 0.03  | 2.69E-05                  | 5  | 0.39 | 0.03                                   | <b>1.92E-11</b> | 0.01             | 0.31                      | 0.01  | 0.15                      | 0  | 0.69  | 0.01             | 0.08                                   |      |
| rs4796995  | 18p11.21  | <i>C18orf19</i> | a   | g  | 0.63  | 0.04                      | 3.18E-06        | 0.02  | 1.13E-03                  | 39 | 0.01 | 0.03                                   | <b>4.85E-08</b> | 0.03             | 5.22E-04                  | 0.01  | 0.11                      | 14 | 0.24  | 0.02             | 6.65E-04                               |      |
| rs10416218 | 19q13.11  | <i>GPATCH1</i>  | t   | c  | 0.73  | -0.04                     | 5.73E-06        | -0.02 | 7.11E-04                  | 0  | 0.69 | -0.03                                  | 5.52E-08        | -0.06            | <b>9.19E-09</b>           | -0.03 | 1.22E-04                  | 0  | 0.96  | -0.04            | <b>6.64E-11</b>                        |      |
| rs5934507* | Xp22.31   | <i>FAM9B</i>    | a   | g  | 0.73  | -0.01                     | 0.09            | -0.01 | 0.16                      | 34 | 0.25 | -0.01                                  | 0.03            | -0.02            | 6.81E-03                  | -0.01 | 0.34                      | 37 | 0.08  | -0.02            | 7.29E-03                               |      |

P-values in bold reflect loci reaching GWS level. <sup>a</sup>Beta estimates (effect on each allele of the SNP on standardized BMD) and frequencies are reported for this allele. The measure of heterogeneity (Cochran's Qhet P statistic and I2) was calculated in the Stage 2 samples. \*These markers were GWS in the sex-stratified meta-analysis.

Supplementary Table 4B

Sex-combined meta-analysis results across stages for known loci associated with BMD at GWS level.

| SNP                    | Locus      | Closest Gene | A1 <sup>a</sup> | A2 | Freq1 | FNBMD                     |                 |                           |                 |                |                    | LSBMD                                  |                 |                           |                 |                           |                 |                                        |                 |       |                 |
|------------------------|------------|--------------|-----------------|----|-------|---------------------------|-----------------|---------------------------|-----------------|----------------|--------------------|----------------------------------------|-----------------|---------------------------|-----------------|---------------------------|-----------------|----------------------------------------|-----------------|-------|-----------------|
|                        |            |              |                 |    |       | STAGE 1<br>(Up to 32,961) |                 | STAGE 2<br>(Up to 50,933) |                 | I <sup>2</sup> | Q <sub>het</sub> P | STAGE 1 +<br>STAGE 2<br>(Up to 83,894) |                 | STAGE 1<br>(Up to 31,800) |                 | STAGE 2<br>(Up to 45,708) |                 | STAGE 1 +<br>STAGE 2<br>(Up to 77,508) |                 |       |                 |
|                        |            |              |                 |    |       | Beta                      | P               | Beta                      | P               |                |                    | Beta                                   | P               | Beta                      | P               | Beta                      | P               | Beta                                   | P               |       |                 |
| rs17482952             | 1p31.3     | WLS          | a               | g  | 0.93  | 0.08                      | 2.32E-07        | 0.08                      | 1.23E-05        | 17             | 0.25               | 0.08                                   | <b>1.31E-11</b> | 0.06                      | 7.19E-05        | 0.07                      | 5.66E-05        | 8                                      | 0.36            | 0.07  | <b>1.69E-08</b> |
| rs12407028             | 1p31.3     | WLS          | t               | c  | 0.60  | 0.05                      | <b>1.47E-08</b> | 0.05                      | <b>4.62E-16</b> | 0              | 0.75               | 0.05                                   | <b>3.44E-23</b> | 0.08                      | <b>6.86E-20</b> | 0.07                      | <b>1.12E-26</b> | 27                                     | 0.09            | 0.08  | <b>3.11E-45</b> |
| rs7521902              | 1p36.12    | WNT4         | a               | c  | 0.31  | -0.05                     | 8.78E-08        | -0.03                     | 3.92E-03        | 0              | 0.45               | -0.04                                  | <b>2.85E-09</b> | -0.05                     | 1.25E-06        | -0.05                     | 1.60E-05        | 42                                     | 0.03            | -0.05 | <b>9.66E-11</b> |
| rs6426749              | 1p36.12    | ZBTB40       | c               | g  | 0.17  | 0.11                      | <b>1.35E-23</b> | 0.11                      | <b>3.49E-35</b> | 0              | 0.86               | 0.11                                   | <b>7.39E-57</b> | 0.11                      | <b>2.35E-20</b> | 0.10                      | <b>3.66E-26</b> | 0                                      | 0.80            | 0.10  | <b>1.86E-44</b> |
| rs4233949              | 2p16.2     | SPTBN1       | c               | g  | 0.38  | 0.03                      | 1.49E-04        | 0.02                      | 6.40E-03        | 0              | 0.56               | 0.02                                   | 5.91E-06        | 0.06                      | <b>5.01E-12</b> | 0.04                      | <b>2.35E-08</b> | 41                                     | 0.01            | 0.05  | <b>2.25E-18</b> |
| rs1346004              | 2q24.3     | GALNT3       | a               | g  | 0.50  | -0.05                     | <b>1.79E-10</b> | -0.05                     | <b>1.16E-16</b> | 30             | 0.06               | -0.05                                  | <b>1.08E-25</b> | -0.05                     | <b>1.29E-08</b> | -0.07                     | <b>1.50E-23</b> | 6                                      | 0.37            | -0.06 | <b>3.87E-30</b> |
| rs430727               | 3p22.1     | CTNNB1       | t               | c  | 0.48  | -0.07                     | <b>9.73E-17</b> | -0.05                     | <b>3.43E-11</b> | 12             | 0.28               | -0.06                                  | <b>4.41E-25</b> | -0.06                     | <b>2.87E-09</b> | -0.05                     | <b>9.58E-11</b> | 27                                     | 0.10            | -0.05 | <b>1.54E-18</b> |
| rs6532023              | 4q22.1     | MEPE         | t               | g  | 0.34  | 0.05                      | <b>2.55E-09</b> | 0.06                      | <b>3.62E-18</b> | 0              | 0.53               | 0.06                                   | <b>4.95E-26</b> | 0.06                      | <b>1.72E-11</b> | 0.06                      | <b>7.32E-18</b> | 3                                      | 0.41            | 0.06  | <b>1.23E-27</b> |
| rs1366594              | 5q14.3     | MEF2C        | a               | c  | 0.54  | 0.09                      | <b>7.38E-29</b> | 0.08                      | <b>6.25E-34</b> | 26             | 0.09               | 0.08                                   | <b>4.47E-61</b> | 0.02                      | 0.03            | 0.01                      | 0.14            | 0                                      | 0.53            | 0.01  | 0.01            |
| rs13204965             | 6q22.32    | RSPO3        | a               | c  | 0.76  | 0.05                      | 1.49E-06        | 0.04                      | 7.24E-07        | 0              | 0.82               | 0.04                                   | <b>8.12E-12</b> | 0.04                      | 2.68E-04        | 0.04                      | 3.90E-07        | 0                                      | 0.75            | 0.04  | <b>3.61E-10</b> |
| rs7751941              | 6q25.1     | C6orf97      | a               | g  | 0.21  | -0.05                     | 5.34E-07        | -0.04                     | 7.49E-04        | 0              | 0.84               | -0.04                                  | <b>1.59E-09</b> | -0.08                     | <b>3.97E-14</b> | -0.08                     | <b>8.27E-12</b> | 32                                     | 0.10            | -0.08 | <b>1.99E-24</b> |
| rs4869742              | 6q25.1     | C6orf97      | t               | c  | 0.31  | -0.07                     | <b>3.61E-14</b> | -0.04                     | 5.38E-07        | 16             | 0.21               | -0.05                                  | <b>4.15E-18</b> | -0.09                     | <b>3.27E-20</b> | -0.07                     | <b>5.05E-17</b> | 14                                     | 0.24            | -0.08 | <b>3.95E-35</b> |
| rs10226308             | 7p14.1     | TXNDC3       | a               | g  | 0.84  | -0.03                     | 3.81E-03        | 0.00                      | 0.81            | 8              | 0.36               | -0.02                                  | 0.02            | -0.06                     | <b>3.36E-09</b> | -0.05                     | 3.17E-05        | 28                                     | 0.13            | -0.06 | <b>6.40E-13</b> |
| rs6959212              | 7p14.1     | STARD3NL     | t               | c  | 0.32  | -0.03                     | 6.36E-04        | -0.05                     | <b>1.85E-11</b> | 0              | 0.97               | -0.04                                  | <b>1.18E-13</b> | -0.08                     | <b>6.86E-17</b> | -0.07                     | <b>7.21E-23</b> | 0                                      | 0.66            | -0.07 | <b>3.76E-38</b> |
| rs4727338              | 7q21.3     | SLC25A13     | c               | g  | 0.67  | 0.08                      | <b>2.99E-20</b> | 0.08                      | <b>2.61E-29</b> | 26             | 0.09               | 0.08                                   | <b>8.10E-48</b> | 0.07                      | <b>1.11E-15</b> | 0.07                      | <b>5.24E-21</b> | 4                                      | 0.40            | 0.07  | <b>2.13E-35</b> |
| rs2062377              | 8q24.12    | TNFRSF11B    | a               | t  | 0.57  | -0.06                     | <b>2.50E-14</b> | -0.05                     | <b>2.63E-12</b> | 4              | 0.40               | -0.06                                  | <b>9.06E-25</b> | -0.08                     | <b>2.26E-20</b> | -0.07                     | <b>2.18E-20</b> | 0                                      | 0.59            | -0.08 | <b>3.16E-39</b> |
| rs7932354              | 11p11.2    | ARHGAP1      | t               | c  | 0.31  | 0.05                      | <b>2.29E-08</b> | 0.05                      | <b>3.46E-11</b> | 0              | 0.97               | 0.05                                   | <b>5.12E-18</b> | 0.04                      | 1.23E-05        | 0.04                      | 1.10E-07        | 0                                      | 0.60            | 0.04  | <b>5.45E-12</b> |
| rs163879               | 11p14.1_2  | DCDC5        | t               | c  | 0.68  | -0.04                     | 1.70E-06        | -0.02                     | 6.66E-04        | 34             | 0.03               | -0.03                                  | <b>2.06E-08</b> | -0.05                     | 8.81E-08        | -0.03                     | 1.72E-05        | 0                                      | 0.58            | -0.04 | <b>2.19E-11</b> |
| rs7108738              | 11p15.2    | SOX6         | t               | g  | 0.83  | -0.09                     | <b>1.03E-17</b> | -0.07                     | <b>1.82E-17</b> | 6              | 0.37               | -0.08                                  | <b>1.08E-32</b> | -0.05                     | 4.51E-05        | -0.03                     | 3.93E-03        | 30                                     | 0.06            | -0.03 | 2.14E-06        |
| rs3736228              | 11q13.2    | LRP5         | t               | c  | 0.16  | -0.05                     | 1.79E-06        | -0.05                     | 5.29E-06        | 0              | 0.80               | -0.05                                  | <b>4.83E-11</b> | -0.08                     | <b>1.62E-11</b> | -0.09                     | <b>1.30E-16</b> | 0                                      | 0.85            | -0.08 | <b>2.08E-26</b> |
| rs736825               | 12q13.13   | HOXC6        | c               | g  | 0.56  | 0.04                      | 7.65E-06        | 0.04                      | 2.76E-05        | 44             | 0.03               | 0.04                                   | <b>1.06E-09</b> | 0.05                      | <b>2.40E-10</b> | 0.05                      | 5.59E-07        | 41                                     | 0.04            | 0.05  | <b>7.68E-16</b> |
| rs2016266              | 12q13.13   | SP7          | a               | g  | 0.68  | -0.04                     | 4.79E-07        | -0.03                     | 4.48E-05        | 3              | 0.42               | -0.03                                  | <b>3.67E-10</b> | -0.06                     | <b>1.53E-11</b> | -0.05                     | <b>1.59E-10</b> | 0                                      | 0.76            | -0.05 | <b>2.95E-20</b> |
| rs9533090 <sup>b</sup> | 13q14.11   | AKAP11       | t               | c  | 0.49  | -0.05                     | <b>9.84E-11</b> | -0.05                     | <b>1.04E-13</b> | 27             | 0.09               | -0.05                                  | <b>4.94E-23</b> | -0.11                     | <b>1.02E-35</b> | -0.09                     | <b>1.92E-34</b> | 66.1 <sup>b</sup>                      | <b>2.73E-07</b> | -0.10 | <b>4.82E-68</b> |
| rs11623869             | 14q32.32   | MARK3        | t               | g  | 0.35  | -0.04                     | 1.26E-06        | -0.04                     | <b>7.02E-11</b> | 26             | 0.09               | -0.04                                  | <b>5.20E-16</b> | -0.03                     | 7.53E-04        | -0.04                     | <b>1.23E-08</b> | 1                                      | 0.45            | -0.04 | <b>5.12E-11</b> |
| rs10048146             | 16q24.1    | FOXL1        | a               | g  | 0.80  | 0.06                      | 1.28E-07        | 0.05                      | <b>1.63E-08</b> | 0              | 0.51               | 0.05                                   | <b>1.00E-14</b> | 0.06                      | <b>2.95E-08</b> | 0.04                      | 4.70E-05        | 0                                      | 0.93            | 0.05  | <b>3.09E-11</b> |
| rs4792909              | 17q21.31_1 | SOST         | t               | g  | 0.37  | 0.04                      | 1.85E-05        | 0.05                      | 8.74E-08        | 41             | 0.04               | 0.04                                   | <b>1.95E-11</b> | 0.04                      | 5.14E-07        | 0.03                      | 3.29E-04        | 23                                     | 0.18            | 0.04  | <b>9.43E-10</b> |
| rs227584               | 17q21.31_1 | C17orf53     | a               | c  | 0.70  | -0.06                     | <b>3.44E-11</b> | -0.05                     | <b>1.18E-14</b> | 9              | 0.32               | -0.06                                  | <b>2.56E-24</b> | -0.05                     | 4.77E-07        | -0.03                     | 1.23E-04        | 13                                     | 0.27            | -0.04 | <b>9.92E-10</b> |
| rs1864325              | 17q21.31_2 | MAPT         | t               | c  | 0.22  | -0.04                     | 7.79E-05        | -0.02                     | 0.06            | 10             | 0.31               | -0.03                                  | 7.47E-05        | -0.06                     | 1.11E-07        | -0.04                     | 3.11E-05        | 14                                     | 0.25            | -0.04 | <b>4.89E-11</b> |
| rs884205               | 18q21.33   | TNFRSF11A    | a               | c  | 0.27  | -0.04                     | 3.87E-05        | -0.03                     | 1.68E-06        | 0              | 0.70               | -0.04                                  | <b>3.18E-10</b> | -0.06                     | <b>4.85E-09</b> | -0.05                     | <b>2.61E-10</b> | 0                                      | 0.71            | -0.05 | <b>1.58E-17</b> |
| rs3790160              | 20p12.2    | JAG1         | t               | c  | 0.50  | 0.04                      | 1.32E-07        | 0.03                      | 2.44E-06        | 25             | 0.10               | 0.04                                   | <b>3.61E-12</b> | 0.06                      | <b>5.36E-11</b> | 0.04                      | <b>3.84E-10</b> | 21                                     | 0.15            | 0.05  | <b>3.07E-19</b> |

P-values in bold reflect loci reaching GWS level. <sup>a</sup>Beta estimates (effect on each allele of the SNP on standardized BMD) and frequencies are reported for this allele. The measure of heterogeneity (Cochran's Qhet P statistic and I<sup>2</sup>) was calculated in the Stage 2 samples. <sup>b</sup>The SNP rs9533090 was the only GWS SNP with high degree of heterogeneity of effects (I<sup>2</sup>>50%). After applying random effects meta-analysis, this marker was still significant (P=3.98x10<sup>-13</sup>)

Supplementary Table 4C Sex-combined meta-analysis results across stages for BMD loci not reaching GWS

| SNP        | Locus     | Closest Gene | A1 <sup>a</sup> | A2             | Freq1            | FNBMD          |          |                |          |                   |      | LSBMD          |                |                  |          |                   |          |    |      |       |          |
|------------|-----------|--------------|-----------------|----------------|------------------|----------------|----------|----------------|----------|-------------------|------|----------------|----------------|------------------|----------|-------------------|----------|----|------|-------|----------|
|            |           |              |                 |                |                  | STAGE 1        |          | STAGE 2        |          | STAGE 1 + STAGE 2 |      | STAGE 1        |                | STAGE 2          |          | STAGE 1 + STAGE 2 |          |    |      |       |          |
|            |           |              |                 |                |                  | (Up to 32,961) |          | (Up to 50,933) |          | (Up to 83,894)    |      | (Up to 31,800) |                | (Up to 45,708)   |          | (Up to 77,508)    |          |    |      |       |          |
| Beta       | P         | Beta         | P               | I <sup>2</sup> | Q <sub>het</sub> | P              | Beta     | P              | Beta     | P                 | Beta | P              | I <sup>2</sup> | Q <sub>het</sub> | P        | Beta              | P        |    |      |       |          |
| rs11809524 | 1p21.1    | COL11A1      | t               | c              | 0.85             | 0.06           | 1.37E-06 | 0.02           | 0.06     | 13                | 0.26 | 0.03           | 9.32E-06       | 0.05             | 1.06E-04 | 0.02              | 0.10     | 0  | 0.69 | 0.03  | 2.23E-04 |
| rs12137389 | 1p34.1    | TESK2        | t               | c              | 0.03             | -0.13          | 3.05E-06 | -0.01          | 0.69     | 31                | 0.05 | -0.06          | 5.76E-04       | -0.05            | 0.07     | 0.02              | 0.45     | 24 | 0.12 | -0.01 | 0.52     |
| rs2120461  | 1p36.23   | RERE         | t               | c              | 0.67             | 0.05           | 3.91E-08 | 0.01           | 0.10     | 0                 | 0.49 | 0.03           | 3.07E-06       | 0.04             | 1.44E-04 | 0.02              | 3.53E-03 | 21 | 0.15 | 0.03  | 3.11E-06 |
| rs12120297 | 1q41      | SUSP4        | t               | c              | 0.86             | 0.04           | 7.95E-04 | -0.01          | 0.38     | 17                | 0.20 | 0.01           | 0.24           | 0.06             | 3.05E-06 | 0.01              | 0.45     | 0  | 0.53 | 0.03  | 1.19E-03 |
| rs730402   | 2p16.1    | BCL11A       | a               | g              | 0.45             | 0.03           | 9.01E-05 | 0.00           | 0.44     | 0                 | 0.76 | 0.02           | 2.49E-03       | 0.02             | 0.04     | 0.001             | 0.88     | 0  | 0.57 | 0.01  | 0.16     |
| rs13413210 | 2p23.2    | ALK          | a               | c              | 0.91             | -0.02          | 0.23     | -0.01          | 0.58     | 0                 | 0.69 | -0.01          | 0.25           | -0.05            | 3.86E-03 | 0.001             | 0.92     | 7  | 0.36 | -0.02 | 0.10     |
| rs11675051 | 2q32.2    | NAB1         | a               | g              | 0.33             | 0.04           | 2.38E-06 | 0.01           | 0.07     | 23                | 0.12 | 0.02           | 1.02E-05       | 0.01             | 0.12     | 0.01              | 0.11     | 0  | 0.49 | 0.01  | 0.03     |
| rs12995369 | 2q33.1    | ALS2CR7      | a               | g              | 0.52             | 0.05           | 1.94E-07 | 0.01           | 0.24     | 6                 | 0.37 | 0.02           | 8.40E-05       | 0.03             | 4.71E-03 | 0.001             | 0.84     | 14 | 0.24 | 0.01  | 0.09     |
| rs6436440  | 2q36.1    | AP1S3        | a               | g              | 0.47             | 0.03           | 2.46E-05 | 0.01           | 0.06     | 0                 | 0.98 | 0.02           | 4.58E-05       | 0.03             | 6.44E-04 | 0.02              | 7.13E-03 | 0  | 0.70 | 0.02  | 2.41E-05 |
| rs7427438  | 3p24.1    | RBMS3        | a               | c              | 0.33             | -0.04          | 2.99E-05 | -0.01          | 0.13     | 34                | 0.04 | -0.02          | 1.16E-04       | -0.01            | 0.15     | 0.004             | 0.65     | 0  | 0.59 | 0.00  | 0.55     |
| rs2291296  | 3p24.2    | RARB         | a               | g              | 0.17             | -0.004         | 0.74     | -0.01          | 0.11     | 0                 | 0.82 | -0.01          | 0.15           | -0.04            | 1.20E-04 | -0.02             | 0.02     | 22 | 0.14 | -0.03 | 3.01E-05 |
| rs4957742  | 5q21.3    | EFNA5        | a               | g              | 0.77             | -0.04          | 4.74E-06 | -0.01          | 0.45     | 0                 | 0.55 | -0.02          | 5.21E-04       | -0.03            | 7.56E-03 | -0.005            | 0.59     | 14 | 0.25 | -0.01 | 0.03     |
| rs2282930  | 7p12.2    | GRB10        | a               | g              | 0.24             | -0.04          | 8.09E-06 | -0.02          | 0.01     | 0                 | 0.71 | -0.03          | 3.43E-06       | -0.03            | 4.85E-03 | -0.02             | 4.10E-03 | 0  | 0.84 | -0.02 | 6.51E-05 |
| rs7788807  | 7p22.1_1  | FOXP1        | t               | c              | 0.94             | 0.02           | 0.17     | 0.00           | 0.96     | 0                 | 0.89 | 0.01           | 0.41           | 0.06             | 1.74E-03 | 0.01              | 0.54     | 29 | 0.07 | 0.03  | 0.01     |
| rs2008425  | 7p22.1_2  | RNF216       | t               | g              | 0.02             | -0.08          | 0.03     | -0.05          | 0.06     | 20                | 0.15 | -0.06          | 5.08E-03       | -0.11            | 2.01E-03 | -0.04             | 0.10     | 15 | 0.23 | -0.06 | 1.86E-03 |
| rs1670346  | 7q36.3    | PTPRN2       | a               | g              | 0.29             | -0.04          | 2.81E-06 | 0.00           | 0.78     | 0                 | 0.60 | -0.02          | 2.27E-03       | -0.02            | 0.03     | 0.002             | 0.77     | 15 | 0.23 | -0.01 | 0.28     |
| rs13272568 | 8q21.12   | PKIA         | a               | c              | 0.44             | -0.04          | 2.13E-06 | -0.02          | 9.76E-03 | 0                 | 0.66 | -0.03          | 6.08E-07       | -0.01            | 0.10     | -0.004            | 0.53     | 27 | 0.09 | -0.01 | 0.13     |
| rs4240467  | 9q33.2    | DAB2IP       | c               | g              | 0.32             | -0.0004        | 0.96     | 0.01           | 0.51     | 34                | 0.04 | 0.003          | 0.64           | -0.01            | 0.56     | -0.004            | 0.58     | 2  | 0.43 | 0.00  | 0.42     |
| rs2784767  | 10q22.3_2 | PLAC9        | t               | c              | 0.41             | 0.03           | 5.08E-04 | 0.00           | 0.60     | 19                | 0.17 | 0.01           | 0.02           | 0.02             | 0.07     | -0.01             | 0.23     | 0  | 0.89 | 0.00  | 0.96     |
| rs11602954 | 11p15.5   | BET1L        | a               | g              | 0.24             | 0.03           | 1.06E-03 | 0.01           | 0.17     | 0                 | 0.47 | 0.02           | 1.92E-03       | 0.06             | 2.74E-07 | 0.02              | 0.05     | 0  | 0.94 | 0.03  | 2.25E-06 |
| rs600231   | 11q13.1   | SCYL1        | a               | g              | 0.70             | -0.04          | 1.19E-05 | -0.02          | 0.01     | 0                 | 0.74 | -0.02          | 4.03E-06       | -0.02            | 0.03     | -0.005            | 0.53     | 0  | 0.94 | -0.01 | 0.07     |
| rs11048046 | 12p12.1   | IFLTD1       | a               | g              | 0.09             | -0.03          | 0.09     | 0.00           | 0.99     | 0                 | 0.97 | -0.01          | 0.25           | -0.01            | 0.50     | -0.001            | 0.98     | 0  | 0.73 | -0.01 | 0.63     |
| rs7326472  | 13q14.11  | AKAP11       | a               | g              | 0.92             | -0.05          | 2.55E-03 | -0.04          | 0.06     | 30                | 0.12 | -0.05          | 5.07E-04       | -0.10            | 9.80E-08 | -0.04             | 0.05     | 2  | 0.43 | -0.07 | 2.61E-07 |
| rs2118784  | 15q21.2   | CYP19A1      | a               | c              | 0.28             | -0.04          | 5.20E-05 | 0.00           | 0.55     | 17                | 0.20 | -0.02          | 3.48E-03       | -0.03            | 5.02E-03 | -0.01             | 0.20     | 16 | 0.21 | -0.02 | 6.72E-03 |
| rs7226305  | 17q22     | KIF2B        | a               | c              | 0.84             | -0.02          | 0.13     | 0.00           | 0.71     | 0                 | 0.75 | -0.004         | 0.54           | -0.06            | 1.33E-06 | 0.002             | 0.81     | 33 | 0.04 | -0.02 | 6.66E-03 |
| rs7257450  | 19p13.11  | PLVAP        | a               | g              | 0.79             | 0.01           | 0.55     | 0.00           | 0.92     | 0                 | 0.84 | 0.003          | 0.68           | 0.05             | 4.01E-05 | -0.001            | 0.94     | 0  | 0.65 | 0.02  | 0.03     |
| rs4817775  | 21q22.12  | CBR3         | a               | c              | 0.59             | 0.02           | 6.24E-03 | 0.01           | 0.04     | 19                | 0.16 | 0.02           | 8.59E-04       | 0.04             | 1.49E-06 | 0.02              | 0.01     | 14 | 0.24 | 0.03  | 8.94E-07 |
| rs4820539  | 22q11.23  | RTDR1        | a               | g              | 0.42             | 0.04           | 4.86E-06 | 0.02           | 2.10E-03 | 1                 | 0.45 | 0.03           | 1.65E-07       | 0.03             | 3.65E-03 | 0.02              | 1.63E-03 | 0  | 0.93 | 0.02  | 1.96E-05 |
| rs5926033  | Xp22.11   | DDX53        | t               | c              | 0.71             | 0.04           | 4.13E-06 | 0.01           | 0.19     | 0                 | 0.68 | 0.03           | 9.73E-06       | 0.01             | 0.10     | 0.01              | 0.35     | 0  | 0.49 | 0.01  | 0.06     |
| rs5952638  | Xp11.3    | DUSP21       | a               | t              | 0.93             | 0.06           | 3.03E-04 | 0.01           | 0.72     | 12                | 0.35 | 0.04           | 2.74E-03       | 0.07             | 2.29E-05 | -0.001            | 0.94     | 0  | 0.72 | 0.04  | 1.74E-03 |
| rs4492531  | Xq13.3    | MAGEE2       | a               | g              | 0.55             | -0.07          | 1.98E-03 | 0.01           | 0.59     | 0                 | 0.92 | -0.03          | 0.08           | -0.09            | 2.40E-05 | -0.02             | 0.39     | 4  | 0.41 | -0.05 | 4.52E-04 |
| rs964181   | Xq28      | MAGEA4       | t               | c              | 0.41             | 0.04           | 4.72E-06 | -0.01          | 0.20     | 0                 | 0.57 | 0.02           | 8.33E-03       | 0.03             | 5.22E-04 | 0.01              | 0.48     | 0  | 0.60 | 0.02  | 2.17E-03 |

P-values in italics reflect loci reaching suggestive significance level. <sup>a</sup>Beta estimates (effect on each allele of the SNP on standardized BMD) and frequencies are reported for this allele. The measure of heterogeneity (Cochran's Qhet P statistic and I2) was calculated in the Stage 2 samples.



Supplementary Table 5B Gender-stratified meta-analysis results across stages for known loci associated with BMD at GWS level.

|            |            | FNBMD      |            |                      |      |           |                 |                      |                 |            |                 |                            |                      |       |                 |            | LSBMD                |       |         |                 |                      |                 |                            |                 |       |                 |       |                 |       |                 |      |
|------------|------------|------------|------------|----------------------|------|-----------|-----------------|----------------------|-----------------|------------|-----------------|----------------------------|----------------------|-------|-----------------|------------|----------------------|-------|---------|-----------------|----------------------|-----------------|----------------------------|-----------------|-------|-----------------|-------|-----------------|-------|-----------------|------|
|            |            | FEMALES    |            |                      |      |           | MALES           |                      |                 |            |                 | Gender<br>Het <sup>b</sup> | FEMALES              |       |                 |            |                      | MALES |         |                 |                      |                 | Gender<br>Het <sup>b</sup> |                 |       |                 |       |                 |       |                 |      |
|            |            | STAGE 1    | STAGE 2    | STAGE 1 +<br>STAGE 2 | P    | STAGE 1   | STAGE 2         | STAGE 1 +<br>STAGE 2 | P               | STAGE 1    | STAGE 2         |                            | STAGE 1 +<br>STAGE 2 | P     | STAGE 1         | STAGE 2    | STAGE 1 +<br>STAGE 2 | P     | STAGE 1 | STAGE 2         | STAGE 1 +<br>STAGE 2 | P               |                            |                 |       |                 |       |                 |       |                 |      |
| SNP        | Locus      | (n=22,990) | (n=39,060) | (n=62,050)           |      | (n=9,971) | (n=11,885)      | (n=21,856)           |                 | (n=22,177) | (n=34,521)      |                            | (n=56,698)           |       | (n=9,980)       | (n=11,214) | (n=21,194)           |       |         |                 |                      |                 |                            |                 |       |                 |       |                 |       |                 |      |
| rs12407028 | 1p31.3     | WLS        | t          | c                    | 0.61 | 0.06      | <b>1.18E-08</b> | 0.06                 | <b>1.77E-15</b> | 0.06       | <b>1.46E-22</b> | 0.03                       | 0.04                 | 0.04  | 0.04            | 0.03       | 1.15E-03             | 0.04  | 0.08    | <b>4.57E-16</b> | 0.08                 | <b>2.19E-22</b> | 0.08                       | <b>5.51E-37</b> | 0.08  | 9.60E-08        | 0.07  | 5.19E-06        | 0.07  | <b>2.81E-12</b> | 0.60 |
| rs6426749  | 1p36.12    | ZBTB40     | c          | g                    | 0.17 | 0.11      | <b>1.88E-19</b> | 0.11                 | <b>4.86E-27</b> | 0.11       | <b>7.83E-45</b> | 0.09                       | 1.64E-06             | 0.11  | <b>1.26E-09</b> | 0.10       | <b>1.16E-14</b>      | 0.63  | 0.11    | <b>7.58E-18</b> | 0.10                 | <b>1.34E-20</b> | 0.11                       | <b>1.08E-36</b> | 0.09  | 2.26E-05        | 0.09  | 3.78E-07        | 0.09  | <b>3.81E-11</b> | 0.29 |
| rs4233949  | 2p16.2     | SPTBN1     | c          | g                    | 0.38 | 0.03      | 4.49E-03        | 0.02                 | 0.03            | 0.02       | 4.15E-04        | 0.04                       | 4.67E-03             | 0.02  | 0.11            | 0.03       | 1.78E-03             | 0.39  | 0.06    | <b>2.72E-09</b> | 0.04                 | 2.52E-06        | 0.05                       | <b>9.31E-14</b> | 0.06  | 5.46E-05        | 0.05  | 1.47E-03        | 0.05  | 3.35E-07        | 0.74 |
| rs1346004  | 2q24.3     | GALNT3     | a          | g                    | 0.49 | -0.05     | <b>1.35E-08</b> | -0.05                | <b>3.89E-14</b> | -0.05      | <b>3.31E-21</b> | -0.05                      | 1.34E-03             | -0.05 | 3.45E-04        | -0.05      | 1.56E-06             | 0.54  | -0.04   | 2.57E-05        | -0.06                | <b>2.84E-16</b> | -0.06                      | <b>1.17E-19</b> | -0.07 | 4.79E-06        | -0.08 | <b>3.89E-09</b> | -0.07 | <b>1.04E-13</b> | 0.10 |
| rs430727   | 3p22.1     | CTNNA1     | t          | c                    | 0.47 | -0.07     | <b>7.29E-13</b> | -0.04                | <b>3.29E-08</b> | -0.05      | <b>1.39E-18</b> | -0.07                      | 5.98E-06             | -0.05 | 2.46E-04        | -0.06      | <b>6.85E-09</b>      | 0.56  | -0.06   | 1.28E-07        | -0.05                | <b>6.40E-09</b> | -0.05                      | <b>4.53E-15</b> | -0.06 | 3.48E-05        | -0.04 | 4.74E-03        | -0.05 | 8.90E-07        | 0.88 |
| rs6532023  | 4q22.1     | MEPE       | t          | g                    | 0.34 | 0.06      | <b>2.04E-09</b> | 0.06                 | <b>1.42E-13</b> | 0.06       | <b>1.22E-21</b> | 0.03                       | 0.07                 | 0.06  | 4.78E-06        | 0.05       | 4.42E-06             | 0.40  | 0.07    | <b>2.25E-11</b> | 0.06                 | <b>1.48E-12</b> | 0.06                       | <b>2.71E-22</b> | 0.04  | 0.01            | 0.07  | 5.93E-07        | 0.06  | 9.85E-08        | 0.62 |
| rs1366594  | 5q14.3     | MEF2C      | a          | c                    | 0.53 | 0.10      | <b>6.48E-25</b> | 0.08                 | <b>2.58E-26</b> | 0.09       | <b>7.85E-49</b> | 0.08                       | <b>4.18E-08</b>      | 0.08  | <b>1.78E-09</b> | 0.08       | <b>4.24E-16</b>      | 0.64  | 0.02    | 0.02            | 0.01                 | 0.52            | 0.01                       | 0.05            | 0.02  | 0.32            | 0.03  | 0.06            | 0.02  | 0.04            | 0.46 |
| rs13204965 | 6q22.32    | RSPO3      | a          | c                    | 0.76 | 0.07      | 2.90E-07        | 0.05                 | 4.43E-07        | 0.05       | <b>1.90E-12</b> | 0.02                       | 0.21                 | 0.02  | 0.35            | 0.02       | 0.12                 | 0.04  | 0.05    | 8.23E-04        | 0.04                 | 1.77E-05        | 0.04                       | 5.38E-08        | 0.04  | 0.02            | 0.05  | 9.44E-03        | 0.05  | 5.73E-04        | 0.83 |
| rs4869742  | 6q25.1     | C6orf97    | t          | c                    | 0.32 | -0.07     | <b>1.40E-11</b> | -0.03                | 9.59E-05        | -0.05      | <b>3.14E-13</b> | -0.06                      | 1.48E-04             | -0.06 | 1.53E-05        | -0.06      | <b>8.84E-09</b>      | 0.24  | -0.09   | <b>3.39E-15</b> | -0.06                | <b>6.67E-11</b> | -0.07                      | <b>9.41E-24</b> | -0.09 | 8.95E-08        | -0.09 | <b>5.02E-09</b> | -0.09 | <b>2.56E-15</b> | 0.19 |
| rs6959212  | 7p14.1     | STARD3NL   | t          | c                    | 0.34 | -0.03     | 9.26E-03        | -0.05                | <b>1.09E-09</b> | -0.04      | <b>1.30E-10</b> | -0.04                      | 0.01                 | -0.04 | 3.31E-03        | -0.04      | 9.15E-05             | 0.90  | -0.08   | <b>3.68E-13</b> | -0.08                | <b>2.54E-20</b> | -0.08                      | <b>4.10E-32</b> | -0.07 | 4.23E-06        | -0.05 | 2.20E-04        | -0.06 | <b>6.12E-09</b> | 0.23 |
| rs4727338  | 7q21.3     | SLC25A13   | c          | g                    | 0.67 | 0.08      | <b>1.92E-15</b> | 0.08                 | <b>6.04E-24</b> | 0.08       | <b>1.20E-37</b> | 0.08                       | 2.01E-07             | 0.07  | 3.73E-07        | 0.08       | <b>3.33E-13</b>      | 0.73  | 0.07    | <b>2.23E-10</b> | 0.07                 | <b>1.00E-15</b> | 0.07                       | <b>1.34E-24</b> | 0.09  | 6.43E-08        | 0.07  | 1.18E-06        | 0.08  | <b>4.67E-13</b> | 0.48 |
| rs2062377  | 8q24.12    | TNFRSF11B  | a          | t                    | 0.59 | -0.06     | <b>1.16E-09</b> | -0.05                | <b>1.68E-09</b> | -0.05      | <b>1.60E-17</b> | -0.07                      | 8.34E-07             | -0.06 | 3.26E-04        | -0.06      | <b>1.50E-09</b>      | 0.33  | -0.08   | <b>7.13E-16</b> | -0.07                | <b>3.35E-15</b> | -0.07                      | <b>2.55E-29</b> | -0.07 | 9.83E-07        | -0.08 | 8.65E-07        | -0.08 | <b>3.94E-12</b> | 0.91 |
| rs7932354  | 11p11.2    | ARHGAP1    | t          | c                    | 0.33 | 0.05      | 9.97E-07        | 0.04                 | 2.77E-06        | 0.04       | <b>1.60E-11</b> | 0.05                       | 3.41E-03             | 0.07  | 3.93E-07        | 0.06       | <b>9.34E-09</b>      | 0.16  | 0.04    | 3.49E-04        | 0.04                 | 1.09E-05        | 0.04                       | <b>1.34E-08</b> | 0.04  | 8.59E-03        | 0.04  | 4.39E-03        | 0.04  | 1.09E-04        | 0.85 |
| rs163879   | 11p14.1_2  | DCDC5      | t          | c                    | 0.66 | -0.04     | 1.19E-04        | -0.02                | 9.89E-03        | -0.03      | 1.15E-05        | -0.05                      | 1.34E-03             | -0.04 | 9.74E-03        | -0.05      | 4.10E-05             | 0.15  | -0.05   | 5.13E-07        | -0.02                | 4.40E-03        | -0.03                      | 1.01E-07        | -0.04 | 7.47E-03        | -0.06 | 1.03E-04        | -0.05 | 3.67E-06        | 0.18 |
| rs7108738  | 11p15.2    | SOX6       | t          | g                    | 0.82 | -0.09     | <b>6.42E-14</b> | -0.07                | <b>3.47E-14</b> | -0.08      | <b>3.52E-26</b> | -0.08                      | 2.55E-05             | -0.07 | 9.09E-05        | -0.07      | <b>1.05E-08</b>      | 0.69  | -0.05   | 1.20E-04        | -0.02                | 0.03            | -0.03                      | 5.76E-05        | -0.03 | 0.14            | -0.03 | 0.05            | -0.03 | 0.01            | 0.99 |
| rs3736228  | 11q13.2    | LRP5       | t          | c                    | 0.15 | -0.05     | 5.08E-04        | -0.05                | 9.14E-05        | -0.05      | 1.82E-07        | -0.08                      | 2.30E-04             | -0.05 | 0.02            | -0.06      | 2.06E-05             | 0.32  | -0.08   | <b>1.91E-08</b> | -0.10                | <b>1.34E-15</b> | -0.09                      | <b>2.80E-22</b> | -0.10 | 5.51E-06        | -0.06 | 0.01            | -0.08 | 4.21E-07        | 0.53 |
| rs2016266  | 12q13.13   | SP7        | a          | g                    | 0.69 | -0.04     | 2.91E-05        | -0.02                | 1.43E-03        | -0.03      | 3.82E-07        | -0.04                      | 0.01                 | -0.04 | 7.19E-03        | -0.04      | 2.39E-04             | 0.54  | -0.07   | <b>2.18E-10</b> | -0.05                | <b>6.68E-09</b> | -0.06                      | <b>2.13E-17</b> | -0.04 | 5.72E-03        | -0.04 | 5.36E-03        | -0.04 | 9.14E-05        | 0.29 |
| rs9533090  | 13q14.11   | AKAP11     | t          | c                    | 0.48 | -0.06     | <b>1.80E-10</b> | -0.05                | <b>2.79E-13</b> | -0.06      | <b>3.36E-22</b> | -0.03                      | 0.03                 | -0.03 | 0.06            | -0.03      | 3.61E-03             | 0.05  | -0.12   | <b>6.31E-31</b> | -0.10                | <b>6.92E-33</b> | -0.11                      | <b>1.51E-61</b> | -0.09 | <b>7.43E-09</b> | -0.08 | 7.96E-07        | -0.09 | <b>2.62E-14</b> | 0.16 |
| rs11623869 | 14q32.32   | MARK3      | t          | g                    | 0.34 | -0.04     | 1.41E-05        | -0.05                | <b>1.70E-09</b> | -0.05      | <b>1.27E-13</b> | -0.04                      | 8.02E-03             | -0.04 | 9.64E-03        | -0.04      | 2.12E-04             | 0.59  | -0.03   | 9.24E-03        | -0.04                | 3.83E-07        | -0.04                      | <b>2.30E-08</b> | -0.04 | 7.11E-03        | -0.04 | 6.65E-03        | -0.04 | 1.30E-04        | 0.74 |
| rs10048146 | 16q24.1    | FOXL1      | a          | g                    | 0.80 | 0.05      | 5.29E-06        | 0.04                 | 3.40E-05        | 0.05       | <b>1.14E-09</b> | 0.06                       | 9.58E-04             | 0.07  | 4.50E-05        | 0.07       | 1.66E-07             | 0.15  | 0.07    | 1.55E-07        | 0.04                 | 1.27E-04        | 0.05                       | <b>4.37E-10</b> | 0.06  | 3.52E-03        | 0.03  | 0.13            | 0.04  | 2.10E-03        | 0.59 |
| rs227584   | 17q21.31_1 | C17orf53   | a          | c                    | 0.67 | -0.06     | <b>3.31E-09</b> | -0.05                | <b>1.35E-10</b> | -0.06      | <b>3.15E-18</b> | -0.05                      | 2.11E-03             | -0.06 | 1.99E-05        | -0.06      | 1.87E-07             | 0.86  | -0.04   | 5.66E-05        | -0.03                | 2.98E-03        | -0.03                      | 1.64E-06        | -0.06 | 2.96E-04        | -0.04 | 0.01            | -0.05 | 1.63E-05        | 0.23 |
| rs1864325  | 17q21.31_2 | MAPT       | t          | c                    | 0.22 | -0.04     | 1.68E-03        | -0.01                | 0.25            | -0.02      | 4.60E-03        | -0.05                      | 4.55E-03             | -0.03 | 0.06            | -0.04      | 8.44E-04             | 0.14  | -0.06   | 8.01E-06        | -0.03                | 4.83E-04        | -0.04                      | <b>3.96E-08</b> | -0.06 | 1.40E-03        | -0.04 | 0.02            | -0.05 | 9.06E-05        | 0.63 |
| rs884205   | 18q21.33   | TNFRSF11A  | a          | c                    | 0.25 | -0.05     | 2.57E-05        | -0.04                | 9.47E-07        | -0.04      | <b>1.43E-10</b> | -0.03                      | 0.13                 | -0.01 | 0.38            | -0.02      | 0.10                 | 0.06  | -0.07   | 2.67E-07        | -0.06                | <b>9.12E-10</b> | -0.06                      | <b>1.66E-15</b> | -0.06 | 8.99E-04        | -0.03 | 0.04            | -0.04 | 1.63E-04        | 0.28 |
| rs3790160  | 20p12.2    | JAG1       | t          | c                    | 0.50 | 0.04      | 2.58E-05        | 0.02                 | 6.36E-04        | 0.03       | 1.31E-07        | 0.05                       | 6.06E-04             | 0.05  | 2.90E-04        | 0.05       | 6.14E-07             | 0.09  | 0.06    | <b>1.81E-08</b> | 0.04                 | 9.42E-07        | 0.05                       | <b>2.49E-13</b> | 0.05  | 6.94E-04        | 0.06  | 3.49E-05        | 0.05  | 9.21E-08        | 0.45 |

<sup>a</sup>Beta estimates (effect on each allele of the SNP on standardized BMD) and frequencies are reported for this allele. <sup>b</sup>gender-specificity null hypothesis, i.e.,  $\beta_{\text{FEMALES}} = \beta_{\text{MALES}}$ , estimated in the combined STAGE1 + STAGE 2 meta-analysis.



**Supplementary Table 6 Association of BMD loci with Any low-trauma fracture across stage categories**

| SNP       | Risk Allele | Locus     | Closest Gene | Freq1 | STAGE 1 (In-silico 1)      |          | STAGE 2 (In-silico 2)      |          | STAGE 2 (De-novo genotyping) |          | STAGE 2 (Insilico 2 + De-novo) |          | COMBINED (STAGE 1 + STAGE 2) |          | I <sup>2</sup> | Qhet P |             |   |
|-----------|-------------|-----------|--------------|-------|----------------------------|----------|----------------------------|----------|------------------------------|----------|--------------------------------|----------|------------------------------|----------|----------------|--------|-------------|---|
|           |             |           |              |       | 5411 cases, 21909 controls | P        | 9187 cases, 45057 controls | P        | 16418 cases, 35478 controls  | P        | OR (95% CI)                    | P        | OR (95% CI)                  | P        |                |        | OR (95% CI) | P |
|           |             |           |              |       | OR (95% CI)                | P        | OR (95% CI)                | P        | OR (95% CI)                  | P        | OR (95% CI)                    | P        | OR (95% CI)                  | P        |                |        | OR (95% CI) | P |
| rs6426749 | G           | 1p36.12   | ZBTB40       | 0.83  | 1.1 (1.03-1.16)            | 0.003    | 1.11 (1.06-1.17)           | 4.20E-05 | 1.03 (0.99-1.07)             | 0.141    | 1.06 (1.03-1.09)               | 2.36E-04 | 1.07 (1.04-1.1)              | 3.60E-06 | 24             | 0.07   |             |   |
| rs7521902 | A           | 1p36.12*  | WNT4         | 0.27  | 1.08 (1.02-1.15)           | 0.012    | 1.12 (1.06-1.18)           | 1.50E-05 | 1.07 (1-1.13)                | 0.038    | 1.10 (1.06-1.14)               | 3.51E-06 | 1.09 (1.06-1.13)             | 1.40E-07 | 0              | 0.87   |             |   |
| rs4233949 | G           | 2p16.2    | SPTBN1       | 0.63  | 1.05 (1-1.1)               | 0.052    | 1.08 (1.04-1.13)           | 3.00E-05 | 1.05 (1.02-1.09)             | 6.50E-04 | 1.07 (1.04-1.09)               | 1.39E-07 | 1.06 (1.04-1.08)             | 2.60E-08 | 6              | 0.36   |             |   |
| rs430727  | T           | 3p22.1    | CTNNA1       | 0.47  | 1.07 (1.02-1.12)           | 0.003    | 1.04 (1.01-1.08)           | 0.026    | 1.06 (1.03-1.09)             | 2.90E-04 | 1.05 (1.03-1.08)               | 2.44E-05 | 1.06 (1.03-1.08)             | 2.90E-07 | 0              | 0.93   |             |   |
| rs6532023 | G           | 4q22.1    | MEPE         | 0.67  | 1.07 (1.02-1.12)           | 0.006    | 1.03 (0.99-1.07)           | 0.12     | 1.08 (1.05-1.12)             | 5.20E-07 | 1.06 (1.04-1.09)               | 8.84E-07 | 1.06 (1.04-1.09)             | 1.70E-08 | 0              | 1.00   |             |   |
| rs6959212 | T           | 7p14.1    | STARD3NL     | 0.33  | 1.06 (1.01-1.11)           | 0.021    | 1.02 (0.98-1.06)           | 0.276    | 1.05 (1.02-1.09)             | 0.001    | 1.04 (1.02-1.07)               | 1.02E-03 | 1.05 (1.02-1.07)             | 7.20E-05 | 2              | 0.43   |             |   |
| rs4727338 | G           | 7q21.3    | SLC25A13     | 0.32  | 1.08 (1.03-1.13)           | 0.002    | 1.09 (1.05-1.14)           | 1.30E-05 | 1.06 (1.03-1.1)              | 1.10E-04 | 1.08 (1.05-1.1)                | 1.04E-08 | 1.08 (1.05-1.1)              | 5.90E-11 | 31             | 0.03   |             |   |
| rs3801387 | A           | 7q31.31   | WNT16        | 0.74  | 1.01 (0.97-1.05)           | 0.666    | 1.07 (1.02-1.11)           | 0.004    | 1.09 (1.06-1.13)             | 2.30E-07 | 1.08 (1.05-1.11)               | 4.98E-09 | 1.06 (1.04-1.08)             | 2.70E-07 | 0              | 0.69   |             |   |
| rs7851693 | G           | 9q34.11   | FUBP3        | 0.37  | 1.07 (1.03-1.12)           | 0.003    | 1.06 (1.02-1.1)            | 0.003    | 1.03 (1-1.06)                | 0.094    | 1.04 (1.01-1.06)               | 1.88E-03 | 1.05 (1.02-1.07)             | 3.50E-05 | 0              | 0.65   |             |   |
| rs1373004 | T           | 10q21.1   | MBL2/DKK1    | 0.13  | 1.11 (1.04-1.19)           | 0.003    | 1.05 (1-1.12)              | 0.065    | 1.12 (1.07-1.17)             | 1.10E-06 | 1.09 (1.06-1.13)               | 7.19E-07 | 1.1 (1.06-1.13)              | 9.00E-09 | 0              | 0.64   |             |   |
| rs163879  | T           | 11p14.1   | DCDC5        | 0.66  | 1.01 (0.96-1.06)           | 0.775    | 1.05 (1.01-1.1)            | 0.011    | 1.06 (1.03-1.1)              | 1.70E-04 | 1.06 (1.03-1.09)               | 6.40E-06 | 1.05 (1.03-1.07)             | 3.30E-05 | 28             | 0.05   |             |   |
| rs3736228 | T           | 11q13.2   | LRP5         | 0.15  | 1.11 (1.04-1.19)           | 0.002    | 1.14 (1.08-1.2)            | 6.60E-07 | 1.05 (1-1.1)                 | 0.051    | 1.09 (1.05-1.12)               | 2.06E-06 | 1.09 (1.06-1.13)             | 1.40E-08 | 0              | 0.78   |             |   |
| rs1286083 | T           | 14q32.12  | RP56KA5      | 0.81  | 1.07 (1.01-1.13)           | 0.024    | 1.08 (1.02-1.13)           | 0.004    | 1.04 (1-1.08)                | 0.05     | 1.05 (1.02-1.08)               | 9.76E-04 | 1.05 (1.03-1.08)             | 7.20E-05 | 34             | 0.01   |             |   |
| rs4792909 | G           | 17q21.31* | SOST         | 0.62  | 1.05 (1-1.11)              | 0.053    | 1.07 (1.03-1.12)           | 0.001    | 1.07 (1.02-1.13)             | 0.009    | 1.07 (1.04-1.11)               | 3.99E-05 | 1.07 (1.04-1.1)              | 6.90E-06 | 10             | 0.31   |             |   |
| rs227584  | A           | 17q21.31  | C17orf53     | 0.67  | 1.05 (1-1.1)               | 0.076    | 1.06 (1.02-1.1)            | 0.007    | 1.04 (1.01-1.08)             | 0.01     | 1.05 (1.02-1.08)               | 2.17E-04 | 1.05 (1.03-1.07)             | 4.10E-05 | 0              | 0.49   |             |   |
| rs4796995 | G           | 18p11.21  | C18orf19     | 0.39  | 1.15 (1.1-1.2)             | 3.50E-09 | 1.07 (1.03-1.11)           | 3.80E-04 | 1.06 (1.02-1.09)             | 3.90E-04 | 1.06 (1.04-1.09)               | 6.37E-07 | 1.08 (1.06-1.1)              | 8.80E-13 | 20             | 0.12   |             |   |

The odds ratios are per allele copy for any low-trauma fracture among cases as compared with controls across stages. Stage 1: Samples also used in the discovery of BMD-associated variants. Results of Stage 2 are here divided by In-silico replication and de-novo genotyped studies. The measures of heterogeneity (Cochran's Q statistic and I<sup>2</sup>) was calculated in the combined data set across all stages.



**Supplementary Table 7 Proportion of Fracture Risk explained by BMD.**

| SNP       | Risk Allele | Locus      | Closest Gene    | ANYFRACTURE (8594 cases, 23218 controls) |        |          |                |        |          | Fracture risk explained by BMD |
|-----------|-------------|------------|-----------------|------------------------------------------|--------|----------|----------------|--------|----------|--------------------------------|
|           |             |            |                 | not FNBMD adjusted                       |        |          | FNBMD adjusted |        |          |                                |
|           |             |            |                 | Effect                                   | StdErr | P        | Effect         | StdErr | P        |                                |
| rs4796995 | G           | 18p11.21   | <i>C18orf19</i> | 0.08                                     | 0.02   | 8.77E-05 | 0.07           | 0.02   | 1.12E-03 | 0.15                           |
| rs4727338 | G           | 7q21.3     | <i>SLC25A13</i> | 0.08                                     | 0.02   | 2.78E-04 | 0.05           | 0.02   | 1.46E-02 | 0.32                           |
| rs3801387 | A           | 7q31.31    | <i>WNT16</i>    | 0.08                                     | 0.02   | 3.17E-04 | 0.05           | 0.02   | 2.15E-02 | 0.35                           |
| rs227584  | A           | 17q21.31_1 | <i>C17orf53</i> | 0.08                                     | 0.02   | 4.84E-04 | 0.06           | 0.02   | 9.78E-03 | 0.25                           |
| rs1373004 | T           | 10q21.1    | <i>MBL2</i>     | 0.11                                     | 0.03   | 5.09E-04 | 0.09           | 0.03   | 3.27E-03 | 0.14                           |
| rs163879  | T           | 11p14.1_2  | <i>DCDC5</i>    | 0.06                                     | 0.02   | 1.85E-03 | 0.06           | 0.02   | 5.29E-03 | 0.09                           |
| rs430727  | T           | 3p22.1     | <i>CTNNB1</i>   | 0.06                                     | 0.02   | 4.13E-03 | 0.05           | 0.02   | 2.63E-02 | 0.21                           |
| rs6532023 | G           | 4q22.1     | <i>MEPE</i>     | 0.05                                     | 0.02   | 1.27E-02 | 0.03           | 0.02   | 1.40E-01 | 0.40                           |
| rs4233949 | G           | 2p16.2     | <i>SPTBN1</i>   | 0.05                                     | 0.02   | 3.07E-02 | 0.04           | 0.02   | 5.60E-02 | 0.10                           |
| rs6959212 | T           | 7p14.1     | <i>STARD3NL</i> | 0.04                                     | 0.02   | 4.68E-02 | 0.03           | 0.02   | 1.73E-01 | 0.30                           |
| rs3736228 | T           | 11q13.2    | <i>LRP5</i>     | 0.05                                     | 0.03   | 0.13     | 0.04           | 0.03   | 0.29     | NS                             |
| rs7851693 | G           | 9q34.11    | <i>FUBP3</i>    | 0.03                                     | 0.02   | 0.17     | 0.01           | 0.02   | 0.56     | NS                             |
| rs1286083 | T           | 14q32.12   | <i>RPS6KA5</i>  | 0.03                                     | 0.03   | 0.17     | 0.02           | 0.03   | 0.35     | NS                             |
| rs6426749 | G           | 1p36.12    | <i>ZBTB40</i>   | 0.03                                     | 0.03   | 0.28     | 0.01           | 0.03   | 0.76     | NS                             |

Supplementary Table 8

Results of meta-analysis for different types of fractures

| SNP       | Locus    | Closest Gene    | Risk Allele | Freq | ANYFRACTURE                  |         | NONVERTEBRAL FRACTURE       |         | VERTEBRAL FRACTURE          |         |
|-----------|----------|-----------------|-------------|------|------------------------------|---------|-----------------------------|---------|-----------------------------|---------|
|           |          |                 |             |      | 31016 cases, 102444 controls |         | 12941 cases, 41263 controls |         | 3659 cases, 17,899 controls |         |
|           |          |                 |             |      | OR (95% CI)                  | P       | OR (95% CI)                 | P       | OR (95% CI)                 | P       |
| rs6426749 | 1p36.12  | <i>ZBTB40</i>   | G           | 0.83 | 1.07 (1.04-1.1)              | 3.6E-06 | 1.09 (1.04-1.13)            | 1.8E-04 | 1.04 (0.97-1.12)            | 0.28    |
| rs4233949 | 2p16.2   | <i>SPTBN1</i>   | G           | 0.63 | 1.06 (1.04-1.08)             | 2.6E-08 | 1.06 (1.02-1.09)            | 8.7E-04 | 1.02 (0.96-1.08)            | 0.50    |
| rs430727  | 3p22.1   | <i>CTNNB1</i>   | T           | 0.47 | 1.06 (1.03-1.08)             | 2.9E-07 | 1.03 (1-1.07)               | 4.6E-02 | 1.07 (1.01-1.14)            | 0.02    |
| rs6532023 | 4q22.1   | <i>MEPE</i>     | G           | 0.67 | 1.06 (1.04-1.09)             | 1.7E-08 | 1.07 (1.03-1.11)            | 2.4E-04 | 1.11 (1.04-1.18)            | 9.3E-04 |
| rs6959212 | 7p14.1   | <i>STARD3NL</i> | T           | 0.33 | 1.05 (1.03-1.08)             | 7.2E-05 | 1.07 (1.03-1.1)             | 3.4E-04 | 1.04 (0.98-1.1)             | 0.24    |
| rs4727338 | 7q21.3   | <i>SLC25A13</i> | G           | 0.32 | 1.08 (1.05-1.1)              | 5.9E-11 | 1.07 (1.04-1.11)            | 5.2E-05 | 1.08 (1.02-1.15)            | 0.01    |
| rs3801387 | 7q31.31  | <i>WNT16</i>    | A           | 0.74 | 1.06 (1.04-1.08)             | 2.7E-07 | 1.1 (1.06-1.14)             | 2.4E-07 | 0.98 (0.93-1.05)            | 0.62    |
| rs7851693 | 9q34.11  | <i>FUBP3</i>    | G           | 0.37 | 1.05 (1.02-1.07)             | 3.5E-05 | 1.05 (1.01-1.09)            | 4.8E-03 | 0.96 (0.91-1.02)            | 0.18    |
| rs1373004 | 10q21.1  | <i>MBL2</i>     | T           | 0.13 | 1.1 (1.06-1.13)              | 9.0E-09 | 1.11 (1.05-1.17)            | 1.2E-04 | 1.05 (0.96-1.15)            | 0.29    |
| rs163879  | 11p14.1  | <i>DCDC5</i>    | T           | 0.66 | 1.05 (1.03-1.07)             | 3.3E-05 | 1.05 (1.01-1.09)            | 6.3E-03 | 1.04 (0.98-1.11)            | 0.20    |
| rs3736228 | 11q13.2  | <i>LRP5</i>     | T           | 0.15 | 1.09 (1.06-1.13)             | 1.4E-08 | 1.07 (1.02-1.13)            | 4.7E-03 | 1.02 (0.94-1.11)            | 0.61    |
| rs1286083 | 14q32.12 | <i>RPS6KA5</i>  | T           | 0.81 | 1.05 (1.02-1.07)             | 7.2E-05 | 1.07 (1.03-1.12)            | 1.7E-03 | 0.99 (0.92-1.06)            | 0.74    |
| rs227584  | 17q21.31 | <i>C17orf53</i> | A           | 0.67 | 1.05 (1.03-1.07)             | 4.1E-05 | 1.04 (1.01-1.08)            | 2.1E-02 | 1.05 (0.99-1.12)            | 0.11    |
| rs4796995 | 18p11.21 | <i>C18orf19</i> | G           | 0.39 | 1.08 (1.06-1.1)              | 8.8E-13 | 1.08 (1.04-1.11)            | 1.5E-05 | 1.02 (0.97-1.08)            | 0.46    |

**Supplementary Table 9 Weights for Allele Score Modeling**

| SNP        | Allele1 | Effect     |
|------------|---------|------------|
| rs6426749  | G       | 2.75566397 |
| rs1366594  | C       | 2.10711923 |
| rs3801387  | A       | 1.99772615 |
| rs4727338  | G       | 1.98730776 |
| rs17482952 | G       | 1.95865719 |
| rs7108738  | T       | 1.73726641 |
| rs6532023  | G       | 1.54192161 |
| rs736825   | G       | 1.53931702 |
| rs1566045  | T       | 1.47159749 |
| rs3755955  | A       | 1.45336531 |
| rs12407028 | C       | 1.39606416 |
| rs2062377  | A       | 1.36741359 |
| rs7851693  | G       | 1.3622044  |
| rs227584   | A       | 1.35178601 |
| rs1346004  | A       | 1.34918141 |
| rs10048146 | G       | 1.33615843 |
| rs9533090  | T       | 1.27364809 |
| rs1286083  | T       | 1.25541591 |
| rs6959212  | T       | 1.19811477 |
| rs3736228  | T       | 1.18248718 |
| rs7932354  | C       | 1.15904581 |
| rs430727   | T       | 1.15123202 |
| rs4790881  | C       | 1.14341822 |
| rs13336428 | A       | 1.13299983 |
| rs4792909  | G       | 1.09653547 |
| rs11623869 | T       | 1.09132628 |
| rs479336   | T       | 1.08611708 |
| rs13204965 | C       | 1.08090789 |
| rs7953528  | T       | 1.07830329 |
| rs7812088  | G       | 0.98974698 |
| rs17040773 | C       | 0.91160906 |
| rs4985155  | A       | 0.89337688 |
| rs4869742  | T       | 0.88295849 |
| rs7751941  | A       | 0.86212171 |
| rs884205   | A       | 0.85691252 |
| rs1026364  | G       | 0.84128493 |
| rs2887571  | A       | 0.83347114 |
| rs1053051  | T       | 0.83347114 |
| rs1373004  | T       | 0.81784356 |
| rs9466056  | A       | 0.79961138 |
| rs7584262  | C       | 0.77617    |
| rs3790160  | C       | 0.73970564 |
| rs7084921  | C       | 0.73449644 |
| rs2016266  | A       | 0.6797999  |
| rs12821008 | C       | 0.66156772 |
| rs9921222  | T       | 0.65896312 |
| rs1564981  | A       | 0.65635852 |
| rs10416218 | T       | 0.65375393 |
| rs344081   | C       | 0.65375393 |
| rs163879   | T       | 0.65114933 |
| rs7217932  | G       | 0.64854473 |
| rs7521902  | A       | 0.64073094 |
| rs3905706  | T       | 0.61468497 |
| rs4233949  | G       | 0.53915165 |
| rs4796995  | G       | 0.47664131 |
| rs1864325  | T       | 0.44278154 |
| rs7017914  | G       | 0.43236316 |
| rs10226308 | G       | 0.2891103  |
| rs10835187 | T       | 0.28390111 |
| rs11755164 | T       | 0.20315859 |
| rs13245690 | G       | 0.1901356  |
| rs7071206  | C       | 0.14064826 |
| rs1878526  | A       | 0.06771953 |

Weights are based on the stage 2 meta-analysis effects sizes for FN-BMD and standardized using a mean centric calibration

**Supplementary Table 10 Associated top SNPs from FN-BMD association analysis using 1000G imputed genotypes (Pooled analysis)**

| Targeted (Lead) SNPs (identified in HapMap Imputation) |      |           |      |        |       |          | Most significant SNPs (1000G Imputation) |           |      |        |       |          |                                                            |
|--------------------------------------------------------|------|-----------|------|--------|-------|----------|------------------------------------------|-----------|------|--------|-------|----------|------------------------------------------------------------|
| SNP rs#                                                | Chr. | Position  | Freq | Effect | SE    | P-value  | SNP rs#                                  | Position  | Freq | Effect | SE    | P-value  | log <sub>10</sub> (P <sub>lead</sub> /P <sub>1000G</sub> ) |
| rs1346004                                              | 2    | 166309292 | 0.51 | -0.049 | 0.009 | 8.98E-08 | rs28549203                               | 166282329 | 0.31 | -0.063 | 0.010 | 1.00E-09 | -2.0                                                       |
| rs4727338                                              | 7    | 95958611  | 0.67 | 0.073  | 0.009 | 6.89E-15 | rs4729260                                | 95955854  | 0.68 | 0.079  | 0.010 | 1.40E-16 | -1.7                                                       |
| rs7017914*                                             | 8    | 71753757  | 0.51 | 0.040  | 0.009 | 1.76E-05 | rs3110251                                | 72099528  | 0.52 | -0.046 | 0.009 | 3.12E-07 | -1.8                                                       |
| rs7932354                                              | 11   | 46678797  | 0.32 | 0.043  | 0.010 | 1.10E-05 | rs12274785                               | 46670855  | 0.70 | -0.050 | 0.010 | 5.80E-07 | -1.3                                                       |
| rs4796995                                              | 18   | 13698574  | 0.63 | 0.041  | 0.009 | 8.70E-06 | rs12955116                               | 13678383  | 0.33 | -0.054 | 0.010 | 1.82E-07 | -1.7                                                       |

Loci with a more significant marker (defined as change in significance of more than one order of magnitude) identified in regional imputation using P values from targeted snps are updated from meta-analysis of same studies that contributed to 1000G regional imputation.

\*This locus was selected in the gender-stratified meta-analysis

**Supplementary Table 11 Associated top SNPs from LS-BMD association analysis using 1000G imputed genotypes (Pooled analysis)**

| Targeted (Lead) SNPs (identified in HapMap Imputation) |      |           |      |        |       |          | Most significant SNPs (1000G Imputation) |           |      |        |       |          |                                               |
|--------------------------------------------------------|------|-----------|------|--------|-------|----------|------------------------------------------|-----------|------|--------|-------|----------|-----------------------------------------------|
| SNP rs#                                                | Chr. | Position  | Freq | Effect | SE    | P-value  | SNP rs#                                  | Position  | Freq | Effect | SE    | P-value  | log10(P <sub>lead</sub> /P <sub>1000G</sub> ) |
| rs1878526*                                             | 2    | 118755068 | 0.23 | 0.038  | 0.011 | 9.02E-04 | chr2:118804639                           | 118804639 | 0.08 | 0.100  | 0.022 | 3.41E-06 | -2.4                                          |
| rs3801387                                              | 7    | 120762001 | 0.74 | -0.075 | 0.011 | 4.26E-12 | rs3779381                                | 120754026 | 0.76 | -0.082 | 0.011 | 2.03E-13 | -1.3                                          |
| rs1373004*                                             | 10   | 54097831  | 0.12 | -0.075 | 0.015 | 5.92E-07 | rs7902708                                | 54109734  | 0.12 | -0.082 | 0.015 | 5.68E-08 | -1.0                                          |
| rs10835187*                                            | 11   | 27462253  | 0.55 | -0.039 | 0.009 | 2.53E-05 | rs12270727                               | 26672194  | 0.06 | 0.214  | 0.036 | 2.80E-09 | -4.0                                          |
| rs3736228                                              | 11   | 67957871  | 0.15 | -0.073 | 0.013 | 1.89E-08 | rs2291467                                | 67973332  | 0.25 | -0.069 | 0.011 | 5.14E-10 | -1.6                                          |
| rs12821008                                             | 12   | 47760872  | 0.39 | 0.049  | 0.010 | 1.02E-06 | rs3741619                                | 47675743  | 0.36 | 0.058  | 0.011 | 5.38E-08 | -1.3                                          |
| rs2016266                                              | 12   | 52014222  | 0.69 | -0.058 | 0.010 | 1.13E-08 | rs894736                                 | 52704433  | 0.60 | 0.061  | 0.010 | 2.49E-10 | -1.7                                          |
| rs10416218                                             | 19   | 38290967  | 0.73 | -0.047 | 0.011 | 9.61E-06 | rs12977993                               | 38272293  | 0.26 | 0.057  | 0.011 | 3.24E-07 | -1.5                                          |

Loci with a more significant marker (defined as change in significance of more than one order of magnitude) identified in regional imputation using 1000Genomes. P values from targeted snps are updated from meta-analysis of same studies that contributed to 1000G regional imputation.

\*These loci were selected in the gender-stratified meta-analysis

Supplementary Table 12 Predicted functional SNPs (imputed from 1000 Genomes Project) in LD ( $r^2 > 0.8$ ) with targeted SNP in each locus

| Targeted SNPs | FNBMD    |          | LSBMD      |                       | Locus      | Gene_Symbol | Functional SNP | Distance |       |      | FNBMD  |                 |        | LSBMD           |                        |                                                  | Type | Possible Functional Effects |
|---------------|----------|----------|------------|-----------------------|------------|-------------|----------------|----------|-------|------|--------|-----------------|--------|-----------------|------------------------|--------------------------------------------------|------|-----------------------------|
|               | P-values |          |            |                       |            |             |                | (Kb)     | $r^2$ | D'   | Allele | Freq            | Effect | P-value         | Effect                 | P-value                                          |      |                             |
| rs12407028    | 7.89E-06 | 5.15E-12 | 1p31.3     | <i>hsa-mir-1262</i>   | rs2772297  | 4.37        | 1.00           | 1.00     | t     | 0.40 | -0.041 | 7.43E-06        | -0.067 | 5.46E-12        | INTRONIC               | Promoter/regulatory region                       |      |                             |
| rs4233949     | 1.96E-05 | 1.88E-12 | 2p16.2     | <i>SPTBN1</i>         | rs4305309  | 24.00       | 0.83           | 0.93     | t     | 0.35 | 0.031  | 1.06E-03        | 0.069  | 1.64E-11        | INTRONIC               | Promoter/regulatory region                       |      |                             |
| rs1026364     | 5.46E-05 | 1.22E-01 | 3q13.2     | <i>KIAA2018</i>       | rs9813630  | 7.4         | 0.91           | 1.00     | a     | 0.66 | -0.032 | 3.19E-04        | -0.012 | 2.08E-01        | SYNONYMOUS             | Sense/synonymous; Splicing regulation            |      |                             |
| rs1026364     | 5.46E-05 | 1.22E-01 | 3q13.2     | <i>KIAA2018</i>       | rs9866806  | 9.9         | 0.91           | 1.00     | c     | 0.35 | 0.035  | 1.69E-04        | 0.013  | 1.94E-01        | NON_SYNONYMOUS         | Missense (conservative); Splicing regulation     |      |                             |
| rs3755955     | 3.53E-07 | 9.29E-08 | 4p16.3     | <i>IDUA</i>           | rs3755955  | 0.00        | 1.00           | 1.00     | a     | 0.16 | -0.067 | 3.53E-07        | -0.076 | 9.29E-08        | NON_SYNONYMOUS         | Missense (conservative)                          |      |                             |
| rs3755955     | 3.53E-07 | 9.29E-08 | 4p16.3     | <i>IDUA</i>           | rs6815946  | 0.89        | 1.00           | 1.00     | t     | 0.84 | 0.068  | 1.57E-07        | 0.079  | 1.74E-08        | SYNONYMOUS_CODING      | Sense/synonymous; Splicing regulation            |      |                             |
| rs3755955     | 3.53E-07 | 9.29E-08 | 4p16.3     | <i>IDUA</i>           | rs6848974  | 1.05        | 1.00           | 1.00     | t     | 0.15 | -0.061 | 1.25E-06        | -0.063 | 3.77E-06        | SPLICE_SITE            | splicing site                                    |      |                             |
| rs3755955     | 3.53E-07 | 9.29E-08 | 4p16.3     | <i>IDUA</i>           | rs6831280  | 1.75        | 1.00           | 1.00     | a     | 0.16 | -0.069 | 1.18E-07        | -0.079 | 1.88E-08        | NON_SYNONYMOUS         | Missense (conservative); Splicing regulation     |      |                             |
| rs4727338     | 6.89E-15 | 1.84E-12 | 7q21.3     | <i>FLJ42280</i>       | rs4729260  | 2.76        | 0.92           | 1.00     | c     | 0.68 | 0.079  | <b>1.40E-16</b> | 0.079  | <b>3.48E-14</b> | INTRONIC               | Promoter/regulatory region                       |      |                             |
| rs3801387     | 8.98E-11 | 4.26E-12 | 7q31.31    | <i>WNT16</i>          | rs3779381  | 7.98        | 0.87           | 1.00     | a     | 0.76 | -0.074 | <b>2.77E-12</b> | -0.082 | <b>2.03E-13</b> | INTRONIC               | Promoter/regulatory region                       |      |                             |
| rs7017914     | 1.76E-05 | 9.44E-01 | 8q13.3     | <i>LACTB2</i>         | rs13271442 | 6.0         | 0.97           | 1.00     | t     | 0.49 | 0.043  | <b>1.37E-06</b> | 0.000  | 9.63E-01        | WITHIN_NON_CODING_GENE | Promoter/regulatory region                       |      |                             |
| rs7932354     | 1.10E-05 | 4.72E-05 | 11p11.2    | <i>F2</i>             | rs2070852  | 22.7        | 0.96           | 1.00     | c     | 0.68 | -0.044 | 6.23E-06        | -0.044 | 1.89E-05        | SPLICE_SITE            | splicing site                                    |      |                             |
| rs3736228     | 2.38E-05 | 1.89E-08 | 11q13.2    | <i>LRP5</i>           | rs3736228  | 0.00        | 1.00           | 1.00     | t     | 0.16 | -0.052 | 2.38E-05        | -0.073 | 1.89E-08        | NON_SYNONYMOUS         | Missense (conservative); Splicing regulation     |      |                             |
| rs2016266     | 1.26E-04 | 1.13E-08 | 12q13.13   | <i>ESPL1</i>          | rs1318648  | 57.41       | 0.93           | 1.00     | a     | 0.65 | -0.030 | 1.24E-03        | -0.048 | 1.02E-06        | NON_SYNONYMOUS         | Missense (non-conservative); Splicing regulation |      |                             |
| rs2016266     | 1.26E-04 | 1.13E-08 | 12q13.13   | <i>ESPL1</i>          | rs1110720  | 45.63       | 0.96           | 1.00     | a     | 0.65 | -0.031 | 6.76E-04        | -0.050 | 3.26E-07        | SYNONYMOUS_CODING      | Sense/synonymous; Splicing regulation            |      |                             |
| rs11623869    | 4.58E-08 | 7.13E-05 | 14q32.32   | <i>MARK3</i>          | rs2273699  | 39.84       | 0.96           | 1.00     | a     | 0.64 | 0.049  | 2.08E-07        | 0.038  | 1.39E-04        | SPLICE_SITE            | splicing site                                    |      |                             |
| rs11623869    | 4.58E-08 | 7.13E-05 | 14q32.32   | <i>CKB</i>            | rs1803283  | 102.6       | 1.00           | 1.00     | t     | 0.65 | 0.047  | 3.44E-07        | 0.034  | 4.91E-04        | SYNONYMOUS             | Sense/synonymous; Splicing regulation            |      |                             |
| rs4985155     | 1.60E-03 | 7.08E-06 | 16p13.11   | <i>PDXDC1</i>         | rs7200543  | 0.5         | 0.89           | 1.00     | a     | 0.70 | -0.029 | 2.43E-03        | -0.046 | 6.37E-06        | SYNONYMOUS             | Sense/synonymous; Splicing regulation            |      |                             |
| rs4985155     | 1.60E-03 | 7.08E-06 | 16p13.11   | <i>NTAN1</i>          | rs1136001  | 2.52        | 0.89           | 1.00     | t     | 0.29 | 0.029  | 2.42E-03        | 0.046  | 6.83E-06        | 3PRIME_UTR             | Missense (conservative); Splicing regulation     |      |                             |
| rs227584      | 1.17E-09 | 5.88E-08 | 17q21.31_1 | <i>C17orf53</i>       | rs227584   | 0.00        | 1.00           | 1.00     | a     | 0.69 | -0.061 | 1.17E-09        | -0.057 | 5.88E-08        | NON_SYNONYMOUS         | Missense (conservative); Splicing regulation     |      |                             |
| rs227584      | 1.17E-09 | 5.88E-08 | 17q21.31_1 | <i>C17orf65/ASB16</i> | rs7212573  | 28.73       | 1.00           | 1.00     | a     | 0.69 | -0.060 | 2.20E-09        | -0.056 | 1.08E-07        | NON_SYNONYMOUS         | Missense (non-conservative); Splicing regulation |      |                             |
| rs227584      | 1.17E-09 | 5.88E-08 | 17q21.31_1 | <i>C17orf65/ASB16</i> | rs7212854  | 28.9        | 0.83           | 1.00     | a     | 0.72 | -0.056 | 4.84E-08        | -0.052 | 1.86E-06        | NON_SYNONYMOUS         | Missense (non-conservative); Splicing regulation |      |                             |
| rs227584      | 1.17E-09 | 5.88E-08 | 17q21.31_1 | <i>C17orf65/ASB16</i> | rs7217858  | 29.0        | 0.93           | 1.00     | t     | 0.70 | -0.057 | 1.45E-08        | -0.054 | 4.67E-07        | NON_SYNONYMOUS         | Missense (conservative)                          |      |                             |
| rs227584      | 1.17E-09 | 5.88E-08 | 17q21.31_1 | <i>C17orf65/ASB16</i> | rs3826412  | 29.6        | 1.00           | 1.00     | t     | 0.69 | -0.059 | 3.18E-09        | -0.056 | 1.05E-07        | SPLICE_SITE            | splicing site                                    |      |                             |
| rs1864325     | 3.26E-03 | 1.09E-04 | 17q21.31_2 | <i>AC217771.1</i>     | rs12373123 | 53.77       | 1.00           | 1.00     | t     | 0.79 | 0.032  | 3.58E-03        | 0.044  | 1.68E-04        | NON_SYNONYMOUS         | Missense (non-conservative); Splicing regulation |      |                             |
| rs1864325     | 3.26E-03 | 1.09E-04 | 17q21.31_2 | <i>AC217771.1</i>     | rs12373139 | 53.71       | 1.00           | 1.00     | a     | 0.21 | -0.032 | 4.00E-03        | -0.044 | 1.89E-04        | NON_SYNONYMOUS         | Missense (non-conservative); Splicing regulation |      |                             |
| rs1864325     | 3.26E-03 | 1.09E-04 | 17q21.31_2 | <i>AC217771.1</i>     | rs12373142 | 53.64       | 1.00           | 1.00     | c     | 0.79 | 0.032  | 3.48E-03        | 0.044  | 1.62E-04        | NON_SYNONYMOUS         | Missense (non-conservative); Splicing regulation |      |                             |
| rs1864325     | 3.26E-03 | 1.09E-04 | 17q21.31_2 | <i>MAPT</i>           | rs10445337 | 89.61       | 1.00           | 1.00     | t     | 0.79 | 0.031  | 4.24E-03        | 0.045  | 1.23E-04        | NON_SYNONYMOUS         | Missense (conservative)                          |      |                             |
| rs10416218    | 6.10E-05 | 9.61E-06 | 19q13.11   | <i>GPATCH1</i>        | rs2287679  | 1.6         | 1.00           | 1.00     | t     | 0.73 | -0.041 | 4.56E-05        | -0.048 | 5.99E-06        | NON_SYNONYMOUS         | Missense (conservative); Splicing regulation     |      |                             |
| rs10416218    | 6.10E-05 | 9.61E-06 | 19q13.11   | <i>GPATCH1</i>        | rs10416265 | 6.2         | 1.00           | 1.00     | a     | 0.72 | -0.040 | 1.02E-04        | -0.044 | 4.23E-05        | NON_SYNONYMOUS         | Missense (conservative)                          |      |                             |

P values from targeted snps are updated from meta-analysis of same studies that contributed to 1000G regional imputation. Boldface represent loci where a more significant marker (defined as change in significance of more than one order of magnitude) identified in regional imputation using 1000Genomes using pooled analysis on the same trait.

**Supplementary Table 13** Correlation between BMD at femoral neck and lumbar spine and gene expression in trans-iliacal bone biopsies

---

| Locus      | Gene            | Probe     | P value  |        | P value LS | r-LS   |
|------------|-----------------|-----------|----------|--------|------------|--------|
|            |                 |           | FN       | r-FN   |            |        |
| 2p16.2     | <i>PSME4</i>    | 212222_at | 0.019    | -0.255 | 6.30E-04   | -0.365 |
| 10q21.1    | <i>DKK1</i>     | 204602_at | 1.30E-05 | 0.456  | 3.20E-04   | 0.383  |
| 17p13.3    | <i>C17orf91</i> | 214696_at | 6.30E-04 | -0.365 | 8.80E-04   | -0.356 |
| 17q21.31_1 | <i>SOST</i>     | 223869_at | 4.80E-04 | 0.373  | 0.0069     | 0.292  |
| 17q21.31_1 | <i>DUSP3</i>    | 201536_at | 0.0051   | -0.303 | 9.30E-04   | -0.355 |

---

Transcripts with a P value < 0.001 at either the femoral neck (FN) or lumbar spine (LS) are shown, along with the respective Pearson correlation coefficient (r)

**Supplementary Table 14 Probable BMD-SNP cis eQTLs; Significant correlation between BMD associated SNP genotypes and gene expressions**

| Locus      | SNP        | Allele <sup>a</sup> | Tissue (treatment) <sup>b</sup> | Gender  | Gene             | Probe          | Effect <sup>c</sup> | P value  | P adj <sup>d</sup> | Best SNP <sup>e</sup> | r <sup>2</sup> <sup>f</sup> | Best SNP |                     |
|------------|------------|---------------------|---------------------------------|---------|------------------|----------------|---------------------|----------|--------------------|-----------------------|-----------------------------|----------|---------------------|
|            |            |                     |                                 |         |                  |                |                     |          |                    |                       |                             | Pvalue   | P adj. <sup>g</sup> |
| 1p36.12    | rs6426749  | G                   | Fibroblasts AE                  |         | <i>WNT4</i>      | NM_030761      | -                   | 9.00E-09 | na                 | rs7524102             | 1                           | 2.70E-11 | na                  |
|            | rs6426749  | G                   | Osteoblasts (pge2)              |         | <i>WNT4</i>      | NM_030761.3    | -                   | 2.60E-05 | na                 | rs12742784            | 0.81                        | 1.50E-05 | na                  |
|            | rs6426749  | G                   | Osteoblasts (dex)               |         | <i>WNT4</i>      | NM_030761.3    | -                   | 5.30E-05 | na                 | rs7524102             | 1                           | 2.40E-05 | na                  |
|            | rs7521902  | A                   | Adipose                         | females | <i>WNT4</i>      | Contig30409_RC | -                   | 1.20E-05 | 0.21               | rs12042083            | 0.56                        | 7.50E-06 | 0.12                |
| 2q13       | rs17040773 | C                   | Monocytes                       | mixed   | <i>ANAPC1</i>    | ILMN_1804812   | +                   | 3.60E-10 | na                 | rs17040773            | same SNP                    |          | na                  |
|            | rs17040773 | C                   | Adipose                         | mixed*  | <i>ANAPC1</i>    | NM_022662      | +                   | 1.90E-11 | 0.96               | rs1548189             | 0.96                        | 2.20E-13 | 0.0046              |
|            | rs17040773 | C                   | Fibroblasts AE                  |         | <i>ANAPC1</i>    | NM_022662      | +                   | 7.00E-06 | na                 | rs1548189             | 0.96                        | 2.40E-08 | na                  |
|            | rs17040773 | C                   | Lymphoblasts AE                 | mixed   | <i>ANAPC1</i>    | NM_022662      | +                   | 1.50E-02 | na                 | rs11689168            | 0.95                        | 3.20E-07 | na                  |
| 2q32.2     | rs11675051 | G                   | Osteoblasts (bmp2)              |         | <i>MFSD6</i>     | NM_017694.2    | -                   | 5.40E-11 | na                 | rs4638823             | 0.88                        | 2.10E-11 | na                  |
|            | rs11675051 | G                   | Osteoblasts (pge2)              |         | <i>MFSD6</i>     | NM_017694.2    | -                   | 7.70E-11 | na                 | rs4597559             | 0.88                        | 5.00E-11 | na                  |
|            | rs11675051 | G                   | Osteoblasts (dex)               |         | <i>MFSD6</i>     | NM_017694.2    | -                   | 8.90E-11 | na                 | rs4638823             | 0.88                        | 2.90E-11 | na                  |
|            | rs11675051 | G                   | Osteoblasts (pbs)               |         | <i>MFSD6</i>     | NM_017694.2    | -                   | 9.50E-10 | na                 | rs17801596            | 0.78                        | 8.60E-11 | na                  |
|            | rs11675051 | G                   | Fibroblasts (eth)               |         | <i>MFSD6</i>     | NM_017694.3    | -                   | 9.20E-06 | na                 | rs6756354             | 0.86                        | 1.20E-06 | na                  |
|            | rs11675051 | G                   | Fibroblasts (res)               |         | <i>MFSD6</i>     | NM_017694.3    | -                   | 3.30E-05 | na                 | rs4343493             | 0.88                        | 8.50E-07 | na                  |
|            | rs11675051 | G                   | Fibroblasts (cho)               |         | <i>MFSD6</i>     | NM_017694.3    | -                   | 6.00E-05 | na                 | rs4597559             | 0.88                        | 1.40E-05 | na                  |
|            | rs11675051 | G                   | Fibroblasts (cho)               |         | <i>MFSD6</i>     | NM_017694.3    | -                   | 6.00E-05 | na                 | rs4597559             | 0.88                        | 1.40E-05 | na                  |
| 4q22.1     | rs6532023  | G                   | Adipose                         | mixed   | <i>SPP1</i>      | NM_000582      | -                   | 1.50E-05 | 0.48               | rs1477603             | 0.66                        | 2.80E-06 | 0.06                |
| 6q25.1     | rs4869742  | T                   | Monocytes                       | mixed   | <i>C6orf97</i>   | ILMN_1772588   | +                   | 8.00E-27 | na                 | rs6900089             | 0.19                        | 6.20E-29 | na                  |
| 8q13.3     | rs7017914  | G                   | Whole blood                     | mixed*  | <i>LACTB2</i>    | NM_016027      | +                   | 1.40E-20 | 0.31               | rs13253842            | 0.87                        | 9.60E-21 | 0.19                |
|            | rs7017914  | G                   | Adipose                         | mixed   | <i>LACTB2</i>    | NM_016027      | +                   | 3.10E-05 | 0.36               | rs6994814             | 0.77                        | 4.00E-06 | 0.033               |
|            | rs7017914  | G                   | Lymphoblasts                    | mixed   | <i>LOC340435</i> | XM_291285.1    | +                   | 3.50E-15 | na                 | rs2732090             | 0.97                        | 1.50E-15 | na                  |
|            | rs7017914  | G                   | Lymphoblasts AE                 | mixed   | <i>XKR9</i>      | NM_001011720   | +                   | 1.20E-21 | na                 | rs7013657             | 1                           | 1.10E-22 | na                  |
|            | rs7017914  | G                   | Fibroblasts AE                  |         | <i>XKR9</i>      | NM_001011720   | +                   | 6.90E-18 | na                 | rs13252719            | 1                           | 5.30E-18 | na                  |
| 11p11.2    | rs7932354  | C                   | Adipose                         | mixed*  | <i>ARHGAP1</i>   | NM_004308      | +                   | 1.70E-11 | 0.81               | rs2070852             | 1                           | 1.30E-11 | 0.45                |
|            | rs7932354  | C                   | Adipose                         | females | <i>C11orf49</i>  | Contig32649_RC | +                   | 4.90E-05 | 0.5                | rs6485690             | 0.81                        | 1.30E-05 | 0.091               |
|            | rs7932354  | C                   | Adipose                         | mixed   | <i>LRP4</i>      | AB011540       | +                   | 1.20E-06 | 0.42               | rs1060573             | 0.5                         | 9.60E-09 | 0.0019              |
| 11p14.1_1  | rs10835187 | T                   | Adipose                         | mixed*  | <i>LIN7C</i>     | NM_018362      | -                   | 2.80E-39 | 0.94               | rs3763965             | 0.97                        | 9.00E-43 | 5.10E-04            |
|            | rs10835187 | T                   | Whole blood                     | mixed*  | <i>LIN7C</i>     | NM_018362      | -                   | 8.90E-16 | 0.78               | rs3763965             | 0.97                        | 2.60E-16 | 0.091               |
| 12q23.3    | rs1053051  | T                   | Adipose                         | mixed*  | <i>C12orf23</i>  | NM_152261      | +                   | 4.10E-13 | na                 | rs1053051             | same SNP                    |          | na                  |
|            | rs1053051  | T                   | Whole blood                     | mixed*  | <i>C12orf23</i>  | NM_152261      | +                   | 1.40E-08 | 0.79               | rs7974499             | 0.79                        | 7.40E-10 | 0.02                |
|            | rs1053051  | T                   | Adipose                         | mixed   | <i>MTERFD3</i>   | NM_025198      | +                   | 1.00E-06 | na                 | rs1053051             | same SNP                    |          | na                  |
| 14q32.32   | rs11623869 | T                   | Adipose                         | mixed*  | <i>C14orf172</i> | NM_152307      | +                   | 1.30E-13 | 0.96               | rs2273700             | 0.96                        | 1.90E-14 | 0.064               |
|            | rs11623869 | T                   | Whole blood                     | mixed*  | <i>MARK3</i>     | NM_002376      | -                   | 1.40E-26 | 0.62               | rs3783402             | 0.96                        | 4.00E-27 | 0.13                |
|            | rs11623869 | T                   | Osteoblasts (bmp2)              |         | <i>MARK3</i>     | NM_002376.4    | -                   | 3.90E-04 | na                 | rs879552              | 0.9                         | 4.10E-05 | na                  |
| 16p13.11   | rs4985155  | A                   | Adipose                         | females | <i>KIAA2013</i>  | NM_138346      | +                   | 6.90E-07 | na                 | rs4985155             | same SNP                    |          | na                  |
|            | rs4985155  | A                   | Adipose                         | mixed*  | <i>NTAN1</i>     | NM_173474      | +                   | 1.30E-10 | 0.92               | rs4985148             | 0.82                        | 9.50E-12 | 0.029               |
| 17q21.31_1 | rs227584** | A                   | Monocytes                       | mixed   | <i>C17orf53</i>  | ILMN_1776490   | +                   | 5.30E-11 | na                 | rs11079983            | 0.83                        | 5.80E-14 | na                  |
|            | rs227584** | A                   | Monocytes                       | mixed   | <i>C17orf65</i>  | ILMN_1676731   | +                   | 5.00E-19 | na                 | rs3826412             | same SNP                    |          | na                  |



**Supplementary Table 14 Probable BMD-SNP cis eQTLs; Significant correlation between BMD associated SNP genotypes and gene expressions**

| Locus    | SNP        | Allele <sup>a</sup> | Tissue (treatment) <sup>b</sup> | Gender  | Gene             | Probe       | Effect <sup>c</sup> | P value  | P adj <sup>d</sup> | Best SNP <sup>e</sup> | r2 <sup>f</sup> | Best SNP |                     |
|----------|------------|---------------------|---------------------------------|---------|------------------|-------------|---------------------|----------|--------------------|-----------------------|-----------------|----------|---------------------|
|          |            |                     |                                 |         |                  |             |                     |          |                    |                       |                 | Pvalue   | P adj. <sup>g</sup> |
|          | rs227584   | A                   | Adipose                         | mixed*  | <i>C17orf65</i>  | NM_178542   | +                   | 4.90E-18 | 0.29               | rs721769              | 1               | 1.70E-18 | 0.089               |
|          | rs227584   | A                   | Whole blood                     | mixed   | <i>C17orf65</i>  | NM_178542   | +                   | 4.70E-05 | 0.029              | rs7089                | 0.93            | 3.90E-06 | 0.0021              |
|          | rs227584   | A                   | Lymphoblasts                    | mixed   | <i>C17orf65</i>  | NM_178542.2 | +                   | 1.10E-04 | na                 | rs7089                | 0.92            | 2.00E-05 | na                  |
|          | rs227584   | A                   | Fibroblasts (eth)               |         | <i>TMUB2</i>     | NM_024107.2 | +                   | 4.00E-05 | na                 | rs9910055             | 0.7             | 1.70E-06 | na                  |
|          | rs227584   | A                   | Adipose                         | mixed   | <i>TMUB2</i>     | NM_177441   | +                   | 4.90E-05 | na                 | rs227584              | same SNP        |          | na                  |
|          | rs227584   | A                   | Adipose                         | mixed*  | <i>UBTF</i>      | AF289595    | +                   | 9.00E-09 | 0.51               | rs2071167             | 0.72            | 1.00E-10 | 0.0031              |
| 18q21.33 | rs884205   | A                   | Whole blood                     | females | <i>TNFRSF11A</i> | NM_003839   | -                   | 1.60E-06 | na                 | rs884205              | same SNP        |          | na                  |
|          | rs884205   | A                   | Adipose                         | mixed   | <i>TNFRSF11A</i> | NM_003839   | -                   | 1.70E-04 | 0.63               | rs2957137             | 0.8             | 3.70E-05 | 0.082               |
| 19q13.11 | rs10416218 | T                   | Adipose                         | mixed   | <i>RHPN2</i>     | NM_033103   | +                   | 2.80E-04 | 0.11               | rs9304844             | 0.95            | 4.00E-05 | 0.013               |

Results are shown for SNP eQTLs with P value < 5 x 10<sup>-5</sup> (either for the BMD SNP or the most significantly associated, and highly correlated, SNP) that cannot be explained by other non-correlated SNPs. Transcripts that are located within +/- 500 kb of the top BMD SNPs were included in the analysis. **a** The allele that associates with lowered BMD; **b** The tissue (adipose, whole blood), cell type (monocytes) or cell lines (lymphoblasts, primary human fibroblasts, primary human osteoblasts) analysed and their treatment: cholesterol (cho), resveratrol (res), ethanol (eth), bone morphogenetic protein BMP-2 (bmp2), dexamethasone (dex), prostaglandin E2 (pge2), and control PBS (pbs). Allelic expression analysis in lymphoblastoid cell lines is indicated by AE; **c** Direction of effect of the allele that associates with lowered BMD; **d** P-value of the BMD SNP after conditioning on the best SNP associated with the transcript; **e** SNP with the strongest association with the transcript in the region; **f** Correlation between the BMD SNP and best SNP associated with the transcript; **g** P-value of the best SNP after conditioning on the BMD SNP; \* significant associated SNP correlation also observed for females and/or males for the transcript; \*\* proxy, rs3826412[T], used for expression correlation analysis

**Supplementary Table 15 Non-BMD SNP cis eQTLs; Significant correlation between non-associated SNP genotypes and gene expressions**

| Locus     | SNP         | Allele <sup>a</sup> | Tissue (treatment) <sup>b</sup> | Gender  | Gene             | Probe          | Effect <sup>c</sup> | P value  | P adj <sup>d</sup> | Best SNP <sup>e</sup> | r2 <sup>f</sup> | Best SNP Pvalue | P adj. <sup>g</sup> |
|-----------|-------------|---------------------|---------------------------------|---------|------------------|----------------|---------------------|----------|--------------------|-----------------------|-----------------|-----------------|---------------------|
| 1p31.3    | rs12407028  | C                   | Whole Blood                     | mixed*  | <i>WLS</i>       | NM_024911      | -                   | 1.60E-07 | 1.60E-04           | rs12065581            | 0.07            | 8.50E-51        | 4.90E-47            |
| 1p36.12   | rs6426749   | G                   | Osteoblasts (bmp2)              |         | <i>WNT4</i>      | NM_030761.3    | -                   | 1.50E-04 | na                 | rs17837965            | 0               | 3.10E-05        | na                  |
|           | rs7521902   | A                   | Osteoblasts (dex)               |         | <i>ELA3B</i>     | NM_007352.2    | -                   | 5.00E-05 | na                 | rs16826658            | 0.51            | 3.50E-06        | na                  |
|           | rs7521902   | A                   | Adipose                         | mixed*  | <i>HSPC157</i>   | NM_014179      | -                   | 1.70E-21 | 4.40E-04           | rs3765351             | 0.22            | 1.70E-133       | 9.10E-104           |
|           | rs7521902   | A                   | Whole Blood                     | mixed*  | <i>HSPC157</i>   | NM_014179      | -                   | 2.60E-15 | 0.01               | rs3765351             | 0.22            | 9.10E-94        | 1.70E-75            |
| 2q24.3    | rs1346004   | A                   | Adipose                         | mixed*  | <i>GALNT3</i>    | NM_004482      | -                   | 1.40E-11 | 0.0016             | rs11694833            | 0.03            | 1.10E-38        | 4.10E-29            |
|           | rs1346004   | A                   | Adipose                         | mixed*  | <i>TTC21B</i>    | NM_024753      | +                   | 1.60E-05 | 0.84               | rs9677856             | 0.19            | 2.40E-34        | 3.20E-29            |
| 2q32.2    | rs11675051  | G                   | Lymphoblasts AE                 | mixed   | <i>TMEM194B</i>  | NM_001142645   | +                   | 3.00E-10 | na                 | rs10165399            | 0.43            | 5.70E-12        | na                  |
| 6p21.1    | rs11755164  | T                   | Adipose                         | mixed*  | <i>SUPT3H</i>    | NM_003599      | +                   | 4.60E-14 | 0.0082             | rs2396373             | 0.27            | 1.20E-19        | 4.00E-08            |
|           | rs11755164  | T                   | Whole Blood                     | mixed*  | <i>SUPT3H</i>    | NM_003599      | +                   | 2.50E-06 | 0.53               | rs9349303             | 0.3             | 9.10E-17        | 1.40E-11            |
|           | rs4869742   | T                   | Whole Blood                     | mixed*  | <i>C6orf97</i>   | NM_025059      | +                   | 2.80E-08 | 6.20E-05           | rs852003              | 0.04            | 2.60E-15        | 6.20E-12            |
|           | rs7751941   | A                   | Adipose                         | mixed*  | <i>C6orf97</i>   | NM_025059      | +                   | 1.00E-05 | 0.51               | rs7776340             | 0.33            | 4.40E-13        | 1.40E-08            |
|           | rs7751941   | A                   | Whole Blood                     | mixed*  | <i>C6orf97</i>   | NM_025059      | +                   | 1.50E-05 | 0.48               | rs852003              | 0.24            | 2.60E-15        | 4.60E-11            |
| 7q31.31   | rs3801387   | A                   | Adipose                         | females | <i>WNT16</i>     | NM_016087      | -                   | 9.00E-06 | 0.35               | rs10231005            | 0.27            | 1.60E-10        | 5.20E-06            |
|           | rs13245690  | G                   | Adipose                         | mixed*  | <i>C7orf58</i>   | NM_024913      | -                   | 4.00E-10 | 0.53               | rs2222543             | 0.37            | 1.80E-27        | 9.50E-18            |
| 8q13.3    | rs7017914** | G                   | Monocytes                       | mixed   | <i>LACTB2</i>    | ILMN_1660635   | -                   | 9.40E-28 | na                 | rs13271014            | 0.1             | 3.80E-104       | na                  |
| 10q24.2   | rs7084921** | T                   | Monocytes                       | mixed   | <i>CWF19L1</i>   | ILMN_1651886   | -                   | 8.80E-14 | na                 | rs11597086            | 0.39            | 8.20E-50        | na                  |
|           | rs7084921   | C                   | Adipose                         | mixed*  | <i>CWF19L1</i>   | NM_018294      | -                   | 1.90E-22 | 0.64               | rs11597086            | 0.38            | 2.50E-68        | 1.40E-40            |
|           | rs7084921   | C                   | Whole Blood                     | mixed   | <i>CWF19L1</i>   | NM_018294      | -                   | 2.90E-07 | 0.4                | rs11597086            | 0.38            | 3.00E-22        | 5.10E-16            |
|           | rs7084921   | C                   | Fibroblasts (cho)               |         | <i>CWF19L1</i>   | NM_018294.3    | -                   | 1.50E-05 | na                 | rs4462272             | 0.65            | 3.30E-09        | na                  |
| 11p14.1_2 | rs163879    | T                   | Whole Blood                     | mixed   | <i>DCDC5</i>     | AB040926       | +                   | 1.80E-05 | 0.55               | rs2122681             | 0.13            | 9.80E-19        | 2.10E-14            |
| 11q13.2   | rs3736228   | T                   | Adipose                         | mixed*  | <i>SAPS3</i>     | Contig52814_RC | +                   | 7.30E-11 | 0.54               | rs10896337            | 0.43            | 1.90E-32        | 1.40E-21            |
|           | rs3736228   | T                   | Whole Blood                     | mixed   | <i>SAPS3</i>     | Contig52814_RC | +                   | 2.40E-08 | 0.4                | rs10896339            | 0.42            | 3.70E-25        | 9.80E-18            |
|           | rs3736228   | T                   | Adipose                         | mixed   | <i>SAPS3</i>     | NM_018312      | +                   | 8.00E-07 | 0.12               | rs10896347            | 0.47            | 1.90E-08        | 0.0022              |
| 12q13.12  | rs12821008  | C                   | Whole Blood                     | mixed*  | <i>CCDC65</i>    | NM_033124      | -                   | 3.10E-08 | 0.29               | rs1054376             | 0.05            | 3.30E-91        | 4.60E-81            |
| 12q23.3   | rs1053051   | T                   | Whole Blood                     | mixed*  | <i>AKO55712</i>  | Contig10844_RC | +                   | 9.00E-06 | 0.045              | rs10746071            | 0.78            | 1.30E-10        | 5.80E-07            |
|           | rs1053051   | T                   | Adipose                         | mixed*  | <i>AKO55712</i>  | Contig10844_RC | +                   | 2.70E-13 | 0.2                | rs10778515            | 0.6             | 3.20E-16        | 2.20E-04            |
| 13q14.11  | rs9533090   | T                   | Whole Blood                     | mixed*  | <i>AKAP11</i>    | NM_144490      | +                   | 7.30E-06 | 0.15               | rs3783192             | 0.22            | 1.70E-19        | 4.20E-15            |
|           | rs9533090   | T                   | Adipose                         | mixed   | <i>AKAP11</i>    | NM_144490      | +                   | 6.60E-07 | 0.15               | rs7318683             | 0.18            | 1.40E-31        | 1.50E-25            |
|           | rs7326472   | A                   | Adipose                         | mixed   | <i>AKAP11</i>    | NM_144490      | +                   | 1.50E-06 | 0.0075             | rs7318683             | 0.06            | 1.40E-31        | 2.70E-27            |
| 14q32.32  | rs11623869* | G                   | Monocytes                       | mixed   | <i>BAG5</i>      | ILMN_2361695   | -                   | 2.70E-12 | na                 | rs7148456             | 0.18            | 9.60E-24        | na                  |
|           | rs11623869* | G                   | Monocytes                       | mixed   | <i>MARK3</i>     | ILMN_1704795   | -                   | 2.10E-08 | na                 | rs975892              | 0.15            | 2.10E-38        | na                  |
|           | rs11623869  | T                   | Whole Blood                     | mixed   | <i>BAG5</i>      | NM_004873      | +                   | 6.00E-06 | 0.23               | rs752624              | 0.14            | 3.50E-17        | 1.20E-12            |
|           | rs11623869  | T                   | Adipose                         | mixed*  | <i>C14orf153</i> | NM_032374      | +                   | 2.10E-07 | 1.40E-02           | rs2403197             | 0.19            | 3.50E-14        | 2.80E-09            |
|           | rs11623869  | T                   | Whole Blood                     | mixed*  | <i>KLC1</i>      | NM_005552      | -                   | 3.90E-05 | 0.32               | rs3212090             | 0.22            | 3.90E-22        | 3.20E-18            |
|           | rs11623869  | T                   | Adipose                         | mixed*  | <i>MARK3</i>     | Contig43834_RC | -                   | 2.10E-47 | 2.30E-07           | rs4906319             | 0.15            | 1.90E-147       | 6.60E-89            |
|           | rs11623869  | T                   | Whole Blood                     | mixed*  | <i>MARK3</i>     | Contig43834_RC | -                   | 1.10E-68 | 2.60E-15           | rs6575982             | 0.15            | 1.30E-147       | 7.60E-80            |
|           | rs11623869  | T                   | Lymphoblasts AE                 | mixed   | <i>BAG5</i>      | NM_001015049   | -                   | 3.30E-06 | na                 | rs942863              | 0.56            | 1.20E-08        | na                  |

**Supplementary Table 15 Non-BMD SNP cis eQTLs; Significant correlation between non-associated SNP genotypes and gene expressions**

| Locus      | SNP        | Allele <sup>a</sup> | Tissue (treatment) <sup>b</sup> | Gender  | Gene           | Probe        | Effect <sup>c</sup> | P value  | P adj <sup>d</sup> | Best SNP <sup>e</sup> | r2 <sup>f</sup> | Best SNP Pvalue | P adj. <sup>g</sup> |
|------------|------------|---------------------|---------------------------------|---------|----------------|--------------|---------------------|----------|--------------------|-----------------------|-----------------|-----------------|---------------------|
| 16p13.11   | rs4985155  | A                   | Adipose                         | females | <i>PDXDC1</i>  | D87438       | -                   | 2.20E-05 | 0.48               | rs1136001             | 0.78            | 5.20E-07        | 0.0072              |
| 16p13.3_1  | rs9921222  | T                   | Monocytes                       | mixed   | <i>AXIN1</i>   | ILMN_1766185 | -                   | 1.10E-14 | na                 | rs1204042             | 0.07            | 5.40E-114       | na                  |
|            | rs9921222  | T                   | Monocytes                       | mixed   | <i>NME4</i>    | ILMN_1800634 | +                   | 3.90E-23 | na                 | rs763151              | 0.14            | 3.20E-204       | na                  |
|            | rs9921222  | T                   | Monocytes                       | mixed   | <i>TMEM8</i>   | ILMN_1741371 | -                   | 7.90E-08 | na                 | rs3830160             | 0.18            | 2.80E-80        | na                  |
|            | rs9921222  | T                   | Adipose                         | mixed*  | <i>AXIN1</i>   | NM_181050    | -                   | 1.80E-06 | 0.12               | rs214252              | 0.11            | 2.90E-22        | 3.80E-17            |
|            | rs9921222  | T                   | Osteoblasts (dex)               |         | <i>DECR2</i>   | NM_020664.3  | +                   | 5.80E-06 | na                 | rs1698231             | 0.1             | 1.60E-10        | na                  |
| 17p13.3    | rs4790881  | C                   | Whole Blood                     | mixed*  | <i>SRR</i>     | NM_021947    | +                   | 8.40E-09 | 0.37               | rs17834563            | 0.06            | 4.60E-71        | 5.50E-61            |
| 17q21.31_1 | rs4792909  | G                   | Adipose                         | mixed*  | <i>MPP3</i>    | NM_001932    | +                   | 6.30E-15 | 0.92               | rs17674998            | 0.14            | 4.20E-60        | 4.60E-42            |
| 19q13.11   | rs10416218 | T                   | Adipose                         | mixed*  | <i>GPATCH1</i> | NM_018025    | -                   | 4.20E-19 | 0.16               | rs7256470             | 0.66            | 1.60E-22        | 8.50E-05            |
|            | rs10416218 | T                   | Adipose                         | mixed*  | <i>WDR88</i>   | NM_173479    | -                   | 1.40E-06 | 0.12               | rs10423969            | 0.52            | 6.70E-16        | 6.80E-11            |
| 20p12.2    | rs3790160  | C                   | Whole Blood                     | mixed   | <i>JAG1</i>    | NM_000214    | -                   | 2.60E-05 | 0.073              | rs6077861             | 0.22            | 3.50E-09        | 8.20E-06            |

Results are shown for SNP eQTLs with P value < 5 x 10<sup>-5</sup> that can be explained by other non-correlated and non-associated SNPs. Transcripts that are located within +/- 500 kb of the top BMD SNPs were included in the analysis. **a** The allele that associates with lowered BMD; **b** The tissue (adipose, whole blood), cell type (monocytes) or cell lines (lymphoblasts, primary human fibroblasts, primary human osteoblasts) analysed and their treatment: cholesterol (cho), resveratrol (res), ethanol (eth), bone morphogenetic protein BMP-2 (bmp2), dexamethasone (dex), prostaglandin E2 (pge2), and control PBS (pbs). Allelic expression analysis in lymphoblastoid cell lines is indicated by AE; **c** Direction of effect of the allele that associates with lowered BMD; **d** P-value of the BMD SNP after conditioning on the best SNP associated with the transcript; **e** SNP with the strongest association with the transcript in the region; **f** Correlation between the BMD SNP and best SNP associated with the transcript; **g** P-value of the best SNP after conditioning on the BMD SNP; \* significant associated SNP correlation also observed for females and/or males for the transcript; \*\* proxy SNPs used for expression correlation analysis: rs12675271 for rs7017914, rs11190378 for rs7084921, and rs17679475 for rs11623869.

**Supplementary Table 16.** Candidate Genes selected by GRAIL

| SNP        | Grail SNP P-value | Candidate Gene          |
|------------|-------------------|-------------------------|
| rs3736228  | <b>2.80E-10</b>   | <b><i>LRP5</i></b>      |
| rs2062377  | <b>3.17E-07</b>   | <b><i>TNFRSF11B</i></b> |
| rs2016266  | <b>3.55E-07</b>   | <b><i>SP7</i></b>       |
| rs11755164 | <b>3.59E-07</b>   | <b><i>RUNX2</i></b>     |
| rs9533090  | <b>4.14E-07</b>   | <b><i>TNFSF11</i></b>   |
| rs6426749  | <b>8.04E-07</b>   | <b><i>WNT4</i></b>      |
| rs884205   | <b>8.99E-07</b>   | <b><i>TNFRSF11A</i></b> |
| rs2887571  | <b>1.48E-05</b>   | <b><i>WNT5B</i></b>     |
| rs7217932  | <b>2.04E-05</b>   | <b><i>SOX9</i></b>      |
| rs6532023  | <b>2.17E-05</b>   | <b><i>MEPE</i></b>      |
| rs3801387  | <b>3.66E-05</b>   | <b><i>WNT16</i></b>     |
| rs9921222  | <b>4.04E-05</b>   | <b><i>AXIN1</i></b>     |
| rs1864325  | <b>4.35E-05</b>   | <b><i>WNT3</i></b>      |
| rs6959212  | <b>1.50E-04</b>   | <b><i>SFRP4</i></b>     |
| rs7953528  | <b>3.27E-04</b>   | <b><i>PTHLH</i></b>     |
| rs430727   | <b>3.57E-04</b>   | <b><i>CTNNB1</i></b>    |
| rs10048146 | <b>8.76E-04</b>   | <b><i>FOXL1</i></b>     |
| rs7108738  | <b>9.00E-03</b>   | <b><i>SOX6</i></b>      |
| rs12821008 | 0.02              | <i>DHH</i>              |
| rs13336428 | 0.02              | <i>CLCN7</i>            |
| rs9466056  | 0.02              | <i>SOX4</i>             |
| rs1366594  | 0.05              | <i>MEF2C</i>            |
| rs7017914  | 0.08              | <i>LACTB2</i>           |
| rs3790160  | 0.08              | <i>JAG1</i>             |
| rs3905706  | 0.12              | <i>MPP7</i>             |
| rs4869742  | 0.15              | <i>C6orf97</i>          |
| rs7932354  | 0.17              | <i>DGKZ</i>             |
| rs10416218 | 0.17              | <i>GPATCH1</i>          |
| rs479336   | 0.18              | <i>DNM3</i>             |
| rs3755955  | 0.22              | <i>DGKQ</i>             |
| rs12407028 | 0.22              | <i>GPR177</i>           |
| rs7851693  | 0.23              | <i>FUBP3</i>            |
| rs4233949  | 0.24              | <i>SPTBN1</i>           |
| rs7084921  | 0.26              | <i>CHUK</i>             |
| rs1566045  | 0.31              | <i>CYLD</i>             |
| rs17040773 | 0.42              | <i>ANAPC1</i>           |
| rs1026364  | 0.44              | <i>NAT13</i>            |
| rs1878526  | 0.46              | <i>INSIG2</i>           |
| rs13204965 | 0.49              | <i>C6orf173</i>         |
| rs11623869 | 0.50              | <i>MARK3</i>            |
| rs4727338  | 0.54              | <i>SLC25A13</i>         |
| rs4796995  | 0.60              | <i>C18orf19</i>         |
| rs10835187 | 0.61              | <i>LIN7C</i>            |
| rs163879   | 0.72              | <i>DCDC1</i>            |
| rs4790881  | 0.73              | <i>MNT</i>              |
| rs4985155  | 0.76              | <i>PDXDC1</i>           |
| rs1373004  | 0.76              | <i>MBL2</i>             |
| rs227584   | 0.78              | <i>HDAC5</i>            |
| rs7812088  | 0.83              | <i>ABCF2</i>            |
| rs1053051  | 0.85              | <i>C12orf23</i>         |
| rs344081   | 0.87              | <i>TIPARP</i>           |
| rs7071206  | 0.87              | <i>KCNMA1</i>           |
| rs1346004  | 0.89              | <i>FAM130A2</i>         |
| rs1286083  | 0.91              | <i>RPS6KA5</i>          |
| rs7584262  | 0.95              | <i>LOC91461</i>         |

---

Boldface indicates significant relationships amongst loci (GRAIL P < 0.01)

**Supplementary Table 17** Functional and biological evidence for genes underlying the GWAS loci

| Locus     | SNP               | MAF  | Candidate gene | Closest gene | eQTL         | Knockout mouse with skeletal phenotype (MGI) | Monogenic syndrome with skeletal phenotype (OMIM) | LD functional variant(s) 1000 Genome Project | GRAIL Priority | Bone-active pathway       | Score |
|-----------|-------------------|------|----------------|--------------|--------------|----------------------------------------------|---------------------------------------------------|----------------------------------------------|----------------|---------------------------|-------|
| 1p31.3    | rs12407028        | 0.39 | WLS            | YES          |              | MGI:1915401                                  |                                                   |                                              |                | Wnt                       | 3     |
| 1p36.12   | rs6426749         | 0.17 | ZBTB40         | YES          |              |                                              |                                                   |                                              |                |                           | 1     |
| 1p36.12   | rs7521902         | 0.31 | WNT4           | YES          | NM_030761    |                                              |                                                   | YES                                          |                | Wnt                       | 4     |
| 1q24.3    | <b>rs479336</b>   | 0.26 | DNM3           | YES          |              |                                              |                                                   |                                              |                |                           | 1     |
| 2p16.2    | rs4233949         | 0.38 | SPTBN1         | YES          |              |                                              |                                                   | rs4305309                                    |                |                           | 2     |
| 2p21      | <b>rs7584262</b>  | 0.23 | PKDCC          | YES          |              | MGI:2147077                                  |                                                   |                                              |                |                           | 2     |
| 2q13      | <b>rs17040773</b> | 0.23 | ANAPC1         | YES          | ILMN_1804812 |                                              |                                                   |                                              |                |                           | 2     |
| 2q14.2    | <b>rs1878526</b>  | 0.22 | INSIG2         | YES          |              |                                              |                                                   |                                              |                |                           | 1     |
| 2q24.3    | rs1346004         | 0.49 | GALNT3         | YES          |              | MGI:894695                                   | MIM:211900                                        |                                              |                |                           | 3     |
| 3p22.1    | rs430727          | 0.47 | CTNNB1         | YES          |              | MGI:88276                                    |                                                   | YES                                          |                | Wnt                       | 4     |
| 3q13.2    | <b>rs1026364</b>  | 0.36 | KIAA2018       | YES          |              |                                              |                                                   |                                              |                |                           | 2     |
| 3q25.31   | <b>rs344081</b>   | 0.13 | LEKR1          | YES          |              |                                              |                                                   | rs9813630                                    |                |                           | 1     |
| 4p16.3    | <b>rs3755955</b>  | 0.16 | IDUA           | YES          |              | MGI:96418                                    |                                                   | rs6848974                                    |                |                           | 3     |
| 4q22.1    | rs6532023         | 0.34 | MEPE           | YES          |              | MGI:2137384                                  |                                                   |                                              |                |                           | 2     |
| 4q22.1    | rs6532023         | 0.34 | SPP1           |              | NM_000582    | MGI:98389                                    |                                                   | YES                                          |                | Endochondral Ossification | 4     |
| 4q22.1    | rs6532023         | 0.34 | IBSP           |              |              | MGI:96389                                    |                                                   |                                              |                |                           | 1     |
| 5q14.3    | rs1366594         | 0.47 | MEF2C          | YES          |              |                                              |                                                   |                                              |                | Endochondral Ossification | 2     |
| 6p21.1    | <b>rs11755164</b> | 0.40 | RUNX2          |              |              | MGI:99829                                    |                                                   | YES                                          |                | Endochondral Ossification | 3     |
| 6p22.3    | <b>rs9466056</b>  | 0.38 | SOX4           |              |              |                                              |                                                   |                                              |                |                           | 0     |
| 6q22.32   | rs13204965        | 0.24 | RSPO3          | YES          |              | MGI:1920030                                  |                                                   |                                              |                | Wnt                       | 3     |
| 6q25.1    | rs4869742         | 0.32 | ESR1           |              |              | MGI:1352467                                  |                                                   |                                              |                |                           | 1     |
| 7p14.1    | rs10226308        | 0.16 | SFRP4          |              |              |                                              |                                                   | YES                                          |                | Wnt                       | 2     |
| 7p14.1    | rs6959212         | 0.34 | STAR3NL        | YES          |              |                                              |                                                   |                                              |                |                           | 1     |
| 7q21.3    | rs4727338         | 0.33 | SLC25A13       | YES          |              |                                              |                                                   |                                              |                |                           | 1     |
| 7q31.31   | <b>rs3801387</b>  | 0.26 | WNT16          | YES          |              |                                              |                                                   | rs3779381                                    | YES            | Wnt                       | 4     |
| 7q36.1    | <b>rs7812088</b>  | 0.12 | ABCF2          | YES          |              |                                              |                                                   |                                              |                |                           | 1     |
| 8q13.3    | <b>rs7017914</b>  | 0.49 | LACTB2         |              | NM_016027    |                                              |                                                   | rs13271442                                   |                |                           | 2     |
| 8q24.12   | rs2062377         | 0.41 | TNFRSF11B      | YES          |              | MGI:109587                                   | MIM:602080                                        | YES                                          |                | OPG/RANK/RANKL            | 5     |
| 9q34.11   | <b>rs7851693</b>  | 0.37 | FUBP3          | YES          |              |                                              |                                                   |                                              |                |                           | 1     |
| 10p11.23  | <b>rs3905706</b>  | 0.23 | MPP7           | YES          |              |                                              |                                                   |                                              |                |                           | 1     |
| 10q21.1   | <b>rs1373004</b>  | 0.12 | DKK1           |              |              | MGI:1329040                                  |                                                   |                                              |                | Wnt                       | 2     |
| 10q22.3_1 | <b>rs7071206</b>  | 0.24 | KCNMA1         | YES          |              |                                              |                                                   |                                              |                |                           | 1     |
| 10q24.2   | <b>rs7084921</b>  | 0.40 | CPN1           | YES          |              |                                              |                                                   |                                              |                |                           | 1     |
| 11p11.2   | rs7932354         | 0.33 | LRP4           |              | AB011540     | MGI:2442252                                  | MIM:604270                                        |                                              |                |                           | 3     |
| 11p14.1_1 | <b>rs10835187</b> | 0.46 | LIN7C          | YES          | NM_018362    |                                              |                                                   |                                              |                |                           | 2     |
| 11p14.1_2 | rs163879          | 0.34 | DCDC5          | YES          |              |                                              |                                                   |                                              |                |                           | 1     |
| 11p15.2   | rs7108738         | 0.18 | SOX6           | YES          |              | MGI:98368                                    |                                                   | YES                                          |                | Endochondral Ossification | 4     |
| 11q13.2   | rs3736228         | 0.15 | LRP5           | YES          |              | MGI:1278315                                  | MIM:259770,MIM:607634                             | rs3736228                                    | YES            | Wnt                       | 6     |
| 12p11.22  | <b>rs7953528</b>  | 0.18 | PTHLH          |              |              | MGI:97800                                    | MIM:613382                                        |                                              | YES            | Endochondral Ossification | 4     |
| 12p13.33  | <b>rs2887571</b>  | 0.24 | WNT5B          |              |              |                                              |                                                   |                                              | YES            | Wnt                       | 2     |
| 12q13.12  | <b>rs12821008</b> | 0.40 | DHH            | YES          |              |                                              |                                                   |                                              |                | Hedgehog                  | 2     |
| 12q13.13  | rs2016266         | 0.31 | SP7            | YES          |              | MGI:2153568                                  | MIM:613849                                        |                                              | YES            | MSC differentiation       | 5     |
| 12q13.13  | rs736825          | 0.44 | HOXC6          | YES          |              | MGI:96197                                    |                                                   |                                              |                | Wnt                       | 3     |
| 12q23.3   | <b>rs1053051</b>  | 0.49 | C12orf23       | YES          | NM_152261    |                                              |                                                   |                                              |                |                           | 2     |
| 13q14.11  | rs9533090         | 0.48 | TNFSF11        |              |              | MGI:1100089                                  | MIM:259710                                        | YES                                          |                | OPG/RANK/RANKL            | 4     |
| 14q32.12  | <b>rs1286083</b>  | 0.20 | RPS6KA5        | YES          |              |                                              |                                                   |                                              |                |                           | 1     |
| 14q32.32  | rs11623869        | 0.34 | MARK3          | YES          | NM_002376    |                                              |                                                   | rs2273699                                    |                |                           | 3     |

**Supplementary Table 17** Functional and biological evidence for genes underlying the GWAS loci

| Locus      | SNP               | MAF  | Candidate gene   | Closest gene | eQTL         | Knockout mouse with skeletal phenotype (MGI) | Monogenic syndrome with skeletal phenotype (OMIM) | LD functional variant(s) 1000 Genome Project | GRAIL Priority | Bone-active pathway       | Score |
|------------|-------------------|------|------------------|--------------|--------------|----------------------------------------------|---------------------------------------------------|----------------------------------------------|----------------|---------------------------|-------|
| 16p13.11   | <b>rs4985155</b>  | 0.35 | <i>NTAN1</i>     | YES          | NM_173474    |                                              |                                                   | rs1136001                                    |                |                           | 3     |
| 16p13.3_1  | <b>rs9921222</b>  | 0.46 | <i>AXIN1</i>     | YES          |              | MGI:1096327                                  |                                                   |                                              | YES            | Wnt                       | 4     |
| 16p13.3_2  | <b>rs13336428</b> | 0.44 | <i>CLCN7</i>     |              |              | MGI:1347048                                  | MIM:611490                                        |                                              |                |                           | 2     |
| 16q12.1    | <b>rs1566045</b>  | 0.20 | <i>CYLD</i>      |              |              | MGI:1921506                                  |                                                   |                                              |                |                           | 1     |
| 16q24.1    | rs10048146        | 0.20 | <i>FOXL1</i>     | YES          |              | MGI:1347481                                  |                                                   |                                              | YES            | TGF-beta                  | 4     |
| 17p13.3    | <b>rs4790881</b>  | 0.33 | <i>SMG6</i>      | YES          |              |                                              |                                                   |                                              |                |                           | 1     |
| 17q21.31_1 | rs227584          | 0.33 | <i>C17orf53</i>  |              | ILMN_1776490 |                                              |                                                   | rs227584                                     |                |                           | 2     |
| 17q21.31_1 | rs4792909         | 0.37 | <i>SOST</i>      | YES          |              | MGI:1921749                                  | MIM:269500                                        |                                              |                | Wnt                       | 4     |
| 17q21.31_2 | rs1864325         | 0.22 | <i>WNT3</i>      |              |              |                                              | MIM:273395                                        |                                              | YES            | Wnt                       | 3     |
| 17q24.3    | <b>rs7217932</b>  | 0.46 | <i>SOX9</i>      | YES          |              | MGI:98371                                    | MIM:608160                                        |                                              | YES            | Endochondral Ossification | 5     |
| 18p11.21   | <b>rs4796995</b>  | 0.39 | <i>C18orf19</i>  | YES          |              |                                              |                                                   |                                              |                |                           | 1     |
| 18q21.33   | rs884205          | 0.25 | <i>TNFRSF11A</i> | YES          | NM_003839    | MGI:1314891                                  | MIM:602080                                        |                                              | YES            | OPG/RANK/RANKL            | 6     |
| 19q13.11   | <b>rs10416218</b> | 0.28 | <i>GPATCH1</i>   | YES          |              |                                              |                                                   | rs2287679                                    |                |                           | 2     |
| 20p12.2    | rs3790160         | 0.50 | <i>JAG1</i>      | YES          |              |                                              |                                                   |                                              |                |                           | 1     |
| Xp22.31    | <b>rs5934507</b>  | 0.27 | <i>FAM9B</i>     | YES          |              |                                              |                                                   |                                              |                |                           | 1     |

Aggregated evidence derived from human (OMIM) and mouse genetic (MGI) databases with that derived from our data (gene proximity to the associated variant, eQTL, LD with putative functional variants and pathway involvement). We prioritized 60 candidate genes likely to be underlying the GWAS signals coming from the 56 BMD loci together with a score on potential biological relevance. Of these 60 genes, 13 contained human mutations associated with monogenic skeletal syndromes while 27 genes had a knock-out mouse presenting with skeletal defects (11 genes had both). 10 of the 26 genes contained functional variants in LD with the GWAS SNP, 11 of the 14 genes contained eQTL transcripts, 18 genes annotated in the GRAIL analysis and 24 genes are members of a recognized biologic pathway relevant to bone biology. Boldface indicates novel loci. eQTL and markers in LD with a putative functional variant are only shown for those related to the reported candidate gene in this table. For eQTLs the transcript associated with the given SNP is displayed. The score was generated by adding a point for each line of evidence (range 0-6).

Supplementary Table 18A: Study design

Stage 1: GWAS BMD Discovery

| Study      |               |                                                     |                            | Sample QC                        |                                        |                                                                                                                |                                     |                  | Total sample size with GWA and BMD and/or fracture data available                                                                                                                                                                                                                              | Short Study Description | References                                                                                                                                                                                                                                                                                                                                                                                                                                                                                                                                                                                                |                                                                                                                                                                                                                                                                                                                          |
|------------|---------------|-----------------------------------------------------|----------------------------|----------------------------------|----------------------------------------|----------------------------------------------------------------------------------------------------------------|-------------------------------------|------------------|------------------------------------------------------------------------------------------------------------------------------------------------------------------------------------------------------------------------------------------------------------------------------------------------|-------------------------|-----------------------------------------------------------------------------------------------------------------------------------------------------------------------------------------------------------------------------------------------------------------------------------------------------------------------------------------------------------------------------------------------------------------------------------------------------------------------------------------------------------------------------------------------------------------------------------------------------------|--------------------------------------------------------------------------------------------------------------------------------------------------------------------------------------------------------------------------------------------------------------------------------------------------------------------------|
| Short name | Full name     | Study design                                        | Study base                 | Country of origin                | City/region of origin                  | Ethnicity (es)                                                                                                 | Call rate                           | Other exclusions |                                                                                                                                                                                                                                                                                                |                         |                                                                                                                                                                                                                                                                                                                                                                                                                                                                                                                                                                                                           |                                                                                                                                                                                                                                                                                                                          |
| 1          | <b>AFOS</b>   | Amish Family Osteoporosis Study                     | Cohort/ Founder population | Population-based                 | United States of America               | Lancaster County, Pennsylvania                                                                                 | Old Order Amish (European Ancestry) | > 98%            | 1) missing covariate data;<br>2) genotype data not imputed at time of analysis.                                                                                                                                                                                                                | 918                     | The AFOS study was designed to identify genetic determinants of osteoporosis in the Old Order Amish (OOA) population from Lancaster County, PA USA. The OOA population is a closed, Caucasian founder population made up of large families and the OOA population lives a relatively homogenous lifestyle.                                                                                                                                                                                                                                                                                                | [PMID:14969401] (Streeten, 2004 Reduced incidence of hip fracture in the Old Order Amish); [PMID:16939402] (Streeten, 2006 Quantitative trait loci for BMD identified by autosome-wide linkage scan to chromosomes 7q and 21q in men from the Amish Family Osteoporosis Study)                                           |
| 2          | <b>AOGC</b>   | Anglo-Australasian Osteoporosis Genetics Consortium | Extreme truncate selection | Population-based, clinical-based | Australia, New Zealand, United Kingdom | Brisbane, Sydney, Dubbo, Perth, Melbourne, Geelong, Hobart, Sheffield, Kiel, Paris, Berlin, Aberdeen, Hereford | North-western European              | > 98%            | 1) missing DNA;<br>2) gender mismatch with typed X-linked markers;<br>3) excess autosomal heterozygosity<br>4) duplicates and/or 1st or 2nd degree relatives<br>5) ethnic outliers<br>6) missing body weight and height.                                                                       | 1,955                   | A consortium of investigators who have collected unrelated individuals with extreme BMD phenotypes (z scores +1.5 to +4; or -1.5 to -4) as a powerful strategy for gene discovery in quantitative traits.                                                                                                                                                                                                                                                                                                                                                                                                 | [PMID: 18021006] (Sims, 2008 Genetic analyses in a sample of individuals with high or low BMD shows association with multiple Wnt pathway genes); [PMID: 21533022] (Duncan, 2011 Genome-wide association study using extreme truncate selection identifies novel genes affecting bone mineral density and fracture risk) |
| 3          | <b>CHS</b>    | Cardiovascular Health Study                         | Cohort                     | Population-based                 | United States of America               | Sacramento, Pittsburgh                                                                                         | European American                   | > 95%            | 1) presence at study baseline of coronary heart disease, congestive heart failure, peripheral vascular disease, valvular heart disease, stroke or transient ischemic attack;<br>2) missing DNA;<br>3) non-Caucasian ethnicity;<br>4) gender mismatch;<br>5) discordance with prior genotyping. | 3,291                   | A population-based cohort study of risk factors for coronary heart disease and stroke in adults ≥65 years conducted across four field centers. The original predominantly Caucasian cohort was recruited in 1989-1990 from random samples of the Medicare eligibility lists, genotyping was performed at the General Clinical Research Center's Phenotyping/Genotyping Laboratory at Cedars-Sinai using the Illumina 370CNV BeadChip system on 3980 CHS participants who were free of CVD at baseline, consented to genetic testing, and had DNA available for genotyping.                                | [PMID: 20031568] (Fried, 2009 Cohorts for Heart and Aging Research in Genomic Epidemiology (CHARGE) Consortium: Design of prospective meta-analyses of genome-wide association studies from 5 cohorts)                                                                                                                   |
| 4          | <b>DeCODE</b> | DeCODE Genetics Study                               | Cross-sectional            | Population-based, clinical-based | Iceland                                | NA                                                                                                             | North-western European              | ≥91%             | 1) missing BMD measurement;<br>2) missing body weight and height.                                                                                                                                                                                                                              | 7,605                   | The study includes 40,000 individuals taking part in various disease projects                                                                                                                                                                                                                                                                                                                                                                                                                                                                                                                             | [PMID: 18445777] (Styrkarsdottir, 2008 Multiple genetic loci for bone mineral density and fractures); [PMID: 19079262] (Styrkarsdottir, 2009 Multiple genetic loci for bone mineral density and fractures)                                                                                                               |
| 5          | <b>ERF</b>    | Erasmus Rucphen Family                              | Cohort                     | Family-based isolate             | The Netherlands                        | Rucphen                                                                                                        | North-western European              | > 95%            | 1) gender mismatch;<br>2) ethnic outliers;<br>3) Missing phenotype data;<br>4) high IBS;<br>5) excess heterozygosity.                                                                                                                                                                          | 1,602                   | A family-based cohort study that is embedded in the Genetic Research in Isolated Populations (GRIP) program in the South West of the Netherlands. The aim of this program was to identify genetic risk factors in the development of complex disorders. For the ERF study, 22 families that had at least five children baptized in the community church between 1850-1900 were identified with the help of genealogical records. All living descendants of these couples and their spouses were invited to take part in the study. Data collection started in June 2002 and was finished in February 2005 | [PMID: 15054401] (Aulchenko, 2004 Linkage disequilibrium in young genetically isolated Dutch population)                                                                                                                                                                                                                 |

Supplementary Table 18A: Study design

Stage 1: GWAS BMD Discovery

| Study      |           |                                                               |              | Sample QC                        |                          |                             |                                |                  | Total sample size with GWA and BMD and/or fracture data available                                                                                                                                                                                                      | Short Study Description | References                                                                                                                                                                                                                                                                                                               |                                                                                                                                                                                                                                                                                                                                                                                                                                                                                                                                                                                                                |
|------------|-----------|---------------------------------------------------------------|--------------|----------------------------------|--------------------------|-----------------------------|--------------------------------|------------------|------------------------------------------------------------------------------------------------------------------------------------------------------------------------------------------------------------------------------------------------------------------------|-------------------------|--------------------------------------------------------------------------------------------------------------------------------------------------------------------------------------------------------------------------------------------------------------------------------------------------------------------------|----------------------------------------------------------------------------------------------------------------------------------------------------------------------------------------------------------------------------------------------------------------------------------------------------------------------------------------------------------------------------------------------------------------------------------------------------------------------------------------------------------------------------------------------------------------------------------------------------------------|
| Short name | Full name | Study design                                                  | Study base   | Country of origin                | City/region of origin    | Ethnicity (es)              | Call rate                      | Other exclusions |                                                                                                                                                                                                                                                                        |                         |                                                                                                                                                                                                                                                                                                                          |                                                                                                                                                                                                                                                                                                                                                                                                                                                                                                                                                                                                                |
| 6          | EPICNOR   | European Prospective Investigation into Cancer, Norfolk study | Cohort       | Population-based                 | United Kingdom           | Norfolk                     | European                       | ≥ 97.7%          | 1) missing DNA;<br>2) Missing body weight and height;<br>3) gender mismatch with typed X-linked markers;<br>4) heterozygosity <23% or >30%;<br>5) >5.0% discordance in SNP pairs with r2=1 in HapMap;<br>6) ethnic outliers;<br>7) related individuals and duplicates. | 249                     | A random sample of 1,511 men and women in the top decade of age in the 25,000 participant EPIC-Norfolk prospective study were recruited into a bone fragility study with DXA measurements. GWA data were available for 249 participants with BMD measurements who had been entered into a GWAS investigation of obesity. | [PMID: 12753873]<br>(Kaptoge, 2003 Effects of gender, anthropometric variables, and aging on the evolution of hip strength in men and women aged over 65);<br>[PMID: 10466767]<br>(Day, 1999 EPIC-Norfolk: study design and characteristics of the cohort. European Prospective Investigation of Cancer);<br>[PMID: 19079261]<br>(Willer, 2009 Six new loci associated with body mass index highlight a neuronal influence on body weight regulation);                                                                                                                                                         |
| 7          | FHS       | Framingham Heart Study                                        | Cohort       | Population-based, family-based   | United States of America | Framingham                  | European American              | ≥ 97%            | 1. autosomal heterozygosity <0.26 or > 0.30;<br>2. ethnic outliers (using Eigenstrata).                                                                                                                                                                                | 3,886                   | The Framingham Osteoporosis Study is an ancillary study of the parent, Framingham Study. The Framingham Study is a family-based, multigenerational cohort study initiated originally to study the risk factors for cardiovascular disease                                                                                | [PMID: 14819398]<br>(Dawber, 1951 Epidemiological approaches to heart disease: the Framingham Study);<br>[PMID: 474565]<br>(Kannel, 1979 An investigation of coronary heart disease in families. The Framingham offspring study)<br>[PMID: 17372189]<br>(Splansky, 2007 The Third Generation Cohort of the National Heart, Lung, and Blood Institute's Framingham Heart Study: design, recruitment, and initial examination)                                                                                                                                                                                   |
| 8          | GOOD      | Gothenburg Osteoporosis and Obesity Determinants Study        | Cohort       | Population-based                 | Sweden                   | Gothenburg                  | Northern European              | ≥ 97.5%          | 1) excess autosomal heterozygosity > 0.336~FDR>0.1%;<br>2) duplicates and/or 1st or 2nd degree relatives using IBS probabilities >97% from PLINK;<br>3) ethnic outliers using IBS distances > 3SD from PLINK.                                                          | 938                     | A study initiated to determine both environmental and genetic factors involved in the regulation of bone and fat mass.                                                                                                                                                                                                   | [PMID: 16007330]<br>Lorenzton, M. et al Free testosterone is a positive whereas free estradiol is a negative predictor of cortical bone size in young Swedish men-The GOOD Study. J Bone Miner Res 20, 1334-1341 (2005).                                                                                                                                                                                                                                                                                                                                                                                       |
| 9          | HABC      | Health Aging and Body Composition                             | Cohort       | Population-based                 | United States of America | Pittsburgh, PA; Memphis, TN | European American              | ≥ 97%            | 1) missing DNA;<br>2) 1st or 2nd degree relatives;<br>3) missing body weight and height;<br>4) ethnic outliers.                                                                                                                                                        | 1,649                   | A population-based, prospective cohort study of well-functioning, unrelated men and women aged 70 and older. It was initiated to assess changes in body composition.                                                                                                                                                     | [PMID: 12028178]<br>(Visser, 2002 Leg muscle mass and composition in relation to lower extremity performance in men and women aged 70 to 79: the health, aging and body composition study);<br>[PMID: 16043679]<br>(Strotmeyer, 2005 Nontraumatic fracture risk with diabetes mellitus and impaired fasting glucose in older white and black adults: the health, aging, and body composition study);<br>[PMID: ]<br>(Strotmeyer, 2004 Diabetes is associated independently of body composition with BMD and bone volume in older white and black men and women: The Health, Aging, and Body Composition Study) |
| 10         | HKOS      | Hong Kong Osteoporosis Study                                  | Case-control | Population-based, clinical-based | China                    | Hong Kong                   | Southern Chinese of Han origin | ≥ 95%            | 1) missing DNA;<br>2) gender mismatch with typed X-linked markers;<br>3) autosomal heterozygosity ≤ 27% or ≥ 31%;<br>4) being related or identical to other individuals in the sample.                                                                                 | 800                     | A sample of 800 unrelated subjects with extreme BMD phenotype (Z-score ≤ -1.28 or ≥ +1.0 at either lumbar spine or femoral neck) were selected from a growing database of Hong Kong Southern Chinese (more than 7,000 volunteers)                                                                                        | [PMID:20096396]<br>(Kung, 2010 Association of JAG1 with bone mineral density and osteoporotic fractures: a genome-wide association study and follow up replication studies);                                                                                                                                                                                                                                                                                                                                                                                                                                   |



Supplementary Table 18A: Study design

Stage 1: GWAS BMD Discovery

| Study      |                |                                          |                 | Sample QC                                      |                          |                  |                        |                  | Total sample size with GWA and BMD and/or fracture data available                                                                                                                                                                                                                                                                                                                                                                                | Short Study Description | References                                                                                                                                                                                                                                                                                                                                                 |                                                                                                                                                                                                                                                                                                                                                                                     |
|------------|----------------|------------------------------------------|-----------------|------------------------------------------------|--------------------------|------------------|------------------------|------------------|--------------------------------------------------------------------------------------------------------------------------------------------------------------------------------------------------------------------------------------------------------------------------------------------------------------------------------------------------------------------------------------------------------------------------------------------------|-------------------------|------------------------------------------------------------------------------------------------------------------------------------------------------------------------------------------------------------------------------------------------------------------------------------------------------------------------------------------------------------|-------------------------------------------------------------------------------------------------------------------------------------------------------------------------------------------------------------------------------------------------------------------------------------------------------------------------------------------------------------------------------------|
| Short name | Full name      | Study design                             | Study base      | Country of origin                              | City/region of origin    | Ethnicity (es)   | Call rate              | Other exclusions |                                                                                                                                                                                                                                                                                                                                                                                                                                                  |                         |                                                                                                                                                                                                                                                                                                                                                            |                                                                                                                                                                                                                                                                                                                                                                                     |
| 11         | <b>Indiana</b> | Indiana Genetics of Bone Fragility Study | Cross-sectional | Population-based, family-based, clinical-based | United States of America | Indianapolis, IN | European American      | > 98%            | 1) history of chronic disease, taking medications known to affect bone mass or metabolism, weight >136 kg;<br>2) irregular menses or a history of pregnancy or lactation within three months prior to enrollment;<br>3) familial relationships that could not be unambiguously determined (n=14);<br>4) Three pairs of sisters (n=6 samples) were removed from further analysis due to evidence of substantial admixture with other populations. | 1,487                   | A study designed to identify genetic factors underlying peak bone mineral density variation in normal premenopausal women as a risk factor for osteoporotic fracture. The GWAS sample consists primarily of white sibling pairs and sibships, with subjects aged 20-40 years, with similar samples of men and African-American subjects collected as well. | [PMID: 20164292]<br>(Koller, 2010 Genome-wide association study of bone mineral density in premenopausal European-American women and replication in African-American women)                                                                                                                                                                                                         |
| 12         | <b>ORCADES</b> | The Orkney Complex Disease Study         | Cohort          | Population-based, family-based                 | United Kingdom           | Orkney           | North-western European | ≥ 95%            | 1) Gender mismatch;<br>2) Ethnic outliers using IBS distances >3SD from PLINK;<br>3) Missing weight or height;<br>4) Excess autosomal heterozygosity.                                                                                                                                                                                                                                                                                            | 427                     | The ORCADES study is an ongoing family-based genetic epidemiology collection in the isolated Scottish archipelago of Orkney                                                                                                                                                                                                                                | [PMID:20418889]<br>(Liu, 2010 Meta-analysis and imputation refines the association of 15q25 with smoking quantity);<br>[PMID:20010834]<br>(Repapi, 2010 Genome-wide association study identifies five loci associated with lung function);<br>[PMID:19060911]<br>(Aulchenko, 2009 Loci influencing lipid levels and coronary heart disease risk in 16 European population cohorts); |
| 13         | <b>RS-I</b>    | Rotterdam Study-I                        | Cohort          | Population-based                               | The Netherlands          | Rotterdam        | North-western European | ≥ 97.5%          | 1) missing DNA;<br>2) gender mismatch with typed X-linked markers;<br>3) excess autosomal heterozygosity > 0.336~FDR>0.1%;<br>4) duplicates and/or 1st or 2nd degree relatives using IBS probabilities >97% from PLINK;<br>5) ethnic outliers using IBS distances > 3SD from PLINK;<br>6) missing body weight and height.                                                                                                                        | 5,746                   | A prospective population-based cohort study of chronic disabling conditions in Dutch elderly individuals aged 55 years and over. The RS-III cohort included individuals aged 45 years and over.                                                                                                                                                            | [PMID:19700477]<br>(Estrada, 2009 GRIMP: a web- and grid-based tool for high-speed analysis of large-scale genome-wide association using imputed data);<br>[PMID:19728115]<br>(Hofman, 2009 The Rotterdam Study: 2010 objectives and design update);<br>[PMID:1833235]<br>(Hofman, 1991 Determinants of disease and disability in the elderly: the Rotterdam Elderly Study);        |
| 14         | <b>RS-II</b>   | Rotterdam Study-II                       | Cohort          | Population-based                               | The Netherlands          | Rotterdam        | North-western European | ≥ 97.5%          |                                                                                                                                                                                                                                                                                                                                                                                                                                                  | 2,157                   |                                                                                                                                                                                                                                                                                                                                                            |                                                                                                                                                                                                                                                                                                                                                                                     |
| 15         | <b>RS-III</b>  | Rotterdam Study-III                      | Cohort          | Population-based                               | The Netherlands          | Rotterdam        | North-western European | ≥ 97.5%          |                                                                                                                                                                                                                                                                                                                                                                                                                                                  | 1,212                   |                                                                                                                                                                                                                                                                                                                                                            |                                                                                                                                                                                                                                                                                                                                                                                     |
| 16         | <b>TUK-1</b>   | TwinsUK                                  | Cohort          | Population-based, family-based                 | United Kingdom           | NA               | North-western European | ≥ 95%            | 1) autosomal heterozygosity <0.33 or > 0.37;<br>2) ethnic outliers (using STRUCTURE);<br>3) missing BMD or weight measurements.                                                                                                                                                                                                                                                                                                                  | 1,511                   | TwinsUK is a population-based registry of British Twins representative of the general British population.                                                                                                                                                                                                                                                  | [PMID: 19841454]<br>(Richards, 2009 Collaborative meta-analysis: associations of 150 candidate genes with osteoporosis and osteoporotic fracture);<br>[PMID: 18455228]<br>(Richards, 2008 Bone mineral density, osteoporosis, and osteoporotic fractures: a genome-wide association study)                                                                                          |
| 17         | <b>TUK-23</b>  | TwinsUK                                  | Cohort          | Population-based, family-based                 | United Kingdom           | NA               | North-western European | ≥ 95%            |                                                                                                                                                                                                                                                                                                                                                                                                                                                  | 2,801                   |                                                                                                                                                                                                                                                                                                                                                            |                                                                                                                                                                                                                                                                                                                                                                                     |

Supplementary Table 18B: Study-specific descriptive statistics

Stage 1: GWAS BMD Discovery

| Study                            | Trait                       | Assessment method      | Men   |       |      |        |       |       | Women |       |      |        |       |       |
|----------------------------------|-----------------------------|------------------------|-------|-------|------|--------|-------|-------|-------|-------|------|--------|-------|-------|
|                                  |                             |                        | N     | mean  | sd   | median | min   | max   | N     | mean  | sd   | median | min   | max   |
| <b>1 AFOS</b>                    | Age (yrs)                   | Questionnaire          | 443   | 51.3  | 15.5 | 51.5   | 20.2  | 95.1  | 475   | 52.2  | 14.6 | 53.7   | 18.6  | 92.7  |
|                                  | BMI (kg/m <sup>2</sup> )    | Calculated             | 443   | 26.4  | 3.7  | 26.1   | 18.3  | 43.6  | 475   | 28.4  | 5.6  | 27.8   | 16.7  | 49.3  |
|                                  | Weight (kg)                 | Measured               | 443   | 77.9  | 12.2 | 76.8   | 50.9  | 125.4 | 475   | 72.2  | 14.5 | 71.1   | 37.8  | 120.4 |
|                                  | Height (cm)                 | Measured               | 443   | 171.5 | 6.4  | 172.1  | 154.2 | 193.5 | 475   | 159.5 | 5.9  | 160.0  | 137.6 | 175.5 |
|                                  | LS-BMD (g/cm <sup>2</sup> ) | Hologic 4500           | 443   | 1.0   | 0.1  | 1.0    | 0.6   | 1.4   | 475   | 0.9   | 0.2  | 0.9    | 0.4   | 1.4   |
|                                  | FN-BMD (g/cm <sup>2</sup> ) | Hologic 4500           | 443   | 0.9   | 0.1  | 0.8    | 0.5   | 1.3   | 475   | 0.8   | 0.1  | 0.8    | 0.4   | 1.4   |
| <b>2 AOGC<br/>high BMD group</b> | Age (yrs)                   | Questionnaire          | 0     | NA    | NA   | NA     | NA    | NA    | 1,051 | 70.4  | 8.3  | 71.0   | 48.0  | 86.0  |
|                                  | BMI (kg/m <sup>2</sup> )    | Measured               | 0     | NA    | NA   | NA     | NA    | NA    | 1,044 | 30.1  | 5.5  | 29.4   | 16.2  | 48.3  |
|                                  | Weight (kg)                 | Measured               | 0     | NA    | NA   | NA     | NA    | NA    | 1,047 | 77.5  | 14.7 | 76.0   | 44.0  | 134.7 |
|                                  | Height (cm)                 | Measured               | 0     | NA    | NA   | NA     | NA    | NA    | 1,044 | 160.5 | 6.2  | 160.2  | 139.1 | 180.0 |
|                                  | LS-BMD (g/cm <sup>2</sup> ) | Both Lunar and Hologic | 0     | NA    | NA   | NA     | NA    | NA    | 618   | 1.3   | 0.2  | 1.2    | 0.8   | 2.1   |
|                                  | FN-BMD (g/cm <sup>2</sup> ) | Both Lunar and Hologic | 0     | NA    | NA   | NA     | NA    | NA    | 1,021 | 0.9   | 0.1  | 0.9    | 0.6   | 1.8   |
| <b>AOGC<br/>low BMD group</b>    | Age (yrs)                   | Questionnaire          | 0     | NA    | NA   | NA     | NA    | NA    | 900   | 68.7  | 8.8  | 68.0   | 50.0  | 86.0  |
|                                  | BMI (kg/m <sup>2</sup> )    | Measured               | 0     | NA    | NA   | NA     | NA    | NA    | 893   | 24.3  | 4.8  | 23.4   | 14.8  | 48.5  |
|                                  | Weight (kg)                 | Measured               | 0     | NA    | NA   | NA     | NA    | NA    | 894   | 61.5  | 13.7 | 59.3   | 34.5  | 136.0 |
|                                  | Height (cm)                 | Measured               | 0     | NA    | NA   | NA     | NA    | NA    | 893   | 158.8 | 7.3  | 159.0  | 127.5 | 188.0 |
|                                  | LS-BMD (g/cm <sup>2</sup> ) | Both Lunar and Hologic | 0     | NA    | NA   | NA     | NA    | NA    | 552   | 0.9   | 0.2  | 0.9    | 0.5   | 1.5   |
|                                  | FN-BMD (g/cm <sup>2</sup> ) | Both Lunar and Hologic | 0     | NA    | NA   | NA     | NA    | NA    | 865   | 0.6   | 0.1  | 0.6    | 0.3   | 1.0   |
| <b>3 CHS</b>                     | Age (yrs)                   | Questionnaire          | 340   | 77.0  | 4.8  | 76.0   | 70.0  | 93.0  | 568   | 76.3  | 4.2  | 75.0   | 69.0  | 93.0  |
|                                  | BMI (kg/m <sup>2</sup> )    | Measured               | 340   | 26.3  | 3.8  | 26.1   | 11.1  | 41.4  | 568   | 26.0  | 5.1  | 25.8   | 7.5   | 44.6  |
|                                  | Weight (kg)                 | Measured               | 340   | 78.5  | 12.2 | 78.1   | 34.1  | 116.8 | 568   | 65.8  | 13.7 | 64.9   | 22.3  | 116.4 |
|                                  | Height (cm)                 | Measured               | 340   | 173   | 6.4  | 172    | 152   | 193   | 568   | 159   | 6.0  | 159    | 142   | 183   |
|                                  | LS-BMD (g/cm <sup>2</sup> ) | Whole Body Scan        | 340   | 1.1   | 0.2  | 1.1    | 0.6   | 2.6   | 568   | 0.9   | 0.2  | 0.9    | 0.4   | 3.3   |
|                                  | FN-BMD (g/cm <sup>2</sup> ) | Measured               | 340   | 0.8   | 0.1  | 0.8    | 0.4   | 1.4   | 568   | 0.6   | 0.1  | 0.6    | 0.3   | 1.1   |
| <b>4 DeCODE</b>                  | Age (yrs)                   | NationalRegistry       | 1,136 | 66.1  | 14.2 | 69.2   | 20.1  | 96.1  | 6,469 | 59.7  | 13.8 | 59.9   | 20.0  | 97.8  |
|                                  | BMI (kg/m <sup>2</sup> )    | Calculated             | 1,136 | 26.7  | 4.1  | 26.5   | 13.9  | 42.5  | 6,461 | 26.3  | 4.8  | 25.6   | 13.5  | 59.7  |
|                                  | Weight (kg)                 | Measured               | 1,136 | 83.4  | 14.4 | 83.0   | 38.4  | 129.5 | 6,461 | 71.1  | 13.4 | 69.7   | 30.0  | 129.3 |
|                                  | Height (cm)                 | Measured               | 1,136 | 176.5 | 6.7  | 176.0  | 148.5 | 196.0 | 6,469 | 164.4 | 6.2  | 164.5  | 116.5 | 188.0 |
|                                  | LS-BMD (g/cm <sup>2</sup> ) | Hologic                | 1,135 | 1.0   | 0.2  | 1.0    | 0.5   | 1.7   | 6,461 | 0.9   | 0.2  | 0.9    | 0.4   | 1.8   |
|                                  | FN-BMD (g/cm <sup>2</sup> ) | Hologic                | 1,115 | 0.8   | 0.1  | 0.9    | 0.4   | 1.3   | 6,279 | 0.7   | 0.1  | 0.6    | 0.2   | 1.4   |
| <b>5 ERF</b>                     | Age (yrs)                   | Questionnaire          | 1,419 | 50.6  | 14.9 | 50.9   | 17.6  | 88.6  | 1,815 | 50.6  | 15.9 | 50.7   | 16.7  | 95.7  |
|                                  | BMI (kg/m <sup>2</sup> )    | Measured               | 1,223 | 27.1  | 3.9  | 26.8   | 15.9  | 42.4  | 1,517 | 26.4  | 4.7  | 25.7   | 15.5  | 45.6  |
|                                  | Weight (kg)                 | Measured               | 1,232 | 83.3  | 14.0 | 81.8   | 41.9  | 154.7 | 1,532 | 69.4  | 13.6 | 67.4   | 42.1  | 161.0 |
|                                  | Height (cm)                 | Measured               | 1,232 | 174.8 | 7.2  | 174.7  | 152.2 | 196.5 | 1,533 | 161.8 | 6.5  | 161.6  | 141.0 | 182.8 |
|                                  | LS-BMD (g/cm <sup>2</sup> ) | GE-lunar DPX-L         | 1,215 | 1.2   | 0.2  | 1.2    | 0.6   | 1.8   | 1,504 | 1.1   | 0.2  | 1.1    | 0.6   | 1.8   |
|                                  | FN-BMD (g/cm <sup>2</sup> ) | GE-lunar DPX-L         | 1,207 | 1.0   | 0.1  | 1.0    | 0.5   | 1.7   | 1,512 | 0.9   | 0.1  | 0.9    | 0.5   | 1.3   |
| <b>6 EPIC Norfolk</b>            | Age (yrs)                   | Questionnaire          | 109   | 72.3  | 3.2  | 71.8   | 67.4  | 78.4  | 111   | 72.4  | 3.0  | 72.8   | 67.5  | 78.7  |
|                                  | BMI (kg/m <sup>2</sup> )    | Measured               | 109   | 28.1  | 4.0  | 28.1   | 19.0  | 39.3  | 111   | 29.6  | 4.5  | 29.5   | 18.4  | 41.0  |
|                                  | Weight (kg)                 | Measured               | 109   | 82.7  | 12.9 | 82.8   | 56.4  | 128.5 | 111   | 74.9  | 12.5 | 74.4   | 46.8  | 104.0 |
|                                  | Height (cm)                 | Measured               | 109   | 171.5 | 5.3  | 171.7  | 154.9 | 188.9 | 111   | 159.0 | 5.7  | 159.1  | 144.9 | 177.2 |
|                                  | LS-BMD (g/cm <sup>2</sup> ) | NA                     | NA    | NA    | NA   | NA     | NA    | NA    | NA    | NA    | NA   | NA     | NA    | NA    |
|                                  | FN-BMD (g/cm <sup>2</sup> ) | Hologic QDR 1000W      | 109   | 0.8   | 0.1  | 0.8    | 0.5   | 1.3   | 111   | 0.7   | 0.1  | 0.7    | 0.5   | 1.0   |
| <b>7 FHS</b>                     | Age (yrs)                   | Questionnaire          | 1,548 | 64.5  | 10.9 | 64.0   | 35.0  | 92.0  | 2,081 | 64.9  | 11.5 | 65.0   | 29.0  | 96.0  |
|                                  | BMI (kg/m <sup>2</sup> )    | Measured               | 1,540 | 28.4  | 4.4  | 27.9   | 17.1  | 53.4  | 2,060 | 27.3  | 5.5  | 26.4   | 15.4  | 58.2  |
|                                  | Weight (kg)                 | Measured               | 1,544 | 86.0  | 14.9 | 84.4   | 46.3  | 170.1 | 2,066 | 69.8  | 15.0 | 67.6   | 36.3  | 158.8 |
|                                  | Height (cm)                 | Measured               | 1,540 | 174   | 7    | 174    | 152   | 200   | 2,060 | 160   | 7    | 160    | 138   | 183   |

**Supplementary Table 18B: Study-specific descriptive statistics**

**Stage 1: GWAS BMD Discovery**

| Study             | Trait                    | Assessment method | Men   |       |      |        |       |       | Women |       |      |        |       |       |
|-------------------|--------------------------|-------------------|-------|-------|------|--------|-------|-------|-------|-------|------|--------|-------|-------|
|                   |                          |                   | N     | mean  | sd   | median | min   | max   | N     | mean  | sd   | median | min   | max   |
|                   | LS-BMD (g/cm2)           | GE-lunar DPX-L    | 1,492 | 1.3   | 0.2  | 1.3    | 0.7   | 2.4   | 2,008 | 1.1   | 0.2  | 1.1    | 0.5   | 2.0   |
|                   | FN-BMD (g/cm2)           | GE-lunar DPX-L    | 1,531 | 1.0   | 0.1  | 1.0    | 0.5   | 1.7   | 2,043 | 0.8   | 0.2  | 0.8    | 0.1   | 1.4   |
| <b>8 GOOD</b>     | Age (yrs)                | Questionnaire     | 938   | 18.9  | 0.6  | 18.8   | 18.0  | 20.1  | 0     | NA    | NA   | NA     | NA    | NA    |
|                   | BMI (kg/m <sup>2</sup> ) | Measured          | 938   | 22.4  | 3.2  | 21.9   | 16.1  | 41.6  | 0     | NA    | NA   | NA     | NA    | NA    |
|                   | Weight (kg)              | Measured          | 938   | 73.9  | 11.6 | 72.0   | 51.3  | 127.0 | 0     | NA    | NA   | NA     | NA    | NA    |
|                   | Height (cm)              | Measured          | 938   | 182   | 7.0  | 182    | 161   | 203   | 0     | NA    | NA   | NA     | NA    | NA    |
|                   | LS-BMD (g/cm2)           | GE_Lunar_Prodigy  | 938   | 1.2   | 0.2  | 1.2    | 0.8   | 1.7   | 0     | NA    | NA   | NA     | NA    | NA    |
|                   | FN-BMD (g/cm2)           | GE_Lunar_Prodigy  | 938   | 1.2   | 0.2  | 1.2    | 0.8   | 1.8   | 0     | NA    | NA   | NA     | NA    | NA    |
| <b>9 HABC</b>     | Age (yrs)                | Questionnaire     | 879   | 73.9  | 2.9  | 74.0   | 69.0  | 80.0  | 784   | 73.6  | 2.8  | 73.0   | 69.0  | 80.0  |
|                   | BMI (kg/m <sup>2</sup> ) | Measured          | 879   | 27.1  | 3.7  | 26.7   | 17.6  | 44.2  | 784   | 26.1  | 4.5  | 25.6   | 15.6  | 44.7  |
|                   | Weight (kg)              | Measured          | 879   | 81.6  | 12.4 | 80.0   | 52.2  | 134.5 | 784   | 66.4  | 12.1 | 65.1   | 40.8  | 123.0 |
|                   | Height (cm)              | Measured          | 879   | 173.6 | 6.4  | 173.4  | 151.1 | 194.8 | 784   | 159.4 | 5.8  | 159.6  | 141.6 | 175.6 |
|                   | LS-BMD (g/cm2)           | Hologic QDR 4500  | 871   | 1.1   | 0.2  | 1.1    | 0.6   | 2.4   | 778   | 0.9   | 0.2  | 0.9    | 0.6   | 1.7   |
|                   | FN-BMD (g/cm2)           | Hologic QDR 4500  | 869   | 0.8   | 0.1  | 0.8    | 0.4   | 1.3   | 776   | 0.7   | 0.1  | 0.7    | 0.3   | 1.1   |
| <b>10 HKOS</b>    | Age (yrs)                | Questionnaire     | 0     | NA    | NA   | NA     | NA    | NA    | 800   | 48.9  | 15.6 | 50.0   | 20.0  | 84.0  |
|                   | BMI (kg/m <sup>2</sup> ) | Measured          | 0     | NA    | NA   | NA     | NA    | NA    | 800   | 22.7  | 3.9  | 22.0   | 15.0  | 40.5  |
|                   | Weight (kg)              | Measured          | 0     | NA    | NA   | NA     | NA    | NA    | 800   | 54.7  | 10.2 | 53.2   | 33.5  | 93.5  |
|                   | Height (cm)              | Measured          | 0     | NA    | NA   | NA     | NA    | NA    | 800   | 155   | 6.7  | 156    | 127   | 175   |
|                   | LS-BMD (g/cm2)           | Hologic- Delphi W | 0     | NA    | NA   | NA     | NA    | NA    | 800   | 0.9   | 0.2  | 0.9    | 0.3   | 1.6   |
|                   | FN-BMD (g/cm2)           | Hologic- Delphi W | 0     | NA    | NA   | NA     | NA    | NA    | 800   | 0.7   | 0.2  | 0.7    | 0.3   | 1.9   |
| <b>11 Indiana</b> | Age (yrs)                | Questionnaire     | 0     | NA    | NA   | NA     | NA    | NA    | 1,481 | 33.1  | 7.2  | 33.3   | 20.0  | 50.7  |
|                   | BMI (kg/m <sup>2</sup> ) | Measured          | 0     | NA    | NA   | NA     | NA    | NA    | 1,476 | 25.6  | 5.9  | 24.1   | 15.7  | 57.3  |
|                   | Weight (kg)              | Measured          | 0     | NA    | NA   | NA     | NA    | NA    | 1,476 | 70.0  | 16.6 | 66.0   | 41.2  | 166.0 |
|                   | Height (cm)              | Measured          | 0     | NA    | NA   | NA     | NA    | NA    | 1,476 | 165.5 | 6.1  | 165.3  | 146.8 | 192.3 |
|                   | LS-BMD (g/cm2)           | GE_Lunar_Prodigy  | 0     | NA    | NA   | NA     | NA    | NA    | 1,479 | 1.3   | 0.1  | 1.3    | 0.9   | 1.8   |
|                   | FN-BMD (g/cm2)           | GE_Lunar_Prodigy  | 0     | NA    | NA   | NA     | NA    | NA    | 1,479 | 1.0   | 0.1  | 1.0    | 0.6   | 1.6   |
| <b>12 ORCADES</b> | Age (yrs)                | Questionnaire     | 194   | 57.7  | 13.5 | 58.9   | 24.5  | 86.8  | 233   | 58.8  | 13.0 | 61.0   | 23.6  | 81.7  |
|                   | BMI (kg/m <sup>2</sup> ) | Measured          | 194   | 27.8  | 4.4  | 27.2   | 16.8  | 47.7  | 233   | 27.7  | 5.2  | 26.5   | 18.5  | 47.2  |
|                   | Weight (kg)              | Measured          | 194   | 84.8  | 14.3 | 83.3   | 42.0  | 147.5 | 233   | 71.5  | 13.7 | 69.3   | 43.0  | 115.4 |
|                   | Height (cm)              | Measured          | 194   | 174.7 | 6.6  | 175.2  | 157.9 | 198.6 | 233   | 160.7 | 6.2  | 160.9  | 139.5 | 181.0 |
|                   | LS-BMD (g/cm2)           | Hologic QDR 4500  | 194   | 1.1   | 0.2  | 1.1    | 0.7   | 1.6   | 233   | 1.0   | 0.2  | 1.0    | 0.6   | 1.4   |
|                   | FN-BMD (g/cm2)           | Hologic QDR 4500  | 192   | 0.8   | 0.1  | 0.8    | 0.6   | 1.3   | 229   | 0.8   | 0.1  | 0.7    | 0.5   | 1.0   |
| <b>13 RS-I</b>    | Age (yrs)                | Questionnaire     | 2,427 | 68.1  | 8.2  | 67.1   | 55.0  | 97.8  | 3,547 | 70.3  | 9.6  | 69.4   | 55.0  | 99.2  |
|                   | BMI (kg/m <sup>2</sup> ) | Measured          | 2,372 | 25.7  | 3.0  | 25.6   | 14.2  | 38.2  | 3,372 | 26.7  | 4.1  | 26.3   | 15.4  | 59.5  |
|                   | Weight (kg)              | Measured          | 2,375 | 78.6  | 10.7 | 77.8   | 41.0  | 122.3 | 3,383 | 69.6  | 11.3 | 68.7   | 40.1  | 146.5 |
|                   | Height (cm)              | Measured          | 2,372 | 174.8 | 6.8  | 174.6  | 151.0 | 198.0 | 3,375 | 161.3 | 6.6  | 161.5  | 101.0 | 191.5 |
|                   | LS-BMD (g/cm2)           | GE-lunar DPX-L    | 2,116 | 1.2   | 0.2  | 1.2    | 0.5   | 2.0   | 2,798 | 1.0   | 0.2  | 1.0    | 0.5   | 1.7   |
|                   | FN-BMD (g/cm2)           | GE-lunar DPX-L    | 2,106 | 0.9   | 0.1  | 0.9    | 0.4   | 1.4   | 2,799 | 0.8   | 0.1  | 0.8    | 0.4   | 1.5   |
| <b>14 RS-II</b>   | Age (yrs)                | Questionnaire     | 785   | 63.7  | 6.8  | 61.5   | 55.1  | 89.3  | 902   | 63.8  | 7.4  | 61.4   | 55.1  | 92.3  |
|                   | BMI (kg/m <sup>2</sup> ) | Measured          | 785   | 26.9  | 3.3  | 26.8   | 16.8  | 40.5  | 902   | 27.4  | 4.4  | 26.8   | 16.7  | 45.5  |
|                   | Weight (kg)              | Measured          | 785   | 83.5  | 11.4 | 82.5   | 54.0  | 126.8 | 902   | 72.8  | 12.5 | 71.2   | 44.1  | 125.3 |
|                   | Height (cm)              | Measured          | 785   | 176.0 | 6.5  | 175.9  | 156.8 | 203.0 | 902   | 162.9 | 6.2  | 163.0  | 141.5 | 189.6 |
|                   | LS-BMD (g/cm2)           | GE-lunar DPX-L    | 781   | 1.2   | 0.2  | 1.2    | 0.7   | 1.9   | 898   | 1.1   | 0.2  | 1.1    | 0.5   | 2.0   |
|                   | FN-BMD (g/cm2)           | GE-lunar DPX-L    | 779   | 1.0   | 0.1  | 1.0    | 0.6   | 1.6   | 888   | 0.9   | 0.1  | 0.9    | 0.5   | 1.4   |
| <b>15 RS-III</b>  | Age (yrs)                | Questionnaire     | 528   | 56.1  | 5.5  | 56.3   | 45.9  | 84.2  | 683   | 56.1  | 5.4  | 56.6   | 45.8  | 87.9  |
|                   | BMI (kg/m <sup>2</sup> ) | Measured          | 525   | 28.0  | 4.0  | 27.3   | 19.5  | 46.7  | 683   | 27.6  | 5.0  | 26.7   | 14.0  | 48.2  |
|                   | Weight (kg)              | Measured          | 525   | 89.7  | 14.1 | 87.7   | 60.8  | 149.9 | 683   | 75.2  | 14.3 | 73.1   | 35.0  | 137.6 |

**Supplementary Table 18B: Study-specific descriptive statistics**

**Stage 1: GWAS BMD Discovery**

| Study            | Trait                    | Assessment method | Men |       |      |        |       |       | Women |       |      |        |       |       |
|------------------|--------------------------|-------------------|-----|-------|------|--------|-------|-------|-------|-------|------|--------|-------|-------|
|                  |                          |                   | N   | mean  | sd   | median | min   | max   | N     | mean  | sd   | median | min   | max   |
|                  | Height (cm)              | Measured          | 525 | 178.8 | 6.7  | 178.6  | 160.5 | 197.5 | 683   | 165.0 | 6.2  | 164.8  | 146.5 | 184.5 |
|                  | LS-BMD (g/cm2)           | GE-lunar DPX-L    | 437 | 1.2   | 0.2  | 1.2    | 0.8   | 1.8   | 583   | 1.2   | 0.2  | 1.2    | 0.7   | 1.9   |
|                  | FN-BMD (g/cm2)           | GE-lunar DPX-L    | 511 | 1.0   | 0.1  | 1.0    | 0.6   | 1.5   | 666   | 0.9   | 0.1  | 0.9    | 0.6   | 1.5   |
| <b>16 TUK-1</b>  | Age (yrs)                | Questionnaire     | 0   | NA    | NA   | NA     | NA    | NA    | 1,523 | 49.8  | 13.1 | 51.2   | 16.6  | 80.9  |
|                  | BMI (kg/m <sup>2</sup> ) | Measured          | 0   | NA    | NA   | NA     | NA    | NA    | 1,523 | 25.2  | 4.8  | 24.2   | 17.4  | 40.1  |
|                  | Weight (kg)              | Measured          | 0   | NA    | NA   | NA     | NA    | NA    | 1,523 | 67.5  | 12.7 | 65.2   | 35.1  | 128.3 |
|                  | Height (cm)              | Measured          | 0   | NA    | NA   | NA     | NA    | NA    | 1,523 | 162.1 | 6.3  | 162.0  | 148.0 | 177.0 |
|                  | LS-BMD (g/cm2)           | Hologic QDR 4500W | 0   | NA    | NA   | NA     | NA    | NA    | 1,517 | 1.0   | 0.2  | 1.0    | 0.6   | 1.8   |
|                  | FN-BMD (g/cm2)           | Hologic QDR 4500W | 0   | NA    | NA   | NA     | NA    | NA    | 1,487 | 0.8   | 0.1  | 0.8    | 0.3   | 1.3   |
| <b>17 TUK-23</b> | Age (yrs)                | Questionnaire     | 373 | 49.8  | 14.6 | 50.1   | 18.3  | 81.4  | 2,439 | 50.0  | 13.8 | 51.8   | 16.2  | 82.1  |
|                  | BMI (kg/m <sup>2</sup> ) | Measured          | 365 | 25.8  | 3.3  | 25.7   | 19.1  | 35.2  | 2,359 | 25.4  | 4.7  | 24.6   | 17.7  | 41.4  |
|                  | Weight (kg)              | Measured          | 373 | 80.4  | 11.8 | 79.8   | 40.5  | 122.7 | 2,439 | 67.6  | 13.0 | 65.5   | 40.0  | 166.0 |
|                  | Height (cm)              | Measured          | 365 | 175.1 | 7.1  | 175.0  | 161.0 | 191.0 | 2,359 | 162.2 | 6.3  | 162.0  | 149.0 | 177.0 |
|                  | LS-BMD (g/cm2)           | Hologic QDR 4500W | 371 | 1.0   | 0.2  | 1.0    | 0.6   | 1.5   | 2,427 | 1.0   | 0.1  | 1.0    | 0.5   | 1.6   |
|                  | FN-BMD (g/cm2)           | Hologic QDR 4500W | 368 | 0.9   | 0.1  | 0.9    | 0.5   | 1.3   | 2,404 | 0.8   | 0.1  | 0.8    | 0.4   | 3.6   |

## Supplementary Table 18C: Study descriptives fracture

### Stage 1: GWAS BMD Discovery

| Study            | Trait                   | Assessment method                                          | Men        |                | Women      |                |
|------------------|-------------------------|------------------------------------------------------------|------------|----------------|------------|----------------|
|                  |                         |                                                            | Fracture N | Non-fracture N | Fracture N | Non-fracture N |
| <b>1 AFOS</b>    | All fractures           | NA                                                         | NA         | NA             | NA         | NA             |
|                  | Non-vertebral fractures | NA                                                         | NA         | NA             | NA         | NA             |
|                  | Vertebral fractures     | NA                                                         | NA         | NA             | NA         | NA             |
| <b>2 AOGC</b>    | All fractures           | Interview with questionnaire                               | NA         | NA             | 431        | 1,224          |
|                  | Non-vertebral fractures | Radiographic                                               | NA         | NA             | 294        | 1,224          |
|                  | Vertebral fractures     | NA                                                         | NA         | NA             | NA         | NA             |
| <b>3 CHS</b>     | All fractures           | NA                                                         | NA         | NA             | NA         | NA             |
|                  | Non-vertebral fractures | NA                                                         | NA         | NA             | NA         | NA             |
|                  | Vertebral fractures     | NA                                                         | NA         | NA             | NA         | NA             |
| <b>4 DeCODE</b>  | All fractures           | Medical records, radiographic documentation, questionnaire | 532        | 6,890          | 1,453      | 7,673          |
|                  | Non-vertebral fractures | NA                                                         | NA         | NA             | NA         | NA             |
|                  | Vertebral fractures     | NA                                                         | NA         | NA             | NA         | NA             |
| <b>5 ERF</b>     | All fractures           | Interview                                                  | 594        | 721            | 470        | 1,141          |
|                  | Non-vertebral fractures | NA                                                         | NA         | NA             | NA         | NA             |
|                  | Vertebral fractures     | NA                                                         | NA         | NA             | NA         | NA             |
| <b>6 EPICNOR</b> | All fractures           | Medical records                                            | 143        | 1,478          | 228        | 1,703          |
|                  | Non-vertebral fractures | Medical records                                            | 119        | 1,502          | 203        | 1,728          |
|                  | Vertebral fractures     | NA                                                         | NA         | NA             | NA         | NA             |
| <b>7 FHS</b>     | All fractures           | Self-report and medical records                            | 583        | 1,351          | 937        | 1,431          |
|                  | Non-vertebral fractures | Medical records                                            | 401        | 1,153          | 738        | 1,352          |
|                  | Vertebral fractures     | Radiographic                                               | 48         | 1,506          | 77         | 2,013          |
| <b>8 GOOD</b>    | All fractures           | Radiographic doc                                           | 304        | 687            | NA         | NA             |
|                  | Non-vertebral fractures | NA                                                         | NA         | NA             | NA         | NA             |
|                  | Vertebral fractures     | NA                                                         | NA         | NA             | NA         | NA             |
| <b>9 HABC</b>    | All fractures           | Radiographic                                               | 109        | 769            | 199        | 584            |
|                  | Non-vertebral fractures | Radiographic                                               | 88         | 790            | 165        | 618            |
|                  | Vertebral fractures     | NA                                                         | NA         | NA             | NA         | NA             |

## Supplementary Table 18C: Study descriptives fracture

### Stage 1: GWAS BMD Discovery

| Study             | Trait                   | Assessment method                               | Men        |                | Women      |                |
|-------------------|-------------------------|-------------------------------------------------|------------|----------------|------------|----------------|
|                   |                         |                                                 | Fracture N | Non-fracture N | Fracture N | Non-fracture N |
| <b>10 HKOS</b>    | All fractures           | Medical records, Radiographic and Questionnaire | NA         | NA             | 79         | 627            |
|                   | Non-vertebral fractures | NA                                              | NA         | NA             | NA         |                |
|                   | Vertebral fractures     | NA                                              | NA         | NA             | NA         |                |
| <b>11 Indiana</b> | All fractures           | NA                                              | NA         | NA             | NA         |                |
|                   | Non-vertebral fractures | NA                                              | NA         | NA             | NA         |                |
|                   | Vertebral fractures     | NA                                              | NA         | NA             | NA         |                |
| <b>12 ORCADES</b> | All fractures           | NA                                              | NA         | NA             | NA         |                |
|                   | Non-vertebral fractures | NA                                              | NA         | NA             | NA         |                |
|                   | Vertebral fractures     | NA                                              | NA         | NA             | NA         |                |
| <b>13 RS-I</b>    | All fractures           | Medical records                                 | 227        | 2,151          | 753        | 2,615          |
|                   | Non-vertebral fractures | Medical records                                 | 174        | 2,201          | 622        | 2,761          |
|                   | Vertebral fractures     | Medical records and Radiographic                | 128        | 1,184          | 201        | 1,470          |
| <b>14 RS-II</b>   | All fractures           | Medical records                                 | 41         | 941            | 88         | 1,080          |
|                   | Non-vertebral fractures | Medical records                                 | 33         | 951            | 71         | 1,102          |
|                   | Vertebral fractures     | Medical records and Radiographic                | 9          | 975            | 22         | 1,151          |
| <b>15 RS-III</b>  | All fractures           | NA                                              | NA         | NA             | NA         |                |
|                   | Non-vertebral fractures | NA                                              | NA         | NA             | NA         |                |
|                   | Vertebral fractures     | NA                                              | NA         | NA             | NA         |                |
| <b>16 TUK-1</b>   | All fractures           | Medical records, Radiographic and Questionnaire | NA         | NA             | 332        | 1,337          |
|                   | Non-vertebral fractures | Medical records and Radiographic                | NA         | NA             | 48         | 1,621          |
|                   | Vertebral fractures     | NA                                              | NA         | NA             | NA         |                |
| <b>17 TUK-23</b>  | All fractures           | Medical records, Radiographic and Questionnaire | 52         | 406            | 475        | 2,416          |
|                   | Non-vertebral fractures | Medical records and Radiographic                | 1          | 457            | 72         | 2,819          |
|                   | Vertebral fractures     | NA                                              | NA         | NA             | NA         |                |

Supplementary Table 18D: Genotyping/Imputation

## Stage 1: GWAS BMD Discovery

| Cohort     | Platform                                                                                        | Genotyping                 |      |                                               | SNPs that met QC criteria | Imputation          |        |                                           | Association analyses            |                      |           |       |                    |                    |      |
|------------|-------------------------------------------------------------------------------------------------|----------------------------|------|-----------------------------------------------|---------------------------|---------------------|--------|-------------------------------------------|---------------------------------|----------------------|-----------|-------|--------------------|--------------------|------|
|            |                                                                                                 | Genotype calling algorithm | MAF  | Inclusion criteria<br>Call rate*<br>p for HWE |                           | Imputation software | MAF    | Inclusion criteria<br>Imputation quality* | Analyses software               | No. analyzed SNPs    | Men       | Women | $\lambda$<br>LSBMD | $\lambda$<br>FNBMD |      |
| 1 AFOS     | Affymetrix / 500K or 6.0                                                                        | Birdseed                   | ≥ 1% | ≥ 95.0%                                       | > 10 <sup>-6</sup>        | 338,598             | MACH   | ≥1%                                       | MACH R2 ≥ 0.3                   | MMAP (J. O'Connell)  | 2,543,013 | 443   | 475                | 1.06               | 1.07 |
| 2 AOGC     | Illumina Infinium II 370CNVQuad (n=1882); HumHap300 (n=140), 370CNVDuo (n=4) and 610Quad (n=10) | BeadStudio                 | ≥ 1% | ≥ 98%                                         | > 10 <sup>-7</sup>        | 289,499             | MACH   | ≥ 1%                                      | MACH R2 ≥ 0.3                   | MACH2DAT             | 2,543,887 | 0     | 1,955              | 1.01               | 1.02 |
| 3 CHS      | Illumina 370CNV                                                                                 | BeadStudio                 | > 1% | ≥97%                                          | > 10 <sup>-5</sup>        | 306,655             | BimBam | ≥1%                                       | (O/E)o <sup>2</sup> ratio ≥ 0.3 | R                    | 2,335,99  | 347   | 563                | 1.03               | 0.98 |
| 4 DeCODE   | Illumina HH300 and 370CNV                                                                       | BeadStudio                 | > 1% | > 96%                                         | > 10 <sup>-6</sup>        | 281,410             | IMPUTE | ≥1%                                       | Prop_info >0.4                  | SNPTEST              | 2,454,808 | 1,136 | 6,469              | 1.00               | 1.00 |
| 5 EPICNOR  | Affymetrix 500K                                                                                 | BRLMM                      | ≥ 1% | ≥ 90%                                         | > 10 <sup>-6</sup>        | 397,438             | IMPUTE | ≥1%                                       | Prop_info >0.4                  | SNPTEST              | 2,313,843 | 109   | 111                | -                  | 1.00 |
| 6 ERF      | Illumina 318K, 370K, Affymetrix 250K                                                            | Beadstudio, BRLMM          | > 1% | > 98%                                         | > 10 <sup>-6</sup>        | 487,573             | MACH   | ≥1%                                       | MACH R2 ≥ 0.3                   | ProbABEL             | 2,543,887 | 887   | 1,178              | 1.07               | 1.02 |
| 7 FHS      | Affymetrix 500K Dual GeneChip + 50K gene-centered MIP set                                       | BRLMM                      | ≥ 1% | ≥ 97%                                         | ≥ 10 <sup>-6</sup>        | 378,163             | MACH   | ≥1%                                       | (O/E)o <sup>2</sup> ratio ≥ 0.3 | Kinship R-Package    | 2,471,285 | 1,554 | 2,090              | 1.03               | 1.02 |
| 8 GOOD     | Illumina / HumanHap 610 Quad                                                                    | Beadstudio Genecall        | ≥ 1% | ≥ 98%                                         | > 10 <sup>-6</sup>        | 521,160             | MACH   | ≥1%                                       | MACH R2 ≥ 0.3                   | MACH2QTL via GRIMP   | 2,543,887 | 938   | 0                  | 0.99               | 1.01 |
| 9 HABC     | Illumina / Human 1M-Duo                                                                         | Beadstudio                 | ≥1%  | ≥97%                                          | > 10 <sup>-6</sup>        | 914,263             | MACH   | ≥1%                                       | MACH R2 ≥ 0.3                   | SNPTEST              | 2,543,887 | 871   | 778                | 1.00               | 1.01 |
| 10 HKOS    | Illumina / Human610-Quad                                                                        | Illumina's GenomeStudio    | ≥ 1% | ≥ 95%                                         | > 10 <sup>-4</sup>        | 488,853             | IMPUTE | ≥1%                                       | Prop_info >0.4                  | SNPTEST              | 2,329,916 | 0     | 778                | 1.00               | 1.01 |
| 11 Indiana | Illumina 610Quadv1_B                                                                            | Beadstudio v3.2.32         | ≥ 1% | ≥ 95%                                         | > 10 <sup>-4</sup>        | 553,331             | IMPUTE | ≥1%                                       | Prop_info >0.4                  | Merlin               | 2,626,037 | 0     | 1,487              | 1.01               | 0.99 |
| 12 ORCADES | Illumina / HumanHap 300K V.2                                                                    | Beadstudio Genecall        | ≥ 1% | ≥ 98.0%                                       | > 10 <sup>-6</sup>        | 306,207             | MACH   | ≥1%                                       | MACH R2 ≥ 0.3                   | R, GenABEL, ProbABEL | 2,543,887 | 194   | 233                | 1.00               | 1.01 |
| 13 RS-I    | Illumina / HumanHap 550K V.3 /HumanHap 550 V.3 DUO;                                             | Beadstudio Genecall        | ≥ 1% | ≥ 97.5%                                       | > 10 <sup>-6</sup>        | 512,349             | MACH   | ≥1%                                       | MACH R2 ≥ 0.3                   | MACH2QTL via GRIMP   | 2,543,887 | 2,378 | 3,368              | 1.07               | 1.05 |
| 14 RS-II   | Illumina / HumanHap 550K V.3 /HumanHap 550 V.3 DUO;                                             | Beadstudio Genecall        | ≥ 1% | ≥ 97.5%                                       | > 10 <sup>-6</sup>        | 466,389             | MACH   | ≥1%                                       | MACH R2 ≥ 0.3                   | MACH2QTL via GRIMP   | 2,543,887 | 982   | 1,168              | 1.01               | 1.00 |
| 15 RS-III  | Illumina / HumanHap610                                                                          | Beadstudio Genecall        | ≥ 1% | ≥ 97.5%                                       | > 10 <sup>-6</sup>        | 514,073             | MACH   | ≥1%                                       | MACH R2 ≥ 0.3                   | MACH2QTL via GRIMP   | 2,543,887 | 517   | 695                | 1.00               | 1.00 |
| 16 TUK-1   | Illumina HumanHap 300 & 550. Illumina HumanCNV370 Duo                                           | Beadstudio Genecall        | ≥ 1% | ≥ 95%                                         | > 10 <sup>-6</sup>        | 313,575             | IMPUTE | ≥1%                                       | Prop_info >0.4                  | GenABEL              | 2,561,701 | 0     | 1,511              | 1.01               | 1.01 |
| 17 TUK-23  | Illumina 610k                                                                                   | Beadstudio Genecall        | ≥ 1% | ≥ 95%                                         | > 10 <sup>-6</sup>        | 545,026             | IMPUTE | ≥1%                                       | Prop_info >0.4                  | GenABEL              | 2,561,701 | 375   | 2,426              | 0.99               | 1.08 |

Supplementary Table 19A: Study design

Stage 2: In-silico Replication BMD Loci and Fracture association

| Study                                   |                                                                                                 |                                     |                                  |                                          |                       |                        | Sample QC |                                                                                                                                                                                                                                                                                                                           |        |                                                                                                                                                                                                                                                                                                                                                                                                                                                                                                                                                                                                                                                                                                                                                         | Total sample size with available GWA and BMD and/or fracture data                                                                                                                                                                         | Short Study Description | References |
|-----------------------------------------|-------------------------------------------------------------------------------------------------|-------------------------------------|----------------------------------|------------------------------------------|-----------------------|------------------------|-----------|---------------------------------------------------------------------------------------------------------------------------------------------------------------------------------------------------------------------------------------------------------------------------------------------------------------------------|--------|---------------------------------------------------------------------------------------------------------------------------------------------------------------------------------------------------------------------------------------------------------------------------------------------------------------------------------------------------------------------------------------------------------------------------------------------------------------------------------------------------------------------------------------------------------------------------------------------------------------------------------------------------------------------------------------------------------------------------------------------------------|-------------------------------------------------------------------------------------------------------------------------------------------------------------------------------------------------------------------------------------------|-------------------------|------------|
| Short name                              | Full name                                                                                       | Study design                        | Study base                       | Country of origin                        | City/region of origin | Ethnicity              | Call rate | Other exclusions                                                                                                                                                                                                                                                                                                          |        |                                                                                                                                                                                                                                                                                                                                                                                                                                                                                                                                                                                                                                                                                                                                                         |                                                                                                                                                                                                                                           |                         |            |
| <b>1</b> AGES                           | Age, Gene/Environment Susceptibility Reykjavik Study                                            | Cohort                              | Population-based                 | Iceland                                  | Reykjavik             | Northern European      | >97%      | 1) mismatch with genotypes from other experiments;<br>2) missing height and weight.                                                                                                                                                                                                                                       | 3,185  | The Age Gene/Environment Susceptibility-Reykjavik Study originally comprised a random sample of 30,795 men and women born in 1907-1935 and living in Reykjavik in 1967. A total of 19,381 people attended, resulting in a 71% recruitment rate. The study sample was divided into six groups by birth year and birth date within month. One group was designated for longitudinal follow up and was examined in all stages; another was designated as a control group and was not included in examinations until 1991. Other groups were invited to participate in specific stages of the study. Between 2002 and 2006, the AGES-Reykjavik study re-examined 5,764 survivors of the original cohort who had participated before in the Reykjavik Study. | [PMID: 17351290]<br>[Harris, 2007 Age, Gene/Environment Susceptibility-Reykjavik Study; multidisciplinary applied phenomics]                                                                                                              |                         |            |
| <b>2</b> DeCODE insilico rep            | DeCODE Genetics Study (replication set)                                                         | Case-control                        | Population-based, clinical-based | Iceland                                  | NA                    | North-western European | ≥ 98%     | 1) missing body weight and height;<br>2) missing age at fracture;<br>3) missing ever/never fracture information.                                                                                                                                                                                                          | 2,878  | The study includes 40,000 individuals taking part in various disease projects                                                                                                                                                                                                                                                                                                                                                                                                                                                                                                                                                                                                                                                                           | [PMID: 18445777]<br>[Styrkarsdottir, 2008 Multiple genetic loci for bone mineral density and fractures];<br>[PMID: 19079262]<br>[Styrkarsdottir, 2009 Multiple genetic loci for bone mineral density and fractures]                       |                         |            |
| <b>3</b> PROSPER/ PHASE                 | The PROspective Study of Pravastatin in the Elderly at Risk                                     | Cohort, randomized-controlled trial | Clinical-based                   | The Netherlands/ United Kingdom /Ireland | Leiden/ Glasgow/ Cork | European               | ≥ 97.5%   | 1) missing DNA;<br>2) gender mismatch with typed X-linked markers;<br>3) excess autosomal heterozygosity > 0.336-FDR>0.1%;<br>4) duplicates and/or 1st or 2nd degree relatives using IBS probabilities >97% from PLINK;<br>5) ethnic outliers using IBS distances > 3SD from PLINK;<br>6) Missing body weight and height. | 5,242  | A randomized controlled clinical trial to test the effect of pravastatin on cardiovascular outcomes in the elderly at risk.                                                                                                                                                                                                                                                                                                                                                                                                                                                                                                                                                                                                                             | [PMID: 12457784]<br>[Shepherd, 2002 Pravastatin in elderly individuals at risk of vascular disease (PROSPER): a randomised controlled trial]                                                                                              |                         |            |
| <b>4</b> WGHS                           | Women's Genome Health Study                                                                     | Cohort                              | Population-based                 | North America, primarily US              | NA                    | European               | ≥ 98%     | Self-reported European ancestry confirmed by identity-by-state analysis using ancestry informative SNPs in PLINK.                                                                                                                                                                                                         | 22,330 | A population-based cohort derived from the approximately 72% of women who provided a blood sample in the Women's Health Study, a trial of aspirin and vitamin E in prevention of cardiovascular disease and cancer among middle-aged, female health care professionals. The WGHS now has over 15 years of follow-up for incident clinical events, including bone fracture.                                                                                                                                                                                                                                                                                                                                                                              | [PMID: 18070814]<br>[Ridker, 2008 Women's Genome Health Study Working Group. Rationale, design, and methodology of the Women's Genome Health Study: a genome-wide association study of more than 25,000 initially healthy american women] |                         |            |
| <b>5</b> WHI GeCHIP - Hip Fracture GWAS | Women's Health Initiative Genetic Components of HIP Fracture (GeCHIP) Consortium - Hip Fracture | Case-control                        | Population-based                 | United States                            | Multi-center (n=40)   | Caucasian              | > 95%     | 1) low call rate (<= 95%)<br>2) low agreement rate with duplicate sample (both samples dropped)<br>3) duplicate sample<br>4) identical twins and 1st degree relatives (sample w/ lower call rate dropped)<br>5) chomosomal abnormalities (excessive CNV)<br>6) Missing body weight and height                             | 4,656  | Hip fracture portion of GeCHIP. This is a case control sample from the Women's Health Initiative. All hip fractures in the WHI Clinical Trial (CT) and Observational Study (OS) through Aug2007 were selected and matched to controls. In the OS, controls were matched on on age (+/-1yr), race/ethnicity (exact), enrollment date (+/- 365 days) and current HT use at baseline (exact). For the CT age (+/-1yr), race/ethnicity (exact), earliest randomization date (+/- 365 days), HT use (active vs. placebo, or if not enrolled current HT use at baseline; exact) and CaD use (active vs. placebo vs. not enrolled; exact). Controls were excluded if they self-reported a prior history of postmenopausal fracture (age >= 55 years)           | [PMID: 9492970]<br>[1998, Design of the Women's Health Initiative clinical trial and observational study. The Women's Health Initiative Study Group]                                                                                      |                         |            |



Supplementary Table 19A: Study design

Stage 2: In-silico Replication BMD Loci and Fracture association

| Study      |                              |              |                  |                   |                       |                        | Sample QC |                                            |                                                                   |                                                                                                                                                                                                                                                                                           | References                                                                                         |
|------------|------------------------------|--------------|------------------|-------------------|-----------------------|------------------------|-----------|--------------------------------------------|-------------------------------------------------------------------|-------------------------------------------------------------------------------------------------------------------------------------------------------------------------------------------------------------------------------------------------------------------------------------------|----------------------------------------------------------------------------------------------------|
| Short name | Full name                    | Study design | Study base       | Country of origin | City/region of origin | Ethnicity              | Call rate | Other exclusions                           | Total sample size with available GWA and BMD and/or fracture data | Short Study Description                                                                                                                                                                                                                                                                   | References                                                                                         |
| 6 YFS      | CV risk in Young Finns Study | Cohort       | Population-based | Finland           | Multicentre           | North-western European | > 95%     | 1) missing DNA;<br>2) Missing body weight. | 1,586                                                             | One of the largest follow-up studies into cardiovascular risk from childhood to adulthood. The main aim of the Young Finns Study is to determine the contribution made by childhood lifestyle, biological and psychological measures to the risk of cardiovascular diseases in adulthood. | [PMID: 18263651]<br>{Raitakari, 2008 Cohort profile: the cardiovascular risk in Young Finns Study} |

Supplementary Table 19B: Study-specific descriptive statistics

Stage 2: In-silico Replication BMD Loci and Fracture association

| Study                                | Trait                       | Assessment method | Men   |       |      |        |       |       | Women  |       |      |        |       |       |
|--------------------------------------|-----------------------------|-------------------|-------|-------|------|--------|-------|-------|--------|-------|------|--------|-------|-------|
|                                      |                             |                   | N     | mean  | sd   | median | min   | max   | N      | mean  | sd   | median | min   | max   |
| <b>1 AGES</b>                        | Age (yrs)                   | Questionnaire     | 1,351 | 76.5  | 5.3  | 76.0   | 67.0  | 94.0  | 1,865  | 76.3  | 5.6  | 76.0   | 66.0  | 95.0  |
|                                      | BMI (kg/m <sup>2</sup> )    | Measured          | 1,351 | 27.0  | 3.8  | 26.7   | 15.9  | 40.6  | 1,865  | 27.2  | 4.9  | 26.8   | 14.8  | 48.5  |
|                                      | Weight (kg)                 | Measured          | 1,351 | 83.2  | 13.3 | 81.6   | 42.0  | 144.7 | 1,865  | 70.5  | 13.3 | 69.3   | 37.2  | 128.3 |
|                                      | Height (cm)                 | Measured          | 1,351 | 175.4 | 6.2  | 175.2  | 153.1 | 196.4 | 1,865  | 160.9 | 5.8  | 160.9  | 139.3 | 182.6 |
|                                      | LS-BMD (g/cm <sup>2</sup> ) | NA                | NA    | NA    | NA   | NA     | NA    | NA    | NA     | NA    | NA   | NA     | NA    | NA    |
|                                      | FN-BMD (g/cm <sup>2</sup> ) | NA                | NA    | NA    | NA   | NA     | NA    | NA    | NA     | NA    | NA   | NA     | NA    | NA    |
| <b>2 DeCODE insilico</b>             | Age (yrs)                   | NationalRegistry  | 832   | 54.8  | 16.3 | 54.6   | 20.3  | 89.0  | 2,046  | 57.1  | 14.3 | 56.8   | 20.0  | 91.7  |
|                                      | BMI (kg/m <sup>2</sup> )    | Calculated        | 831   | 26.4  | 3.7  | 26.1   | 16.6  | 42.0  | 2,045  | 25.9  | 4.5  | 25.2   | 16.2  | 47.2  |
|                                      | Weight (kg)                 | Measured          | 831   | 84.1  | 13.4 | 82.7   | 46.6  | 129.3 | 2,045  | 70.2  | 12.9 | 68.1   | 34.5  | 124.2 |
|                                      | Height (cm)                 | Measured          | 831   | 178.5 | 6.5  | 178.5  | 155.0 | 203.0 | 2,045  | 164.7 | 6.0  | 165.0  | 133.0 | 185.0 |
|                                      | LS-BMD (g/cm <sup>2</sup> ) | NA                | NA    | NA    | NA   | NA     | NA    | NA    | NA     | NA    | NA   | NA     | NA    | NA    |
|                                      | FN-BMD (g/cm <sup>2</sup> ) | NA                | NA    | NA    | NA   | NA     | NA    | NA    | NA     | NA    | NA   | NA     | NA    | NA    |
| <b>3 PROSPER/PHASE</b>               | Age (yrs)                   | Questionnaire     | 2,524 | 75.0  | 3.3  | 74.5   | 70.2  | 83.3  | 2,718  | 75.7  | 3.4  | 75.4   | 69.4  | 83.4  |
|                                      | BMI (kg/m <sup>2</sup> )    | Measured          | 2,524 | 26.6  | 3.6  | 26.3   | 15.2  | 45.1  | 2,718  | 27.1  | 4.7  | 26.7   | 15.6  | 50.1  |
|                                      | Weight (kg)                 | Measured          | 2,524 | 78.7  | 11.9 | 78.0   | 40.0  | 127.0 | 2,718  | 68.3  | 12.7 | 67.0   | 35.5  | 138.0 |
|                                      | Height (cm)                 | Measured          | 2,524 | 172.1 | 6.7  | 172.0  | 143.0 | 198.0 | 2,718  | 158.8 | 6.6  | 159.0  | 135.0 | 180.0 |
|                                      | LS-BMD (g/cm <sup>2</sup> ) | NA                | NA    | NA    | NA   | NA     | NA    | NA    | NA     | NA    | NA   | NA     | NA    | NA    |
|                                      | FN-BMD (g/cm <sup>2</sup> ) | NA                | NA    | NA    | NA   | NA     | NA    | NA    | NA     | NA    | NA   | NA     | NA    | NA    |
| <b>4 WGHS</b>                        | Age (yrs)                   | Questionnaire     | NA    | NA    | NA   | NA     | NA    | NA    | 22,330 | 54.1  | 7.1  | 52.0   | 38.0  | 89.0  |
|                                      | BMI (kg/m <sup>2</sup> )    | Questionnaire     | NA    | NA    | NA   | NA     | NA    | NA    | 22,330 | 25.9  | 5.0  | 24.9   | 14.2  | 59.6  |
|                                      | Weight (kg)                 | Questionnaire     | NA    | NA    | NA   | NA     | NA    | NA    | 22,330 | 70.0  | 14.2 | 68.0   | 38.6  | 175.1 |
|                                      | Height (cm)                 | Questionnaire     | NA    | NA    | NA   | NA     | NA    | NA    | 22,330 | 164   | 6.0  | 165    | 13    | 201   |
|                                      | LS-BMD (g/cm <sup>2</sup> ) | NA                | NA    | NA    | NA   | NA     | NA    | NA    | NA     | NA    | NA   | NA     | NA    | NA    |
|                                      | FN-BMD (g/cm <sup>2</sup> ) | NA                | NA    | NA    | NA   | NA     | NA    | NA    | NA     | NA    | NA   | NA     | NA    | NA    |
| <b>WHI GeCHIP<br/>- Hip Fracture</b> |                             |                   |       |       |      |        |       |       |        |       |      |        |       |       |
| <b>5 GWAS</b>                        | Age (yrs)                   | Questionnaire     | NA    | NA    | NA   | NA     | NA    | NA    | 4,656  | 69.0  | 6.5  | 70.0   | 50.0  | 79.0  |
|                                      | BMI (kg/m <sup>2</sup> )    | Measured          | NA    | NA    | NA   | NA     | NA    | NA    | 4,655  | 27.0  | 5.5  | 26.0   | 13.4  | 69.4  |
|                                      | Weight (kg)                 | Measured          | NA    | NA    | NA   | NA     | NA    | NA    | 4,656  | 70.5  | 14.9 | 68.1   | 37.5  | 171.5 |
|                                      | Height (cm)                 | Measured          | NA    | NA    | NA   | NA     | NA    | NA    | 4,656  | 161.6 | 6.5  | 161.5  | 116.0 | 183.4 |
|                                      | LS-BMD (g/cm <sup>2</sup> ) | NA                | NA    | NA    | NA   | NA     | NA    | NA    | NA     | NA    | NA   | NA     | NA    | NA    |
|                                      | FN-BMD (g/cm <sup>2</sup> ) | NA                | NA    | NA    | NA   | NA     | NA    | NA    | NA     | NA    | NA   | NA     | NA    | NA    |
| <b>6 YFS</b>                         | Age (yrs)                   | Questionnaire     | 185   | 37.5  | 5.0  | 37.0   | 27.0  | 46.0  | 238    | 37.6  | 5.2  | 37.0   | 27.0  | 46.0  |
|                                      | BMI (kg/m <sup>2</sup> )    | Measured          | 180   | 26.4  | 4.1  | 26.1   | 17.9  | 41.2  | 228    | 25.5  | 5.2  | 24.2   | 16.6  | 58.8  |
|                                      | Weight (kg)                 | Measured          | 180   | 85.7  | 15.2 | 84.0   | 54.0  | 136.0 | 228    | 70.5  | 15.2 | 66.0   | 47.0  | 166.0 |
|                                      | Height (cm)                 | Measured          | 180   | 179.9 | 6.5  | 180.0  | 164.0 | 197.0 | 228    | 166.3 | 5.6  | 166.0  | 151.0 | 184.0 |
|                                      | LS-BMD (g/cm <sup>2</sup> ) | Prodigy           | 185   | 1.2   | 0.2  | 1.2    | 0.8   | 1.7   | 238    | 1.2   | 0.2  | 1.2    | 0.8   | 1.6   |
|                                      | FN-BMD (g/cm <sup>2</sup> ) | Prodigy           | 185   | 1.0   | 0.2  | 1.0    | 0.7   | 1.9   | 238    | 1.0   | 0.1  | 1.0    | 0.6   | 1.4   |

## Supplementary Table 19C: Study descriptives fracture

### Stage 2: In-silico Replication BMD Loci and Fracture association

| Study                                | Trait                   | Assessment method                                          | Men        |                | Women      |                |
|--------------------------------------|-------------------------|------------------------------------------------------------|------------|----------------|------------|----------------|
|                                      |                         |                                                            | Fracture N | Non-fracture N | Fracture N | Non-fracture N |
| <b>1 AGES</b>                        | All fractures           | Medical and radiographic records                           | 448        | 892            | 1,011      | 834            |
|                                      | Non-vertebral fractures | NA                                                         | NA         | NA             | NA         | NA             |
|                                      | Vertebral fractures     | NA                                                         | NA         | NA             | NA         | NA             |
| <b>2 DeCODE insilico</b>             | All fractures           | Medical records, radiographic documentation, questionnaire | 532        | 6,980          | 1,878      | 7,864          |
|                                      | Non-vertebral fractures | Medical records, questionnaire                             | 276        | 418            | 1,785      | 3,736          |
|                                      | Vertebral fractures     | NA                                                         | NA         | NA             | NA         | NA             |
| <b>3 PROSPER/PHASE</b>               | All fractures           | Medical records                                            | 117        | 2,407          | 309        | 2,409          |
|                                      | Non-vertebral fractures | NA                                                         | NA         | NA             | NA         | NA             |
|                                      | Vertebral fractures     | NA                                                         | NA         | NA             | NA         | NA             |
| <b>4 WGHS</b>                        | All fractures           | Questionnaire                                              | NA         | NA             | 1,795      | 20,535         |
|                                      | Non-vertebral fractures | NA                                                         | NA         | NA             | NA         | NA             |
|                                      | Vertebral fractures     | NA                                                         | NA         | NA             | NA         | NA             |
| <b>WHI GeCHIP<br/>- Hip Fracture</b> |                         |                                                            | NA         | NA             | 2,166      | 2,490          |
| <b>5 GWAS</b>                        | All fractures           | Medical records                                            | NA         | NA             | 2,166      | 2,490          |
|                                      | Non-vertebral fractures | Medical records                                            | NA         | NA             | 2,166      | 2,490          |
|                                      | Vertebral fractures     | NA                                                         | NA         | NA             | NA         | NA             |
| <b>6 YFS</b>                         | All fractures           | Medical records                                            | 96         | 603            | 106        | 781            |
|                                      | Non-vertebral fractures | Medical records                                            | NA         | NA             | NA         | NA             |
|                                      | Vertebral fractures     | Medical records and Radiographic                           | NA         | NA             | NA         | NA             |

## Supplementary Table 19D: Genotyping/Imputation

### Stage 2: In-silico Replication BMD Loci and Fracture association

| Cohort                                  | Genotyping                                     |                            |                    |            |                    |                          | Imputation          |                    |                     | Association analyses |                   |       |        |
|-----------------------------------------|------------------------------------------------|----------------------------|--------------------|------------|--------------------|--------------------------|---------------------|--------------------|---------------------|----------------------|-------------------|-------|--------|
|                                         | Platform                                       | Genotype calling algorithm | Inclusion criteria |            |                    | SNPs meeting QC criteria | Imputation software | Inclusion criteria |                     | Analyses software    | No. analyzed SNPs | Men   | Women  |
|                                         |                                                |                            | MAF                | Call rate* | P for HWE          |                          |                     | MAF                | Imputation quality* |                      |                   |       |        |
| <b>1 AGES</b>                           | Illumina Hu370CNV                              | BEadstudio<br>Genecall     | ≥ 1%               | >97%       | > 10 <sup>-6</sup> | 329,804                  | MACH                | ≥1%                | MACH R2 ≥ 0.3       | ProbABEL             | 82                | 1,340 | 1,845  |
| <b>2 DeCODE insilico</b>                | Illumina HH300 and 370CNV                      | BeadStudio                 | > 1%               | > 96%      | > 10 <sup>-6</sup> | 281,410                  | IMPUTE              | ≥1%                | MACH R2 ≥ 0.3       | SNPTEST              | 82                | 1,136 | 6,469  |
| <b>3 PROSPER/PHASE</b>                  | Illumina Beadchip 660K-quad                    | Beadstudio<br>Genecall     | ≥ 1%               | ≥ 97.5%    | > 10 <sup>-6</sup> | 557,192                  | MACH                | ≥1%                | MACH R2 ≥ 0.3       | PLINK                | 82                | 2,524 | 2,718  |
| <b>4 WGHS</b>                           | Illumina/HumanHap300 Duo Plus                  | Beadstudio v3.3            | > 1%               | ≥ 98%      | > 10 <sup>-6</sup> | 339,596                  | MACH                | ≥1%                | MACH R2 ≥ 0.3       | ProbABEL             | 82                | 0     | 22,330 |
| <b>5 WHI GeCHIP - Hip Fracture GWAS</b> | Illumina HumanHap 550K, Illumina HumanHap 610K | Beadstudio<br>Gencall      | > 0.5%             | > 95%      | > 10 <sup>-6</sup> | 499,982                  | MACH                | ≥1%                | MACH R2 ≥ 0.3       | R                    | 82                | 0     | 4,656  |
| <b>6 YFS</b>                            | Illumina Custom BeadChip Human670K             | Illumina                   | > 1%               | > 95%      | > 10 <sup>-6</sup> | 546,677                  | MACH                | ≥1%                | MACH R2 ≥ 0.3       | ProbABEL             | 82                | 1,123 | 1,319  |

Supplementary Table 20A: Study design

Stage 2: De-novo genotyping Replication BMD Loci and Fracture association

| Study            |                                                                                  |                                                        |                                  |                   |                       |                                 |                                                                   |                                                                                                                                                                                                                                                                                                                         |                                                                                                                                                                                                                                                                                                                                                         |
|------------------|----------------------------------------------------------------------------------|--------------------------------------------------------|----------------------------------|-------------------|-----------------------|---------------------------------|-------------------------------------------------------------------|-------------------------------------------------------------------------------------------------------------------------------------------------------------------------------------------------------------------------------------------------------------------------------------------------------------------------|---------------------------------------------------------------------------------------------------------------------------------------------------------------------------------------------------------------------------------------------------------------------------------------------------------------------------------------------------------|
| Short name       | Full name                                                                        | Study design                                           | Study base                       | Country of origin | City/region of origin | Ethnicity                       | Total sample size with DNA and BMD and/or fracture data available | Short Study Description                                                                                                                                                                                                                                                                                                 | References                                                                                                                                                                                                                                                                                                                                              |
| 1 AOGC-GOS       | Anglo-Australasian Osteoporosis Genetics Consortium - Geelong Osteoporosis Study | Population cohort, and case/control for fracture cases | Population based, clinical-based | Australia         | Geelong               | Caucasian (North-west European) | 2,922                                                             | Population-based BMD cohort (from electoral rolls) and case-control for fracture cases; all drawn from Geelong general population of men and women                                                                                                                                                                      | {PMID: 19707703}<br>{Henry, 2010 Bone mineral density reference ranges for Australian men: Geelong Osteoporosis Study};<br>{PMID: 11090233}<br>{Henry, 2000 Prevalence of osteoporosis in Australian women: Geelong Osteoporosis Study}                                                                                                                 |
| 2 AOGC-SHEFFIELD | Anglo-Australasian Osteoporosis Genetics Consortium - Sheffield                  | Cohort                                                 | Population-based                 | UK                | Sheffield             | Caucasian (North-west European) | 4,014                                                             | Large population-based cohort of community-dwelling elderly women aged $\geq 75$ years                                                                                                                                                                                                                                  | {PMID: 17042717}<br>{McCloskey, 2007 Clodronate reduces the incidence of fractures in community-dwelling elderly women unselected for osteoporosis: results of a double-blind, placebo-controlled randomized study}                                                                                                                                     |
| 3 APOSS          | Aberdeen Prospective Osteoporosis Screening Study                                | Cohort                                                 | Population-based                 | UK                | Aberdeen              | North-western European          | 3,268                                                             | APOSS is a longitudinal population-based study of osteoporotic fracture risk assessment in Caucasian women aged 45-54 years of age at baseline.                                                                                                                                                                         | {PMID: 16355284}<br>{Macdonald, 2006 Large-scale population-based study shows no evidence of association between common polymorphism of the VDR gene and BMD in British women}                                                                                                                                                                          |
| 4 AROS           | Aarhus Osteoporosis Study                                                        | Case-control                                           | Clinical-based                   | Denmark           | Aarhus                | Northern European               | 801                                                               | Case-control study                                                                                                                                                                                                                                                                                                      | {PMID: 20508921}<br>{Harsløf, 2010 Genotypes and haplotypes of the estrogen receptor genes, but not the retinoblastoma-interacting zinc finger protein 1 gene are associated with osteoporosis}                                                                                                                                                         |
| 5 AUSTRIOS-A     | Austrios A "Young cohort"                                                        | Cohort                                                 | Population-based                 | Austria           | Graz                  | Central European                | 805                                                               | Men and women with and without osteoporosis                                                                                                                                                                                                                                                                             | {PMID: 16299058}<br>{Gugatschka, 2002 Molecularly-defined lactose malabsorption, milk consumption and anthropometric differences in adult males};<br>{PMID: 14753735}<br>{Obermayer-Pietsch, 2004 Genetic predisposition for adult lactose intolerance and relation to diet, bone density, and bone fractures}                                          |
| 6 AUSTRIOS-B     | Austrios B "old cohort"                                                          | Cohort                                                 | Clinical-based                   | Austria           | Graz                  | Central European                | 2,064                                                             | 95 nursing homes in Austria, patients had to be relatively healthy                                                                                                                                                                                                                                                      | {PMID: 16735485}<br>{Dobnig, 2006 Type 2 diabetes mellitus in nursing home patients: effects on bone turnover, bone mass and fracture risk}                                                                                                                                                                                                             |
| 7 BARCOS         | Barcelona Cohorte Osteoporosis                                                   | Cohort                                                 | Population-based                 | Spain             | Barcelona             | Mediterranean European          | 1,453                                                             | The Barcelona is a cohort study of unrelated women aged 44 years and over that were recruited from the Menopausal Unit of the Hospital del Mar, Barcelona. All of the participants were consecutive, unselected, postmenopausal women who had presented to the outpatient clinic for a baseline visit due to menopause. | {PMID: 17878995}<br>{Bustamante, 2007 Promoter 2 -1025 T/C polymorphism in the RUNX2 gene is associated with femoral neck bmd in Spanish postmenopausal women};<br>{PMID: 17984249}<br>{Bustamante, 2007 Polymorphisms in the interleukin-6 receptor gene are associated with bone mineral density and body mass index in Spanish postmenopausal women} |

Supplementary Table 20A: Study design

Stage 2: De-novo genotyping Replication BMD Loci and Fracture association

| Study           |                                         |                                     |                              |                   |                                                                                             |                        |                                                                   |                                                                                                                                                                                         |                                                                                                                                                                                                                                                                                                                                                                                                                                                                                                     |
|-----------------|-----------------------------------------|-------------------------------------|------------------------------|-------------------|---------------------------------------------------------------------------------------------|------------------------|-------------------------------------------------------------------|-----------------------------------------------------------------------------------------------------------------------------------------------------------------------------------------|-----------------------------------------------------------------------------------------------------------------------------------------------------------------------------------------------------------------------------------------------------------------------------------------------------------------------------------------------------------------------------------------------------------------------------------------------------------------------------------------------------|
| Short name      | Full name                               | Study design                        | Study base                   | Country of origin | City/region of origin                                                                       | Ethnicity              | Total sample size with DNA and BMD and/or fracture data available | Short Study Description                                                                                                                                                                 | References                                                                                                                                                                                                                                                                                                                                                                                                                                                                                          |
| 8 CABRIO-C      | Cantabria-Camargo                       | Cross-sectional                     | Community-based              | Spain             | Santander                                                                                   | Caucasian (Spanish)    | 1,450                                                             | Community-based study designed to evaluate the prevalence of metabolic bone diseases in postmenopausal women and men older than 50 attended at a primary care center in Northern Spain. | {PMID: 20594548}<br>{Olmos, 2010 Bone turnover markers in Spanish adult men The Camargo Cohort Study};<br>{PMID: 19737549}<br>{Martinez, 2009 Bone turnover markers in Spanish postmenopausal women: the Camargo cohort study}                                                                                                                                                                                                                                                                      |
| 9 CABRIO-CC     | Cantabria Osteoporosis Case-control     | Case-control, cross-sectional       | Clinic-based plus volunteers | Spain             | Santander                                                                                   | Caucasian (Spanish)    | 2,321                                                             | Clinic-based study of control individuals and patients with osteoporosis living in Cantabria, a region in Northern Spain                                                                | {PMID: 17118999}<br>{Riancho, 2007 Identification of an aromatase haplotype that is associated with gene expression and postmenopausal osteoporosis};<br>{PMID: 17218734}<br>{Zarrabeitia, 2007 Adiposity, estradiol, and genetic variants of steroid-metabolizing enzymes as determinants of bone mineral density}                                                                                                                                                                                 |
| 10 CAIFOS       | Calcium Intake Fracture Outcome Study   | Cohort, randomized-controlled trial | Population-based             | Australia         | Perth                                                                                       | Caucasian              | 1,347                                                             | Randomized-controlled trial and cohort study                                                                                                                                            | {PMID: 16636212}<br>{Prince, 2006 Effects of calcium supplementation on clinical fracture and bone structure: results of a 5-year, double-blind, placebo-controlled trial in elderly women}                                                                                                                                                                                                                                                                                                         |
| 11 Calex-family | Calex-family study                      | Cohort                              | Population-based, fami       | Finland           | Jyväskylä and its surroundings                                                              | North European         | 647                                                               | The Calex-family study is a family-based study to study Fractures in Puberty - Causes and Implications in Old Age                                                                       | {PMID: 19171028}<br>{Cheng, 2009 Trait-specific tracking and determinants of body composition: a 7-year follow-up study of pubertal growth in girls};<br>{PMID: 19481189}<br>{Cheng, 2009 Low volumetric BMD is linked to upper-limb fracture in pubertal girls and persists into adulthood: a seven-year cohort study};<br>{PMID: 20200961}<br>{Wang, 2010 Familial resemblance and diversity in bone mass and strength in the population are established during the first year of postnatal life} |
| 12 CaMos        | Canadian Multicentre Osteoporosis Study | Cohort                              | Population-based             | Canada            | Vancouver, Calgary, Saskatoon, Hamilton, Toronto, Kingston, Québec City, Halifax, St John's | North-western European | 2,321                                                             | The CaMos Study is a population-based, randomly selected, prospective cohort study from 9 Canadian cities followed for 14 years for osteoporosis-related traits and outcomes.           | {PMID: 11199195}<br>{Tenenhouse, 2000 Estimation of the prevalence of low bone density in Canadian women and men using a population-specific DXA reference standard: the Canadian Multicentre Osteoporosis Study (CaMos)};<br>{PMID: 17129177}<br>{Richards, 2007 Changes to osteoporosis prevalence according to method of risk assessment}<br>{PMID: 17242321}<br>{Richards, 2007 Effect of selective serotonin reuptake inhibitors on the risk of fracture}                                      |

Supplementary Table 20A: Study design

Stage 2: De-novo genotyping Replication BMD Loci and Fracture association

| Study        |                                                               |                 |                                |                   |                            |                           |                                                                   |                                                                                                                                                                                                                                                                                                                                             |                                                                                                                                                                                                                                                                                                                                                                                                                                                        |
|--------------|---------------------------------------------------------------|-----------------|--------------------------------|-------------------|----------------------------|---------------------------|-------------------------------------------------------------------|---------------------------------------------------------------------------------------------------------------------------------------------------------------------------------------------------------------------------------------------------------------------------------------------------------------------------------------------|--------------------------------------------------------------------------------------------------------------------------------------------------------------------------------------------------------------------------------------------------------------------------------------------------------------------------------------------------------------------------------------------------------------------------------------------------------|
| Short name   | Full name                                                     | Study design    | Study base                     | Country of origin | City/region of origin      | Ethnicity                 | Total sample size with DNA and BMD and/or fracture data available | Short Study Description                                                                                                                                                                                                                                                                                                                     | References                                                                                                                                                                                                                                                                                                                                                                                                                                             |
| 13 DECODErep | DeCODE Genetics Study                                         | Cross-sectional | Iceland                        | NA                | NA                         | North-western European    | 3,138                                                             | The study includes 40,000 individuals taking part in various disease projects                                                                                                                                                                                                                                                               | [PMID: 18445777]<br>{Styrkarsdottir, 2008 Multiple genetic loci for bone mineral density and fractures};<br>[PMID: 19079262]<br>{Styrkarsdottir, 2009 Multiple genetic loci for bone mineral density and fractures}                                                                                                                                                                                                                                    |
| 14 DOES      | Dubbo Osteoporosis Epidemiology Study                         | Cohort          | Population-based, family-based | Australia         | Sydney (Dubbo)             | Mainly Caucasian          | 1,457                                                             | A cohort study of approximately 2/3rds of the men and women in Dubbo, aged 60 years or older from 1989 every 2 years to the present. Data collected include BMD, life style, medical assessment, medication use and a wide range of health conditions and outcomes. It has been extended recently to include any person older than 20 years | [PMID: 19190316]<br>{Bliuc, 2009 Mortality risk associated with low-trauma osteoporotic fracture and subsequent fracture in men and women};<br>[PMID: 19419321]<br>{Frost, 2009 Timing of repeat BMD measurements: development of an absolute risk-based prognostic model}                                                                                                                                                                             |
| 15 DOPS      | Danish Osteoporosis Prevention Study                          | Cohort          | Population-based               | Denmark           | Aarhus, Odense, Copenhagen | Northern European         | 1,716                                                             | Population-based study of perimenopausal women. The women were followed for 10 years. App. 35% were treated with HRT                                                                                                                                                                                                                        | [PMID: 10340280]<br>{Mosekilde, 1999 The Danish Osteoporosis Prevention Study (DOPS): project design and inclusion of 2000 normal perimenopausal women}                                                                                                                                                                                                                                                                                                |
| 16 EDOS      | Edinburgh Osteoporosis Study                                  | Cross-sectional | Clinical-based                 | UK                | Edinburgh and Lothian      | British (white caucasian) | 2,020                                                             | Clinical referral population of patients assessed for evaluation of osteoporosis                                                                                                                                                                                                                                                            | None                                                                                                                                                                                                                                                                                                                                                                                                                                                   |
| 17 EPICNOR   | European Prospective Investigation into Cancer, Norfolk study | Cohort          | Population-based               | UK                | Norfolk                    | European                  | 1,399                                                             | A random sample of 1,511 men and women in the top decade of age in the 25,000 participant EPIC-Norfolk prospective study were recruited into a bone fragility study with DXA measurements. GWA data were available for 249 participants with BMD measurements who had been entered into a GWAS investigation of obesity.                    | [PMID: 12753873]<br>{Kaptoge, 2003 Effects of gender, anthropometric variables, and aging on the evolution of hip strength in men and women aged over 65};<br>[PMID: 10466767]<br>{Day, 1999 EPIC-Norfolk: study design and characteristics of the cohort. European Prospective Investigation of Cancer};<br>[PMID: 19079261]<br>{Willer, 2009 Six new loci associated with body mass index highlight a neuronal influence on body weight regulation}; |

Supplementary Table 20A: Study design

Stage 2: De-novo genotyping Replication BMD Loci and Fracture association

| Study      |                                                                                                               |                 |                  |                   |                                                  |                        |                                                                   |                                                                                                                                                                                                                                                                                                                                                                                                                                                                                                                              |                                                                                                                                                                                                                                                                                                                                                                                                                                                                                                                                                                                   |
|------------|---------------------------------------------------------------------------------------------------------------|-----------------|------------------|-------------------|--------------------------------------------------|------------------------|-------------------------------------------------------------------|------------------------------------------------------------------------------------------------------------------------------------------------------------------------------------------------------------------------------------------------------------------------------------------------------------------------------------------------------------------------------------------------------------------------------------------------------------------------------------------------------------------------------|-----------------------------------------------------------------------------------------------------------------------------------------------------------------------------------------------------------------------------------------------------------------------------------------------------------------------------------------------------------------------------------------------------------------------------------------------------------------------------------------------------------------------------------------------------------------------------------|
| Short name | Full name                                                                                                     | Study design    | Study base       | Country of origin | City/region of origin                            | Ethnicity              | Total sample size with DNA and BMD and/or fracture data available | Short Study Description                                                                                                                                                                                                                                                                                                                                                                                                                                                                                                      | References                                                                                                                                                                                                                                                                                                                                                                                                                                                                                                                                                                        |
| 18 EPOLOS  | Early risk identification and effective prevention of osteoporosis based bone fractures in Polish population. | Cross-sectional | Population-based | Poland            | Warsaw, Lodz, Poznan, Krakow, Wroclaw, Bydgoszcz | Central European       | 715                                                               | The EPOLOS Study is a population-based, cross-sectional study of unrelated men and women aged 19-81 years, initiated to identify early risk and effective prevention of osteoporosis based bone fractures in Polish population.                                                                                                                                                                                                                                                                                              | {PMID: 20502405}<br>{Skowrońska-Józwiak, 2010 Comparison of selected methods for fracture risk assessment in postmenopausal women: analysis of the Łódź population in the EPOLOS study};<br>[PMID: 20502404]<br>{Skowrońska-Józwiak, 2010 Effect of sex, age, and anthropometric parameters on the size and shape of vertebrae in densitometric morphometry: results of the EPOLOS study};<br>[PMID: 19396748 ]<br>{Skowrońska-Józwiak, 2009 Identification of vertebral deformities in the Polish population by morphometric X-ray absorptiometry - results of the EPOLOS study} |
| 19 EPOS    | European Prospective Osteoporosis Study                                                                       | Cohort          | Population-based | Europe            | 18 centres across 13 countries in Europe         | European               | 2,092                                                             | EPOS was an extension of the European Vertebral Osteoporosis Study (EVOS) study and aimed to quantify incidence of vertebral and non-vertebral fractures. EVOS had recruited some 17,342 men and women aged over 50 years from 36 centres in 19 European countries. Each centre had recruited a random sample of up to 300 men and 300 women from population registers stratified into six 5-year age bands: 50-54, 70-74 and 75+. A total of 7,273 participants from 31 EVOS centres took part in the EPOS follow up study. | {PMID: 8797123}<br>{O'Neill, 1996 The prevalence of vertebral deformity in european men and women: the European Vertebral Osteoporosis Study};<br>[PMID: 10824241]<br>{Ismail, 2000 Validity of self-report of fractures: results from a prospective study in men and women across Europe. EPOS Study Group. European Prospective Osteoporosis Study Group};<br>[PMID: 11918229]<br>{EPOS study group, 2002 Incidence of vertebral fracture in europe: results from the European Prospective Osteoporosis Study (EPOS)}                                                           |
| 20 FLOS    | FLORENCE study                                                                                                | Cohort          | Population-based | Italy             | Florence                                         | Southern European      | 1,000                                                             | The FLOS Study is a population-based cohort study of unrelated men and women aged 50 years and over, collected to perform genetic studies in osteoporosis.                                                                                                                                                                                                                                                                                                                                                                   | {PMID: 11344237}<br>{Masi, 2001 Polymorphism of the aromatase gene in postmenopausal Italian women: distribution and correlation with bone mass and fracture risk}                                                                                                                                                                                                                                                                                                                                                                                                                |
| 21 Geos    | Quebec sample                                                                                                 | Cohort          | Population-based | Canada            | Quebec                                           | North-western European | 2,379                                                             | Population-based sample collected for the study of bone mineral variation. Only women from 18 to 84 years                                                                                                                                                                                                                                                                                                                                                                                                                    | {PMID: 19821770}<br>{Elfassih, 2010 Association with replication between estrogen-related receptor gamma (ESRRgamma) polymorphisms and bone phenotypes in women of European ancestry}                                                                                                                                                                                                                                                                                                                                                                                             |



Supplementary Table 20A: Study design

Stage 2: De-novo genotyping Replication BMD Loci and Fracture association

| Study      |                                                                  |                      |                                  |                   |                                         |                        |                                                                   |                                                                                                                                                                                                                                                                                                                                                     |                                                                                                                                                                                                                                                                                                                                                                                                                                                                                   |
|------------|------------------------------------------------------------------|----------------------|----------------------------------|-------------------|-----------------------------------------|------------------------|-------------------------------------------------------------------|-----------------------------------------------------------------------------------------------------------------------------------------------------------------------------------------------------------------------------------------------------------------------------------------------------------------------------------------------------|-----------------------------------------------------------------------------------------------------------------------------------------------------------------------------------------------------------------------------------------------------------------------------------------------------------------------------------------------------------------------------------------------------------------------------------------------------------------------------------|
| Short name | Full name                                                        | Study design         | Study base                       | Country of origin | City/region of origin                   | Ethnicity              | Total sample size with DNA and BMD and/or fracture data available | Short Study Description                                                                                                                                                                                                                                                                                                                             | References                                                                                                                                                                                                                                                                                                                                                                                                                                                                        |
| 22 GEVUR   | Institute of Biochemistry and Genetics Ufa Scientific Centre RAS | Case-control         | Population-based, clinical-based | Russia            | Ufa                                     | Russians, Tatars       | 999                                                               | The GEVUR Study is case-control and population-based, prospective cohort study of unrelated women aged 50 years and over, men with osteoporotic fractures and healthy men                                                                                                                                                                           | [PMID: 15657606] {Laan, 2005 X-chromosome as a marker for population history: linkage disequilibrium and haplotype study in Eurasian populations}; [PMID: 16465065] {Kutuev, 2006 From East to West: patterns of genetic diversity of populations living in four Eurasian regions}; [PMID:18619040] {Selezneva, 2008 Association of polymorphisms and haplotypes in the 5' region of COL1A1 gene with the risk of osteoporotic fractures in Russian women from Volga-Ural region} |
| 23 GROS    | GENETIC ANALYSIS OF OSTEOPOROSIS IN GREECE                       | Cohort, case-control | Population-based, clinical-based | GREECE            | ATHENS                                  | GREEK                  | 606                                                               | The GROS study is a population-based, prospective cohort study of unrelated Greek men and women aged 43 years and over who visited the Department of Orthopaedic Surgery, University Hospital of Thessalia, Larissa, Greece.                                                                                                                        | None                                                                                                                                                                                                                                                                                                                                                                                                                                                                              |
| 24 HCS     | Hertfordshire Cohort Study                                       | Cohort               | Population-based                 | UK                | Hertfordshire county                    | Caucasian              | 2,927                                                             | The Hertfordshire Cohort Study is a population-based cohort study of men and women born between 1931 and 1939 in the county of Hertfordshire, UK. It was initiated to evaluate interactions between the genome, the intrauterine and early postnatal development, and adult diet and lifestyle in the aetiology of chronic disorders in later life. | [PMID: 15964908] {Syddall, 2005 Cohort Profile: The Hertfordshire Cohort Study}                                                                                                                                                                                                                                                                                                                                                                                                   |
| 25 HK      | Chinese Community Elderly Men and Women Cohorts                  | Cohort               | Population-based                 | Hong Kong, China  | Hong Kong, China                        | Chinese                | 3,872                                                             | Two thousand Chinese men and women living in the community, aged 65 years and above, were recruited by posting public advertisements at community centers for the elderly and housing estates in Hong Kong since 2001.                                                                                                                              | [PMID: 20949110]; {Styrkarsdottir, 2010 European bone mineral density loci are also associated with BMD in East-Asian populations}; [PMID: 19766747] {Tang, 2010 Sex-specific effect of Pirin gene on bone mineral density in a cohort of 4000 Chinese}                                                                                                                                                                                                                           |
| 26 KorAMC  | Korean osteoporosis study at Asan Medical Center                 | Cross-sectional      | Clinical-based                   | Korea             | Seoul                                   | East Asian, Korean     | 1,397                                                             | KorAMC study is a hospital registered, cross-sectional study of postmenopausal Korean women.                                                                                                                                                                                                                                                        | [PMID: 17620055] {Koh, 2007 Association of FLT3 polymorphisms with low BMD and risk of osteoporotic fracture in postmenopausal women}                                                                                                                                                                                                                                                                                                                                             |
| 27 LASA    | Longitudinal Aging Study Amsterdam                               | Cohort               | Population-based                 | The Netherlands   | Amsterdam, Zwolle, Oss and surroundings | North-western European | 956                                                               | LASA is an ongoing multidisciplinary cohort study on predictors and consequences of changes in physical, cognitive, emotional and social functioning in older persons.                                                                                                                                                                              | [PMID: 11927198] {Deeg, 2002 Attrition in the Longitudinal Aging Study Amsterdam: The effect of differential inclusion in side studies}                                                                                                                                                                                                                                                                                                                                           |
| 28 ManMc   | Manitoba McGill Fracture Study                                   | Cross-Sectional      | Population-based                 | Canada            | Winnipeg                                | Caucasian (97%)        | 1,105                                                             | The Manitoba-McGill Fracture Study is a population based sample of women experiencing a validated clinical hip or forearm fracture requiring orthopedic intervention.                                                                                                                                                                               | [PMID: 21124974] {Ladouceur, 2010 An Efficient Paradigm for Genetic Epidemiology Cohort Creation}                                                                                                                                                                                                                                                                                                                                                                                 |

Supplementary Table 20A: Study design

Stage 2: De-novo genotyping Replication BMD Loci and Fracture association

| Study          |                                         |                             |                  |                   |                               |                        |                                                                   |                                                                                                                                                                                                                                                                                                                                                                                                                                                                                                                                                                                                                                                                                                                                                                                                                                       |                                                                                                                                                                                                                                                                                                                                                                                                  |
|----------------|-----------------------------------------|-----------------------------|------------------|-------------------|-------------------------------|------------------------|-------------------------------------------------------------------|---------------------------------------------------------------------------------------------------------------------------------------------------------------------------------------------------------------------------------------------------------------------------------------------------------------------------------------------------------------------------------------------------------------------------------------------------------------------------------------------------------------------------------------------------------------------------------------------------------------------------------------------------------------------------------------------------------------------------------------------------------------------------------------------------------------------------------------|--------------------------------------------------------------------------------------------------------------------------------------------------------------------------------------------------------------------------------------------------------------------------------------------------------------------------------------------------------------------------------------------------|
| Short name     | Full name                               | Study design                | Study base       | Country of origin | City/region of origin         | Ethnicity              | Total sample size with DNA and BMD and/or fracture data available | Short Study Description                                                                                                                                                                                                                                                                                                                                                                                                                                                                                                                                                                                                                                                                                                                                                                                                               | References                                                                                                                                                                                                                                                                                                                                                                                       |
| 29 MrOS Sweden | MrOS Sweden                             | Cohort                      | Population-based | Sweden            | Gothenburg, Uppsala and Malmö | Northern European      | 2,922                                                             | The Osteoporotic Fractures in Men (MrOS) study is a multicenter, prospective study including 3,014 elderly men in Sweden, Hong Kong (~2,000), and the United States (~6,000). The MrOS Sweden cohort consist of three sub-cohorts from three different Swedish cities (n=1,005 in Malmö, n=1,010 in Göteborg, and n=999 in Uppsala). Study subjects (men aged 69–80 years) were randomly identified using national population registers, contacted and asked to participate. To be eligible for the study, the subjects had to be able to walk without assistance, provide self-reported data, and sign an informed consent; there were no other exclusion criteria. The study was approved by the ethics committees at the Universities of Gothenburg, Lund, and Uppsala. Informed consent was obtained from all study participants. | [PMID: 16598372]<br>{Mellström, 2006 Free testosterone is an independent predictor of BMD and prevalent fractures in elderly men: MrOS Sweden}                                                                                                                                                                                                                                                   |
| 30 NOSOS       | North of Scotland Osteoporosis Study    | Cohort                      | Population-based | UK                | Aberdeen, Dingwall            | North-western European | 1,293                                                             | NOSOS is a population-based osteoporosis screening programme of postmenopausal females aged 60-82 years of age at baseline.                                                                                                                                                                                                                                                                                                                                                                                                                                                                                                                                                                                                                                                                                                           | [PMID: 18633668]<br>{Mavroei, 2009 Physical activity and dietary calcium interactions in bone mass in Scottish postmenopausal women};<br>[PMID: 20966103]<br>{Judson, 2010 The Functional ACTN3 577X Variant Increases the Risk of Falling in Older Females: Results From Two Large Independent Cohort Studies}                                                                                  |
| 31 OAS         | Odense Androgen Study                   | Cohort                      | Population-based | Denmark           | Odense                        | Scandinavians          | 600                                                               | Population-based study on Danish men aged 60-74 years. Follow-up on incident clinical fractures (from inclusion until dec 2010)                                                                                                                                                                                                                                                                                                                                                                                                                                                                                                                                                                                                                                                                                                       | Clinicaltrials.gov identifier: NCT00155961                                                                                                                                                                                                                                                                                                                                                       |
| 32 OSTEOS      | Osteoporosis: SNPs To Environment Study | Cross-sectional             | Population-based | Greece            | Athens                        | Mediterranean          | 629                                                               | OSTEOS is a cross-sectional study of unrelated women, aimed to assess genetic and environmental factors, especially nutrition, and their possible interactions on BMD                                                                                                                                                                                                                                                                                                                                                                                                                                                                                                                                                                                                                                                                 | [PMID: 21115334]<br>{Stathopoulou, 2010 The role of vitamin D receptor gene polymorphisms in the bone mineral density of Greek postmenopausal women with low calcium intake};<br>[PMID: 20630166]<br>{Stathopoulou, 2010 Low-density lipoprotein receptor-related protein 5 polymorphisms associate with bone mineral density in Greek postmenopausal women. An interaction with calcium intake} |
| 33 PERF        | Prospective Epidemiological Risk Factor | Randomized-controlled trial | Clinical-based   | Denmark           | Copenhagen                    | North-western European | 3,973                                                             | The Prospective Epidemiological Risk Factor (PERF) Study is based on subjects who were screened for or enrolled into RCT to identify genetic and other risk factors of diseases in the elderly                                                                                                                                                                                                                                                                                                                                                                                                                                                                                                                                                                                                                                        | [PMID: 17109061]<br>{Bagger, 2006 Links between cardiovascular disease and osteoporosis in postmenopausal women: serum lipids or atherosclerosis per se?}                                                                                                                                                                                                                                        |

Supplementary Table 20A: Study design

Stage 2: De-novo genotyping Replication BMD Loci and Fracture association

| Study               |                                                                                        |                     |                  |                   |                       |                  |                                                                   |                                                                                                                                                                                                                                                                                                                                                                                    |                                                                                                                                                                                                                                                                                                                                                                                                                                                                                                          |
|---------------------|----------------------------------------------------------------------------------------|---------------------|------------------|-------------------|-----------------------|------------------|-------------------------------------------------------------------|------------------------------------------------------------------------------------------------------------------------------------------------------------------------------------------------------------------------------------------------------------------------------------------------------------------------------------------------------------------------------------|----------------------------------------------------------------------------------------------------------------------------------------------------------------------------------------------------------------------------------------------------------------------------------------------------------------------------------------------------------------------------------------------------------------------------------------------------------------------------------------------------------|
| Short name          | Full name                                                                              | Study design        | Study base       | Country of origin | City/region of origin | Ethnicity        | Total sample size with DNA and BMD and/or fracture data available | Short Study Description                                                                                                                                                                                                                                                                                                                                                            | References                                                                                                                                                                                                                                                                                                                                                                                                                                                                                               |
| 34 SLO-PREVAL       | Prevalence of osteoporosis in Slovenia                                                 | Cross-sectional     | Population-based | Slovenia          | Ljubljana             | Central European | 716                                                               | SLO-PREVAL study is a cross-sectional study where premenopausal women aged between 35-50 years and postmenopausal women and men aged over 50 years were included to perform genotype-phenotype association studies.                                                                                                                                                                | [PMID:12213850]<br>{Arko, 2002 Sequence variations in the osteoprotegerin gene promoter in patients with postmenopausal osteoporosis};<br>[PMID:18502820]<br>{Mencej, 2008 Tumour necrosis factor superfamily member 11 gene promoter polymorphisms modulate promoter activity and influence bone mineral density in postmenopausal women with osteoporosis};<br>[PMID:19781675]<br>{Trošt 2010 A microarray based identification of osteoporosis-related genes in primary culture of human osteoblasts} |
| 35 UFO-1            | The Umeå Fracture and Osteoporosis Study                                               | Nested case-cohort  | Population-based | Sweden            | Umeå                  | Caucasians       | 4,317                                                             | The UFO study is a nested case-control study investigating associations between genes, lifestyle and osteoporotic fractures. The study is based on the prospective and populationbased Northern Sweden Health and Disease Study cohort, initiated to assess risk factors for diabetes and cardiovascular disease.                                                                  | [PMID: 20464545]<br>{Englund, 2010 Physical activity in middle-aged women and hip fracture risk: the UFO study};<br>[PMID:14660243]<br>{Hallmans, 2003 Cardiovascular disease and diabetes in the Northern Sweden Health and Disease Study Cohort - evaluation of risk factors and their interactions}                                                                                                                                                                                                   |
| UFO-2               |                                                                                        | Cohort              |                  |                   |                       |                  | 2,022                                                             |                                                                                                                                                                                                                                                                                                                                                                                    |                                                                                                                                                                                                                                                                                                                                                                                                                                                                                                          |
| 36 WHI GeCHIP - BMD | Women's Health Initiative Genetic Components of HIP Fracture (GeCHIP) Consortium - BMD | Quasi-case-control. | Population-based | United States     | Multi-center (n=3)    | Caucasian        | 3,923                                                             | BMD portion of GeCHIP. This is a subsample of the Women's Health Initiative BMD cohort (n=11,488). Measurements were made at 3 of 40 US clinical centers (Pittsburgh PA, Birmingham AL, and Tucson/Phoenix AZ). Women (n=4000) were selected from the WHI BMD cohort with the best/worst hip-Z-score (baseline) and best/worst physical functioning score (last available RAND36). | [ PMID: 14519707]<br>{Cauley, 2003 Effects of estrogen plus progestin on risk of fracture and bone mineral density: the Women's Health Initiative randomized trial}                                                                                                                                                                                                                                                                                                                                      |

Supplementary Table 20B: Study-specific descriptive statistics

Stage 2: De-novo genotyping Replication BMD Loci and Fracture association

| Study                   | Trait                       | Assessment method   | Men   |       |      |        |       |       | Women |       |      |        |       |       |
|-------------------------|-----------------------------|---------------------|-------|-------|------|--------|-------|-------|-------|-------|------|--------|-------|-------|
|                         |                             |                     | N     | mean  | sd   | median | min   | max   | N     | mean  | sd   | median | min   | max   |
| <b>1 AOGC-GOS</b>       | Age (yrs)                   | Questionnaire       | 1,322 | 59.3  | 17.9 | 60.4   | 20.0  | 94.0  | 1,600 | 54.3  | 19.6 | 54.1   | 20.3  | 95.5  |
|                         | BMI (kg/m <sup>2</sup> )    | Calculated          | 1,319 | 27.2  | 4.3  | 26.8   | 17.1  | 49.7  | 1,598 | 26.7  | 5.3  | 25.7   | 15.9  | 53.8  |
|                         | Weight (kg)                 | Measured            | 1,319 | 82.8  | 14.4 | 81.5   | 41.8  | 154.7 | 1,598 | 68.8  | 14.4 | 66.6   | 35.3  | 138.9 |
|                         | Height (cm)                 | Measured            | 1,321 | 174.2 | 7.2  | 174.3  | 153.6 | 201.0 | 1,598 | 160.5 | 7.0  | 160.9  | 132.3 | 186.0 |
|                         | LS-BMD (g/cm <sup>2</sup> ) | Lunar               | 1,310 | 1.3   | 0.2  | 1.2    | 0.6   | 2.1   | 1,598 | 1.1   | 0.2  | 1.1    | 0.6   | 1.9   |
|                         | FN-BMD (g/cm <sup>2</sup> ) | Lunar               | 1,255 | 1.0   | 0.2  | 1.0    | 0.5   | 1.5   | 1,575 | 0.9   | 0.2  | 0.9    | 0.5   | 1.4   |
| <b>2 AOGC-SHEFFIELD</b> | Age (yrs)                   | Questionnaire       | 0     | NA    | NA   | NA     | NA    | NA    | 3,979 | 80.1  | 4.0  | 79.0   | 74.3  | 100.0 |
|                         | BMI (kg/m <sup>2</sup> )    | Calculated          | 0     | NA    | NA   | NA     | NA    | NA    | 3,971 | 26.8  | 4.4  | 26.3   | 15.1  | 47.1  |
|                         | Weight (kg)                 | Measured            | 0     | NA    | NA   | NA     | NA    | NA    | 4,008 | 65.1  | 11.3 | 64.3   | 35.8  | 116.3 |
|                         | Height (cm)                 | Measured            | 0     | NA    | NA   | NA     | NA    | NA    | 3,971 | 155.9 | 6.0  | 155.7  | 134.3 | 178.0 |
|                         | LS-BMD (g/cm <sup>2</sup> ) | Hologic QDR4500A    | 0     | NA    | NA   | NA     | NA    | NA    | 0     | NA    | NA   | NA     | NA    | NA    |
|                         | FN-BMD (g/cm <sup>2</sup> ) | Hologic QDR4500A    | 0     | NA    | NA   | NA     | NA    | NA    | 4,001 | 0.6   | 0.1  | 0.6    | 0.3   | 1.0   |
| <b>3 APOSS</b>          | Age (yrs)                   | Questionnaire       | 0     | NA    | NA   | NA     | NA    | NA    | 3,268 | 48.5  | 2.4  | 48.1   | 44.2  | 56.3  |
|                         | BMI (kg/m <sup>2</sup> )    | Calculated          | 0     | NA    | NA   | NA     | NA    | NA    | 3,261 | 25.4  | 4.4  | 24.5   | 15.2  | 56.9  |
|                         | Weight (kg)                 | Measured            | 0     | NA    | NA   | NA     | NA    | NA    | 3,264 | 66.0  | 12.0 | 63.5   | 40.0  | 146.0 |
|                         | Height (cm)                 | Measured            | 0     | NA    | NA   | NA     | NA    | NA    | 3,264 | 161.3 | 5.9  | 161.0  | 136.0 | 185.0 |
|                         | LS-BMD (g/cm <sup>2</sup> ) | Norland             | 0     | NA    | NA   | NA     | NA    | NA    | 3,264 | 1.1   | 0.2  | 1.0    | 0.6   | 2.0   |
|                         | FN-BMD (g/cm <sup>2</sup> ) | Norland             | 0     | NA    | NA   | NA     | NA    | NA    | 3,263 | 0.9   | 0.1  | 0.9    | 0.5   | 1.4   |
| <b>4 AROS</b>           | Age (yrs)                   | Social security     | 176   | 54.3  | 15.7 | 55.0   | 19.0  | 85.0  | 621   | 61.8  | 12.9 | 65.0   | 20.0  | 87.0  |
|                         | BMI (kg/m <sup>2</sup> )    | Calculated          | 143   | 25.2  | 3.7  | 24.7   | 17.4  | 36.5  | 547   | 24.4  | 4.1  | 23.9   | 15.7  | 51.2  |
|                         | Weight (kg)                 | Measured            | 145   | 78.1  | 12.4 | 76.2   | 54.5  | 119.0 | 551   | 63.8  | 11.0 | 62.8   | 38.6  | 118.4 |
|                         | Height (cm)                 | Measured            | 144   | 176.2 | 7.4  | 176.0  | 158.0 | 203.0 | 548   | 161.7 | 6.7  | 162.0  | 143.0 | 194.0 |
|                         | LS-BMD (g/cm <sup>2</sup> ) | Hologic and Norland | 173   | 0.9   | 0.2  | 0.9    | 0.5   | 1.4   | 603   | 0.8   | 0.2  | 0.8    | 0.5   | 1.5   |
|                         | FN-BMD (g/cm <sup>2</sup> ) | Hologic and Norland | 173   | 0.7   | 0.1  | 0.7    | 0.5   | 1.2   | 600   | 0.7   | 0.1  | 0.6    | 0.3   | 1.1   |
| <b>5 AUSTRIOS-A</b>     | Age (yrs)                   | Questionnaire       | 271   | 56.6  | 12.0 | 58.0   | 22.0  | 77.0  | 534   | 47.1  | 15.8 | 45.5   | 18.0  | 85.0  |
|                         | BMI (kg/m <sup>2</sup> )    | Calculated          | 268   | 26.7  | 3.6  | 26.0   | 18.9  | 37.8  | 496   | 23.7  | 3.9  | 22.8   | 16.0  | 39.0  |
|                         | Weight (kg)                 | Measured            | 268   | 83.4  | 12.1 | 82.0   | 58.0  | 125.0 | 496   | 63.9  | 10.6 | 62.0   | 36.0  | 106.0 |
|                         | Height (cm)                 | Measured            | 268   | 176.7 | 6.6  | 177.0  | 160.0 | 197.0 | 496   | 164.2 | 6.3  | 164.0  | 148.0 | 183.0 |
|                         | LS-BMD (g/cm <sup>2</sup> ) | Hologic             | 262   | 1.0   | 0.2  | 1.0    | 0.7   | 1.5   | 522   | 0.9   | 0.1  | 0.9    | 0.5   | 1.7   |
|                         | FN-BMD (g/cm <sup>2</sup> ) | Hologic             | 265   | 0.8   | 0.1  | 0.8    | 0.6   | 1.2   | 522   | 0.7   | 0.1  | 0.7    | 0.3   | 1.2   |
| <b>6 AUSTRIOS-B</b>     | Age (yrs)                   | Questionnaire       | 327   | 84.3  | 5.7  | 85.0   | 69.0  | 101.0 | 1,737 | 83.9  | 6.2  | 85.0   | 68.0  | 103.0 |
|                         | BMI (kg/m <sup>2</sup> )    | Calculated          | 311   | 25.1  | 4.0  | 24.7   | 15.0  | 37.3  | 1,637 | 25.7  | 4.8  | 25.2   | 13.8  | 46.1  |
|                         | Weight (kg)                 | Measured            | 314   | 68.2  | 12.5 | 67.0   | 39.0  | 113.0 | 1,648 | 60.4  | 12.2 | 60.0   | 31.0  | 111.0 |
|                         | Height (cm)                 | Measured            | 312   | 164.9 | 8.2  | 166.0  | 140.0 | 185.0 | 1,645 | 153.3 | 7.4  | 154.0  | 125.0 | 198.0 |
|                         | LS-BMD (g/cm <sup>2</sup> ) | NA                  | 0     | NA    | NA   | NA     | NA    | NA    | 0     | NA    | NA   | NA     | NA    | NA    |
|                         | FN-BMD (g/cm <sup>2</sup> ) | NA                  | 0     | NA    | NA   | NA     | NA    | NA    | 0     | NA    | NA   | NA     | NA    | NA    |
| <b>7 BARCOS</b>         | Age (yrs)                   | Questionnaire       | 0     | NA    | NA   | NA     | NA    | NA    | 1,451 | 65.5  | 9.1  | 65.0   | 35.0  | 100.0 |
|                         | BMI (kg/m <sup>2</sup> )    | Calculated          | 0     | NA    | NA   | NA     | NA    | NA    | 1,441 | 26.4  | 4.1  | 26.0   | 17.3  | 52.3  |
|                         | Weight (kg)                 | Measured            | 0     | NA    | NA   | NA     | NA    | NA    | 1,443 | 65.0  | 10.5 | 64.0   | 41.0  | 134.0 |
|                         | Height (cm)                 | Measured            | 0     | NA    | NA   | NA     | NA    | NA    | 1,442 | 156.8 | 6.3  | 156.0  | 135.0 | 180.0 |
|                         | LS-BMD (g/cm <sup>2</sup> ) | Hologic             | 0     | NA    | NA   | NA     | NA    | NA    | 1,443 | 0.9   | 0.1  | 0.8    | 0.5   | 1.4   |
|                         | FN-BMD (g/cm <sup>2</sup> ) | Hologic             | 0     | NA    | NA   | NA     | NA    | NA    | 1,351 | 0.7   | 0.1  | 0.7    | 0.4   | 1.2   |
| <b>8 CABRIO-C</b>       | Age (yrs)                   | Questionnaire       | 543   | 63.9  | 8.5  | 63.0   | 50.0  | 92.0  | 907   | 62.0  | 9.8  | 59.0   | 42.0  | 94.0  |
|                         | BMI (kg/m <sup>2</sup> )    | Calculated          | 543   | 28.7  | 3.2  | 28.5   | 18.8  | 41.0  | 887   | 28.3  | 4.7  | 27.6   | 17.7  | 47.1  |
|                         | Weight (kg)                 | Measured            | 543   | 81.5  | 11.0 | 80.0   | 44.5  | 118.4 | 887   | 68.7  | 12.0 | 67.0   | 42.0  | 119.0 |
|                         | Height (cm)                 | Measured            | 543   | 168.2 | 6.1  | 168.0  | 150.0 | 189.0 | 889   | 155.9 | 6.0  | 156.0  | 138.0 | 188.0 |
|                         | LS-BMD (g/cm <sup>2</sup> ) | Hologic             | 535   | 1.0   | 0.2  | 1.0    | 0.6   | 1.7   | 896   | 0.9   | 0.1  | 0.9    | 0.6   | 1.4   |
|                         | FN-BMD (g/cm <sup>2</sup> ) | Hologic             | 529   | 0.8   | 0.1  | 0.8    | 0.4   | 1.2   | 897   | 0.7   | 0.1  | 0.7    | 0.4   | 1.1   |
| <b>9 CABRIO-CC</b>      | Age (yrs)                   | Questionnaire       | 538   | 73.3  | 11.9 | 74.0   | 39.0  | 100.0 | 1,771 | 74.5  | 12.3 | 75.0   | 43.0  | 104.0 |

Supplementary Table 20B: Study-specific descriptive statistics

Stage 2: De-novo genotyping Replication BMD Loci and Fracture association

| Study                  | Trait                       | Assessment method     | Men |       |      |        |       | Women |       |       |      |        |       |       |
|------------------------|-----------------------------|-----------------------|-----|-------|------|--------|-------|-------|-------|-------|------|--------|-------|-------|
|                        |                             |                       | N   | mean  | sd   | median | min   | max   | N     | mean  | sd   | median | min   | max   |
|                        | BMI (kg/m <sup>2</sup> )    | Calculated            | 326 | 28.1  | 3.5  | 27.9   | 17.1  | 41.8  | 991   | 27.1  | 4.2  | 26.8   | 16.0  | 45.8  |
|                        | Weight (kg)                 | Measured              | 326 | 78.1  | 11.4 | 78.0   | 46.0  | 137.0 | 995   | 65.0  | 10.4 | 64.0   | 36.0  | 110.0 |
|                        | Height (cm)                 | Measured              | 326 | 166.7 | 6.8  | 167.0  | 145.0 | 192.0 | 992   | 154.7 | 6.1  | 155.0  | 138.0 | 178.0 |
|                        | LS-BMD (g/cm <sup>2</sup> ) | Hologic               | 279 | 1.0   | 0.1  | 1.0    | 0.5   | 1.4   | 923   | 0.8   | 0.2  | 0.8    | 0.5   | 1.4   |
|                        | FN-BMD (g/cm <sup>2</sup> ) | Hologic               | 280 | 0.8   | 0.1  | 0.8    | 0.5   | 1.3   | 926   | 0.7   | 0.1  | 0.7    | 0.4   | 1.1   |
| <b>10 CAIFOS</b>       | Age (yrs)                   | Questionnaire         | 0   | NA    | NA   | NA     | NA    | NA    | 1,347 | 80.2  | 2.7  | 80.0   | 75.0  | 87.0  |
|                        | BMI (kg/m <sup>2</sup> )    | Measured              | 0   | NA    | NA   | NA     | NA    | NA    | 1,135 | 27.2  | 4.7  | 26.8   | 15.7  | 48.2  |
|                        | Weight (kg)                 | Measured              | 0   | NA    | NA   | NA     | NA    | NA    | 1,135 | 67.6  | 12.1 | 65.9   | 39.6  | 114.4 |
|                        | Height (cm)                 | Measured              | 0   | NA    | NA   | NA     | NA    | NA    | 1,137 | 157.5 | 6.0  | 158.0  | 115.0 | 178.0 |
|                        | LS-BMD (g/cm <sup>2</sup> ) | Hologic               | 0   | NA    | NA   | NA     | NA    | NA    | 1,082 | 1.0   | 0.2  | 0.9    | 0.5   | 1.7   |
|                        | FN-BMD (g/cm <sup>2</sup> ) | Hologic               | 0   | NA    | NA   | NA     | NA    | NA    | 1,043 | 0.7   | 0.1  | 0.7    | 0.4   | 1.1   |
| <b>11 CALEX</b>        | Age (yrs)                   | Questionnaire         | 190 | 55.2  | 15.1 | 52.3   | 19.9  | 87.3  | 457   | 46.0  | 19.0 | 47.4   | 18.0  | 91.7  |
|                        | BMI (kg/m <sup>2</sup> )    | Measured              | 190 | 26.3  | 3.3  | 26.1   | 18.3  | 37.0  | 457   | 25.3  | 4.5  | 24.6   | 16.0  | 47.2  |
|                        | Weight (kg)                 | Measured              | 190 | 81.4  | 10.7 | 80.8   | 56.8  | 108.6 | 457   | 68.1  | 12.3 | 66.5   | 46.1  | 127.0 |
|                        | Height (cm)                 | Measured              | 190 | 175.9 | 6.5  | 176.0  | 154.0 | 194.0 | 457   | 164.2 | 6.2  | 164.0  | 148.0 | 180.0 |
|                        | LS-BMD (g/cm <sup>2</sup> ) | Lunar                 | 189 | 1.2   | 0.2  | 1.2    | 0.8   | 1.9   | 451   | 1.2   | 0.2  | 1.2    | 0.7   | 1.8   |
|                        | FN-BMD (g/cm <sup>2</sup> ) | Lunar                 | 189 | 1.0   | 0.2  | 1.0    | 0.7   | 1.5   | 450   | 1.0   | 0.1  | 1.0    | 0.6   | 1.5   |
| <b>12 CAMOS</b>        | Age (yrs)                   | Questionnaire         | 705 | 65.4  | 16.6 | 69.0   | 18.0  | 95.0  | 1,616 | 67.3  | 14.9 | 70.0   | 18.0  | 99.0  |
|                        | BMI (kg/m <sup>2</sup> )    | Measured              | 701 | 26.9  | 3.8  | 26.6   | 18.0  | 40.6  | 1,600 | 26.9  | 5.2  | 26.2   | 16.5  | 64.3  |
|                        | Weight (kg)                 | Measured              | 701 | 81.7  | 13.4 | 80.7   | 47.7  | 126.5 | 1,601 | 69.4  | 13.7 | 67.4   | 38.2  | 158.5 |
|                        | Height (cm)                 | Measured              | 701 | 174.1 | 7.1  | 174.0  | 151.0 | 198.0 | 1,600 | 160.6 | 6.4  | 160.0  | 141.0 | 182.9 |
|                        | LS-BMD (g/cm <sup>2</sup> ) | Hologic or Lunar      | 705 | 1.0   | 0.2  | 1.0    | 0.6   | 1.6   | 1,603 | 1.0   | 0.2  | 1.0    | 0.5   | 1.6   |
|                        | FN-BMD (g/cm <sup>2</sup> ) | Hologic or Lunar      | 704 | 0.8   | 0.1  | 0.8    | 0.5   | 1.4   | 1,599 | 0.7   | 0.1  | 0.7    | 0.4   | 1.3   |
| <b>13 DECODErep</b>    | Age (yrs)                   | National registry     | 910 | 55.5  | 16.3 | 55.6   | 20.3  | 89.0  | 2,228 | 57.5  | 14.3 | 57.7   | 20.0  | 97.0  |
|                        | BMI (kg/m <sup>2</sup> )    | Measured              | 910 | 26.4  | 3.7  | 26.2   | 16.6  | 42.0  | 2,228 | 25.9  | 4.5  | 25.3   | 14.8  | 47.2  |
|                        | Weight (kg)                 | Measured              | 910 | 84.3  | 13.5 | 83.0   | 46.6  | 129.3 | 2,228 | 70.1  | 12.7 | 68.5   | 34.5  | 124.2 |
|                        | Height (cm)                 | Measured              | 910 | 178.5 | 6.5  | 178.5  | 155.0 | 203.0 | 2,228 | 164.7 | 5.9  | 165.0  | 133.0 | 185.0 |
|                        | LS-BMD (g/cm <sup>2</sup> ) | Hologic               | 779 | 1.0   | 0.2  | 1.0    | 0.6   | 1.6   | 1,877 | 1.0   | 0.2  | 1.0    | 0.5   | 1.6   |
|                        | FN-BMD (g/cm <sup>2</sup> ) | Hologic               | 763 | 0.8   | 0.2  | 0.8    | 0.4   | 1.3   | 1,857 | 0.8   | 0.1  | 0.7    | 0.4   | 1.2   |
| <b>14 DOES</b>         | Age (yrs)                   | Questionnaire         | 569 | 75.6  | 5.5  | 75.0   | 61.0  | 90.0  | 888   | 76.2  | 6.3  | 76.0   | 60.0  | 99.0  |
|                        | BMI (kg/m <sup>2</sup> )    | Measured              | 569 | 26.7  | 4.0  | 26.3   | 17.7  | 44.4  | 888   | 26.1  | 5.0  | 25.8   | 14.3  | 56.0  |
|                        | Weight (kg)                 | Measured              | 569 | 78.4  | 13.2 | 77.0   | 43.0  | 128.0 | 888   | 65.2  | 13.1 | 65.0   | 33.0  | 128.0 |
|                        | Height (cm)                 | Measured              | 569 | 171.3 | 6.3  | 171.0  | 154.0 | 196.0 | 888   | 157.8 | 6.1  | 158.0  | 139.0 | 186.0 |
|                        | LS-BMD (g/cm <sup>2</sup> ) | Lunar DPX and Prodigy | 567 | 1.3   | 0.2  | 1.3    | 0.7   | 2.1   | 883   | 1.0   | 0.2  | 1.0    | 0.4   | 1.8   |
|                        | FN-BMD (g/cm <sup>2</sup> ) | Lunar DPX and Prodigy | 557 | 0.9   | 0.2  | 0.9    | 0.4   | 1.5   | 872   | 0.7   | 0.1  | 0.7    | 0.4   | 1.1   |
| <b>15 DOPS</b>         | Age (yrs)                   | Social security       | 0   | NA    | NA   | NA     | NA    | NA    | 1,716 | 50.6  | 2.8  | 50.5   | 43.7  | 59.0  |
|                        | BMI (kg/m <sup>2</sup> )    | Calculated            | 0   | NA    | NA   | NA     | NA    | NA    | 1,715 | 25.0  | 4.3  | 24.2   | 12.8  | 48.3  |
|                        | Weight (kg)                 | Measured              | 0   | NA    | NA   | NA     | NA    | NA    | 1,715 | 67.7  | 11.8 | 65.6   | 34.0  | 135.5 |
|                        | Height (cm)                 | Measured              | 0   | NA    | NA   | NA     | NA    | NA    | 1,715 | 164.5 | 6.0  | 164.5  | 147.0 | 189.0 |
|                        | LS-BMD (g/cm <sup>2</sup> ) | Hologic               | 0   | NA    | NA   | NA     | NA    | NA    | 1,710 | 1.0   | 0.1  | 1.0    | 0.6   | 1.6   |
|                        | FN-BMD (g/cm <sup>2</sup> ) | Hologic               | 0   | NA    | NA   | NA     | NA    | NA    | 1,702 | 0.8   | 0.1  | 0.8    | 0.5   | 1.3   |
| <b>16 EDOS</b>         | Age (yrs)                   | Questionnaire         | 370 | 62.4  | 13.6 | 62.4   | 18.3  | 93.1  | 1,645 | 66.2  | 12.4 | 67.6   | 20.5  | 94.3  |
|                        | BMI (kg/m <sup>2</sup> )    | Measured              | 354 | 26.4  | 5.3  | 26.0   | 14.9  | 51.6  | 1,603 | 26.0  | 5.1  | 25.1   | 14.9  | 52.5  |
|                        | Weight (kg)                 | Measured              | 354 | 77.3  | 17.2 | 76.0   | 40.6  | 144.8 | 1,603 | 65.1  | 13.7 | 63.2   | 40.0  | 128.9 |
|                        | Height (cm)                 | Measured              | 357 | 170.6 | 8.8  | 171.0  | 100.8 | 200.0 | 1,631 | 158.0 | 7.1  | 158.0  | 128.5 | 190.0 |
|                        | LS-BMD (g/cm <sup>2</sup> ) | Hologic               | 353 | 0.9   | 0.2  | 0.8    | 0.4   | 1.6   | 1,613 | 0.8   | 0.2  | 0.8    | 0.4   | 1.5   |
|                        | FN-BMD (g/cm <sup>2</sup> ) | Hologic               | 309 | 0.7   | 0.1  | 0.7    | 0.3   | 1.2   | 1,453 | 0.6   | 0.1  | 0.6    | 0.3   | 1.2   |
| <b>17 EPIC Norfolk</b> | Age (yrs)                   | Questionnaire         | 680 | 72.5  | 3.1  | 72.1   | 66.9  | 79.3  | 719   | 72.4  | 3.2  | 72.3   | 60.0  | 85.0  |
|                        | BMI (kg/m <sup>2</sup> )    | Measured              | 680 | 26.8  | 3.3  | 26.7   | 17.5  | 39.2  | 710   | 26.8  | 4.3  | 26.4   | 17.8  | 45.7  |

Supplementary Table 20B: Study-specific descriptive statistics

Stage 2: De-novo genotyping Replication BMD Loci and Fracture association

| Study            | Trait                       | Assessment method                                                                     | Men   |       |      |        |       | Women |       |       |      |        |       |       |
|------------------|-----------------------------|---------------------------------------------------------------------------------------|-------|-------|------|--------|-------|-------|-------|-------|------|--------|-------|-------|
|                  |                             |                                                                                       | N     | mean  | sd   | median | min   | max   | N     | mean  | sd   | median | min   | max   |
|                  | Weight (kg)                 | Measured                                                                              | 680   | 79.6  | 10.9 | 78.8   | 48.0  | 128.5 | 710   | 67.9  | 11.3 | 66.8   | 43.0  | 105.5 |
|                  | Height (cm)                 | Measured                                                                              | 680   | 172.3 | 6.3  | 172.0  | 153.0 | 196.0 | 714   | 159.1 | 5.9  | 159.0  | 139.0 | 178.0 |
|                  | LS-BMD (g/cm <sup>2</sup> ) | NA                                                                                    | 0     | NA    | NA   | NA     | NA    | NA    | 0     | NA    | NA   | NA     | NA    | NA    |
|                  | FN-BMD (g/cm <sup>2</sup> ) | Hologic QDR 1000W                                                                     | 674   | 0.8   | 0.1  | 0.8    | 0.5   | 1.5   | 698   | 0.7   | 0.1  | 0.7    | 0.3   | 1.1   |
| <b>18 EPOLOS</b> | Age (yrs)                   | Questionnaire                                                                         | 317   | 50.4  | 16.5 | 50.9   | 19.8  | 80.9  | 398   | 55.5  | 15.6 | 58.5   | 20.0  | 81.6  |
|                  | BMI (kg/m <sup>2</sup> )    | Measured                                                                              | 317   | 26.6  | 4.0  | 26.3   | 17.1  | 39.4  | 397   | 26.7  | 4.9  | 26.4   | 16.4  | 40.9  |
|                  | Weight (kg)                 | Measured                                                                              | 317   | 80.0  | 12.7 | 80.0   | 48.0  | 120.0 | 397   | 68.0  | 12.3 | 67.0   | 40.0  | 109.0 |
|                  | Height (cm)                 | Measured                                                                              | 317   | 173.3 | 7.4  | 173.0  | 151.0 | 190.0 | 398   | 159.6 | 6.4  | 160.0  | 128.0 | 176.0 |
|                  | LS-BMD (g/cm <sup>2</sup> ) | Lunar DPX                                                                             | 297   | 1.1   | 0.2  | 1.0    | 0.5   | 2.1   | 367   | 1.0   | 0.2  | 1.0    | 0.5   | 1.7   |
|                  | FN-BMD (g/cm <sup>2</sup> ) | Lunar DPX                                                                             | 298   | 0.9   | 0.2  | 0.9    | 0.4   | 1.6   | 366   | 0.8   | 0.1  | 0.8    | 0.4   | 1.2   |
| <b>19 EPOS</b>   | Age (yrs)                   | Questionnaire                                                                         | 719   | 62.9  | 8.2  | 62.5   | 43.9  | 90.4  | 1,373 | 63.4  | 8.8  | 62.6   | 40.5  | 95.0  |
|                  | BMI (kg/m <sup>2</sup> )    | Measured                                                                              | 661   | 27.6  | 3.7  | 27.4   | 18.2  | 41.4  | 1,176 | 27.5  | 4.7  | 27.0   | 16.8  | 52.9  |
|                  | Weight (kg)                 | Measured                                                                              | 661   | 78.7  | 11.5 | 78.7   | 47.0  | 120.0 | 1,177 | 68.1  | 11.5 | 67.0   | 41.3  | 115.0 |
|                  | Height (cm)                 | Measured                                                                              | 661   | 168.9 | 7.3  | 169.0  | 145.0 | 188.0 | 1,179 | 157.4 | 6.9  | 157.0  | 136.0 | 186.0 |
|                  | LS-BMD (g/cm <sup>2</sup> ) | Hologic (7 centres)<br>/Lunar (5 centres)<br>/Sopa (1 centre)<br>/Norland (2 centres) | 238   | 1.0   | 0.2  | 1.0    | 0.6   | 1.6   | 482   | 0.9   | 0.2  | 0.9    | 0.5   | 1.6   |
|                  | FN-BMD (g/cm <sup>2</sup> ) | Hologic (7 centres) /Lunar                                                            | 513   | 0.8   | 0.1  | 0.8    | 0.4   | 1.4   | 926   | 0.7   | 0.1  | 0.7    | 0.3   | 1.3   |
| <b>20 FLOS</b>   | Age (yrs)                   | Questionnaire                                                                         | 161   | 53.9  | 14.7 | 56.0   | 20.0  | 78.0  | 839   | 60.9  | 12.0 | 62.0   | 19.0  | 89.0  |
|                  | BMI (kg/m <sup>2</sup> )    | Measured                                                                              | 161   | 26.2  | 3.6  | 26.0   | 18.5  | 54.1  | 839   | 24.1  | 3.5  | 23.9   | 15.0  | 44.2  |
|                  | Weight (kg)                 | Measured                                                                              | 161   | 80.8  | 13.6 | 80.0   | 60.0  | 185.0 | 839   | 61.8  | 9.3  | 60.3   | 37.0  | 116.0 |
|                  | Height (cm)                 | Measured                                                                              | 161   | 175.6 | 7.0  | 176.0  | 156.0 | 192.0 | 839   | 160.0 | 6.7  | 160.0  | 138.0 | 181.0 |
|                  | LS-BMD (g/cm <sup>2</sup> ) | Hologic                                                                               | 158   | 1.0   | 0.1  | 1.0    | 0.7   | 1.6   | 835   | 0.9   | 0.2  | 0.9    | 0.4   | 1.6   |
|                  | FN-BMD (g/cm <sup>2</sup> ) | Hologic                                                                               | 139   | 0.8   | 0.2  | 0.8    | 0.3   | 1.1   | 781   | 0.7   | 0.2  | 0.7    | 0.3   | 1.3   |
| <b>21 GEOS</b>   | Age (yrs)                   | Questionnaire                                                                         | 0     | NA    | NA   | NA     | NA    | NA    | 2,379 | 53.8  | 9.6  | 54.0   | 18.0  | 84.0  |
|                  | BMI (kg/m <sup>2</sup> )    | Measured                                                                              | 0     | NA    | NA   | NA     | NA    | NA    | 2,372 | 25.8  | 4.6  | 25.0   | 15.2  | 46.7  |
|                  | Weight (kg)                 | Measured                                                                              | 0     | NA    | NA   | NA     | NA    | NA    | 2,374 | 65.0  | 11.9 | 63.0   | 40.2  | 118.8 |
|                  | Height (cm)                 | Measured                                                                              | 0     | NA    | NA   | NA     | NA    | NA    | 2,377 | 158.6 | 6.0  | 159.0  | 130.0 | 184.0 |
|                  | LS-BMD (g/cm <sup>2</sup> ) | Lunar                                                                                 | 0     | NA    | NA   | NA     | NA    | NA    | 2,377 | 1.1   | 0.2  | 1.1    | 0.6   | 1.8   |
|                  | FN-BMD (g/cm <sup>2</sup> ) | Lunar                                                                                 | 0     | NA    | NA   | NA     | NA    | NA    | 2,376 | 0.9   | 0.1  | 0.9    | 0.4   | 1.4   |
| <b>22 GEVUR</b>  | Age (yrs)                   | Questionnaire                                                                         | 134   | 59.2  | 12.9 | 59.0   | 19.0  | 83.0  | 839   | 62.2  | 8.2  | 61.0   | 40.0  | 85.0  |
|                  | BMI (kg/m <sup>2</sup> )    | Measured                                                                              | 96    | 26.2  | 4.9  | 25.2   | 15.4  | 40.6  | 830   | 27.8  | 4.9  | 27.3   | 14.2  | 45.2  |
|                  | Weight (kg)                 | Measured                                                                              | 96    | 76.2  | 14.0 | 76.0   | 49.0  | 120.0 | 830   | 70.6  | 13.2 | 70.0   | 40.0  | 128.0 |
|                  | Height (cm)                 | Measured                                                                              | 97    | 170.8 | 7.5  | 170.0  | 156.0 | 192.0 | 833   | 159.3 | 6.3  | 159.0  | 134.0 | 185.0 |
|                  | LS-BMD (g/cm <sup>2</sup> ) | Hologic                                                                               | 105   | 0.9   | 0.2  | 0.9    | 0.4   | 1.4   | 194   | 0.9   | 0.2  | 0.9    | 0.5   | 1.4   |
|                  | FN-BMD (g/cm <sup>2</sup> ) | Hologic                                                                               | 99    | 0.9   | 0.2  | 0.8    | 0.3   | 1.2   | 373   | 0.8   | 0.2  | 0.8    | 0.3   | 1.3   |
| <b>23 GROS</b>   | Age (yrs)                   | Questionnaire                                                                         | 83    | 70.2  | 12.8 | 72.0   | 43.0  | 90.0  | 523   | 69.1  | 11.7 | 70.0   | 43.0  | 95.0  |
|                  | BMI (kg/m <sup>2</sup> )    | Measured                                                                              | 83    | 26.3  | 3.9  | 26.0   | 17.3  | 37.9  | 521   | 27.5  | 4.7  | 27.0   | 16.4  | 45.8  |
|                  | Weight (kg)                 | Measured                                                                              | 83    | 71.5  | 12.3 | 71.0   | 40.0  | 120.0 | 521   | 71.7  | 10.9 | 69.0   | 40.0  | 112.0 |
|                  | Height (cm)                 | Measured                                                                              | 83    | 164.8 | 10.4 | 167.0  | 121.0 | 182.0 | 523   | 161.8 | 7.3  | 162.0  | 146.0 | 182.0 |
|                  | LS-BMD (g/cm <sup>2</sup> ) | Varius (Lunar, Hologic)                                                               | 21    | 0.9   | 0.2  | 0.9    | 0.5   | 1.5   | 272   | 0.8   | 0.2  | 0.8    | 0.5   | 1.5   |
|                  | FN-BMD (g/cm <sup>2</sup> ) | Varius (Lunar, Hologic)                                                               | 6     | 0.8   | 0.2  | 0.9    | 0.5   | 1.0   | 55    | 0.8   | 0.1  | 0.8    | 0.5   | 1.2   |
| <b>24 HCS</b>    | Age (yrs)                   | Questionnaire                                                                         | 1,571 | 65.7  | 2.9  | 65.8   | 59.2  | 72.6  | 1,356 | 66.7  | 2.7  | 66.5   | 60.9  | 73.1  |
|                  | BMI (kg/m <sup>2</sup> )    | Measured                                                                              | 1,562 | 27.1  | 3.7  | 26.8   | 16.1  | 49.2  | 1,354 | 27.5  | 4.8  | 27.0   | 15.2  | 48.1  |
|                  | Weight (kg)                 | Measured                                                                              | 1,563 | 82.4  | 12.6 | 81.0   | 45.5  | 144.5 | 1,354 | 71.2  | 13.2 | 70.0   | 40.0  | 135.5 |
|                  | Height (cm)                 | Measured                                                                              | 1,564 | 174.1 | 6.5  | 174.3  | 149.6 | 195.6 | 1,354 | 160.9 | 5.9  | 160.8  | 140.9 | 180.8 |
|                  | LS-BMD (g/cm <sup>2</sup> ) | Hologic                                                                               | 495   | 1.1   | 0.2  | 1.1    | 0.7   | 1.6   | 440   | 0.9   | 0.2  | 0.9    | 0.4   | 1.4   |
|                  | FN-BMD (g/cm <sup>2</sup> ) | Hologic                                                                               | 493   | 0.9   | 0.1  | 0.8    | 0.5   | 1.3   | 440   | 0.7   | 0.1  | 0.7    | 0.5   | 1.1   |

Supplementary Table 20B: Study-specific descriptive statistics

Stage 2: De-novo genotyping Replication BMD Loci and Fracture association

| Study          | Trait                       | Assessment method                               | Men   |       |      |        |       |       | Women |       |      |        |       |       |
|----------------|-----------------------------|-------------------------------------------------|-------|-------|------|--------|-------|-------|-------|-------|------|--------|-------|-------|
|                |                             |                                                 | N     | mean  | sd   | median | min   | max   | N     | mean  | sd   | median | min   | max   |
| 25 HK          | Age (yrs)                   | Questionnaire                                   | 1,888 | 72.4  | 5.0  | 72.0   | 65.0  | 92.0  | 1,984 | 72.6  | 5.4  | 72.0   | 65.0  | 98.0  |
|                | BMI (kg/m <sup>2</sup> )    | Measured                                        | 1,888 | 23.5  | 3.1  | 23.5   | 13.1  | 36.3  | 1,984 | 23.9  | 3.5  | 23.7   | 12.7  | 40.3  |
|                | Weight (kg)                 | Measured                                        | 1,888 | 62.4  | 9.4  | 62.4   | 35.9  | 103.1 | 1,984 | 54.5  | 8.5  | 54.2   | 28.8  | 89.0  |
|                | Height (cm)                 | Measured                                        | 1,888 | 163.1 | 5.8  | 163.1  | 141.9 | 187.2 | 1,984 | 150.9 | 5.3  | 150.8  | 133.7 | 170.3 |
|                | LS-BMD (g/cm <sup>2</sup> ) | Hologic                                         | 1,853 | 0.9   | 0.2  | 0.9    | 0.4   | 1.6   | 1,934 | 0.8   | 0.1  | 0.7    | 0.3   | 1.3   |
|                | FN-BMD (g/cm <sup>2</sup> ) | Hologic                                         | 1,884 | 0.7   | 0.1  | 0.7    | 0.4   | 1.1   | 1,977 | 0.6   | 0.1  | 0.6    | 0.3   | 1.0   |
| 26 KorAMC      | Age (yrs)                   | Questionnaire                                   | 0     | NA    | NA   | NA     | NA    | NA    | 1,397 | 59.5  | 7.4  | 59.0   | 45.0  | 87.0  |
|                | BMI (kg/m <sup>2</sup> )    | Measured                                        | 0     | NA    | NA   | NA     | NA    | NA    | 1,397 | 23.4  | 2.8  | 23.3   | 14.4  | 35.5  |
|                | Weight (kg)                 | Measured                                        | 0     | NA    | NA   | NA     | NA    | NA    | 1,397 | 56.2  | 7.2  | 56.0   | 27.0  | 86.0  |
|                | Height (cm)                 | Measured                                        | 0     | NA    | NA   | NA     | NA    | NA    | 1,397 | 155.0 | 5.3  | 155.0  | 121.0 | 171.0 |
|                | LS-BMD (g/cm <sup>2</sup> ) | Hologic, QDR4500A, ExpertXL, ProdigyAdvance     | 0     | NA    | NA   | NA     | NA    | NA    | 1,387 | 0.9   | 0.2  | 0.9    | 0.4   | 1.5   |
|                | FN-BMD (g/cm <sup>2</sup> ) | Hologic, QDR4500A, Expe                         | 0     | NA    | NA   | NA     | NA    | NA    | 1,387 | 0.7   | 0.1  | 0.7    | 0.3   | 1.1   |
| 27 LASA        | Age (yrs)                   | Questionnaire                                   | 464   | 72.4  | 6.5  | 72.2   | 61.9  | 85.6  | 485   | 72.6  | 6.6  | 72.1   | 61.8  | 85.3  |
|                | BMI (kg/m <sup>2</sup> )    | Measured                                        | 438   | 25.8  | 3.2  | 25.9   | 17.4  | 39.1  | 441   | 27.8  | 4.5  | 27.4   | 16.9  | 45.8  |
|                | Weight (kg)                 | Measured                                        | 440   | 77.9  | 11.3 | 77.0   | 47.0  | 119.0 | 449   | 71.6  | 12.0 | 70.5   | 42.0  | 120.5 |
|                | Height (cm)                 | Measured                                        | 438   | 173.4 | 6.7  | 173.4  | 156.4 | 195.3 | 442   | 160.5 | 6.3  | 160.4  | 141.9 | 177.6 |
|                | LS-BMD (g/cm <sup>2</sup> ) | Hologic QDR 2000                                | 253   | 1.0   | 0.2  | 1.0    | 0.5   | 1.8   | 262   | 0.9   | 0.2  | 0.9    | 0.6   | 1.4   |
|                | FN-BMD (g/cm <sup>2</sup> ) | Hologic QDR 2000                                | 252   | 0.7   | 0.1  | 0.7    | 0.3   | 1.1   | 251   | 0.7   | 0.1  | 0.6    | 0.4   | 1.0   |
| 28 MANMC       | Age (yrs)                   | Questionnaire                                   | 0     | NA    | NA   | NA     | NA    | NA    | 1,105 | 56.4  | 8.6  | 57.0   | 27.0  | 86.0  |
|                | BMI (kg/m <sup>2</sup> )    | Measured                                        | 0     | NA    | NA   | NA     | NA    | NA    | 0     | NA    | NA   | NA     | NA    | NA    |
|                | Weight (kg)                 | Measured                                        | 0     | NA    | NA   | NA     | NA    | NA    | 0     | NA    | NA   | NA     | NA    | NA    |
|                | Height (cm)                 | Measured                                        | 0     | NA    | NA   | NA     | NA    | NA    | 0     | NA    | NA   | NA     | NA    | NA    |
|                | LS-BMD (g/cm <sup>2</sup> ) | NA                                              | 0     | NA    | NA   | NA     | NA    | NA    | 0     | NA    | NA   | NA     | NA    | NA    |
|                | FN-BMD (g/cm <sup>2</sup> ) | NA                                              | 0     | NA    | NA   | NA     | NA    | NA    | 0     | NA    | NA   | NA     | NA    | NA    |
| 29 MrOS Sweden | Age (yrs)                   | Questionnaire                                   | 2,922 | 75.4  | 3.2  | 75.4   | 69.9  | 81.0  | 0     | NA    | NA   | NA     | NA    | NA    |
|                | BMI (kg/m <sup>2</sup> )    | Measured                                        | 2,922 | 26.4  | 3.5  | 26.2   | 13.3  | 44.6  | 0     | NA    | NA   | NA     | NA    | NA    |
|                | Weight (kg)                 | Measured                                        | 2,922 | 80.7  | 12.1 | 79.9   | 37.0  | 138.3 | 0     | NA    | NA   | NA     | NA    | NA    |
|                | Height (cm)                 | Measured                                        | 2,922 | 174.8 | 6.5  | 174.6  | 145.2 | 199.4 | 0     | NA    | NA   | NA     | NA    | NA    |
|                | LS-BMD (g/cm <sup>2</sup> ) | Hologic (Gothenburg), Lunar (Uppsala and Malmö) | 2,893 | 1.2   | 0.2  | 1.1    | 0.6   | 2.0   | 0     | NA    | NA   | NA     | NA    | NA    |
|                | FN-BMD (g/cm <sup>2</sup> ) | Hologic (Gothenburg), Lu                        | 2,814 | 0.9   | 0.1  | 0.8    | 0.4   | 1.4   | 0     | NA    | NA   | NA     | NA    | NA    |
| 30 NOSOS       | Age (yrs)                   | Questionnaire                                   | 0     | NA    | NA   | NA     | NA    | NA    | 1,268 | 69.7  | 5.5  | 69.3   | 60.2  | 82.2  |
|                | BMI (kg/m <sup>2</sup> )    | Measured                                        | 0     | NA    | NA   | NA     | NA    | NA    | 1,291 | 27.0  | 4.6  | 26.6   | 16.2  | 55.2  |
|                | Weight (kg)                 | Measured                                        | 0     | NA    | NA   | NA     | NA    | NA    | 1,291 | 67.8  | 12.3 | 66.5   | 40.0  | 132.5 |
|                | Height (cm)                 | Measured                                        | 0     | NA    | NA   | NA     | NA    | NA    | 1,293 | 158.4 | 6.0  | 158.0  | 131.0 | 177.0 |
|                | LS-BMD (g/cm <sup>2</sup> ) | Lunar                                           | 0     | NA    | NA   | NA     | NA    | NA    | 1,278 | 1.1   | 0.2  | 1.1    | 0.5   | 1.8   |
|                | FN-BMD (g/cm <sup>2</sup> ) | Lunar                                           | 0     | NA    | NA   | NA     | NA    | NA    | 1,243 | 0.8   | 0.1  | 0.8    | 0.4   | 1.3   |
| 31 OAS         | Age (yrs)                   | Questionnaire                                   | 600   | 68.1  | 4.2  | 68.0   | 60.0  | 76.0  | 0     | NA    | NA   | NA     | NA    | NA    |
|                | BMI (kg/m <sup>2</sup> )    | Measured                                        | 593   | 27.6  | 4.0  | 27.2   | 15.7  | 54.3  | 0     | NA    | NA   | NA     | NA    | NA    |
|                | Weight (kg)                 | Measured                                        | 593   | 83.7  | 12.5 | 82.5   | 48.0  | 137.9 | 0     | NA    | NA   | NA     | NA    | NA    |
|                | Height (cm)                 | Measured                                        | 593   | 174.3 | 6.7  | 174.3  | 128.4 | 191.8 | 0     | NA    | NA   | NA     | NA    | NA    |
|                | LS-BMD (g/cm <sup>2</sup> ) | Hologic                                         | 589   | 1.0   | 0.2  | 1.0    | 0.6   | 1.6   | 0     | NA    | NA   | NA     | NA    | NA    |
|                | FN-BMD (g/cm <sup>2</sup> ) | Hologic                                         | 584   | 0.8   | 0.1  | 0.8    | 0.5   | 1.2   | 0     | NA    | NA   | NA     | NA    | NA    |
| 32 OSTEOS      | Age (yrs)                   | Questionnaire                                   | 0     | NA    | NA   | NA     | NA    | NA    | 626   | 60.5  | 10.4 | 60.0   | 35.0  | 90.0  |
|                | BMI (kg/m <sup>2</sup> )    | Measured                                        | 0     | NA    | NA   | NA     | NA    | NA    | 627   | 27.4  | 5.0  | 26.3   | 17.4  | 46.7  |
|                | Weight (kg)                 | Measured                                        | 0     | NA    | NA   | NA     | NA    | NA    | 627   | 66.8  | 11.7 | 65.0   | 42.0  | 119.5 |
|                | Height (cm)                 | Measured                                        | 0     | NA    | NA   | NA     | NA    | NA    | 628   | 156.2 | 7.0  | 156.0  | 130.0 | 176.0 |

Supplementary Table 20B: Study-specific descriptive statistics

Stage 2: De-novo genotyping Replication BMD Loci and Fracture association

| Study               | Trait                    | Assessment method                 | Men   |       |      |        |       | Women |       |       |      |        |       |       |
|---------------------|--------------------------|-----------------------------------|-------|-------|------|--------|-------|-------|-------|-------|------|--------|-------|-------|
|                     |                          |                                   | N     | mean  | sd   | median | min   | max   | N     | mean  | sd   | median | min   | max   |
|                     | LS-BMD (g/cm2)           | Lunar                             | 0     | NA    | NA   | NA     | NA    | NA    | 599   | 1.0   | 0.2  | 1.0    | 0.4   | 1.6   |
|                     | FN-BMD (g/cm2)           | Lunar                             | 0     | NA    | NA   | NA     | NA    | NA    | 342   | 0.8   | 0.1  | 0.8    | 0.5   | 1.1   |
| <b>33 PERF</b>      | Age (yrs)                | Questionnaire                     | 0     | NA    | NA   | NA     | NA    | NA    | 3,927 | 64.1  | 7.9  | 64.9   | 45.2  | 80.8  |
|                     | BMI (kg/m <sup>2</sup> ) | Measured                          | 0     | NA    | NA   | NA     | NA    | NA    | 3,973 | 25.2  | 3.4  | 24.9   | 14.9  | 43.8  |
|                     | Weight (kg)              | Measured                          | 0     | NA    | NA   | NA     | NA    | NA    | 3,973 | 66.1  | 9.7  | 65.2   | 36.1  | 116.6 |
|                     | Height (cm)              | Measured                          | 0     | NA    | NA   | NA     | NA    | NA    | 3,973 | 161.8 | 6.0  | 162.0  | 134.3 | 190.0 |
|                     | LS-BMD (g/cm2)           | Lunar, Hologic                    | 0     | NA    | NA   | NA     | NA    | NA    | 3,927 | 0.9   | 0.2  | 0.9    | 0.4   | 1.5   |
|                     | FN-BMD (g/cm2)           | Lunar, Hologic                    | 0     | NA    | NA   | NA     | NA    | NA    | 3,915 | 0.7   | 0.1  | 0.7    | 0.3   | 1.1   |
| <b>34 SLOPREVAL</b> | Age (yrs)                | Questionnaire                     | 123   | 67.9  | 6.5  | 66.0   | 55.0  | 89.0  | 593   | 62.1  | 10.6 | 62.0   | 38.0  | 93.0  |
|                     | BMI (kg/m <sup>2</sup> ) | Measured                          | 123   | 27.7  | 3.9  | 27.4   | 19.6  | 43.4  | 593   | 26.9  | 4.5  | 26.0   | 18.9  | 44.9  |
|                     | Weight (kg)              | Measured                          | 123   | 81.6  | 12.6 | 80.0   | 55.0  | 130.0 | 593   | 69.1  | 12.2 | 67.0   | 45.0  | 115.0 |
|                     | Height (cm)              | Measured                          | 123   | 171.7 | 6.3  | 171.0  | 159.0 | 192.0 | 593   | 160.4 | 6.3  | 160.0  | 137.0 | 181.0 |
|                     | LS-BMD (g/cm2)           | Hologic                           | 123   | 1.0   | 0.2  | 1.0    | 0.7   | 1.5   | 588   | 0.9   | 0.2  | 0.8    | 0.4   | 1.5   |
|                     | FN-BMD (g/cm2)           | Hologic                           | 96    | 0.8   | 0.2  | 0.8    | 0.5   | 1.3   | 566   | 0.7   | 0.1  | 0.7    | 0.3   | 1.2   |
| <b>35 UFO-1</b>     | Age (yrs)                | Questionnaire                     | 1,011 | 54.2  | 7.7  | 59.7   | 29.5  | 71.5  | 3,306 | 58.6  | 7.6  | 59.9   | 29.6  | 76.9  |
|                     | BMI (kg/m <sup>2</sup> ) | Measured                          | 997   | 26.4  | 3.6  | 25.9   | 17.3  | 55.8  | 3,175 | 25.5  | 4.2  | 24.8   | 10.1  | 62.5  |
|                     | Weight (kg)              | Measured                          | 998   | 82.4  | 12.7 | 81.0   | 40.0  | 163.2 | 3,187 | 68.0  | 11.6 | 66.0   | 25.0  | 164.0 |
|                     | Height (cm)              | Measured                          | 997   | 176.6 | 6.3  | 176.0  | 152.0 | 197.0 | 3,200 | 163.4 | 5.9  | 163.0  | 122.0 | 191.0 |
|                     | LS-BMD (g/cm2)           | Lunar                             | 0     | NA    | NA   | NA     | NA    | NA    | 385   | 1.0   | 0.2  | 0.9    | 0.4   | 1.6   |
|                     | FN-BMD (g/cm2)           | Lunar                             | 0     | NA    | NA   | NA     | NA    | NA    | 415   | 0.8   | 0.1  | 0.8    | 0.5   | 1.2   |
| <b>UFO-2</b>        | Age (yrs)                | Questionnaire                     | 421   | 48.2  | 10.3 | 50.0   | 24.0  | 70.0  | 1,601 | 53.3  | 10.2 | 54.0   | 19.0  | 80.0  |
|                     | BMI (kg/m <sup>2</sup> ) | Measured                          | 421   | 25.9  | 3.2  | 25.5   | 18.7  | 41.6  | 1,601 | 25.3  | 4.3  | 24.6   | 14.3  | 46.6  |
|                     | Weight (kg)              | Measured                          | 421   | 82.1  | 11.4 | 81.0   | 51.0  | 129.0 | 1,601 | 68.1  | 12.1 | 66.0   | 36.0  | 127.0 |
|                     | Height (cm)              | Measured                          | 421   | 177.9 | 6.1  | 178.0  | 152.0 | 198.0 | 1,601 | 164.0 | 6.1  | 164.0  | 130.0 | 190.0 |
|                     | LS-BMD (g/cm2)           | Lunar                             | 0     | NA    | NA   | NA     | NA    | NA    | 0     | NA    | NA   | NA     | NA    | NA    |
|                     | FN-BMD (g/cm2)           | Lunar                             | 0     | NA    | NA   | NA     | NA    | NA    | 0     | NA    | NA   | NA     | NA    | NA    |
| <b>WHI GeCHIP -</b> |                          |                                   |       |       |      |        |       |       |       |       |      |        |       |       |
| <b>36 BMD</b>       | Age (yrs)                | Questionnaire                     | 0     | NA    | NA   | NA     | NA    | NA    | 3,929 | 64.5  | 7.1  | 65.0   | 50.0  | 79.0  |
|                     | BMI (kg/m <sup>2</sup> ) | measured                          | 0     | NA    | NA   | NA     | NA    | NA    | 3,908 | 27.7  | 6.0  | 26.5   | 14.3  | 67.9  |
|                     | Weight (kg)              | measured                          | 0     | NA    | NA   | NA     | NA    | NA    | 3,923 | 72.4  | 16.5 | 69.4   | 36.0  | 176.5 |
|                     | Height (cm)              | measured                          | 0     | NA    | NA   | NA     | NA    | NA    | 3,910 | 1.6   | 0.1  | 1.6    | 1.0   | 1.9   |
|                     | LS-BMD (g/cm2)           | Hologic QDR 2000, 2000+, or 4500W | 0     | NA    | NA   | NA     | NA    | NA    | 3,761 | 1.0   | 0.2  | 1.0    | 0.5   | 1.8   |
|                     | FN-BMD (g/cm2)           | Hologic QDR 2000, 2000+           | 0     | NA    | NA   | NA     | NA    | NA    | 3,929 | 0.7   | 0.1  | 0.7    | 0.4   | 1.3   |



## Supplementary 20C: Study descriptives fracture

### Stage 2: De-novo genotyping Replication BMD Loci and Fracture association

| Study                   | Trait                   | Assessment method                              | Men        |                | Women      |                |
|-------------------------|-------------------------|------------------------------------------------|------------|----------------|------------|----------------|
|                         |                         |                                                | Fracture N | Non-fracture N | Fracture N | Non-fracture N |
| <b>1 AOGC-GOS</b>       | All fractures           | Questionnaire, radiography                     | 335        | 670            | 239        | 1,093          |
|                         | Non-vertebral fractures | Questionnaire, radiography                     | 74         | 670            | 167        | 1,093          |
|                         | Vertebral fractures     | NA                                             | NA         | NA             | NA         | NA             |
| <b>2 AOGC-SHEFFIELD</b> | All fractures           | Questionnaire, radiography lateral morphometry | NA         | NA             | 1,373      | 2,013          |
|                         | Non-vertebral fractures | Questionnaire, radiography                     | NA         | NA             | 955        | 2,027          |
|                         | Vertebral fractures     | Radiography lateral morphometry                | NA         | NA             | 565        | 3,411          |
| <b>3 APOSS</b>          | All fractures           | Self-reported                                  | NA         | NA             | 560        | 2,275          |
|                         | Non-vertebral fractures | NA                                             | NA         | NA             | NA         | NA             |
|                         | Vertebral fractures     | NA                                             | NA         | NA             | NA         | NA             |
| <b>4 AROS</b>           | All fractures           | Radiographic                                   | 64         | 38             | 271        | 92             |
|                         | Non-vertebral fractures | NA                                             | NA         | NA             | NA         | NA             |
|                         | Vertebral fractures     | Radiographic                                   | 64         | 38             | 271        | 92             |
| <b>5 AUSTRIOS-A</b>     | All fractures           | Medical records, radiographic                  | 118        | 125            | 116        | 378            |
|                         | Non-vertebral fractures | Medical records, radiographic                  | 118        | 123            | 105        | 389            |
|                         | Vertebral fractures     | NA                                             | NA         | NA             | NA         | NA             |
| <b>6 AUSTRIOS-B</b>     | All fractures           | Medical records, radiographic                  | 144        | 183            | 816        | 921            |
|                         | Non-vertebral fractures | Medical records, radiographic                  | 32         | 295            | 273        | 1,464          |
|                         | Vertebral fractures     | Radiographic                                   | 128        | 199            | 675        | 1,062          |
| <b>7 BARCOS</b>         | All fractures           | Medical records, radiographic documentation    | NA         | NA             | 179        | 1,258          |
|                         | Non-vertebral fractures | NA                                             | NA         | NA             | NA         | NA             |
|                         | Vertebral fractures     | NA                                             | NA         | NA             | NA         | NA             |
| <b>8 CABRIO-C</b>       | All fractures           | Patient-referred, medical records              | 131        | 412            | 210        | 697            |
|                         | Non-vertebral fractures | NA                                             | NA         | NA             | NA         | NA             |
|                         | Vertebral fractures     | Radiographic documentation                     | 68         | 438            | 127        | 747            |
| <b>9 CABRIO-CC</b>      | All fractures           | Patient-referred, medical records              | 176        | 364            | 946        | 829            |
|                         | Non-vertebral fractures | Patient-referred, medical records              | 133        | 378            | 658        | 925            |
|                         | Vertebral fractures     | Radiographic documentation                     | 25         | 30             | 195        | 324            |
| <b>10 CAIFOS</b>        | All fractures           | Self-reported                                  | NA         | NA             | 749        | 598            |
|                         | Non-vertebral fractures | Self-reported                                  | NA         | NA             | 179        | 1,168          |
|                         | Vertebral fractures     | Radiographic                                   | NA         | NA             | 428        | 600            |

## Supplementary 20C: Study descriptives fracture

### Stage 2: De-novo genotyping Replication BMD Loci and Fracture association

| Study        | Trait                   | Assessment method                                                        | Men        |                | Women      |                |
|--------------|-------------------------|--------------------------------------------------------------------------|------------|----------------|------------|----------------|
|              |                         |                                                                          | Fracture N | Non-fracture N | Fracture N | Non-fracture N |
| 11 CALEX     | All fractures           | Questionnaire, medical records, radiographic documentation               | 41         | 110            | 72         | 301            |
|              | Non-vertebral fractures | NA                                                                       | NA         | NA             | NA         |                |
|              | Vertebral fractures     | NA                                                                       | NA         | NA             | NA         |                |
| 12 CAMOS     | All fractures           | Medical records, radiographic documentation                              | 98         | 559            | 312        | 1,226          |
|              | Non-vertebral fractures | NA                                                                       | NA         | NA             | NA         |                |
|              | Vertebral fractures     | NA                                                                       | NA         | NA             | NA         |                |
| 13 DECODErep | All fractures           | NA                                                                       | NA         | NA             | NA         |                |
|              | Non-vertebral fractures | NA                                                                       | NA         | NA             | NA         |                |
|              | Vertebral fractures     | NA                                                                       | NA         | NA             | NA         |                |
| 14 DOES      | All fractures           | X-ray reports                                                            | 141        | 373            | 405        | 462            |
|              | Non-vertebral fractures | NA                                                                       | NA         | NA             | NA         |                |
|              | Vertebral fractures     | NA                                                                       | NA         | NA             | NA         |                |
| 15 DOPS      | All fractures           | Radiographic                                                             | NA         | NA             | 425        | 1,291          |
|              | Non-vertebral fractures | Radiographic                                                             | NA         | NA             | 239        | 1,477          |
|              | Vertebral fractures     | Radiographic                                                             | NA         | NA             | 108        | 1,605          |
| 16 EDOS      | All fractures           | Medical records, radiographic documentation                              | 286        | 38             | 1,270      | 159            |
|              | Non-vertebral fractures | NA                                                                       | NA         | NA             | NA         |                |
|              | Vertebral fractures     | NA                                                                       | NA         | NA             | NA         |                |
| 17 EPICNOR   | All fractures           | Medical records                                                          | 78         | 602            | 157        | 562            |
|              | Non-vertebral fractures | Medical records                                                          | 77         | 603            | 150        | 569            |
|              | Vertebral fractures     | NA                                                                       | NA         | NA             | NA         |                |
| 18 EPOLOS    | All fractures           | Self -reports (fractures data from questionnaire filled in by physician) | 109        | 208            | 139        | 259            |
|              | Non-vertebral fractures | Self -reports (fractures data from questionnaire filled in by physician) | 109        | 208            | 139        | 259            |
|              | Vertebral fractures     | NA                                                                       | NA         | NA             | NA         |                |
| 19 EPOS      | All fractures           | Self-report, questionnaire, medical records, radiographic documentation  | 214        | 505            | 517        | 856            |

## Supplementary 20C: Study descriptives fracture

### Stage 2: De-novo genotyping Replication BMD Loci and Fracture association

| Study            | Trait                   | Assessment method                                                       | Men        |                | Women      |                |
|------------------|-------------------------|-------------------------------------------------------------------------|------------|----------------|------------|----------------|
|                  |                         |                                                                         | Fracture N | Non-fracture N | Fracture N | Non-fracture N |
|                  | Non-vertebral fractures | Self-report, questionnaire, medical records, radiographic documentation | 124        | 595            | 403        | 970            |
|                  | Vertebral fractures     | Radiographic documentation                                              | 112        | 607            | 201        | 1,172          |
| <b>20 FLOS</b>   | All fractures           | Medical records, radiographic documentation                             | 83         | 78             | 118        | 721            |
|                  | Non-vertebral fractures | Medical records, radiographic documentation                             | 83         | 78             | 72         | 767            |
|                  | Vertebral fractures     | Radiographic documentation                                              | 5          | 156            | 68         | 771            |
| <b>21 GEOS</b>   | All fractures           | Self-report                                                             | NA         | NA             | 110        | 1,799          |
|                  | Non-vertebral fractures | NA                                                                      | NA         | NA             | NA         | NA             |
|                  | Vertebral fractures     | NA                                                                      | NA         | NA             | NA         | NA             |
| <b>22 GEVUR</b>  | All fractures           | Medical records, radiographic documentation                             | 61         | 99             | 346        | 493            |
|                  | Non-vertebral fractures | Medical records, radiographic documentation                             | 52         | 108            | 324        | 515            |
|                  | Vertebral fractures     | NA                                                                      | NA         | NA             | NA         | NA             |
| <b>23 GROS</b>   | All fractures           | Medical records, radiographic documentation                             | 54         | 26             | 340        | 125            |
|                  | Non-vertebral fractures | Medical records, radiographic documentation                             | 49         | 31             | 313        | 154            |
|                  | Vertebral fractures     | Radiographic documentation                                              | 5          | 75             | 28         | 435            |
| <b>24 HCS</b>    | All fractures           | Self-report                                                             | 103        | 1,399          | 253        | 1,036          |
|                  | Non-vertebral fractures | NA                                                                      | NA         | NA             | NA         | NA             |
|                  | Vertebral fractures     | NA                                                                      | NA         | NA             | NA         | NA             |
| <b>25 HK</b>     | All fractures           | Medical records, radiographic documentation                             | 316        | 1,572          | 478        | 1,506          |
|                  | Non-vertebral fractures | NA                                                                      | NA         | NA             | NA         | NA             |
|                  | Vertebral fractures     | NA                                                                      | NA         | NA             | NA         | NA             |
| <b>26 KorAMC</b> | All fractures           | Self-report and radiographic                                            | NA         | NA             | 171        | 1,226          |
|                  | Non-vertebral fractures | Self-report and radiographic                                            | NA         | NA             | 101        | 1,193          |
|                  | Vertebral fractures     | NA                                                                      | NA         | NA             | NA         | NA             |
| <b>27 LASA</b>   | All fractures           | Self-report, GP questionnaire                                           | 150        | 314            | 176        | 309            |
|                  | Non-vertebral fractures | NA                                                                      | NA         | NA             | NA         | NA             |
|                  | Vertebral fractures     | Radiographic documentation (Genant)                                     | 117        | 137            | 121        | 132            |

## Supplementary 20C: Study descriptives fracture

### Stage 2: De-novo genotyping Replication BMD Loci and Fracture association

| Study                 | Trait                   | Assessment method                                         | Men        |                | Women      |                |
|-----------------------|-------------------------|-----------------------------------------------------------|------------|----------------|------------|----------------|
|                       |                         |                                                           | Fracture N | Non-fracture N | Fracture N | Non-fracture N |
| <b>28 MANMC</b>       | All fractures           | Medical records, Surgical Report, ICD-9 Codes             | NA         | NA             | 848        | 0              |
|                       | Non-vertebral fractures | NA                                                        | NA         | NA             | NA         |                |
|                       | Vertebral fractures     | NA                                                        | NA         | NA             | NA         |                |
| <b>29 MrOS Sweden</b> | All fractures           | Questionnaire, radiographic documentation                 | 1255       | 1,651          | NA         | NA             |
|                       | Non-vertebral fractures | Radiographic documentation                                | 157        | 2,765          | NA         | NA             |
|                       | Vertebral fractures     | Radiographic documentation                                | 309        | 2,613          | NA         | NA             |
| <b>30 NOSOS</b>       | All fractures           | Self-report                                               | NA         | NA             | 385        | 843            |
|                       | Non-vertebral fractures | NA                                                        | NA         | NA             | NA         |                |
|                       | Vertebral fractures     | NA                                                        | NA         | NA             | NA         |                |
| <b>31 OAS</b>         | All fractures           | Incident clinical fractures+ baseline vertebral fractures | 97         | 503            | NA         | NA             |
|                       | Non-vertebral fractures | Incident clinical fractures                               | 24         | 576            | NA         | NA             |
|                       | Vertebral fractures     | Radiographic documentation                                | 77         | 523            | NA         | NA             |
| <b>32 OSTEOS</b>      | All fractures           | NA                                                        | NA         | NA             | NA         |                |
|                       | Non-vertebral fractures | NA                                                        | NA         | NA             | NA         |                |
|                       | Vertebral fractures     | NA                                                        | NA         | NA             | NA         |                |
| <b>33 PERF</b>        | All fractures           | Medical records, radiographic documentation               | NA         | NA             | 1,051      | 2,405          |
|                       | Non-vertebral fractures | NA                                                        | NA         | NA             | NA         |                |
|                       | Vertebral fractures     | NA                                                        | NA         | NA             | NA         |                |
| <b>34 SLOPREVAL</b>   | All fractures           | Medical records                                           | 14         | 56             | 77         | 116            |
|                       | Non-vertebral fractures | NA                                                        | NA         | NA             | NA         |                |
|                       | Vertebral fractures     | NA                                                        | NA         | NA             | NA         |                |
| <b>35 UFO-1</b>       | All fractures           | Medical records, radiographic documentation               | 493        | 518            | 1,691      | 1,615          |
|                       | Non-vertebral fractures | Medical records, radiographic documentation               | 493        | 518            | 1,691      | 1,615          |
|                       | Vertebral fractures     | NA                                                        | NA         | NA             | NA         |                |
| <b>UFO-2</b>          | All fractures           | Medical records, radiographic documentation               | 10         | 411            | 181        | 1,420          |
|                       | Non-vertebral fractures | NA                                                        | NA         | NA             | NA         |                |
|                       | Vertebral fractures     | NA                                                        | NA         | NA             | NA         |                |

## Supplementary 20C: Study descriptives fracture

### Stage 2: De-novo genotyping Replication BMD Loci and Fracture association

| Study                  | Trait                   | Assessment method | Men        |                | Women      |                |
|------------------------|-------------------------|-------------------|------------|----------------|------------|----------------|
|                        |                         |                   | Fracture N | Non-fracture N | Fracture N | Non-fracture N |
| 36 WHI GeCHIP -<br>BMD | All fractures           | NA                | NA         | NA             | NA         | NA             |
|                        | Non-vertebral fractures | NA                | NA         | NA             | NA         | NA             |
|                        | Vertebral fractures     | NA                | NA         | NA             | NA         | NA             |

## Supplementary Table 20D: De-novo Genotyping QC

### Stage 2: De-novo genotyping Replication BMD Loci and Fracture association

|    | Cohort         | Genotyping        |                |                  |                             |      |               |                    | SNPs that met QC criteria |
|----|----------------|-------------------|----------------|------------------|-----------------------------|------|---------------|--------------------|---------------------------|
|    |                | Genotyping Center | Genotyped SNPs | Sample Call rate | Samples meeting QC criteria | MAF  | SNP Call rate | P for HWE          |                           |
| 1  | AOGC-GOS       | AOGC              | 74             | 80%              | 2635                        | > 1% | >90%          | > 10 <sup>-6</sup> | 72                        |
| 2  | AOGC-SHEFFIELD | AOGC              | 74             | 80%              | 3817                        | > 1% | >90%          | > 10 <sup>-6</sup> | 71                        |
| 3  | APOSS          | KBIO              | 82             | 80%              | 3066                        | > 1% | >90%          | > 10 <sup>-6</sup> | 82                        |
| 4  | AROS           | KBIO              | 96             | 80%              | 789                         | > 1% | >90%          | > 10 <sup>-6</sup> | 96                        |
| 5  | AUSTRIOS-A     | KBIO              | 82             | 80%              | 638                         | > 1% | >90%          | > 10 <sup>-6</sup> | 49                        |
| 6  | AUSTRIOS-B     | KBIO              | 82             | 80%              | 834                         | > 1% | >90%          | > 10 <sup>-6</sup> | 49                        |
| 7  | BARCOS         | KBIO              | 96             | 80%              | 1422                        | > 1% | >90%          | > 10 <sup>-6</sup> | 96                        |
| 8  | CABRIO-C       | KBIO              | 96             | 80%              | 1361                        | ≥ 1% | >90%          | > 10 <sup>-6</sup> | 96                        |
| 9  | CABRIO-CC      | KBIO              | 82             | 80%              | 2178                        | > 1% | >90%          | > 10 <sup>-6</sup> | 82                        |
| 10 | CAIFOS         | KBIO              | 96             | 80%              | 1321                        | > 1% | >90%          | > 10 <sup>-6</sup> | 96                        |
| 11 | CALEX          | KBIO              | 82             | 80%              | 645                         | > 1% | >90%          | > 10 <sup>-6</sup> | 82                        |
| 12 | CAMOS          | KBIO              | 96             | 80%              | 2342                        | > 1% | >90%          | > 10 <sup>-6</sup> | 96                        |
| 13 | DECODErep      | DECODE            | 95             | 80%              | 2620                        | > 1% | >90%          | > 10 <sup>-6</sup> | 95                        |
| 14 | DOES           | DECODE            | 95             | 80%              | 1347                        | > 1% | >90%          | > 10 <sup>-6</sup> | 90                        |
| 15 | DOPS           | KBIO              | 96             | 80%              | 1670                        | > 1% | >90%          | > 10 <sup>-6</sup> | 96                        |
| 16 | EDOS           | KBIO              | 96             | 80%              | 1996                        | > 1% | >90%          | > 10 <sup>-6</sup> | 96                        |
| 17 | EPICNOR        | KBIO              | 82             | 80%              | 1377                        | ≥ 1% | >90%          | > 10 <sup>-6</sup> | 82                        |
| 18 | EPOLOS         | KBIO              | 82             | 80%              | 688                         | > 1% | >90%          | > 10 <sup>-6</sup> | 81                        |
| 19 | EPOS           | KBIO              | 82             | 80%              | 2003                        | ≥ 1% | >90%          | > 10 <sup>-6</sup> | 82                        |
| 20 | FLOS           | KBIO              | 96             | 80%              | 726                         | > 1% | >90%          | > 10 <sup>-6</sup> | 96                        |
| 21 | GEOS           | KBIO              | 82             | 80%              | 2232                        | > 1% | >90%          | > 10 <sup>-6</sup> | 87                        |

## Supplementary Table 20D: De-novo Genotyping QC

### Stage 2: De-novo genotyping Replication BMD Loci and Fracture association

|    | Cohort           | Genotyping        |                |                  |                             |        |               |                    | SNPs that met QC criteria |
|----|------------------|-------------------|----------------|------------------|-----------------------------|--------|---------------|--------------------|---------------------------|
|    |                  | Genotyping Center | Genotyped SNPs | Sample Call rate | Samples meeting QC criteria | MAF    | SNP Call rate | P for HWE          |                           |
| 22 | GEVUR            | KBIO              | 96             | 80%              | 756                         | > 1%   | >90%          | > 10 <sup>-6</sup> | 96                        |
| 23 | GROS             | KBIO              | 96             | 80%              | 459                         | > 1%   | >90%          | > 10 <sup>-6</sup> | 96                        |
| 24 | HCS              | KBIO              | 82             | 80%              | 2824                        | > 1%   | >90%          | > 10 <sup>-6</sup> | 82                        |
| 25 | HK               | DECODE            | 95             | 80%              | 3772                        | > 1%   | >90%          | > 10 <sup>-6</sup> | 94                        |
| 26 | KorAMC           | DECODE            | 95             | 80%              | 1390                        | > 1%   | >90%          | > 10 <sup>-6</sup> | 95                        |
| 27 | LASA             | KBIO              | 82             | 80%              | 891                         | > 1%   | >90%          | > 10 <sup>-6</sup> | 82                        |
| 28 | MANMC            | KBIO              | 82             | 80%              | 1007                        | > 1%   | >90%          | > 10 <sup>-6</sup> | 82                        |
| 29 | MrOS Sweden      | KBIO              | 96             | 80%              | 2477                        | > 1%   | >90%          | > 10 <sup>-6</sup> | 87                        |
| 30 | NOSOS            | KBIO              | 82             | 80%              | 1191                        | > 1%   | >90%          | > 10 <sup>-6</sup> | 82                        |
| 31 | OAS              | KBIO              | 96             | 80%              | 581                         | > 1%   | >90%          | > 10 <sup>-6</sup> | 96                        |
| 32 | OSTEOS           | KBIO              | 0              | Failed           | Failed                      | Failed | Failed        | Failed             | Failed                    |
| 33 | PERF             | DECODE            | 95             | 80%              | 3346                        | > 1%   | >90%          | > 10 <sup>-6</sup> | 95                        |
| 34 | SLO-PREVAL       | KBIO              | 96             | 80%              | 677                         | > 1%   | >90%          | > 10 <sup>-6</sup> | 93                        |
| 35 | UFO              | KBIO              | 82             | 80%              | 5921                        | > 1%   | >90%          | > 10 <sup>-6</sup> | 82                        |
| 36 | WHI GeCHIP - BMD | WHI               | 67             | 98%              | 3923                        | >0.5%  | >98%          | > 10 <sup>-6</sup> | 67                        |

## Supplementary Figures

**Supplementary Figure 1.** Quantile-quantile (Q-Q) plots. A) femoral neck BMD. B) lumbar spine BMD. The plots compare additive model statistics to those expected under the null distribution using fixed-effects for all analyzed HapMap CEU imputed SNPs passing quality control criteria in the studies (red dots) and after adjustment for 82 SNPs selected for replication (black dots).

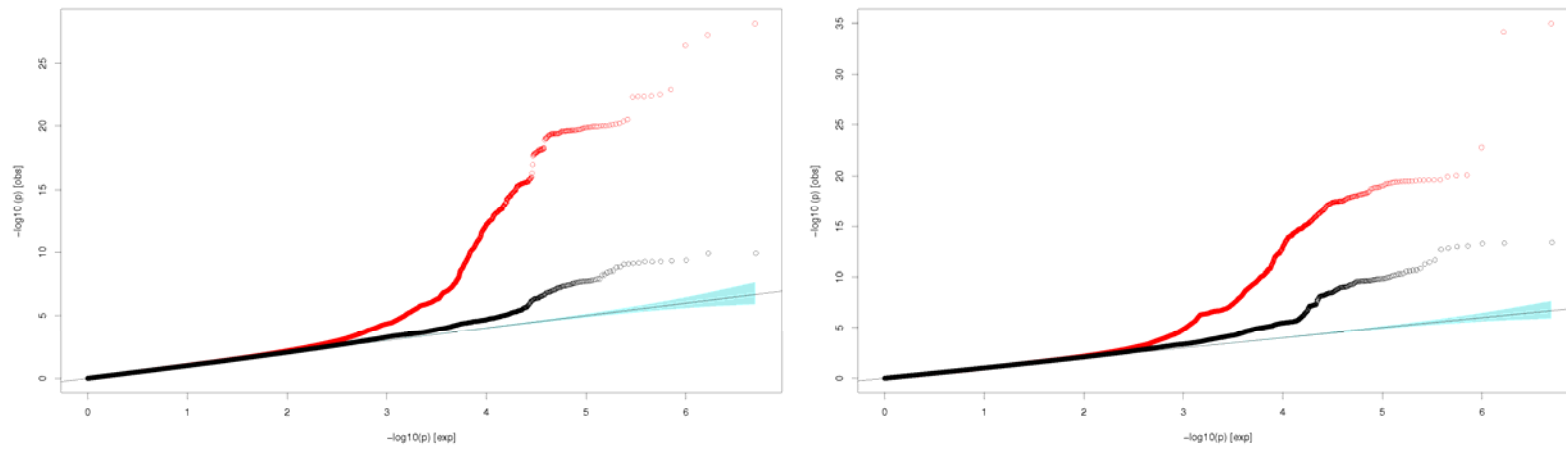



**Supplementary Figure 2.** Manhattan plots. Plots display loci associated at genome-wide significant level with femoral neck BMD (a) and lumbar spine BMD and (b) for all SNPs analyzed using fixed-effects.

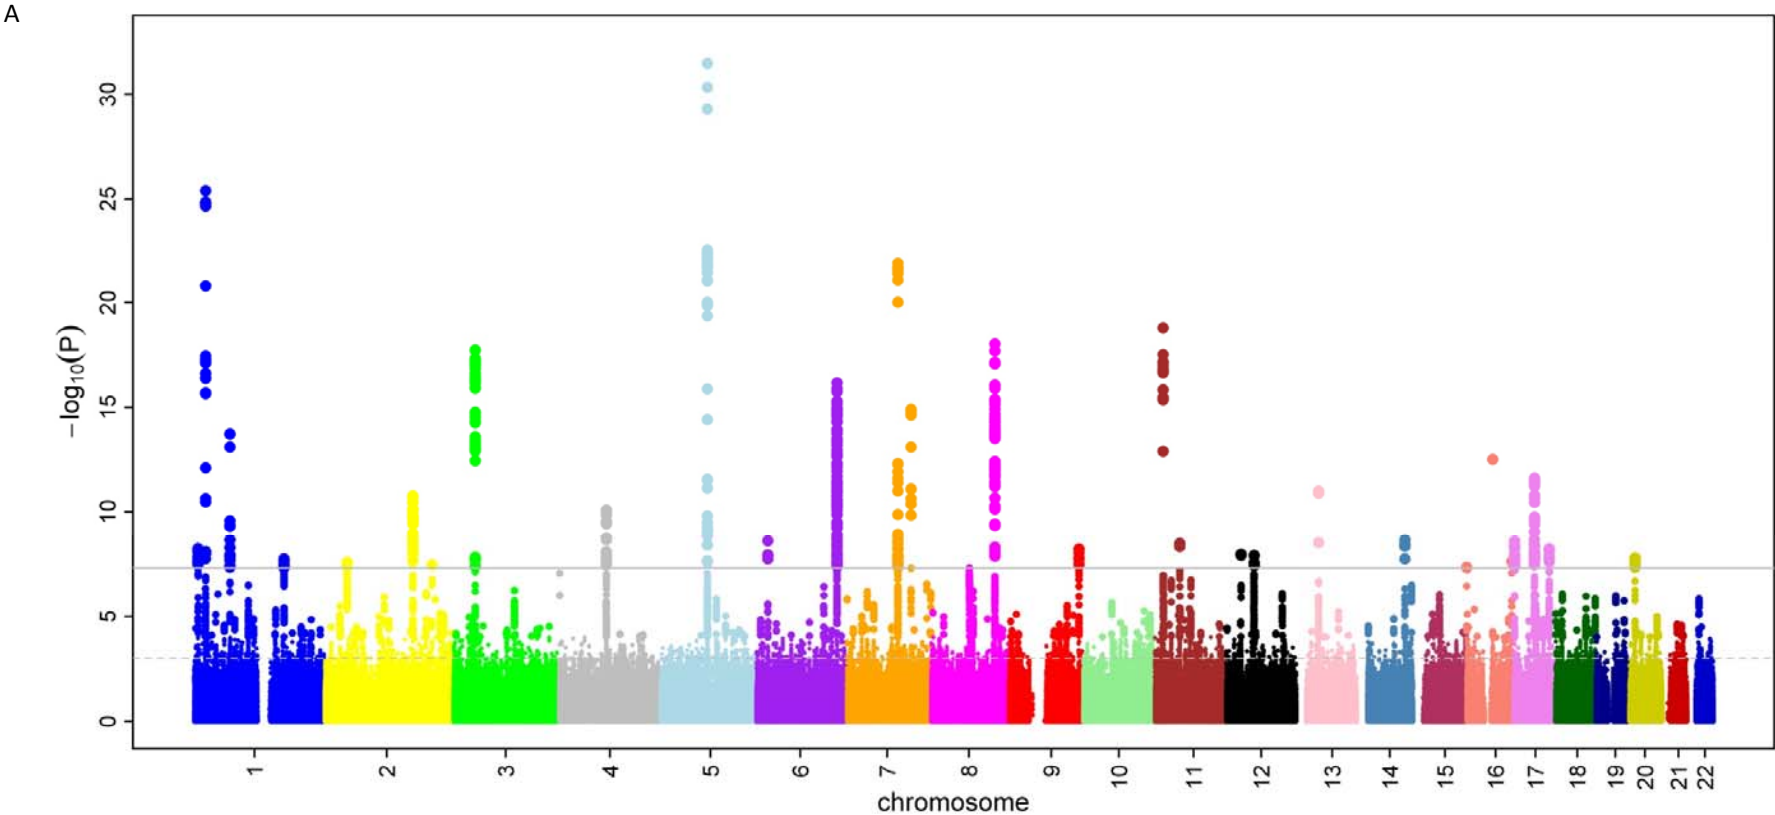

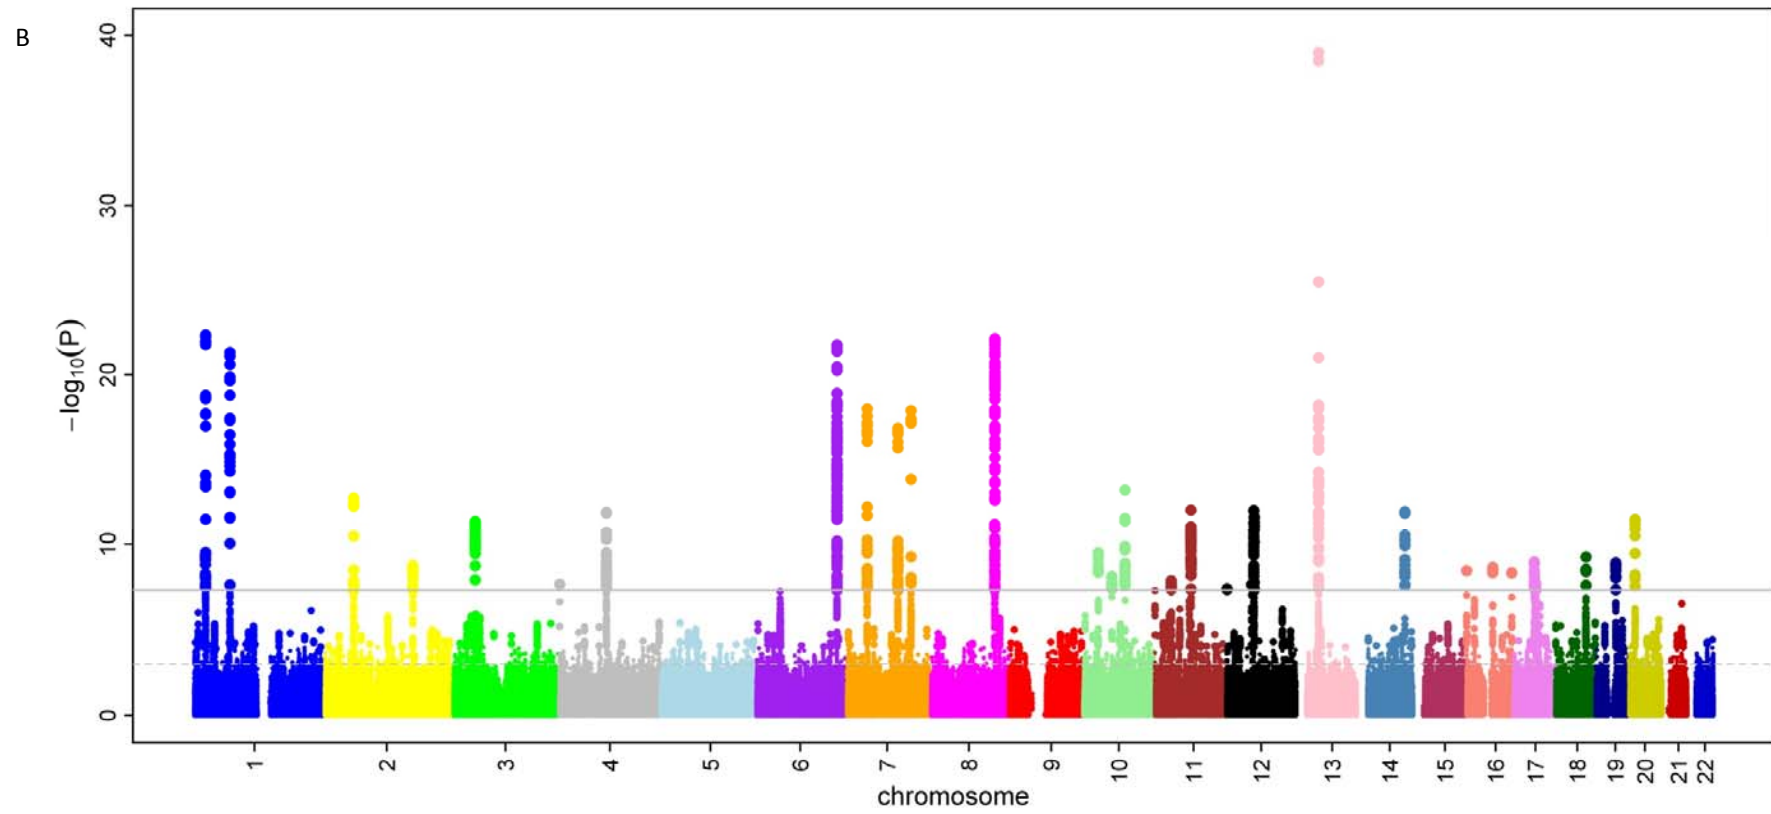

**Supplementary Figure 3.** Regional plots. Regional association plot for each of the 32 novel (A. 1q24.3, B. 2p21, C. 2q13, D. 2q14.2, E. 3q13.2, F. 3q25.31, G. 4p16.3, H. 6p21.1, I. 6p22.3, J. 7q31.31, K. 7q36.1, L. 8q13.3, M. 9q34.11, N. 10p11.23, O. 10q21.1, P. 10q22.3\_1, Q. 10q24.2, R. 11p14.1\_1, S. 12p11.22, T. 12p13.33, U. 12q13.12, V. 12q23.3, W. 14q32.12, X. 16p13.11, Y. 16p13.3\_1, Z. 16p13.3\_2, AA. 16q12.1, AB. 17p13.3, AC. 17q24.3, AD. 18p11.21, AE. 19q13.11, AF. Xp22.31) and 24 previously reported loci (BA. 1p31.3, BB. 1p36.12, BC. 2p16.2, BD. 2q24.3, BE. 3p22.1, BF. 4q22.1, BG. 5q14.3, BH. 6q22.32, BI. 6q25.1, BJ. 7p14.1, BK. 7q21.3, BL. 8q24.12, BM. 11p11.2, BN. 11p14.1\_2, BO. 11p15.2, BP. 11q13.2, BQ. 12q13.13, BR. 13q14.11, BS. 14q32.32, BT. 16q24.1, BU. 17q21.31\_1, BV. 17q21.31\_2, BW. 18q21.33, BX. 20p12. 2). SNPs are plotted by position in a 1Mb window against association with BMD ( $-\log_{10} P$ ). Plot highlighting the most significant SNP in the stage 1 BMD meta-analysis. Blue peaks indicate recombination rates. The SNPs surrounding the most significant SNP are color coded to reflect their LD with this SNP (from pairwise  $r^2$  values from the HapMap CEU). Genes, exons and the direction of transcription from the UCSC genome browser are noted.

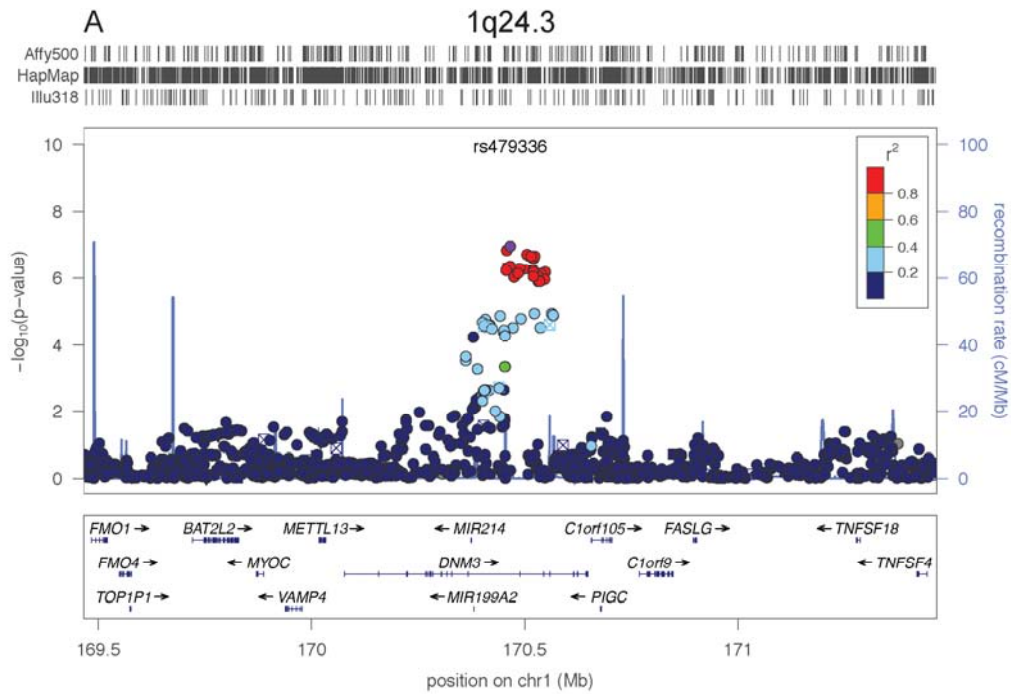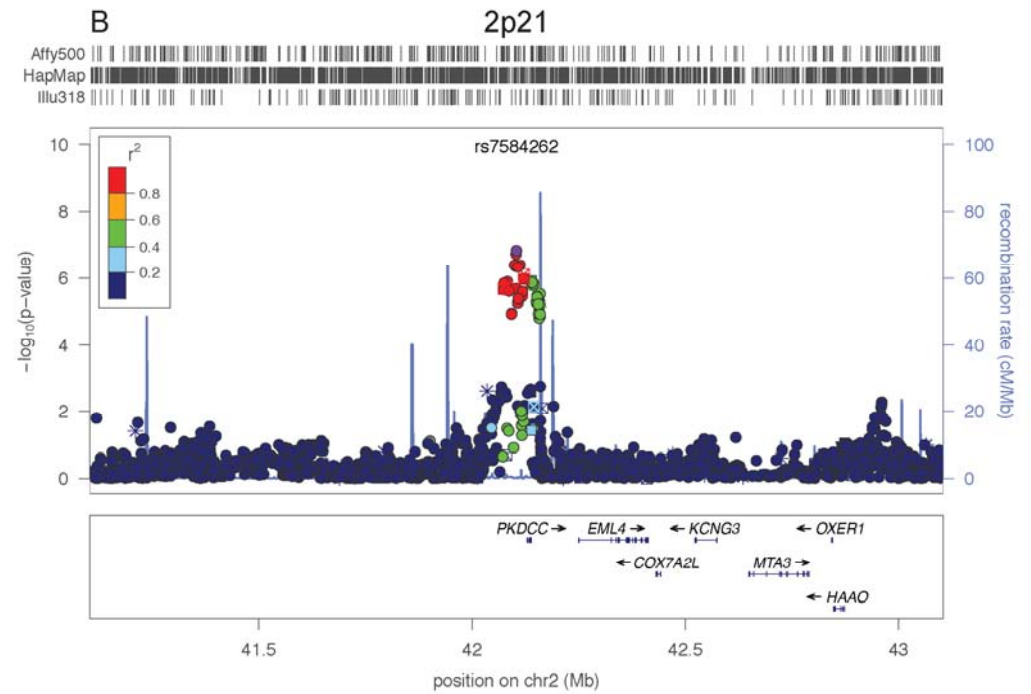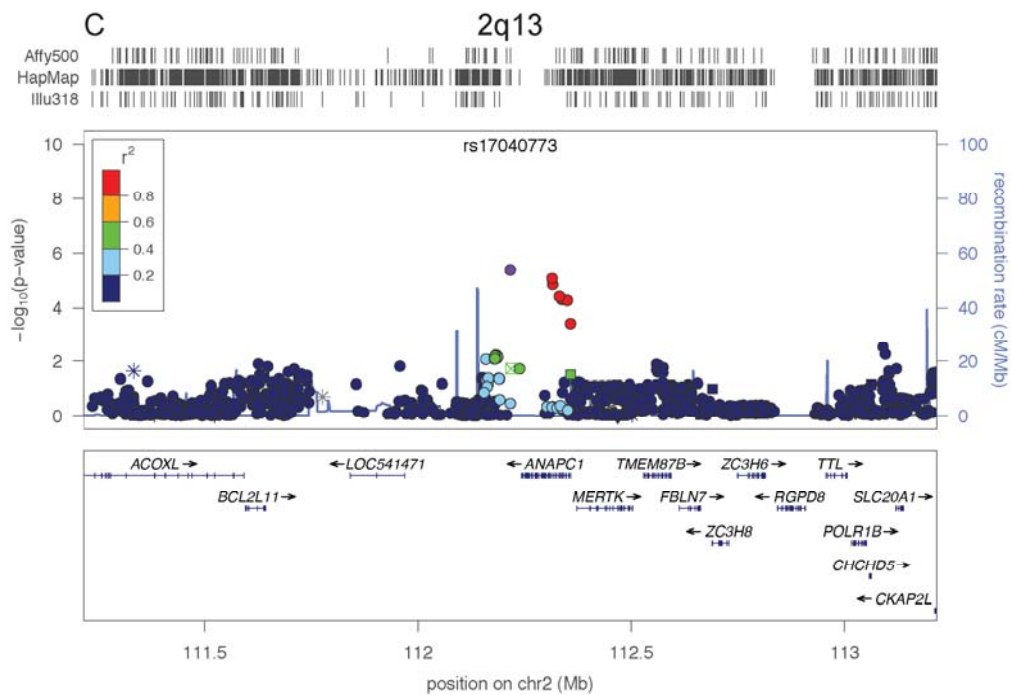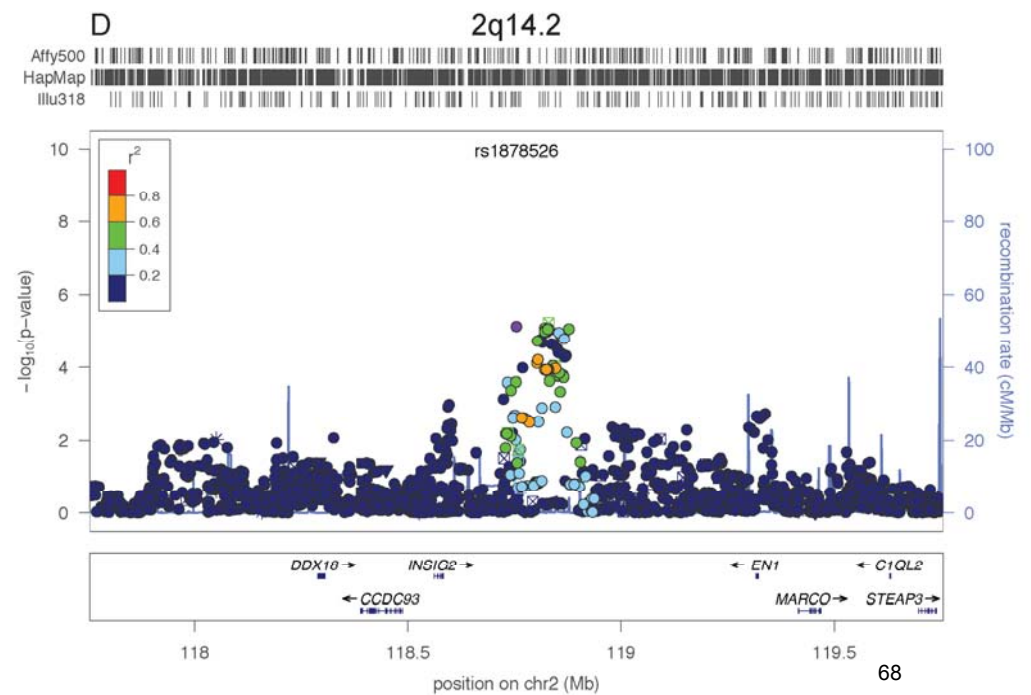

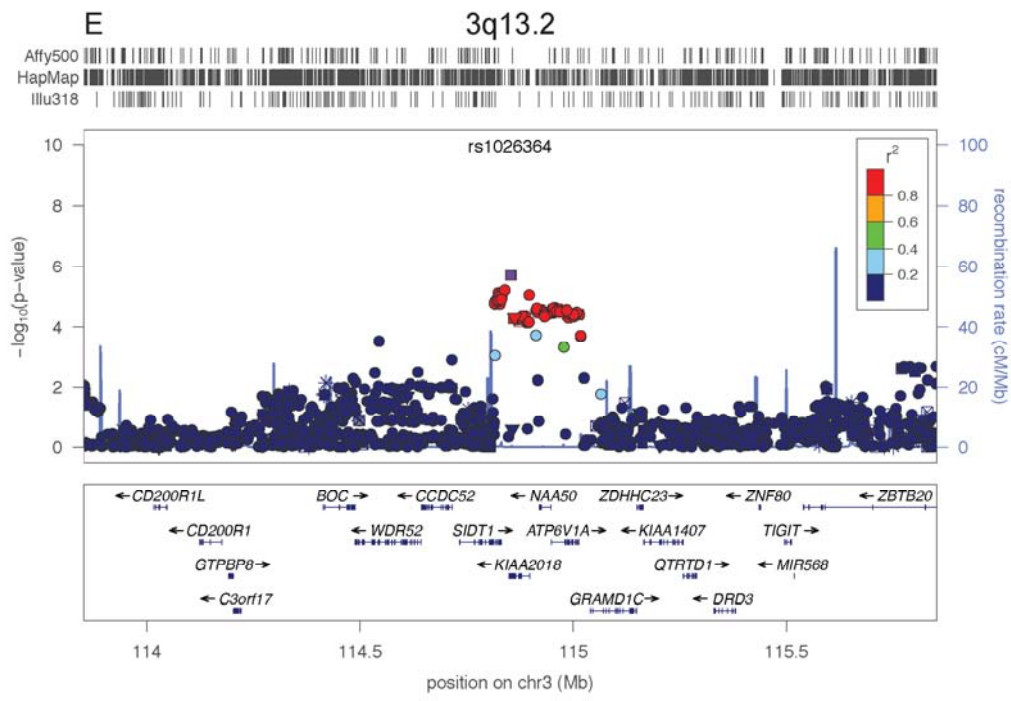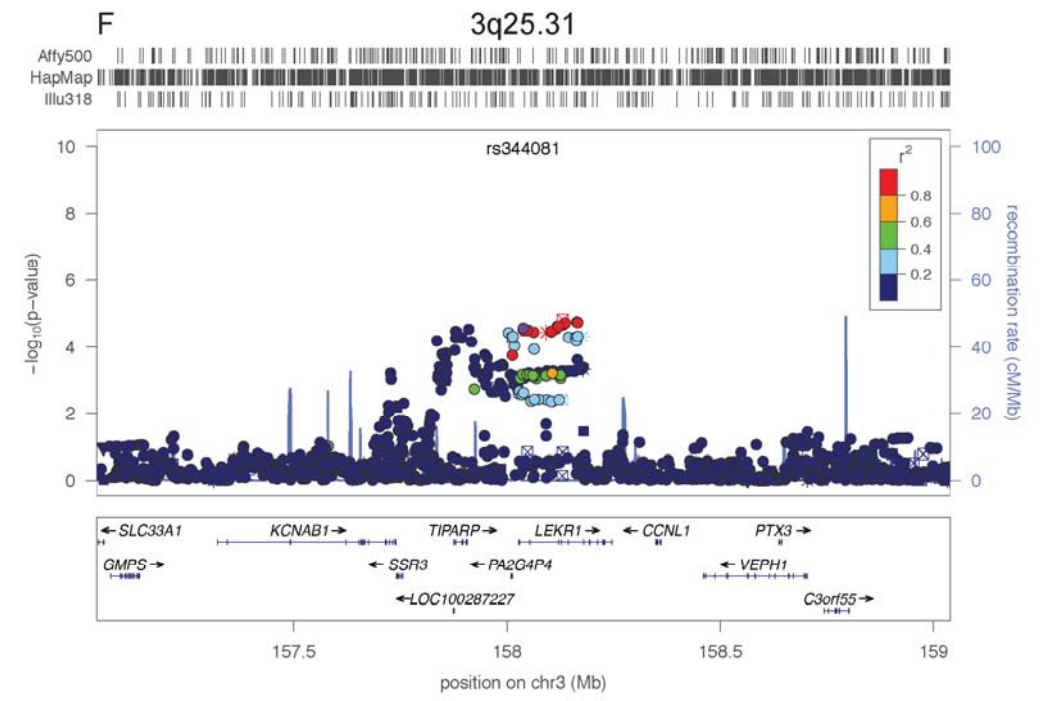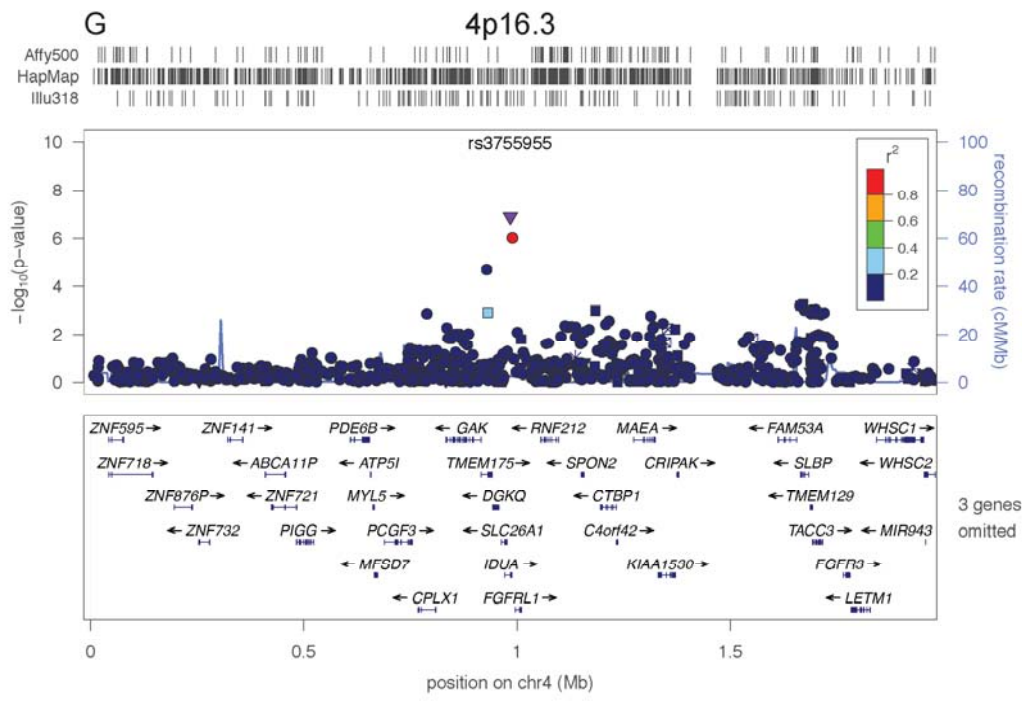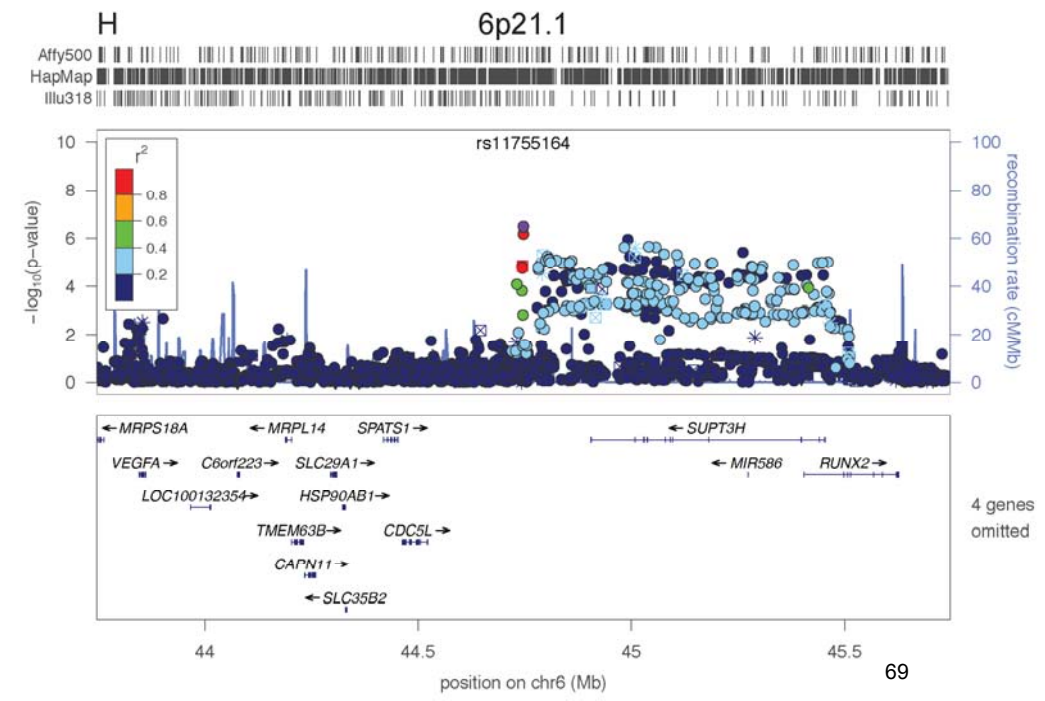

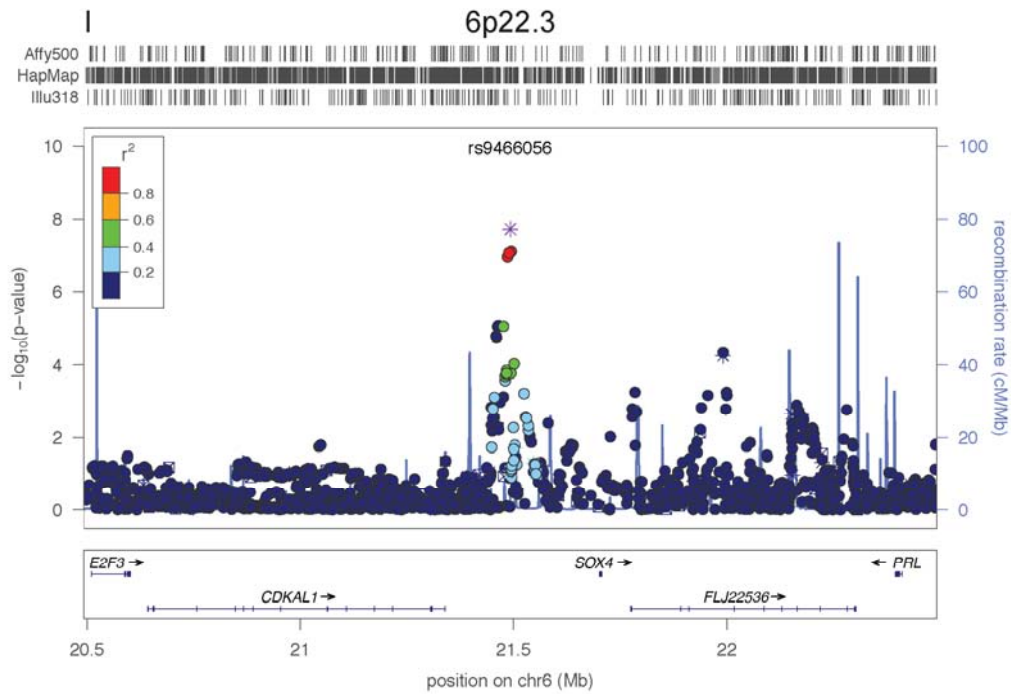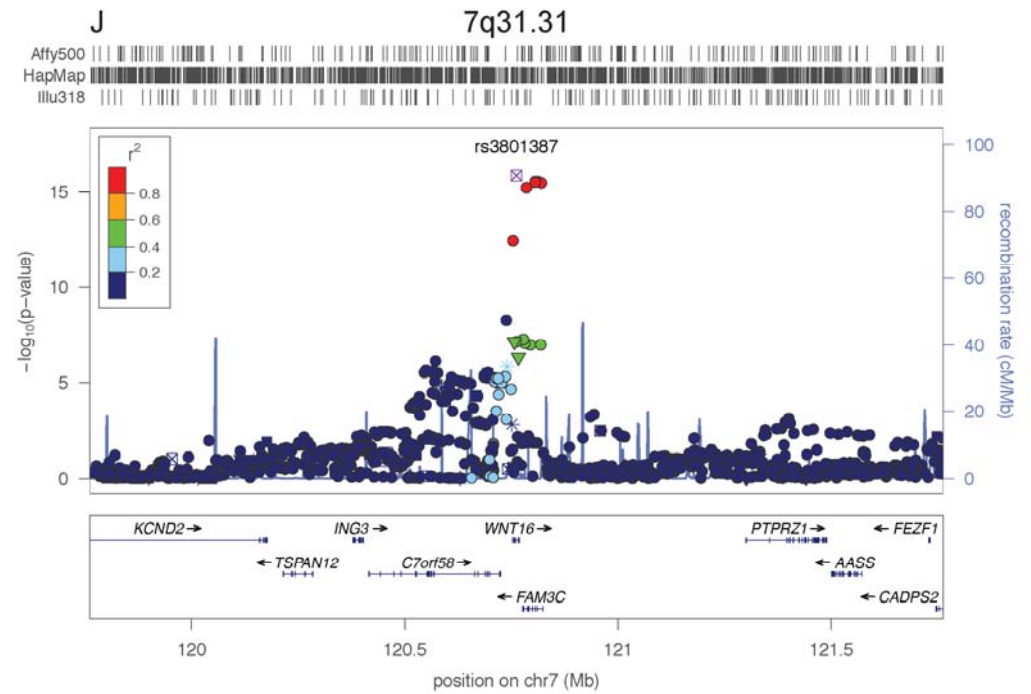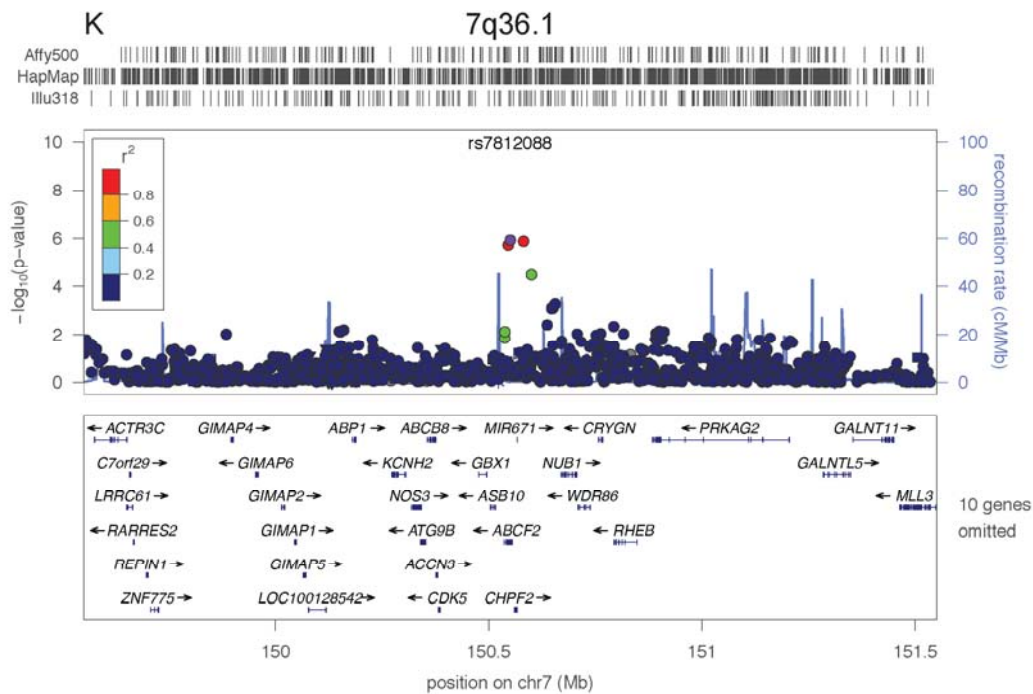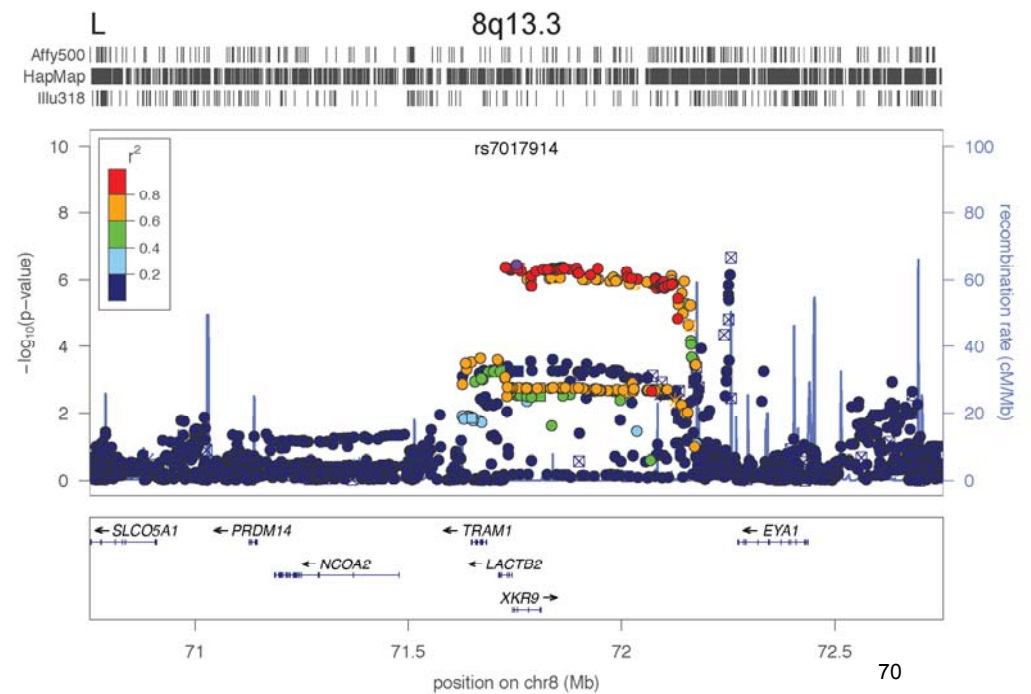

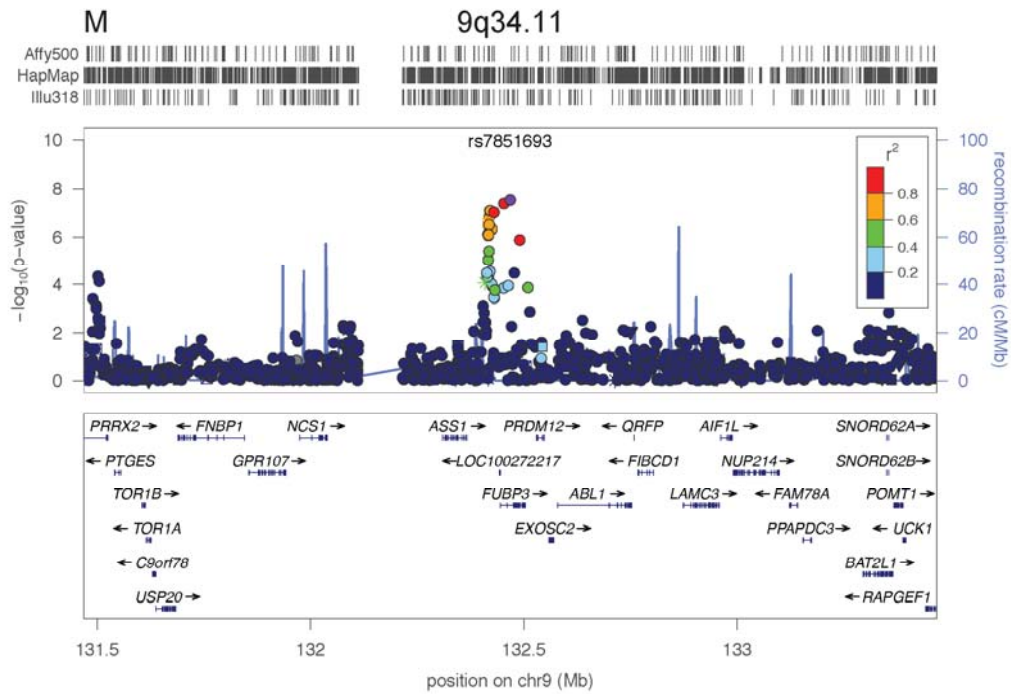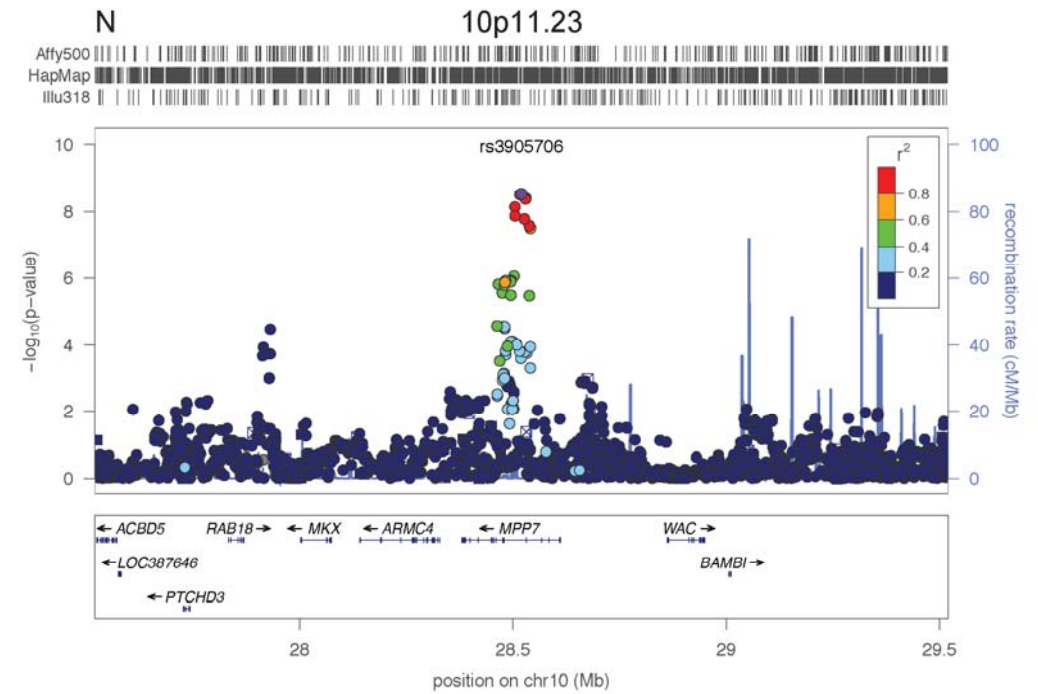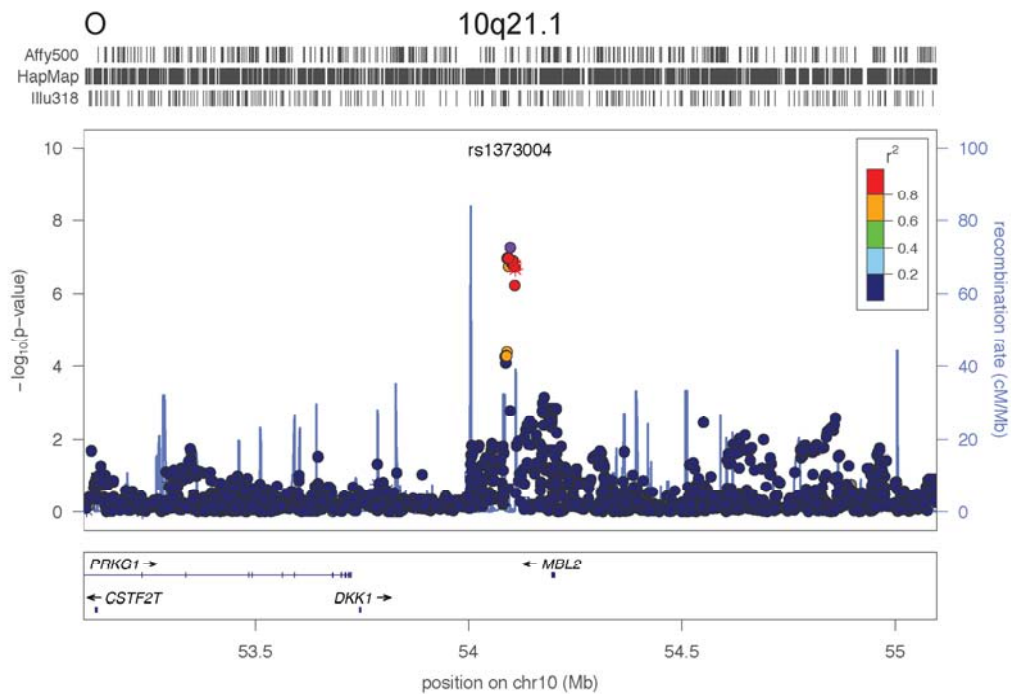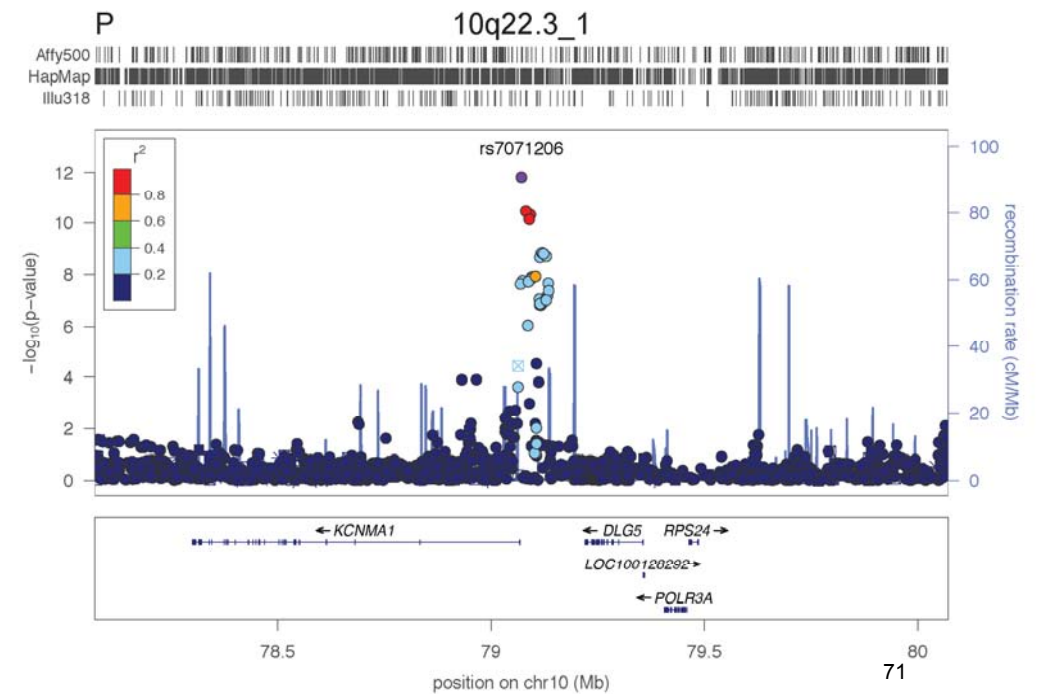

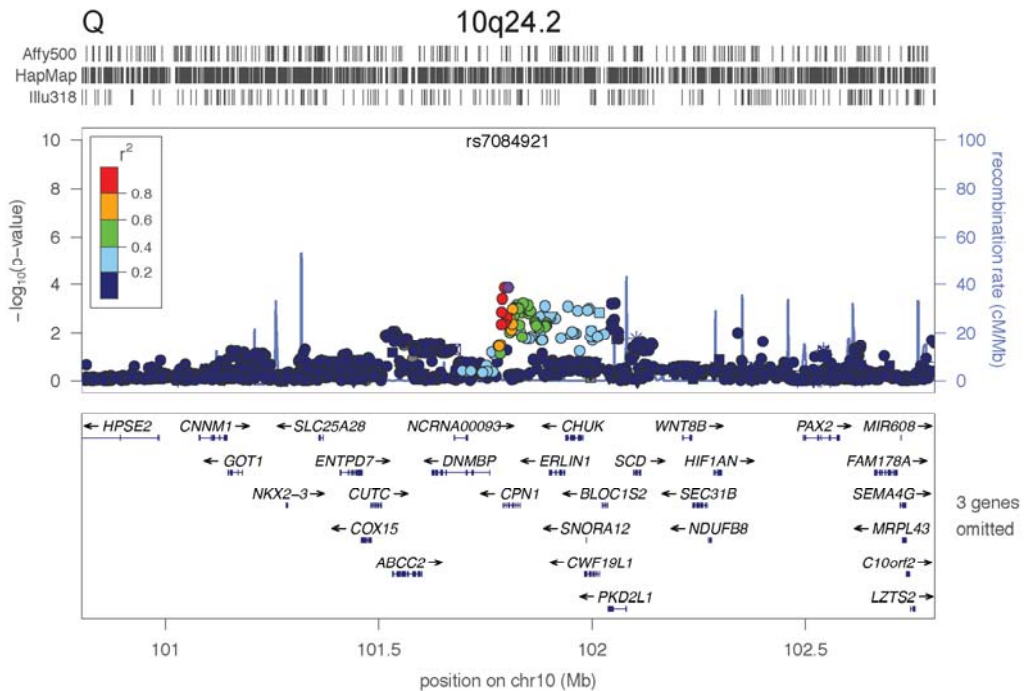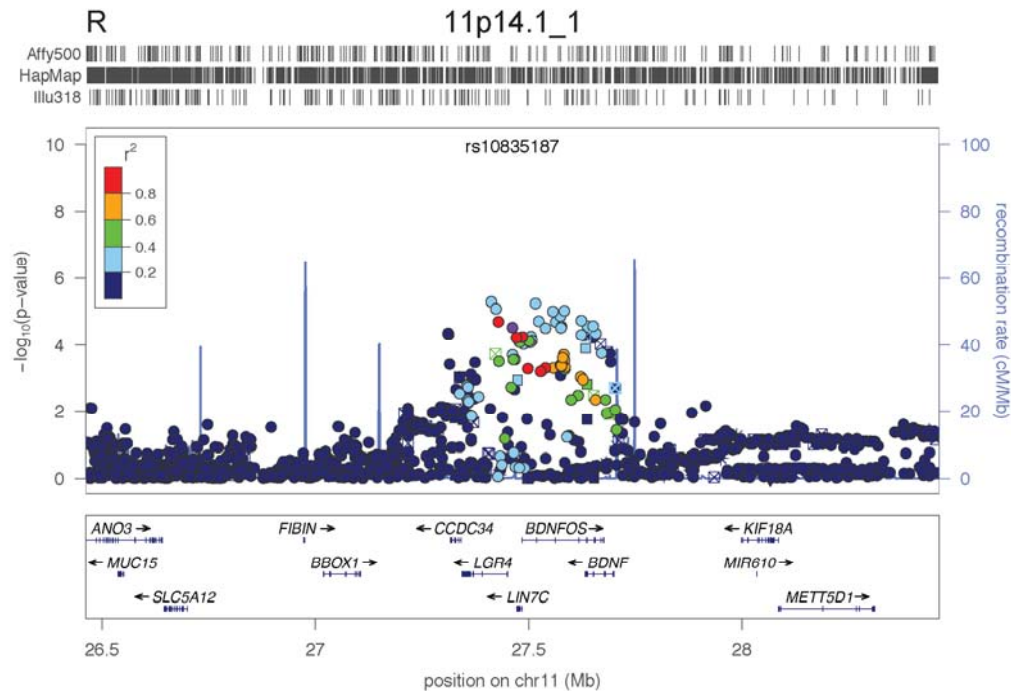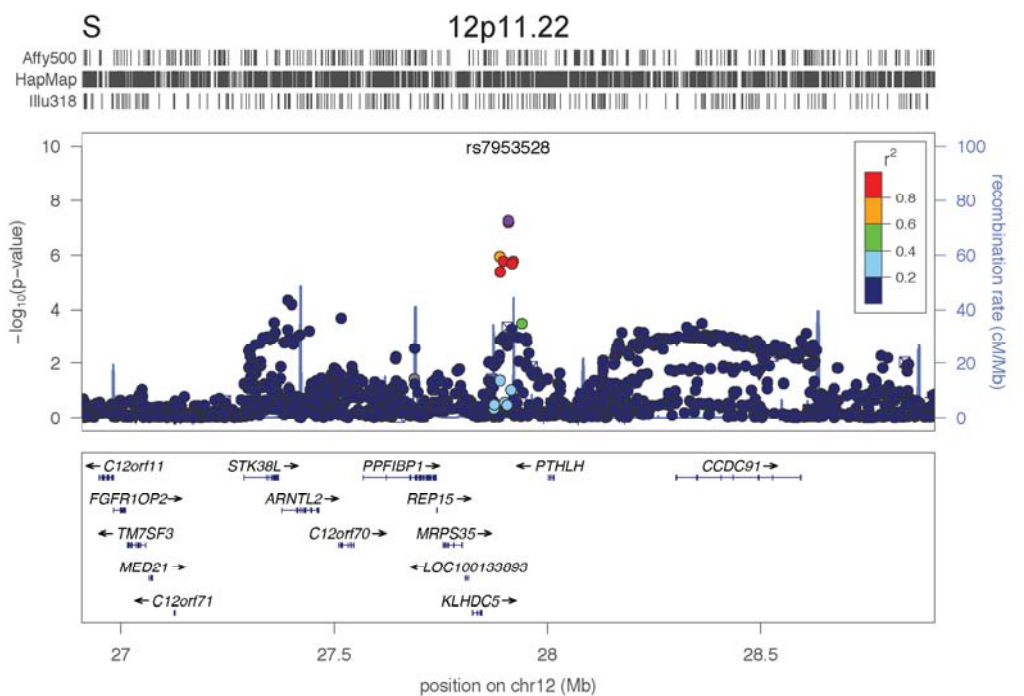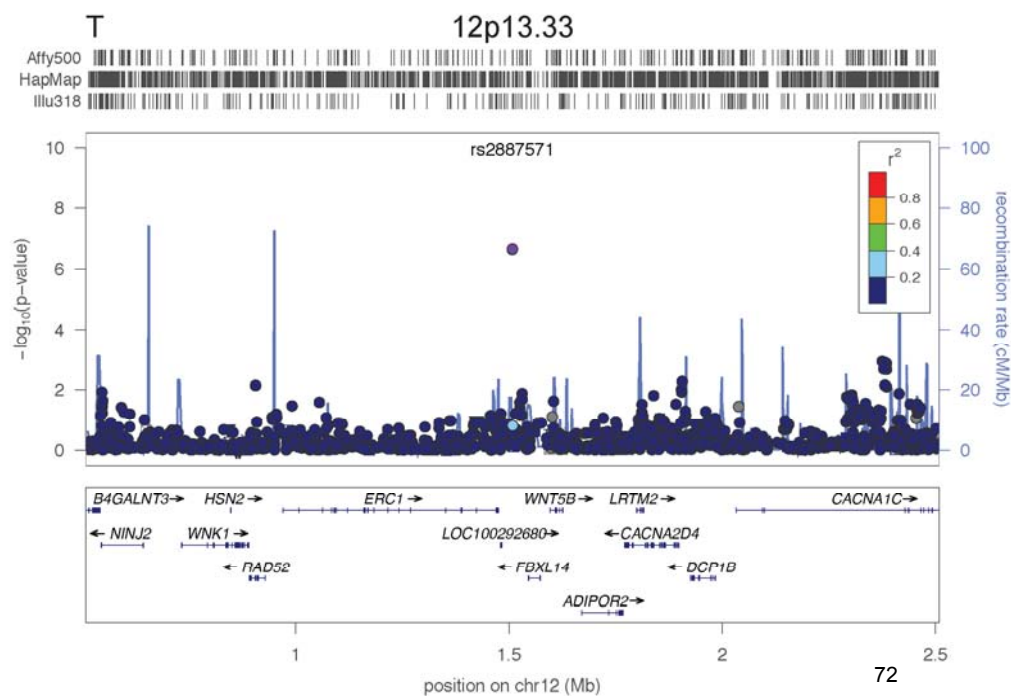



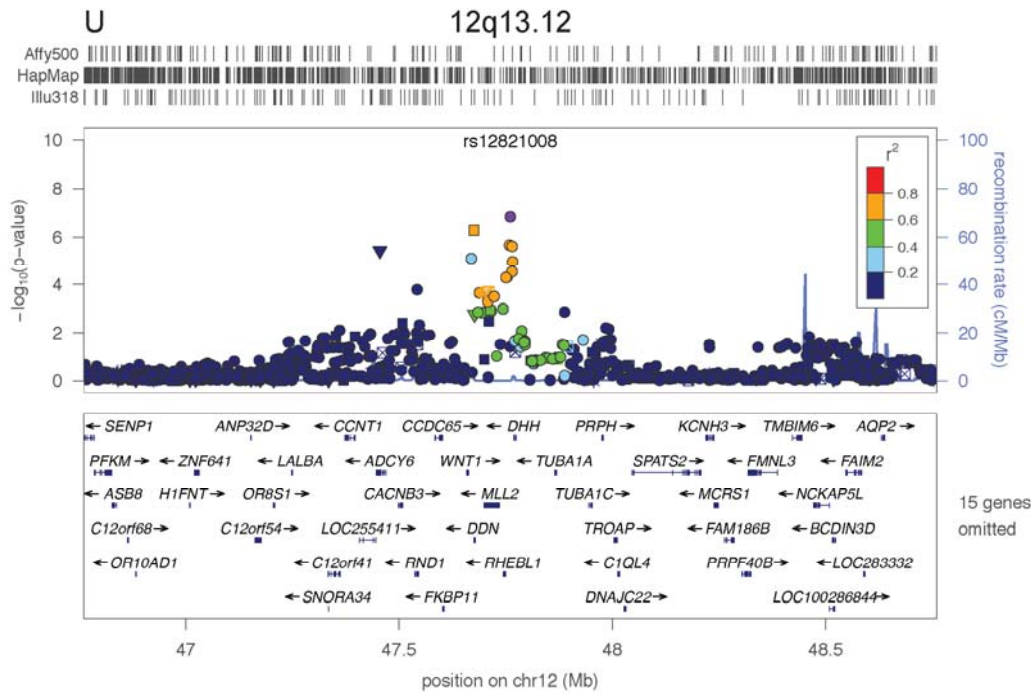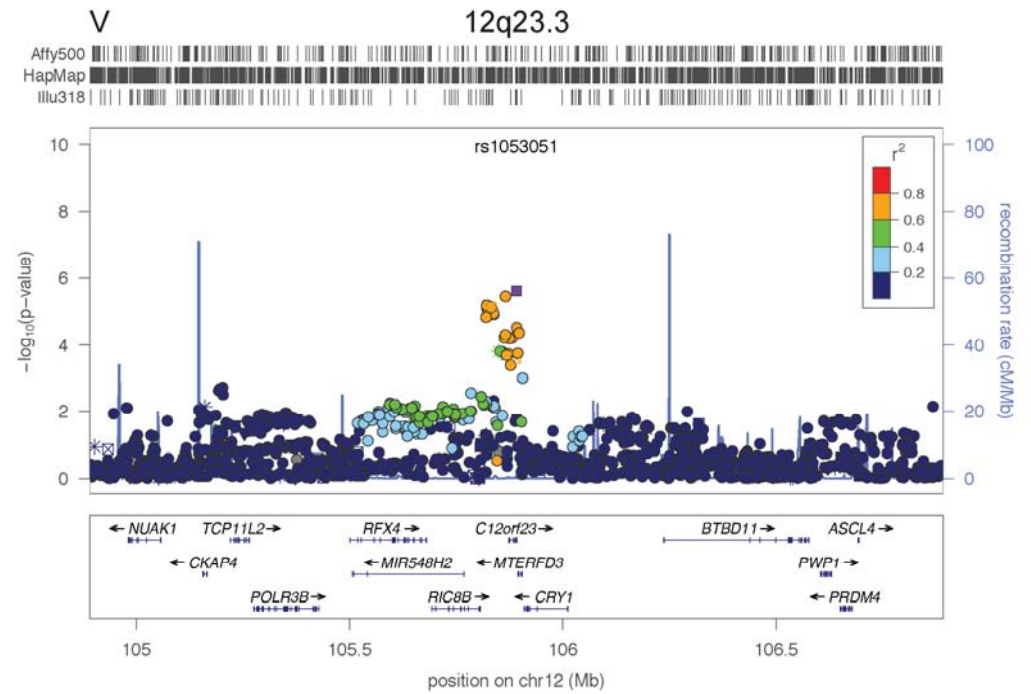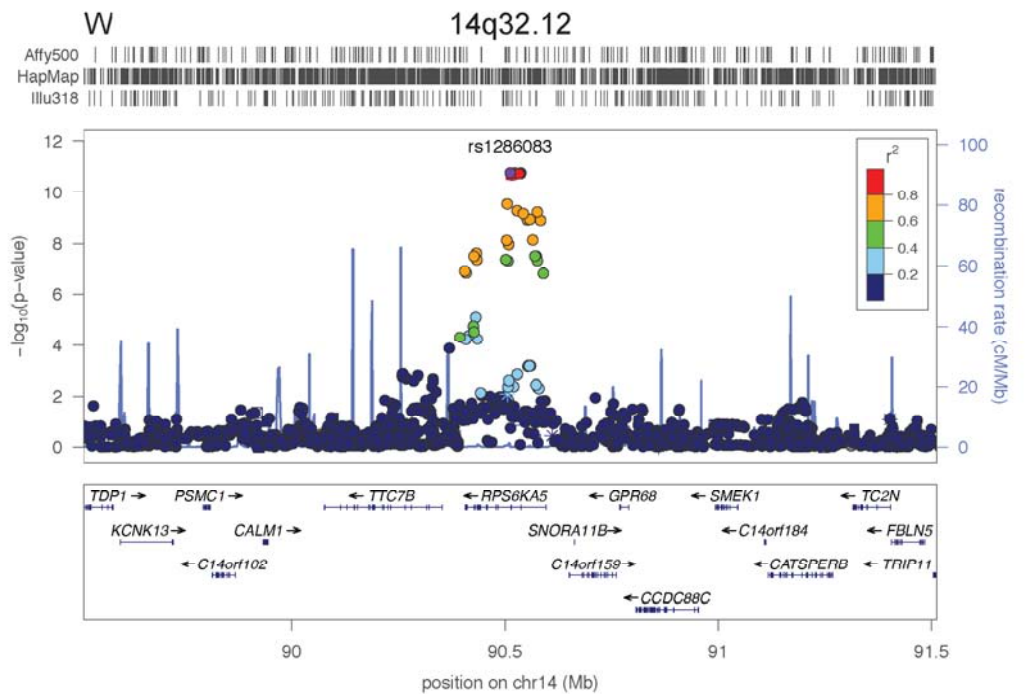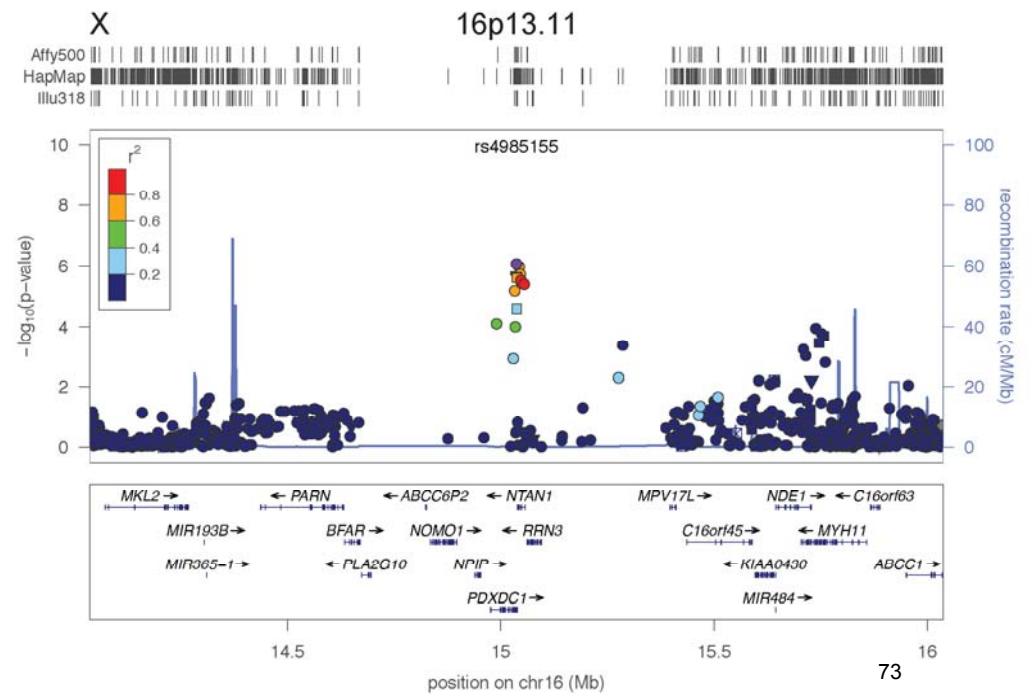

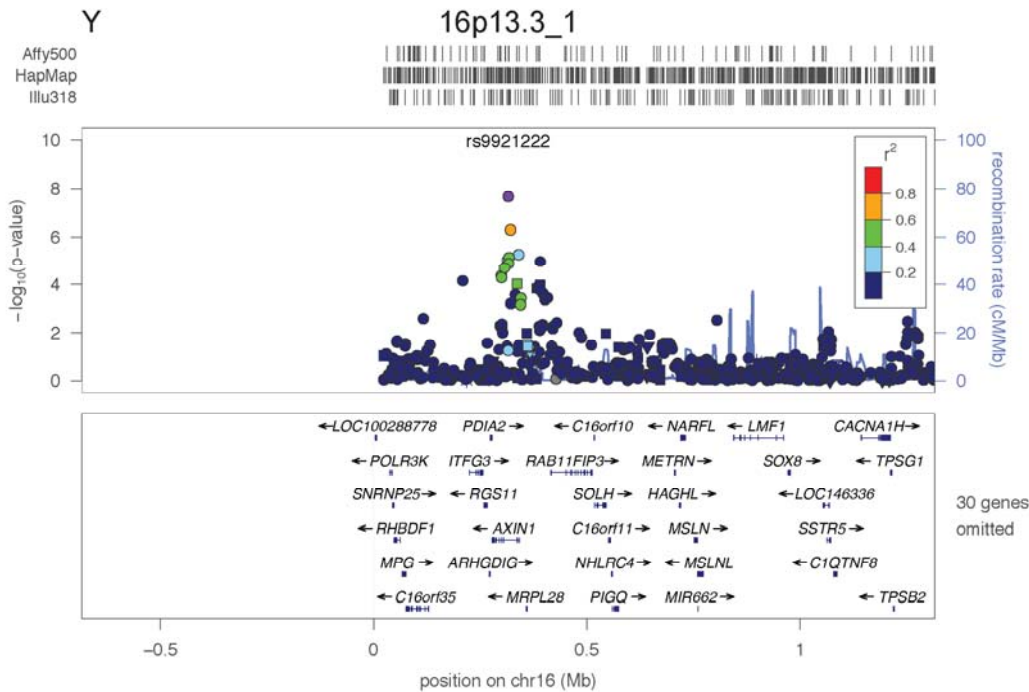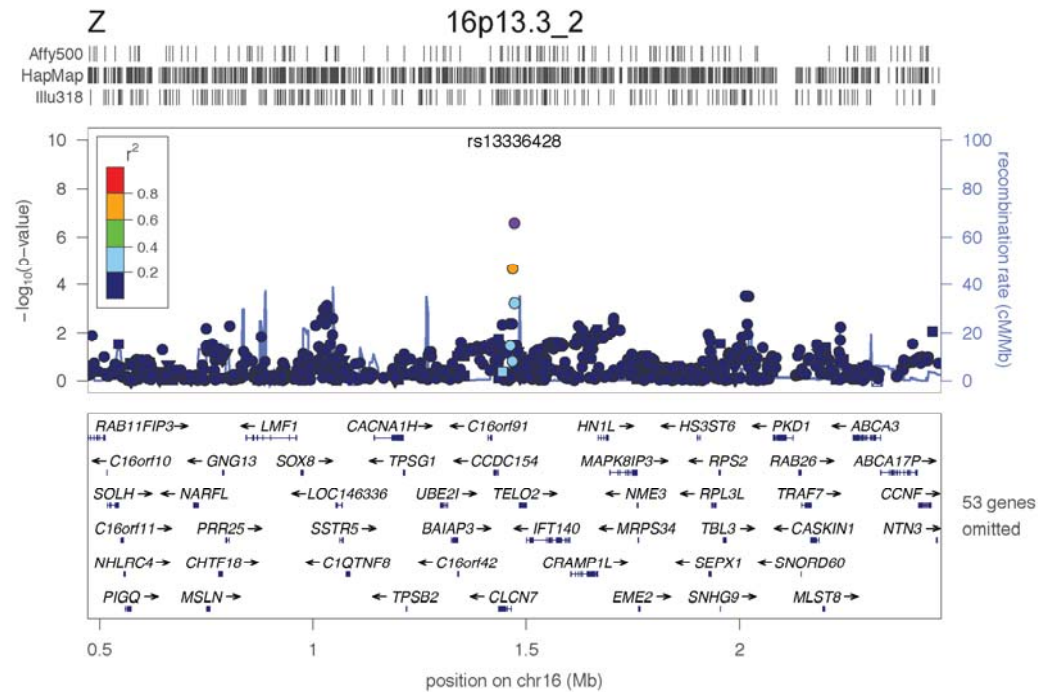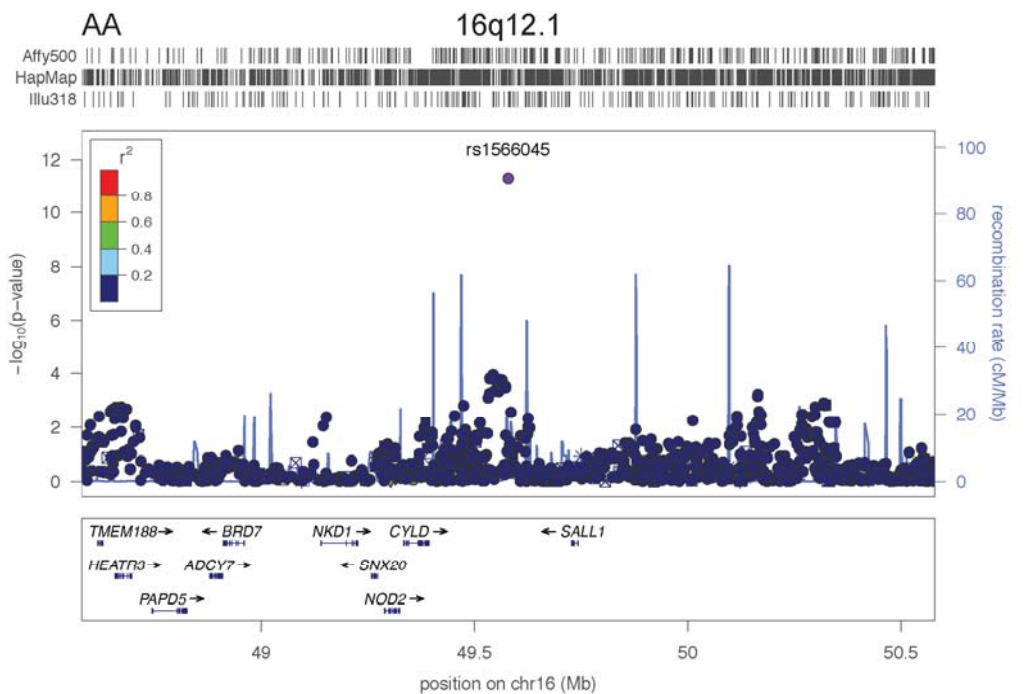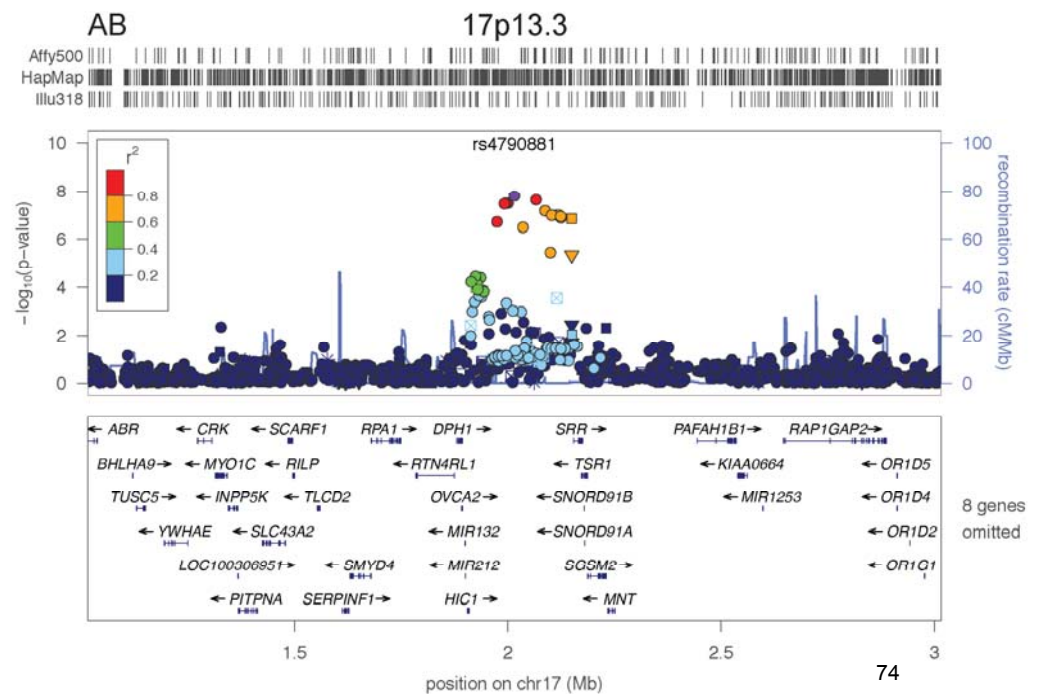

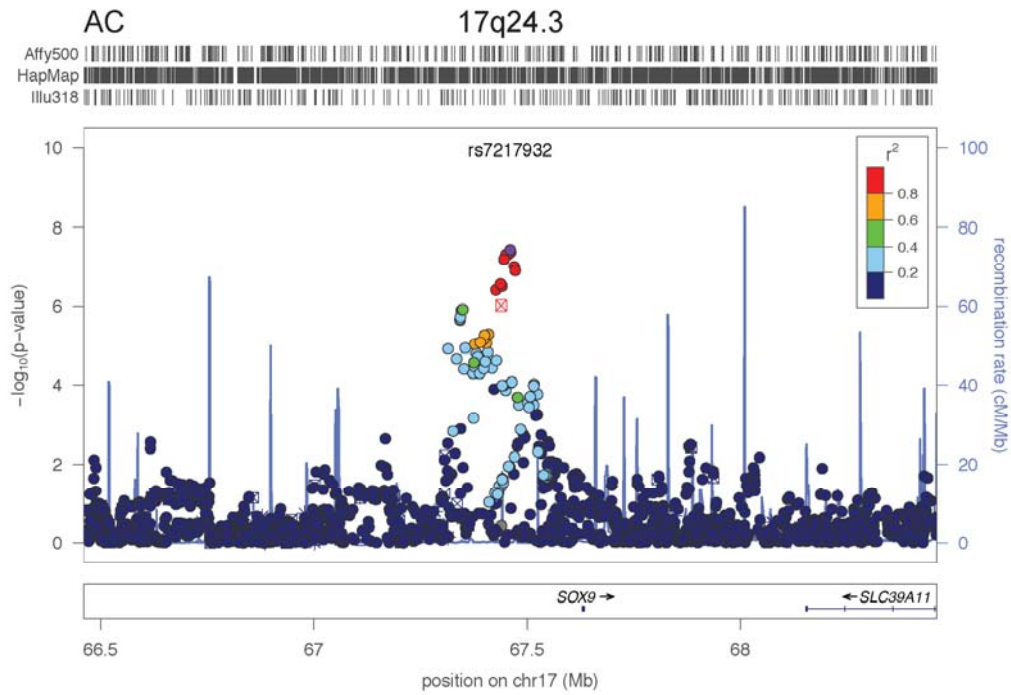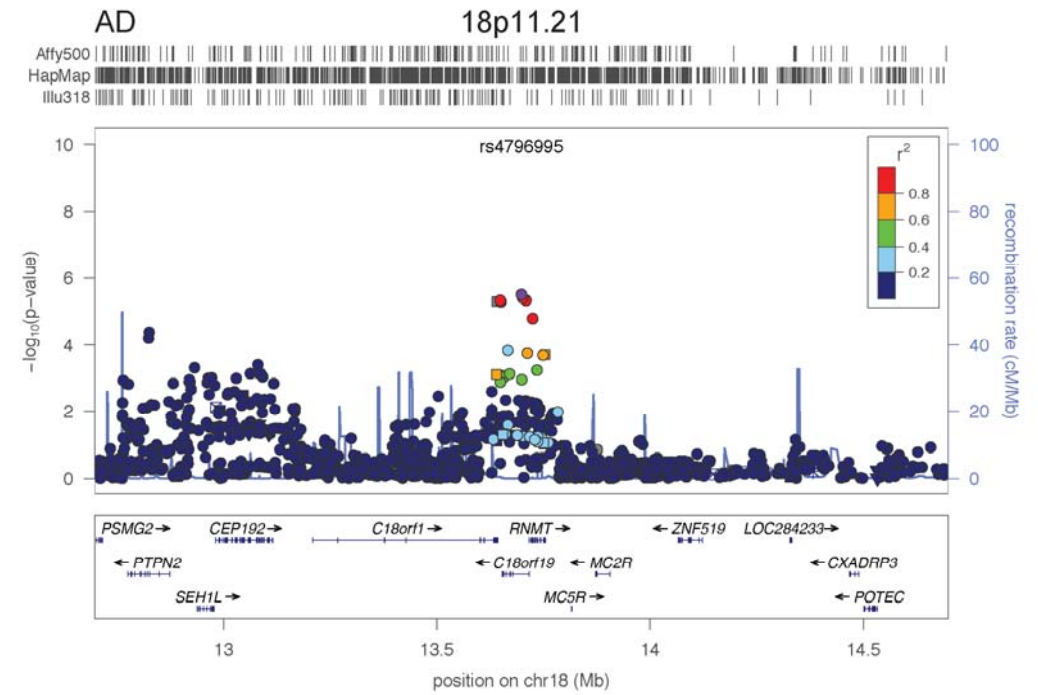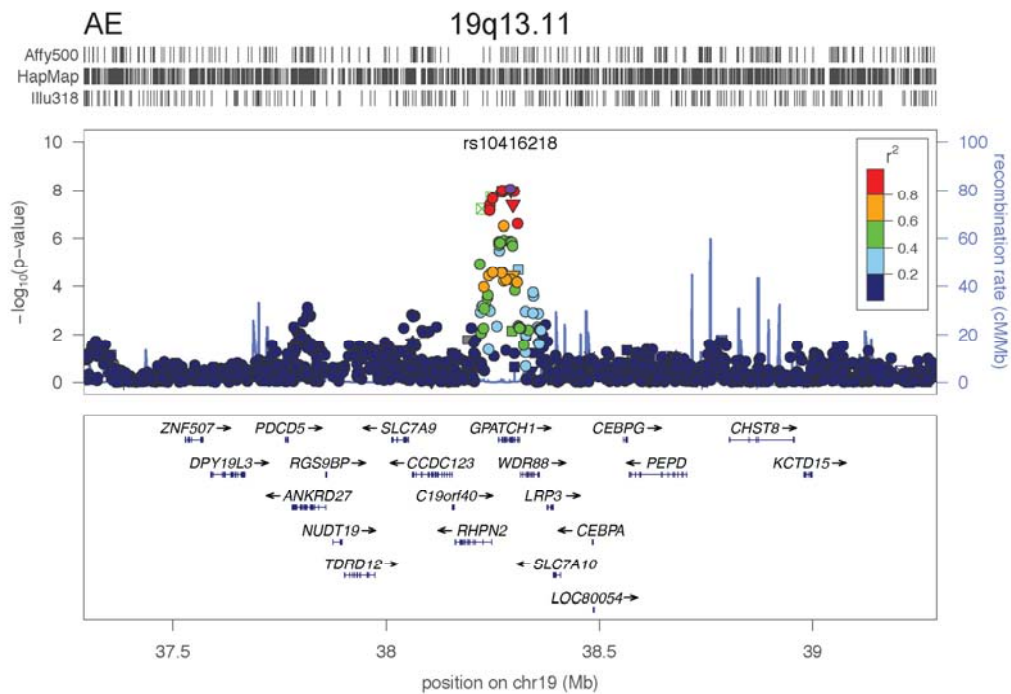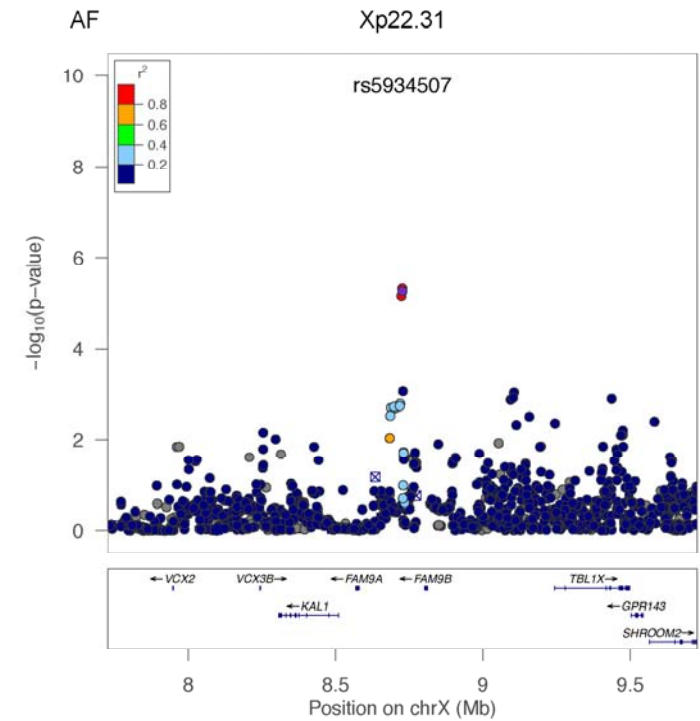

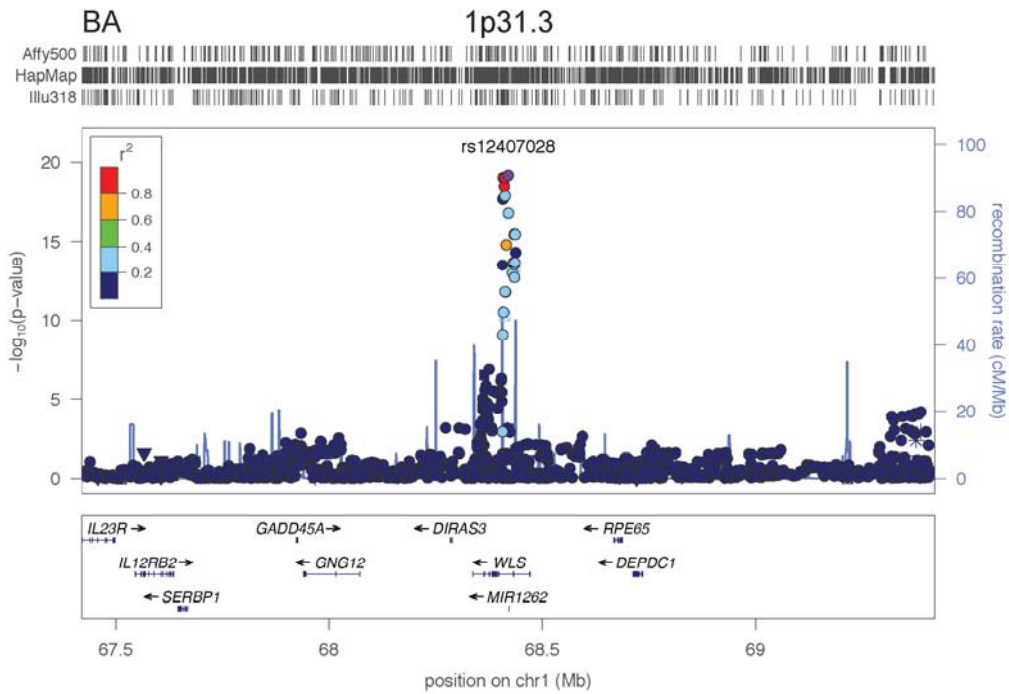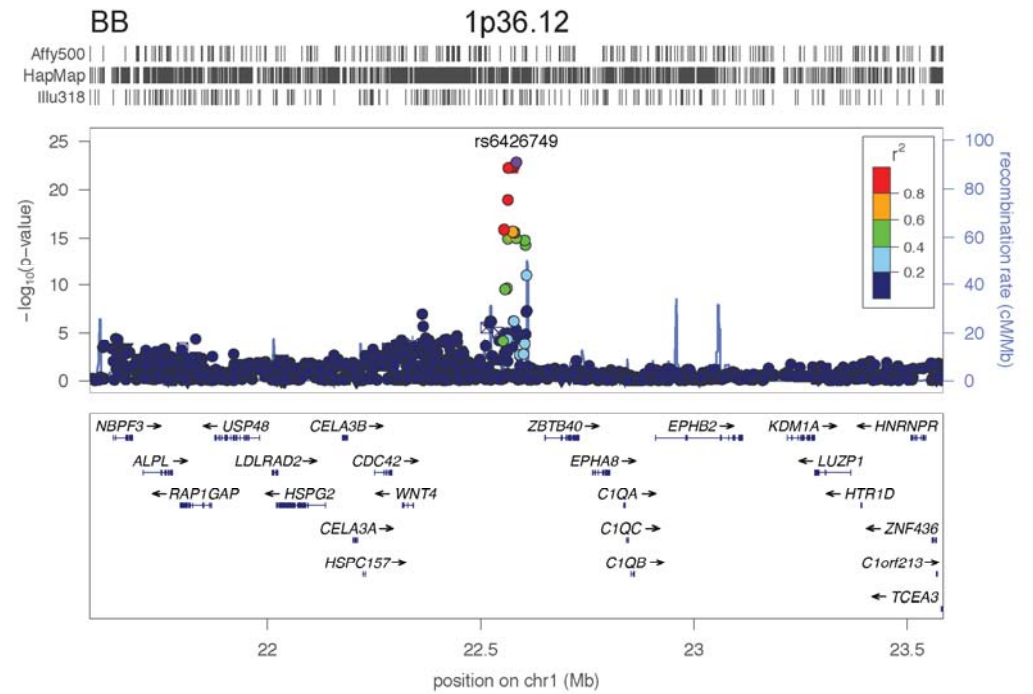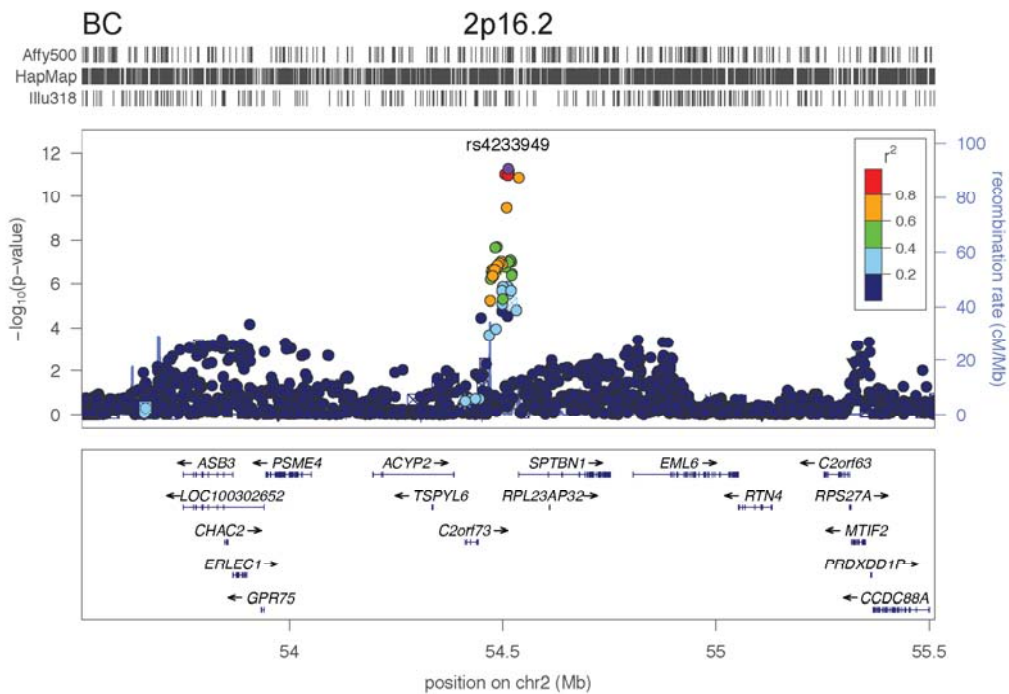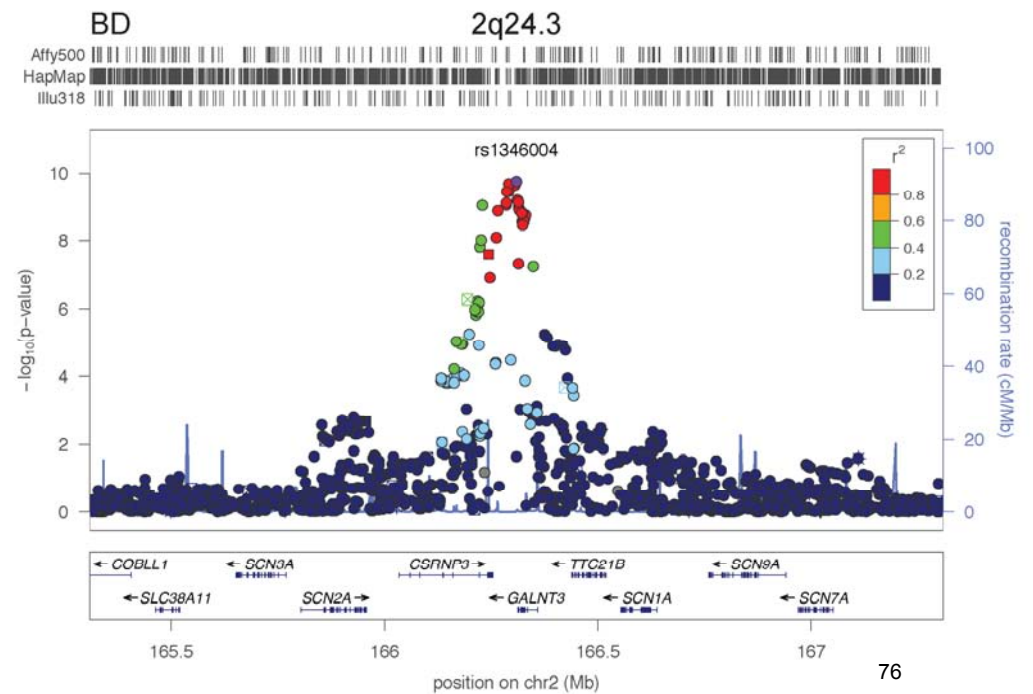

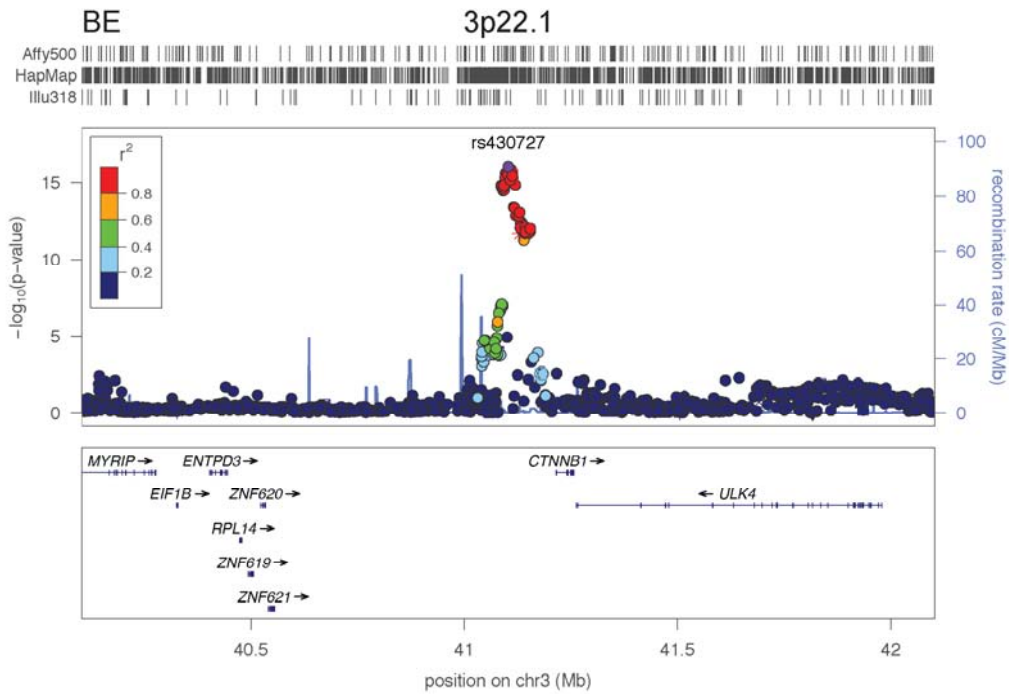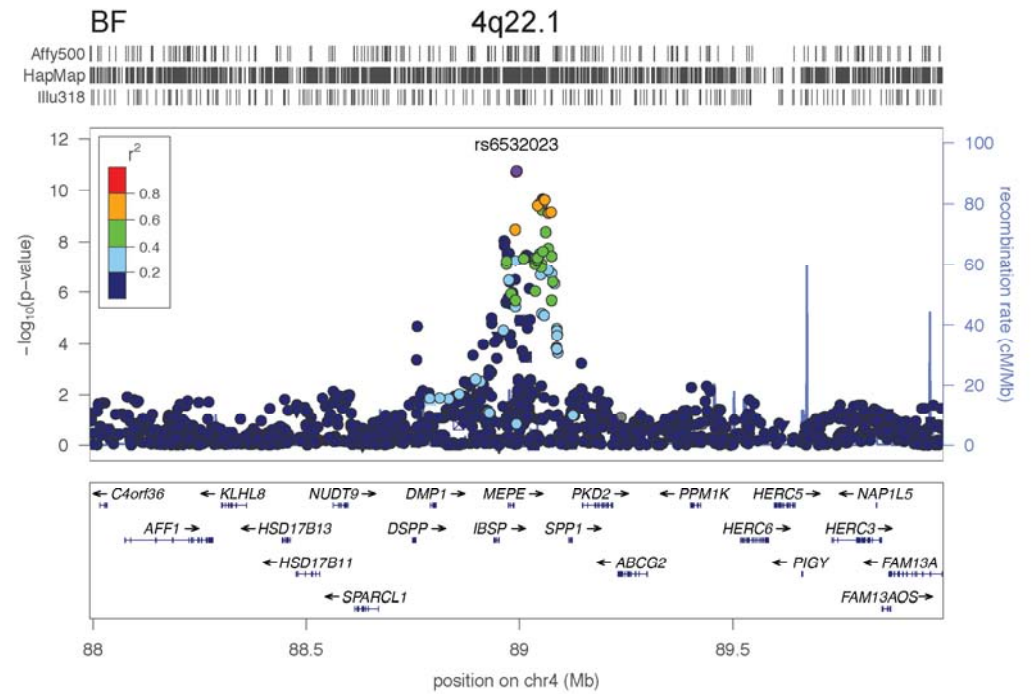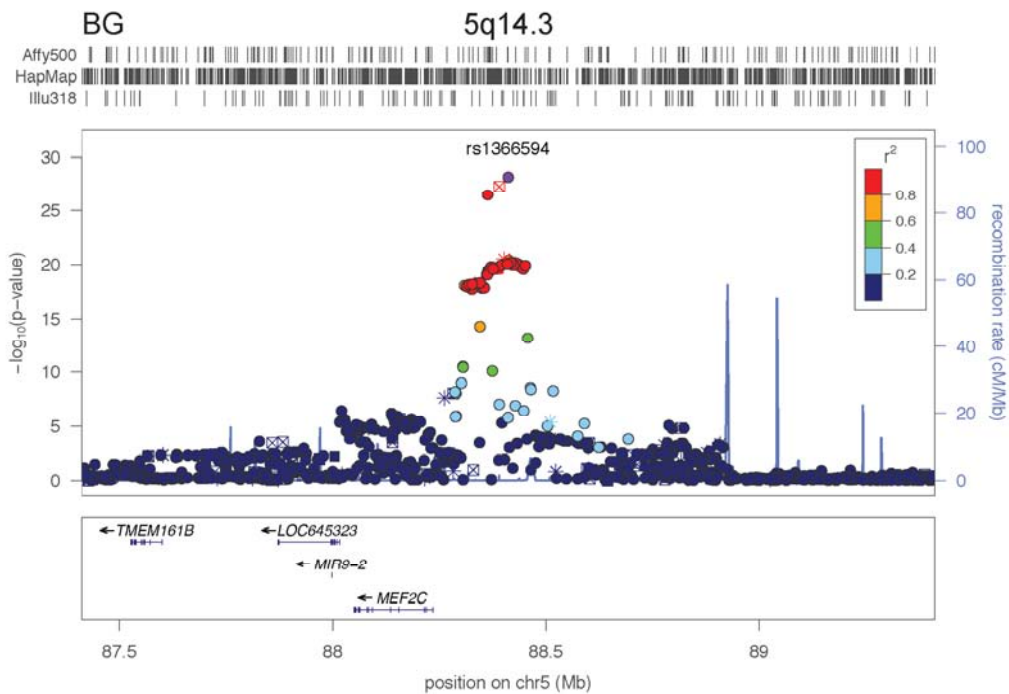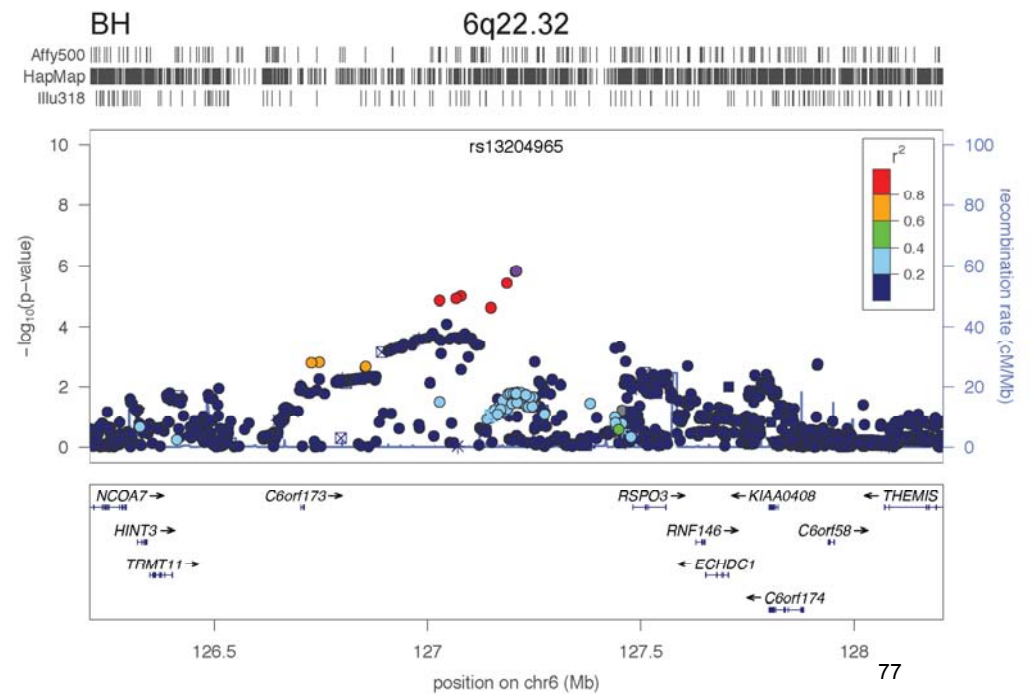

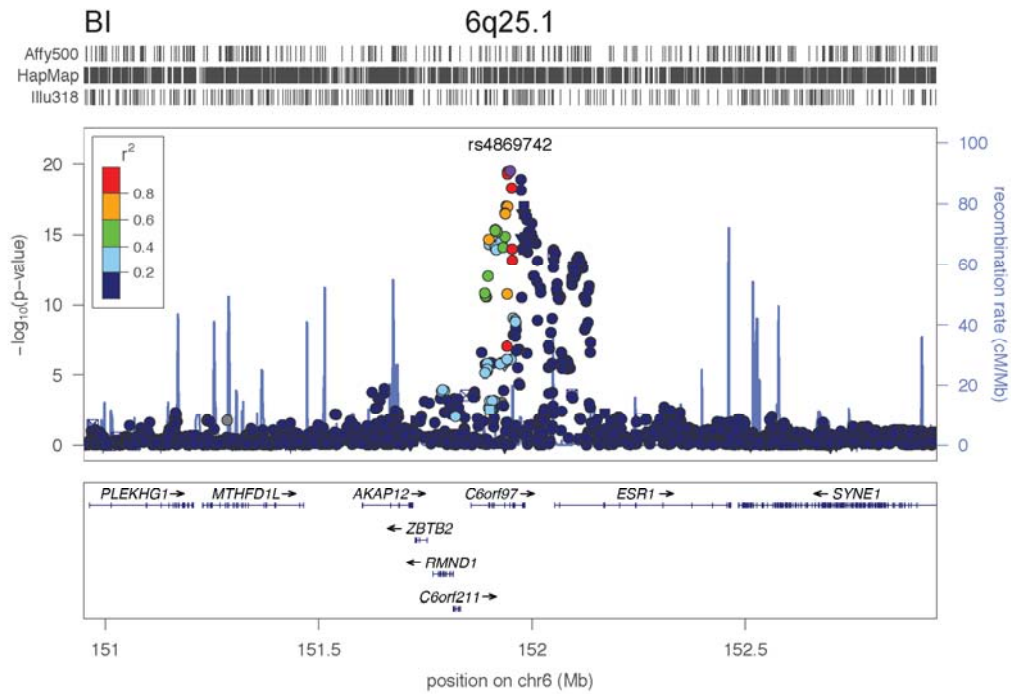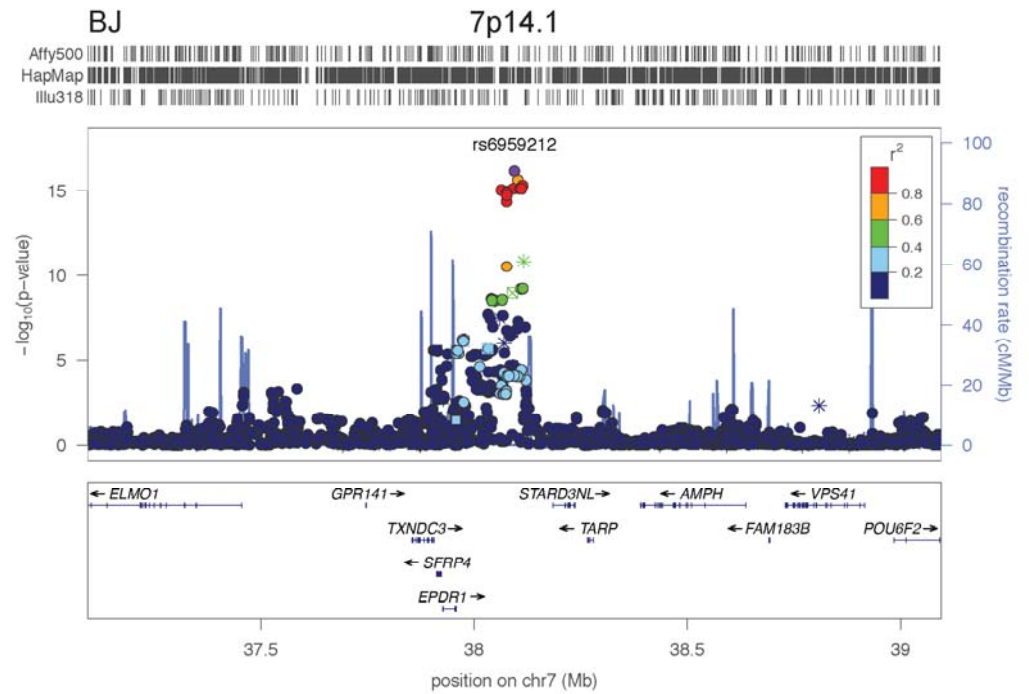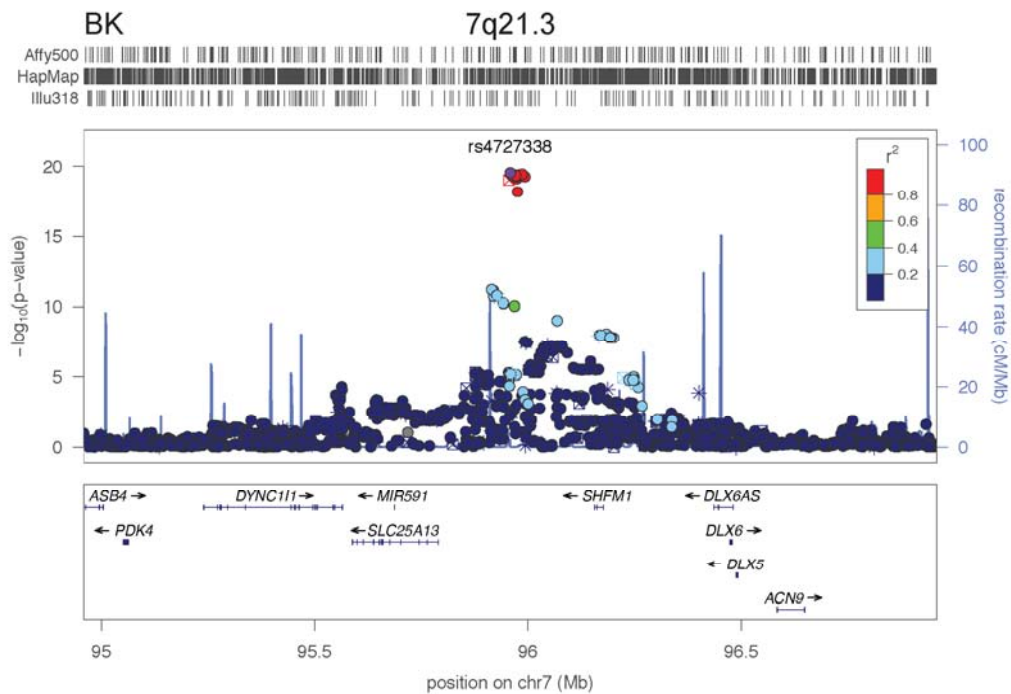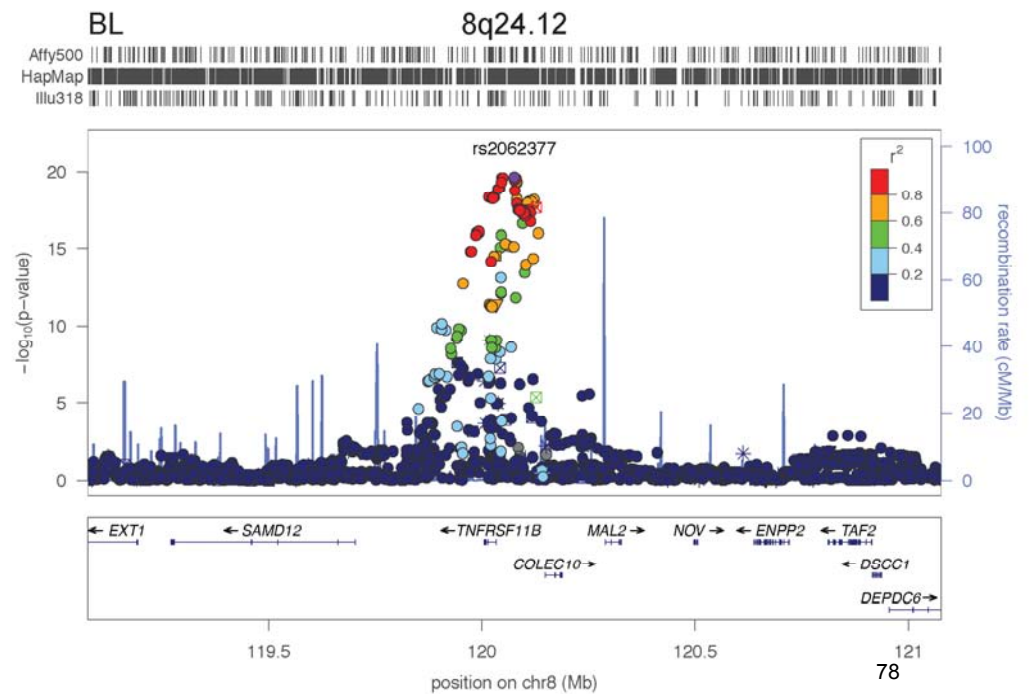

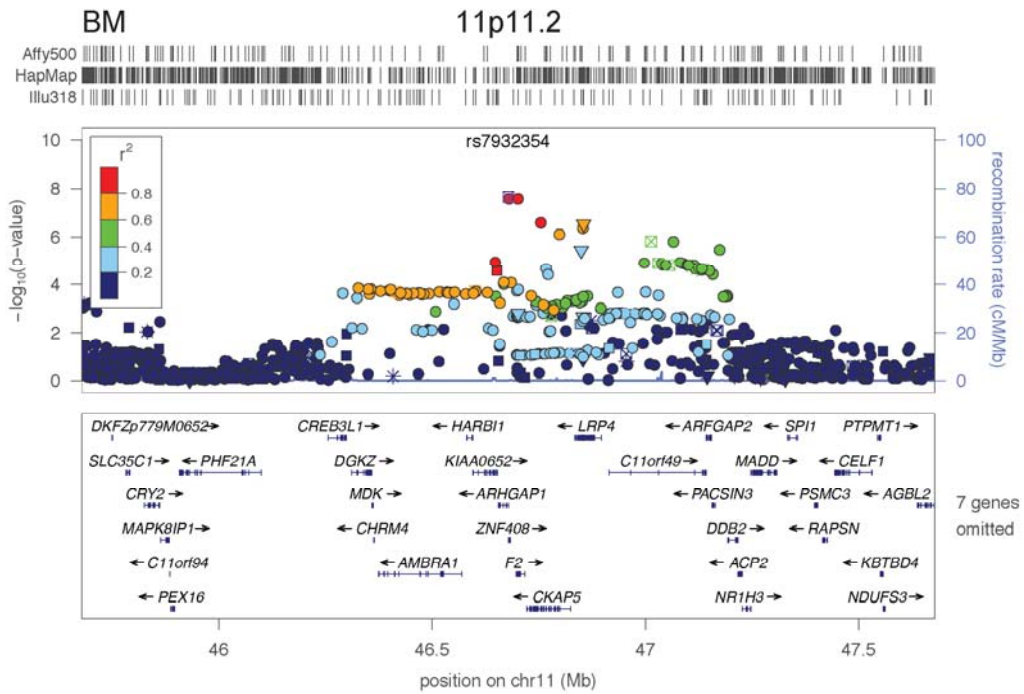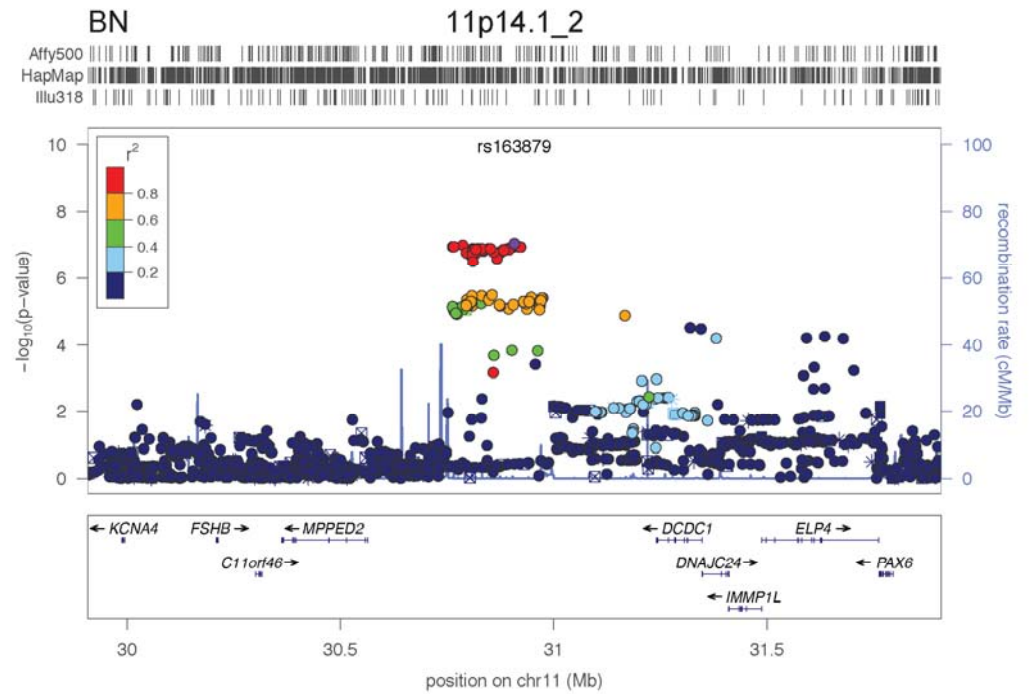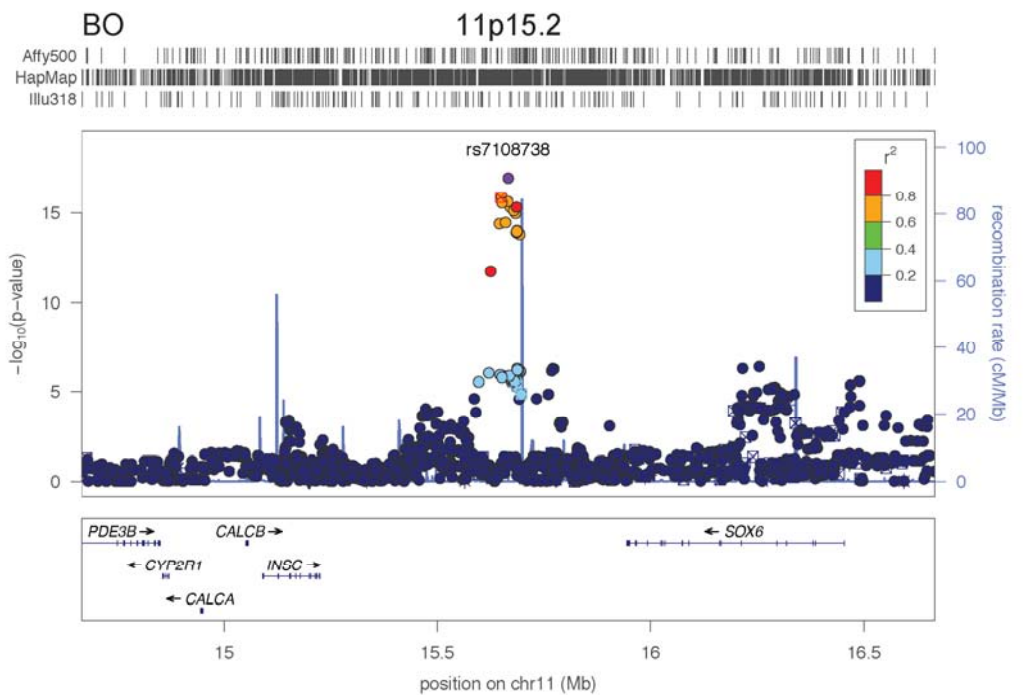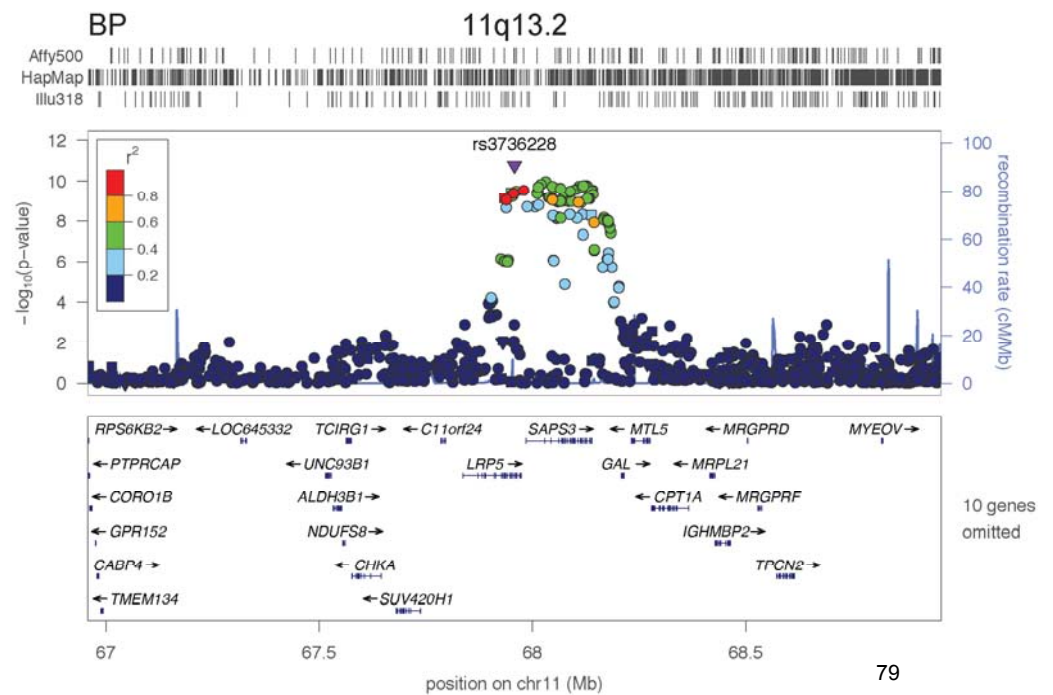

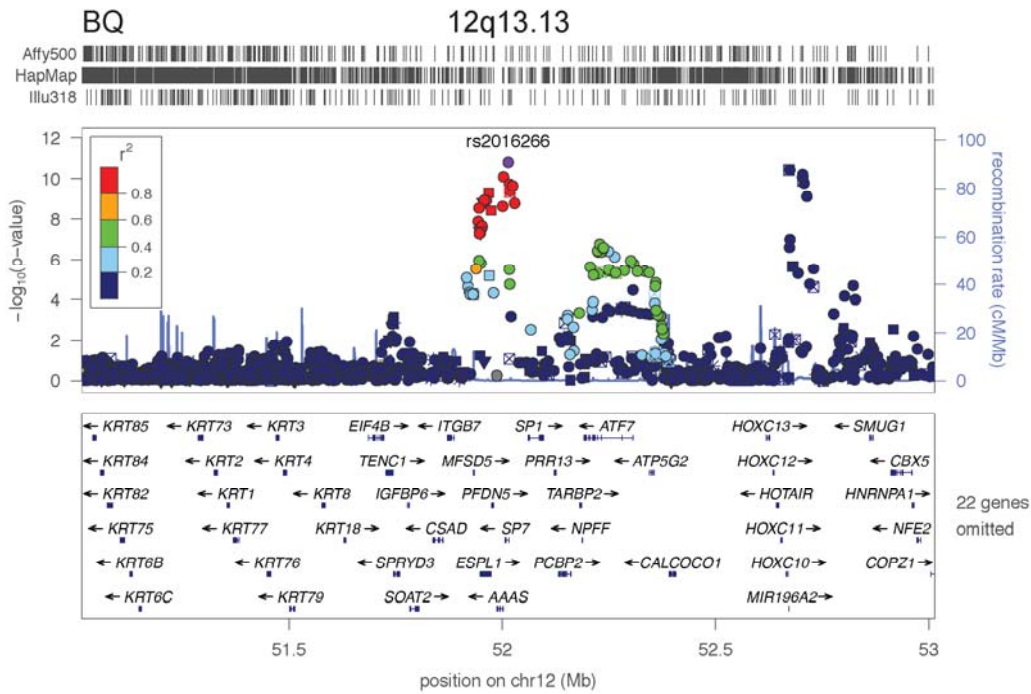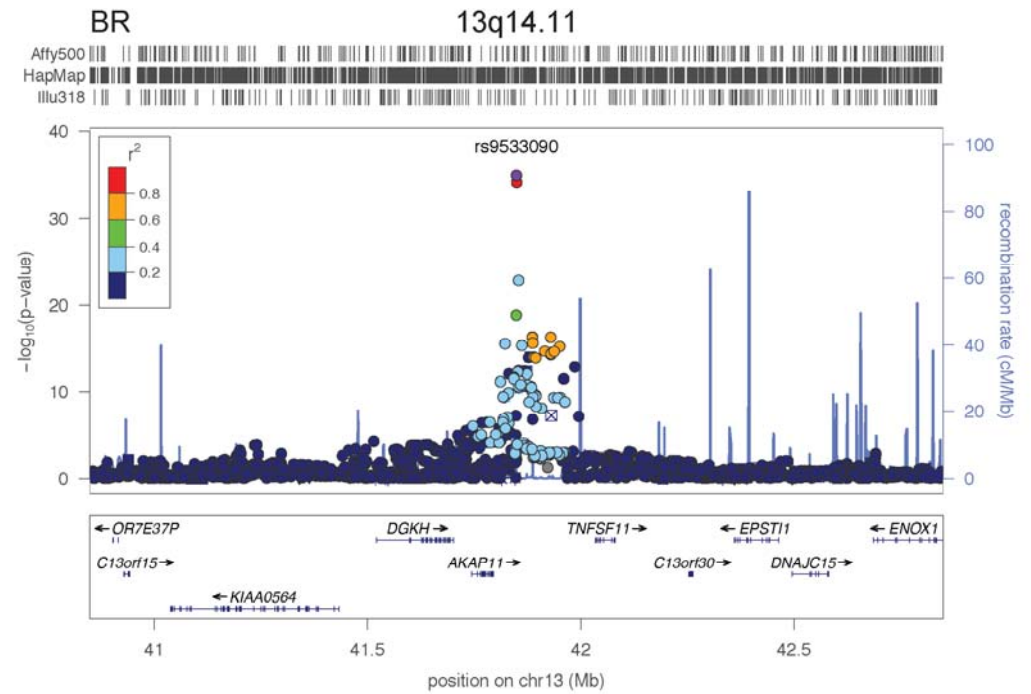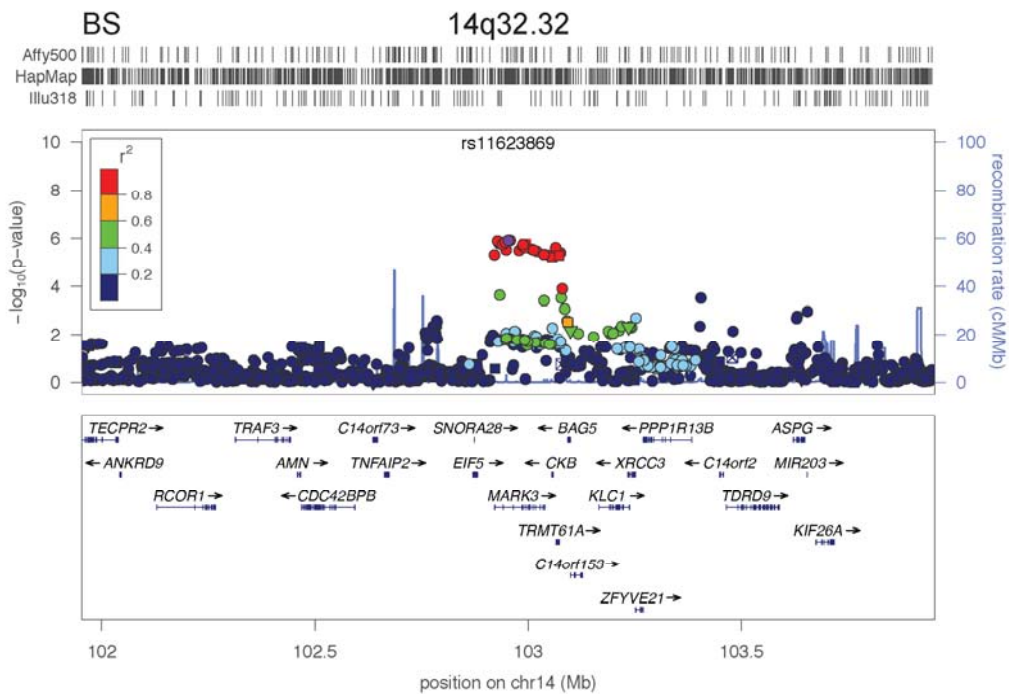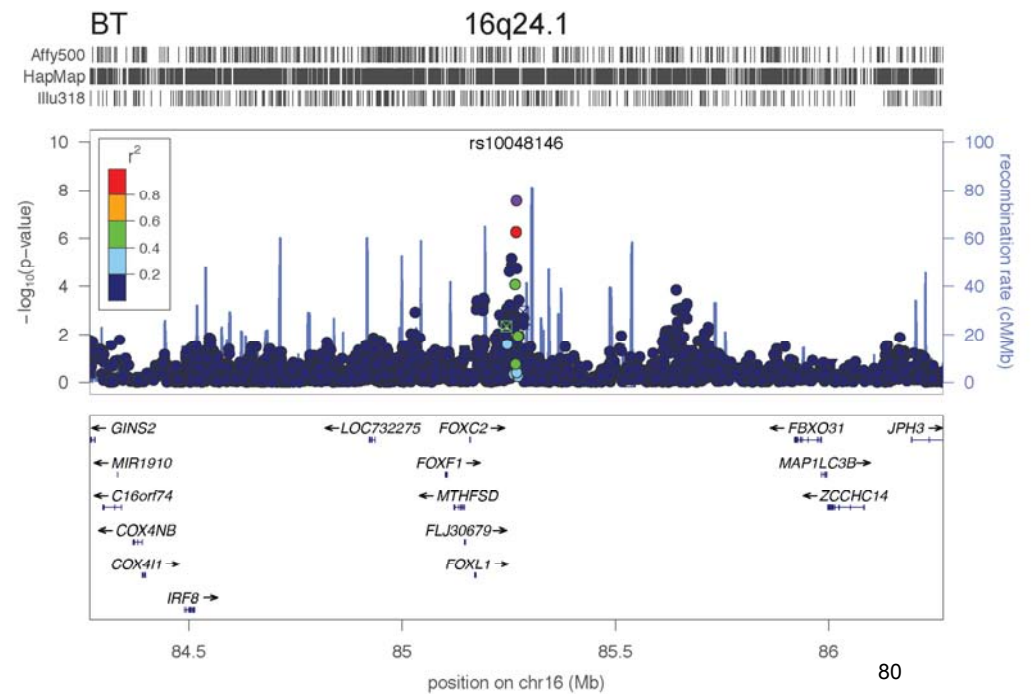



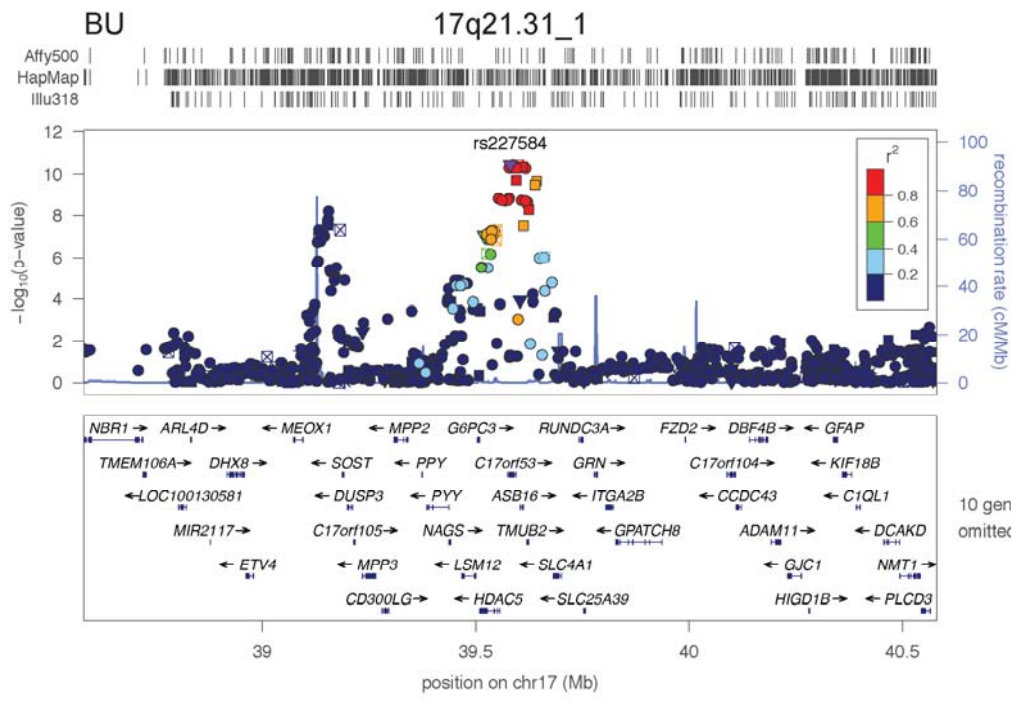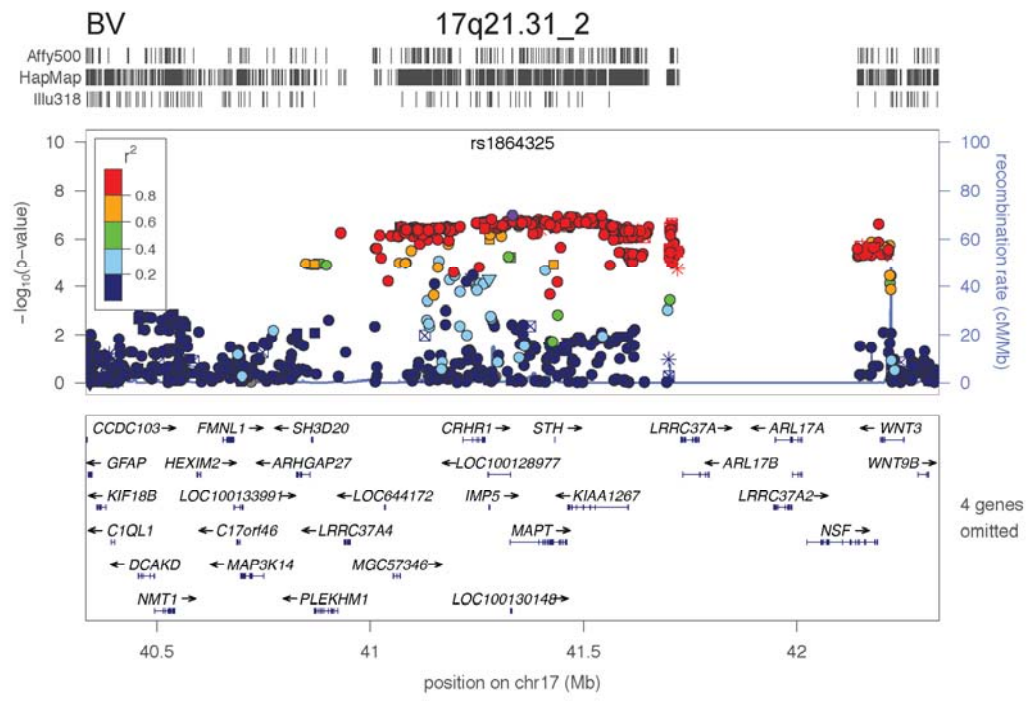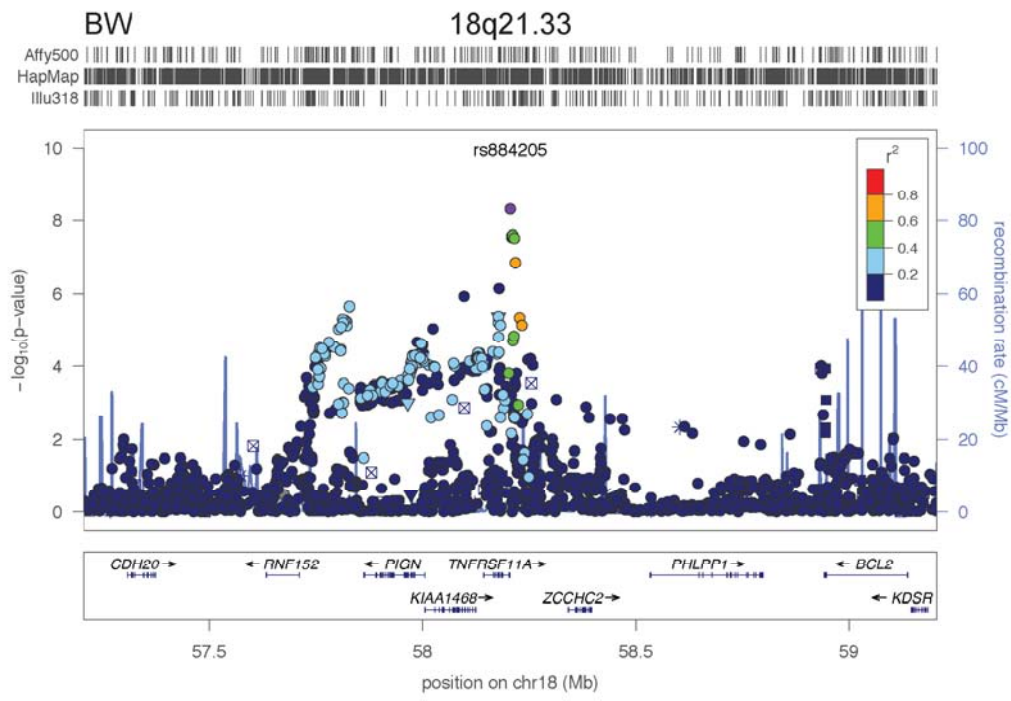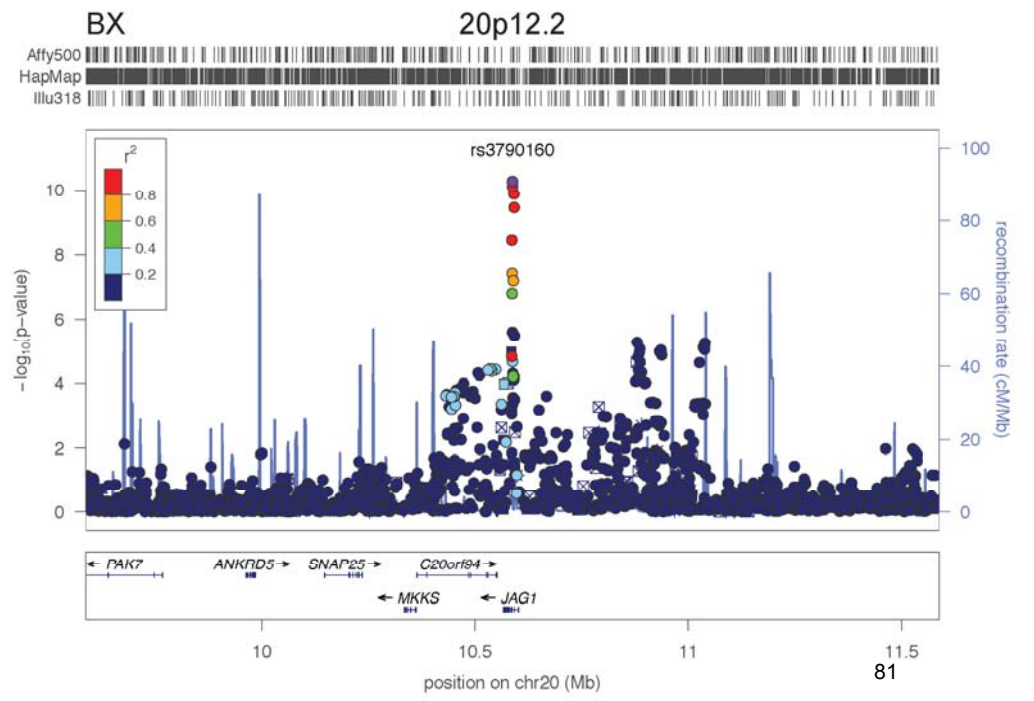

**Supplementary Figure 4.** Regional plots. Regional association plot for each of the 9 secondary signals after conditioning for the index SNP. The secondary signal is highlighted with a red box. A. 1p31.3, B. 1p36.12, C. 6q25.1, D. 7p14.1, E. 7q31.31, F. 12q13.13, G. 13q14.11, H. 16q12.1, I. 17q21.31.

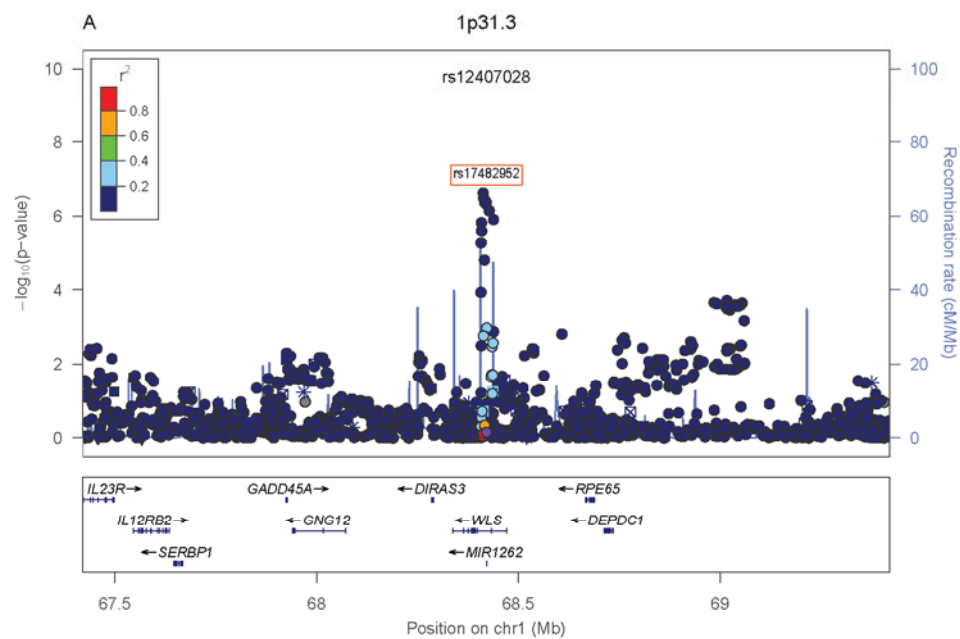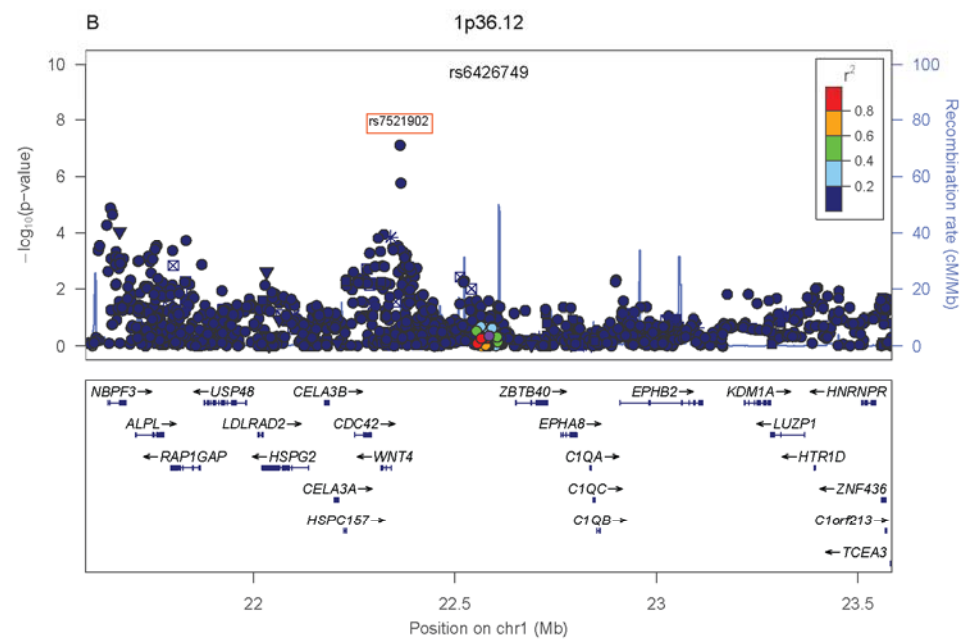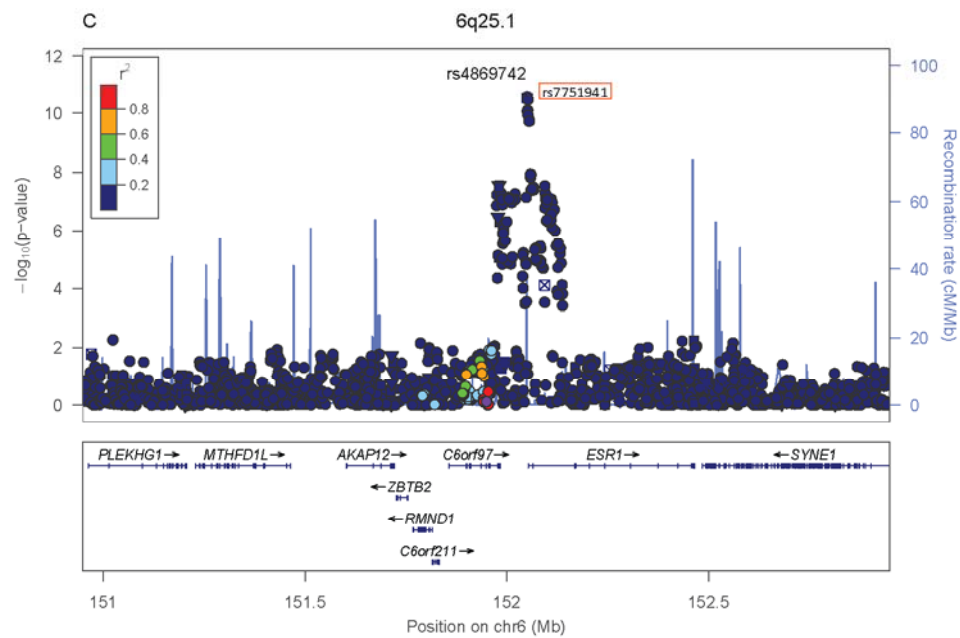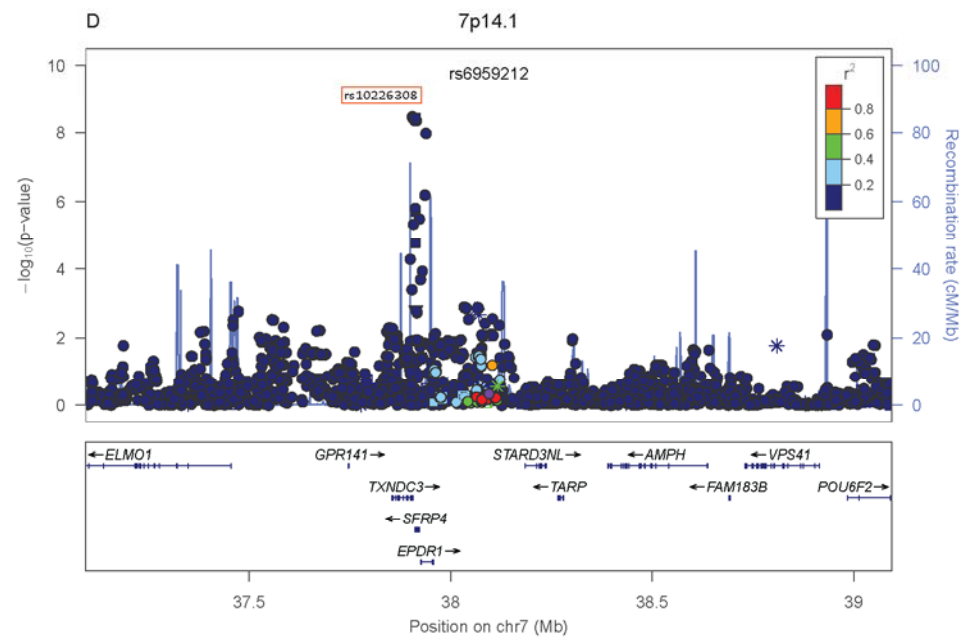

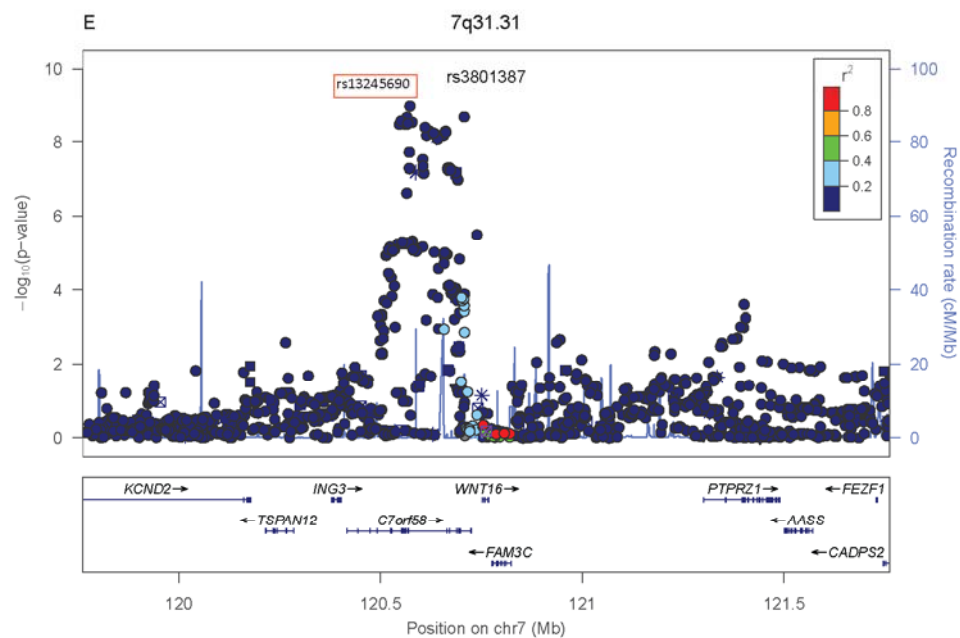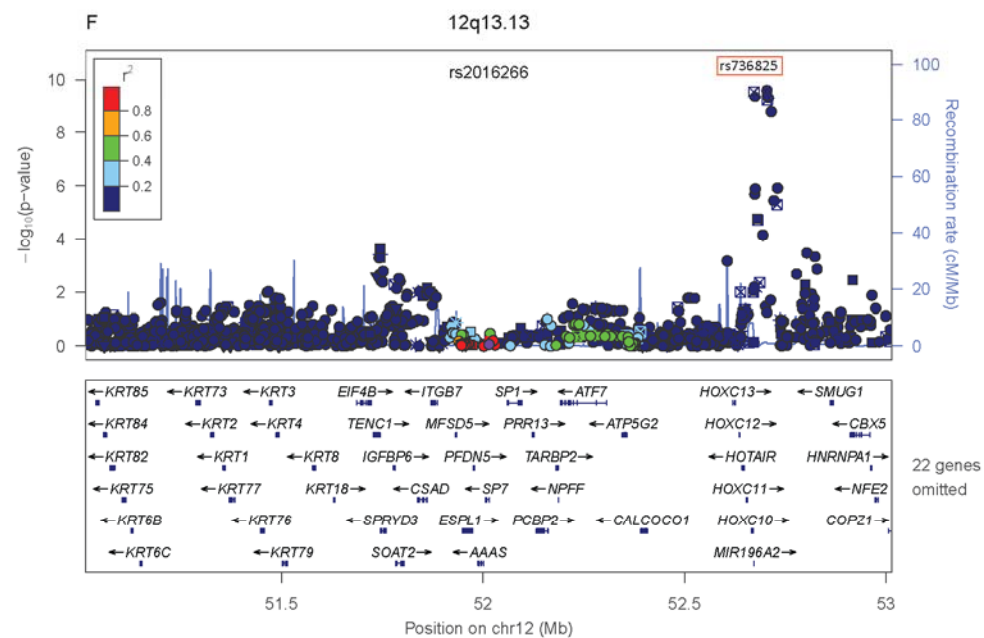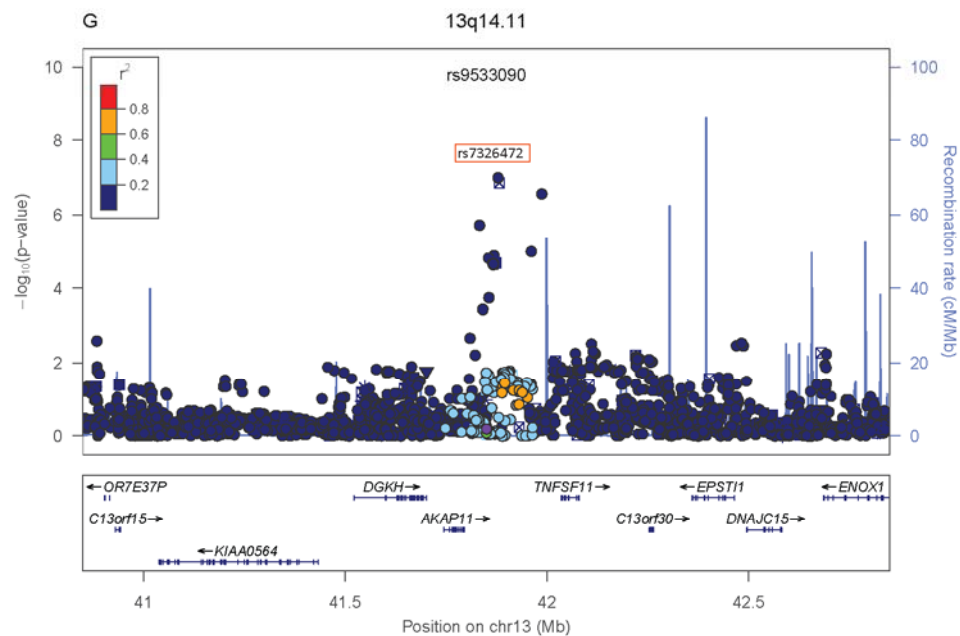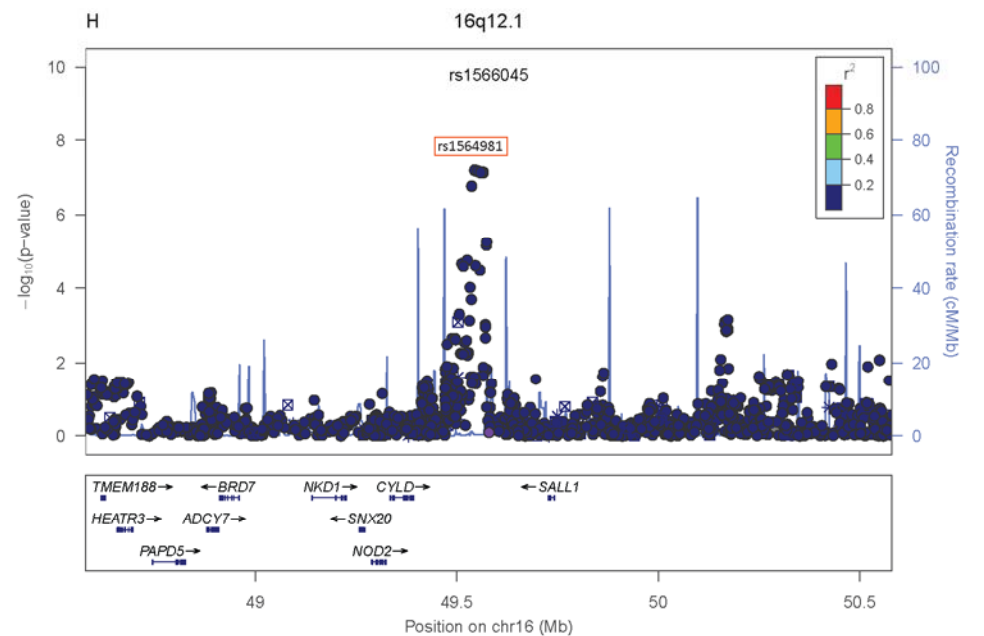

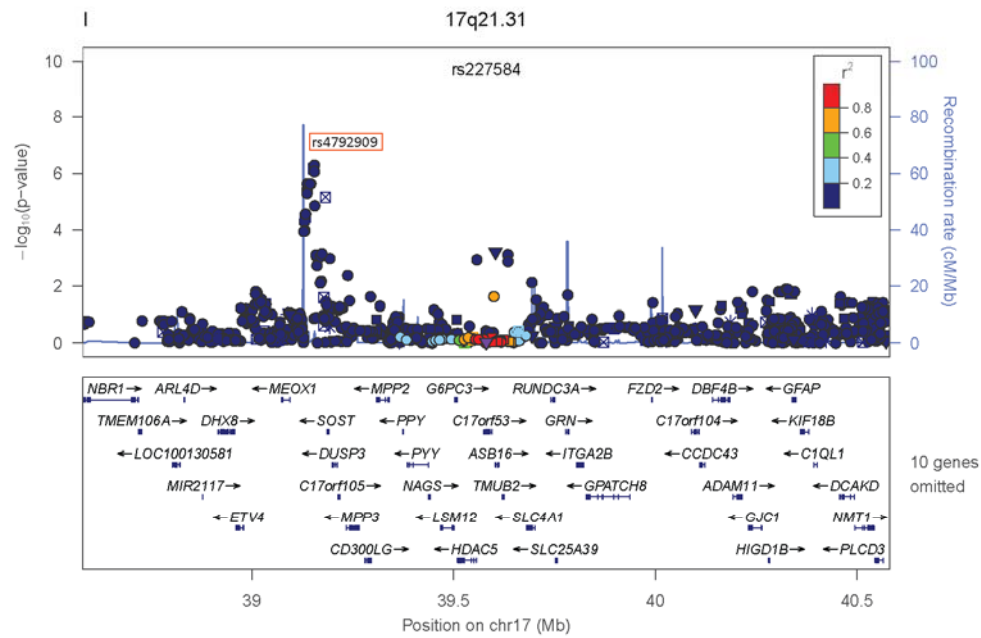

**Supplementary Figure 5.** QQ plots for gene-gene interaction results on 3311 SNP-SNP pairs. A) Results for FN-BMD. B) Results for LS-BMD

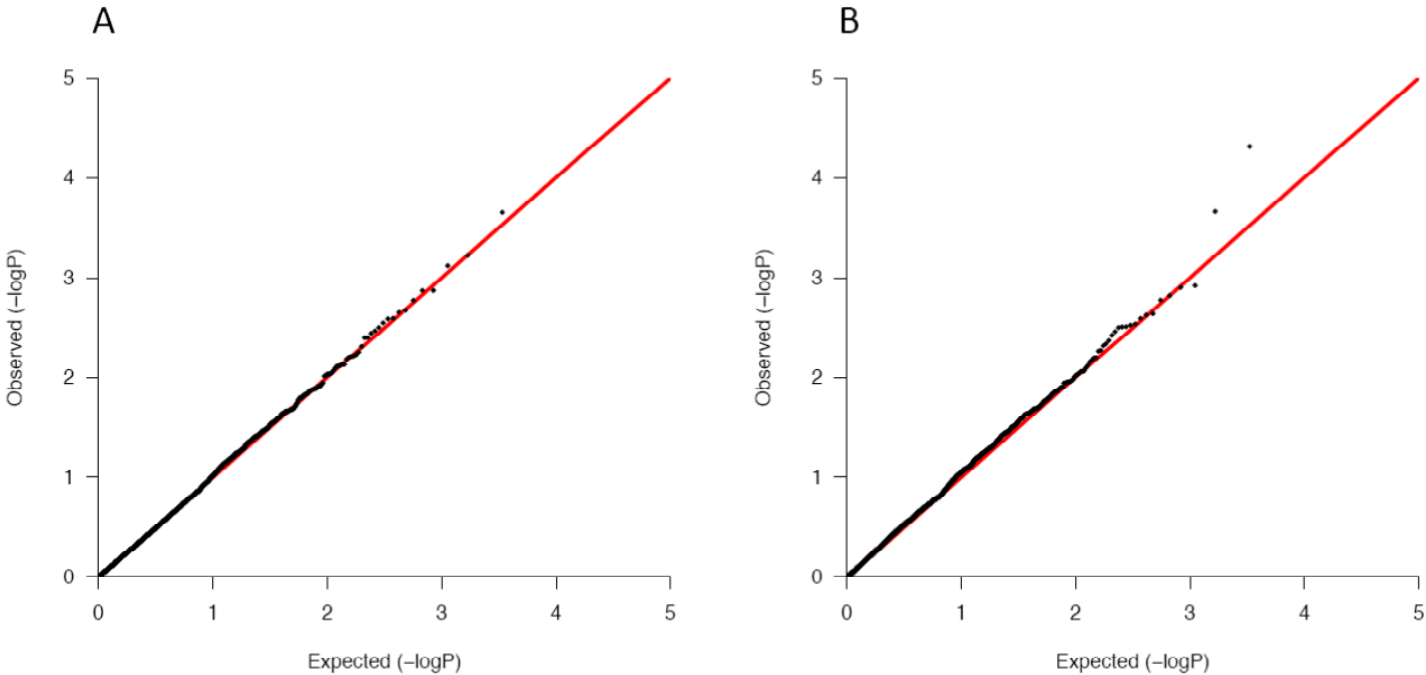

**Supplementary Figure 6.** Summary genetic effect estimates for the significant BMD associations. Genetic effect estimates for the 56 loci reaching GWS in the overall meta-analysis (17 discovery and 34 replication studies; n=50,933) are shown for FNBMD (green circles) and LSBMD (red circles). Significant genetic associations are shown separately for the 32 loci that were novel (A) and the 24 loci reported previously (B).

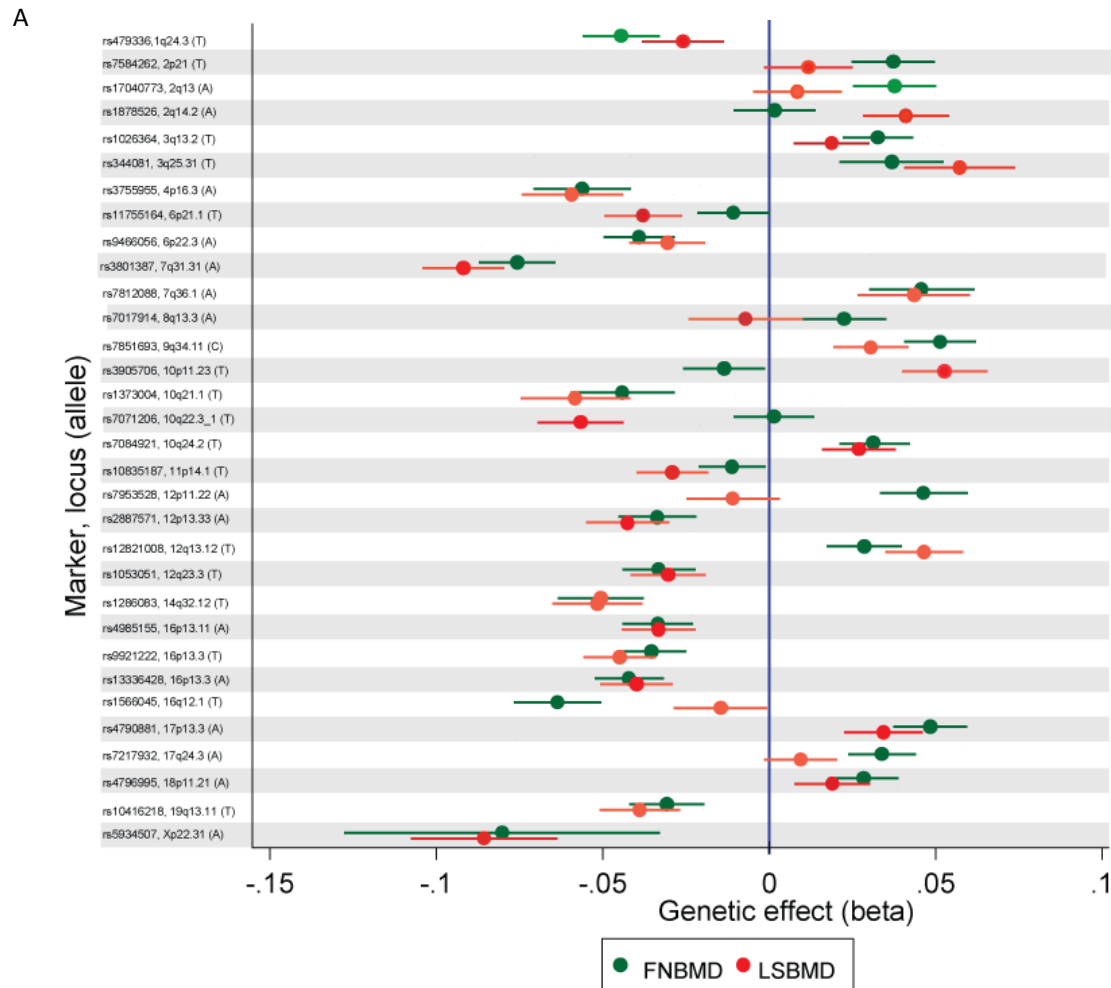

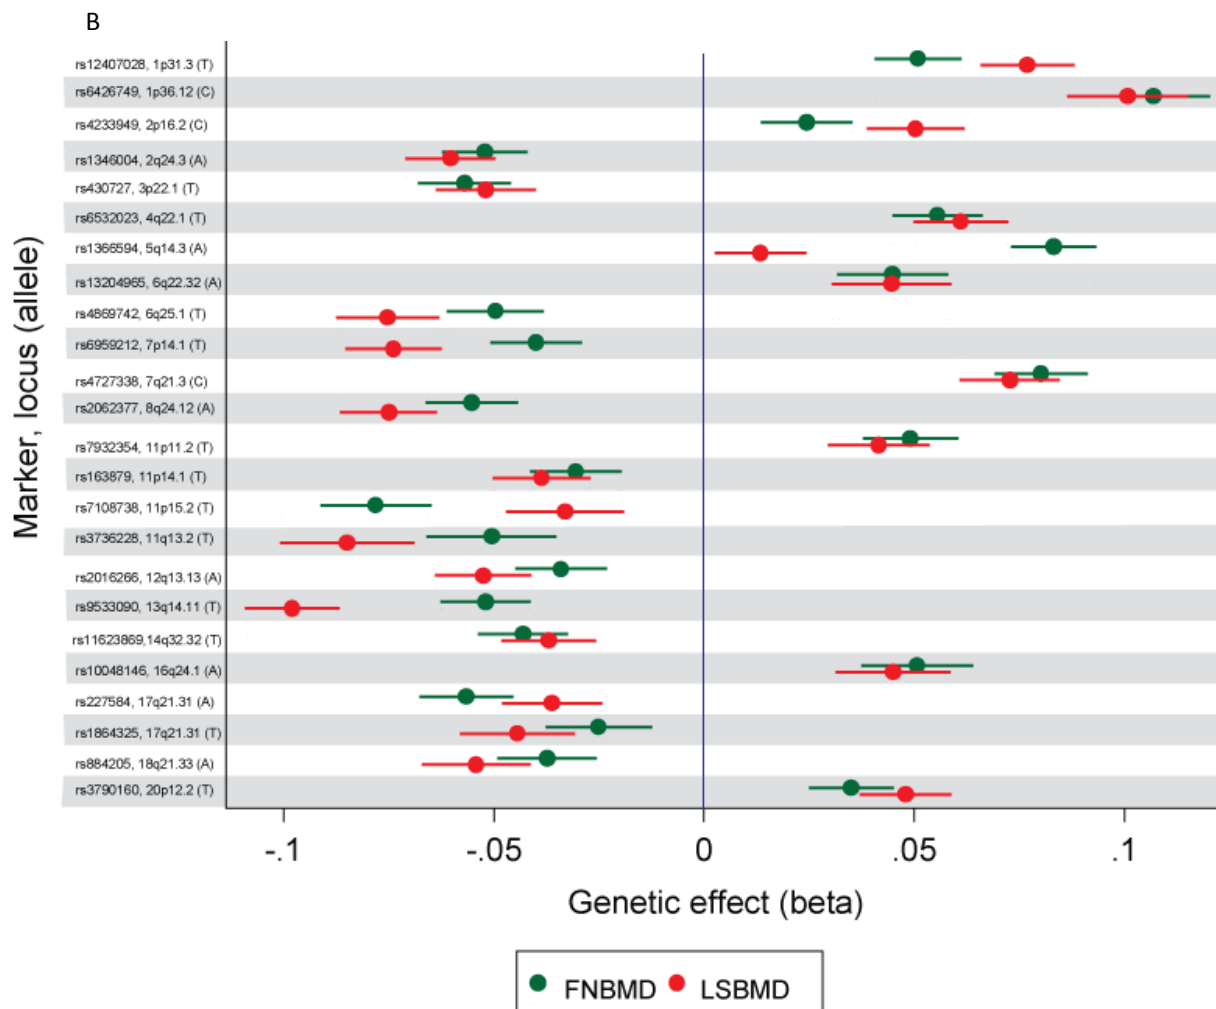



**Supplementary Figure 7.** Forest plots for each one of the BMD loci associated with fracture risk (rs7851693, rs227584, rs163879, rs6959212, rs430727, rs1286083, rs4233949, rs6532023, rs3801387, rs4792909, rs6426749, rs4727338, rs3736228, rs7521902, rs1373004, rs4796995) and those loci that are part of the OPG/RANK/RANKL pathway (rs2062377, rs884205, rs9533090). Studies are grouped by ethnic group. Imputed markers are colored in green. The imputation quality score is displayed for imputed markers at the right column.

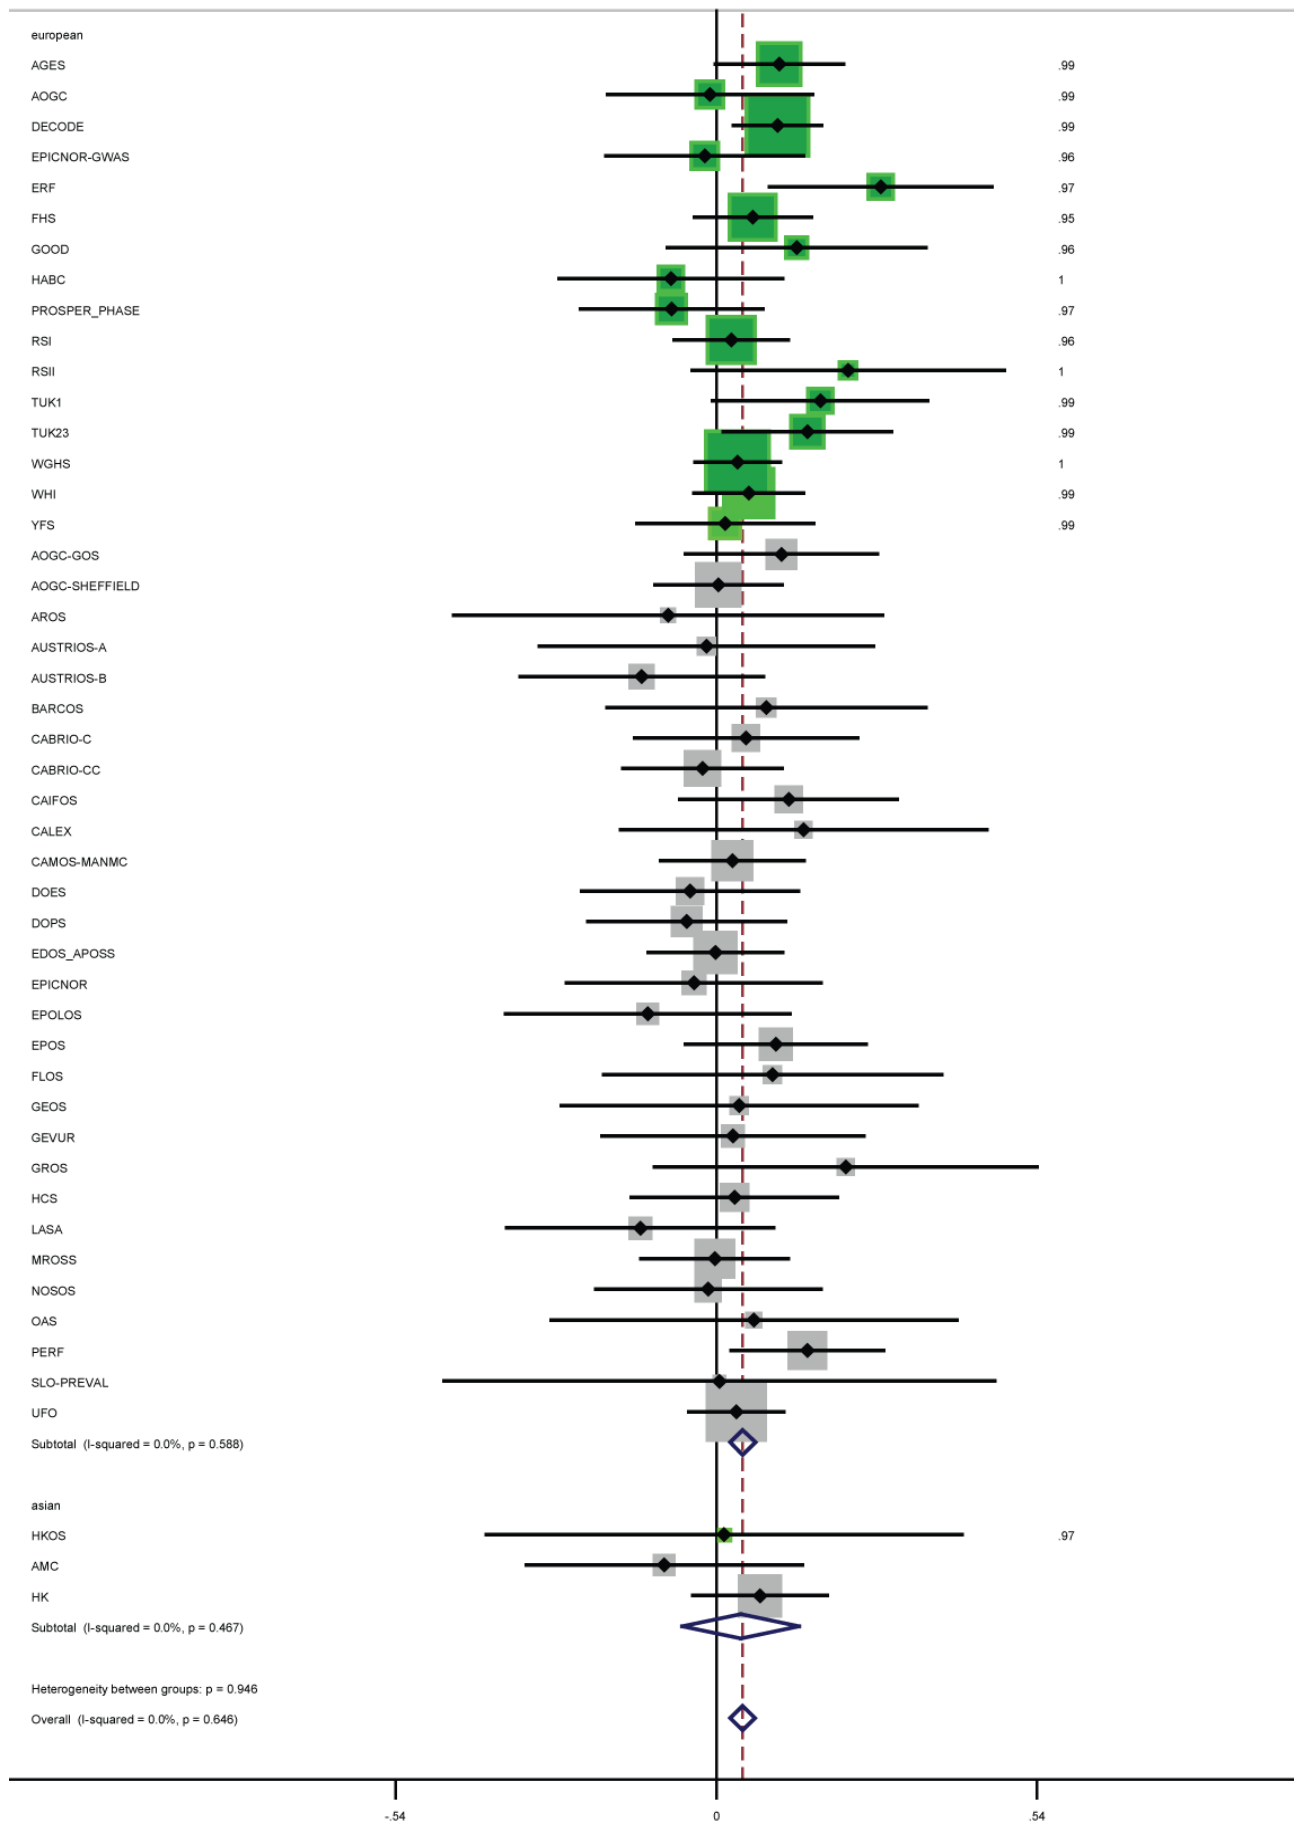

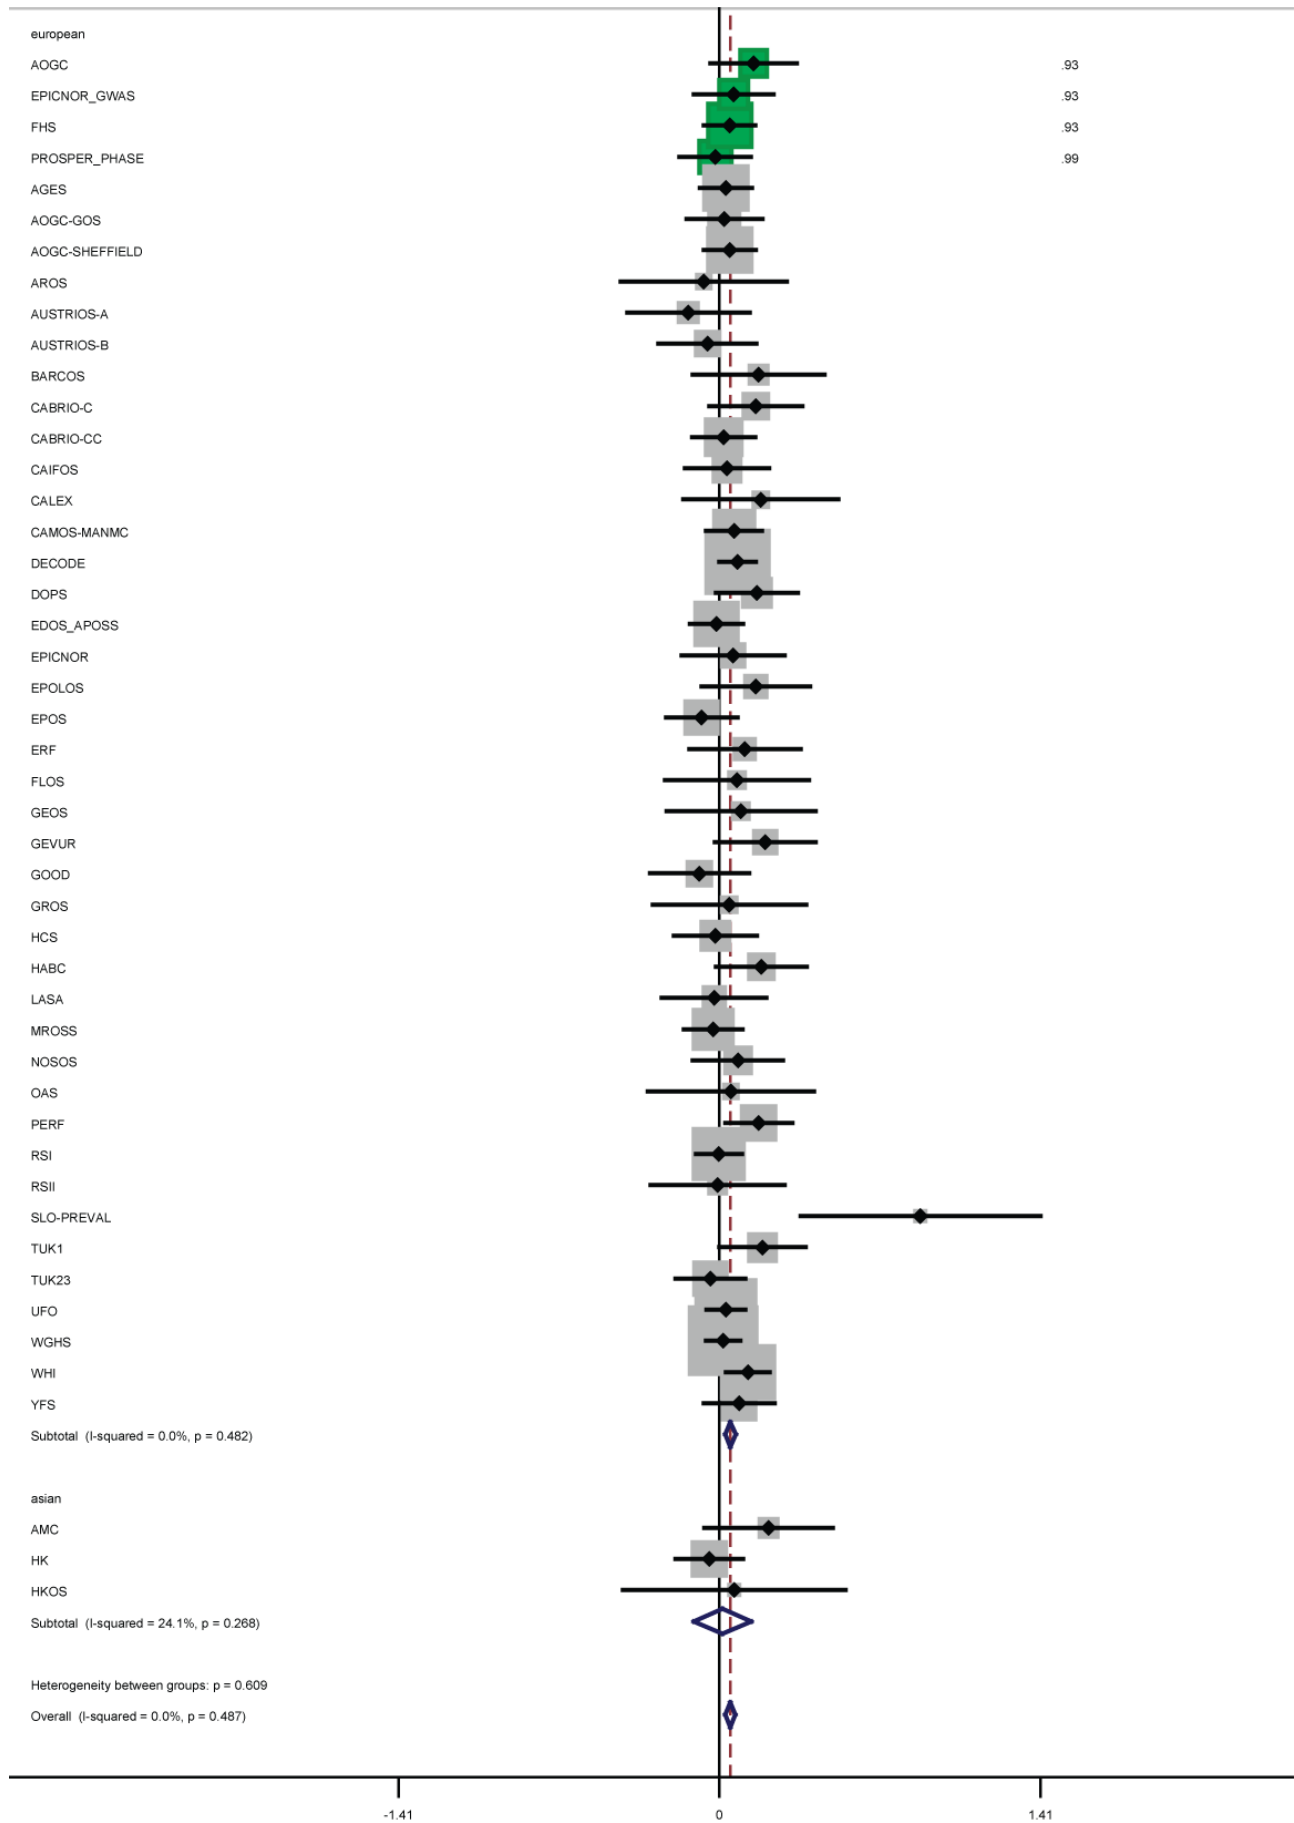

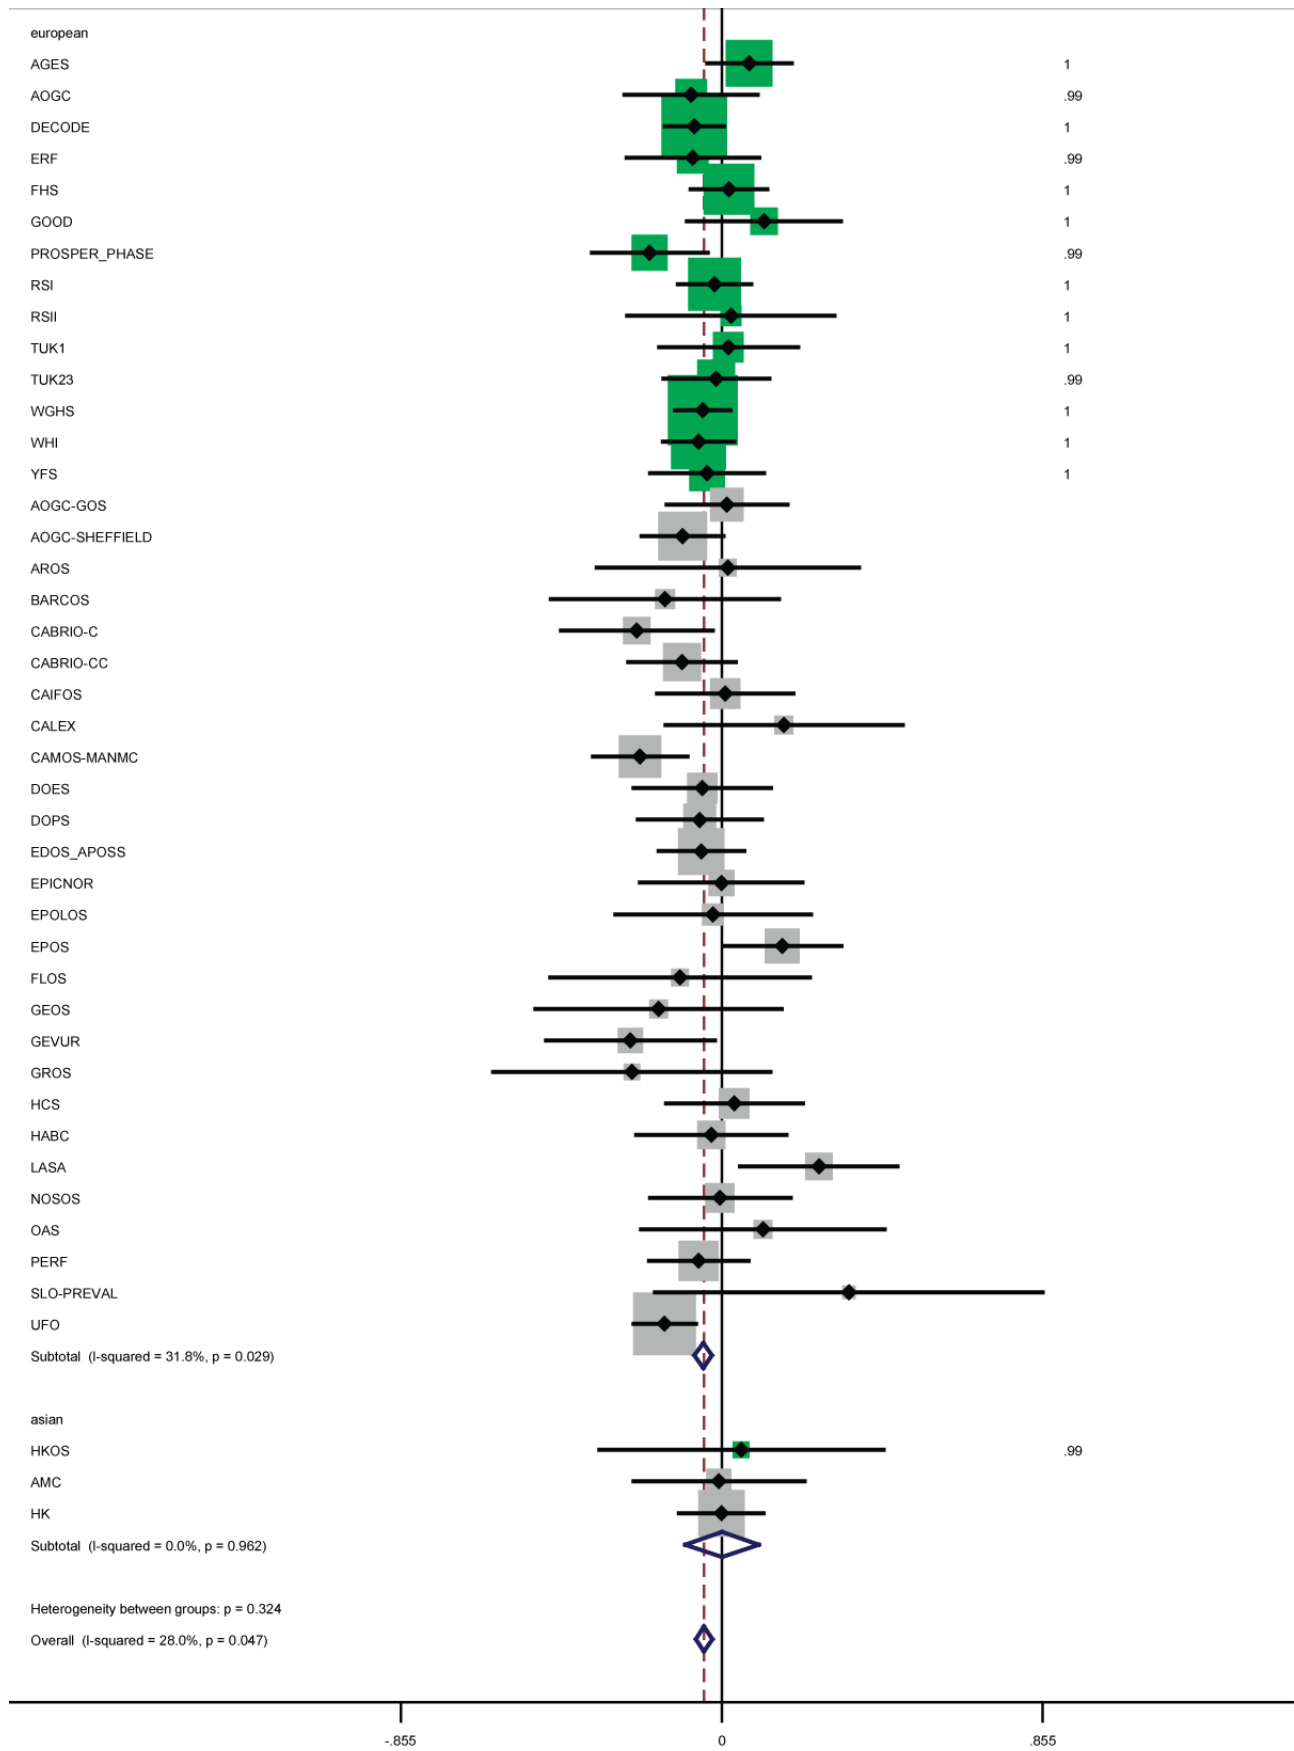

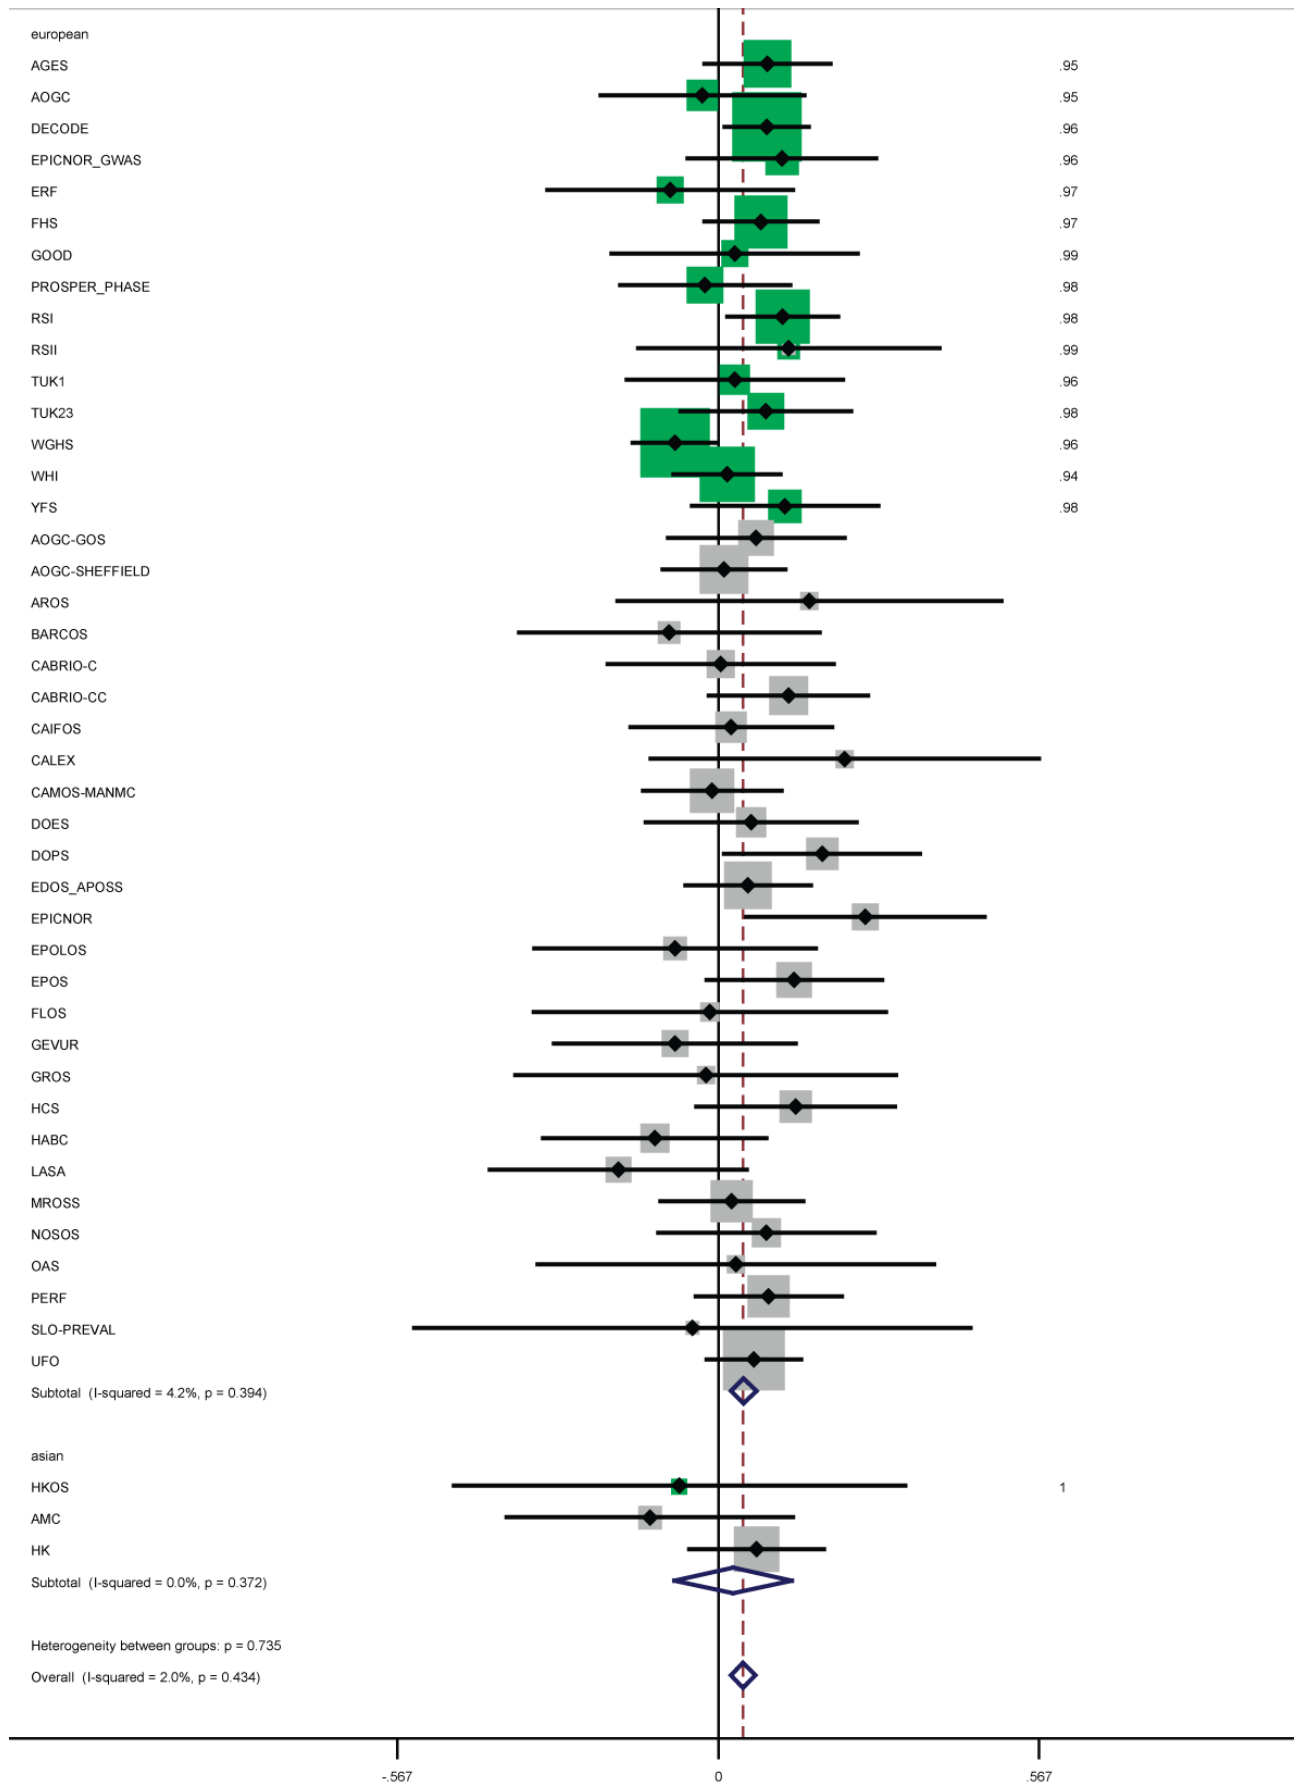

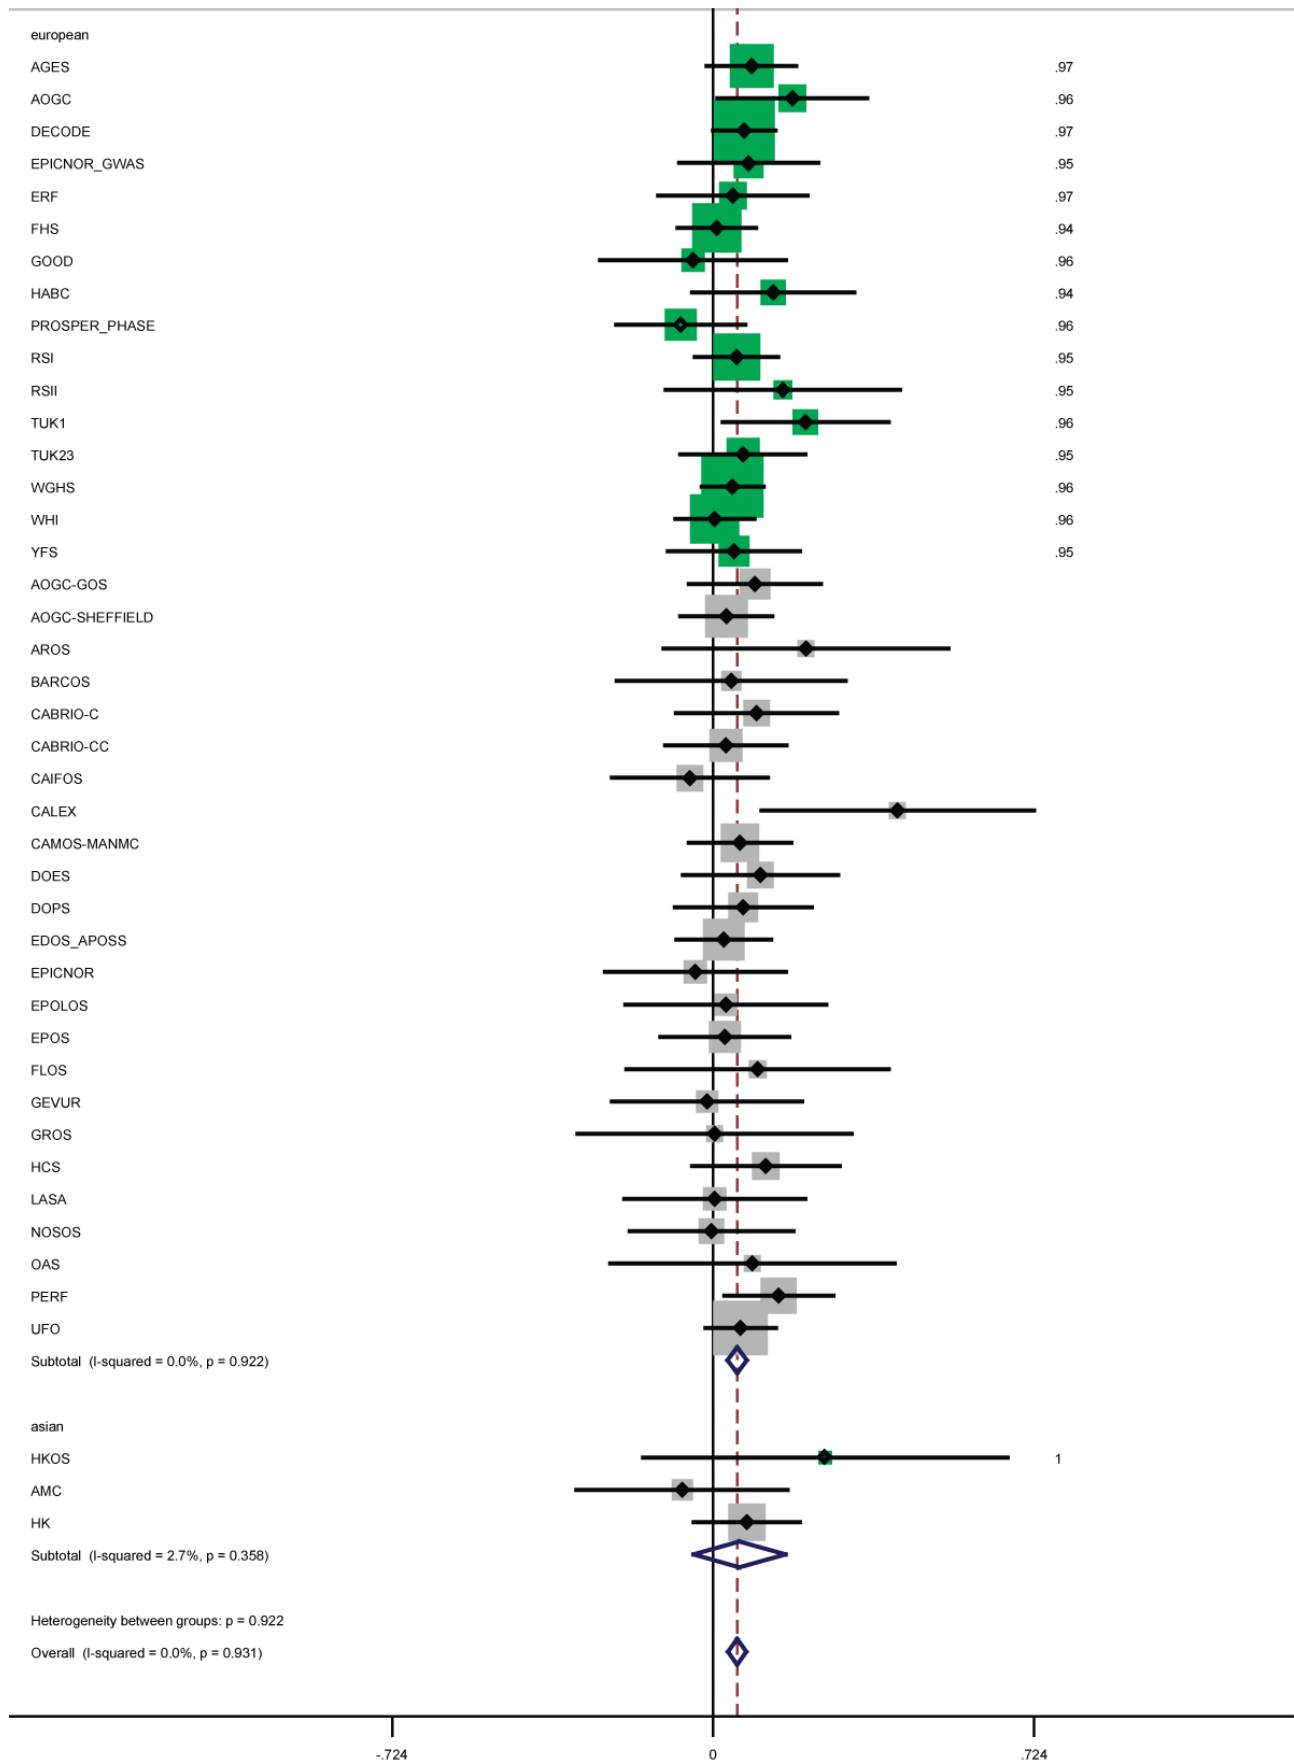

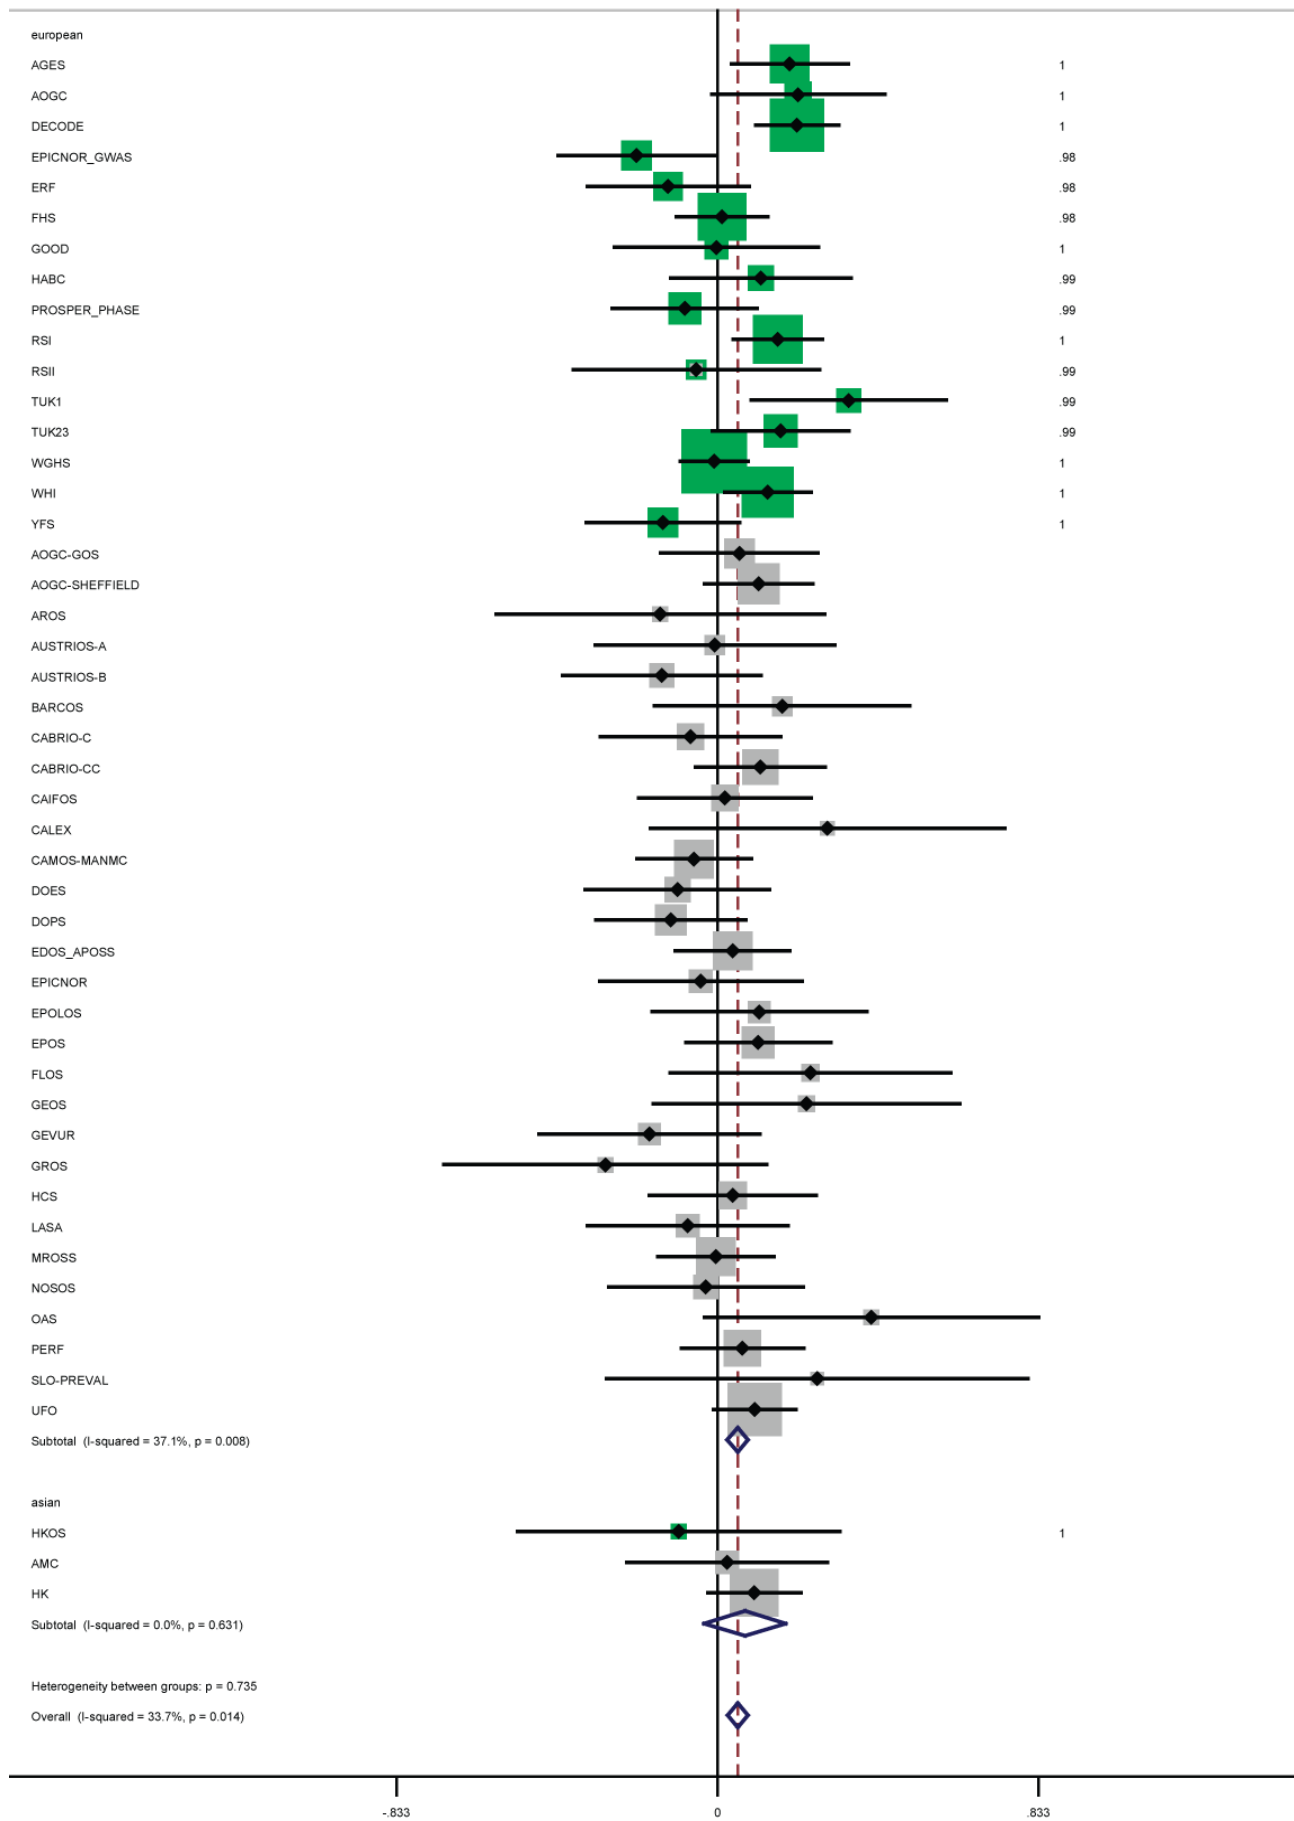

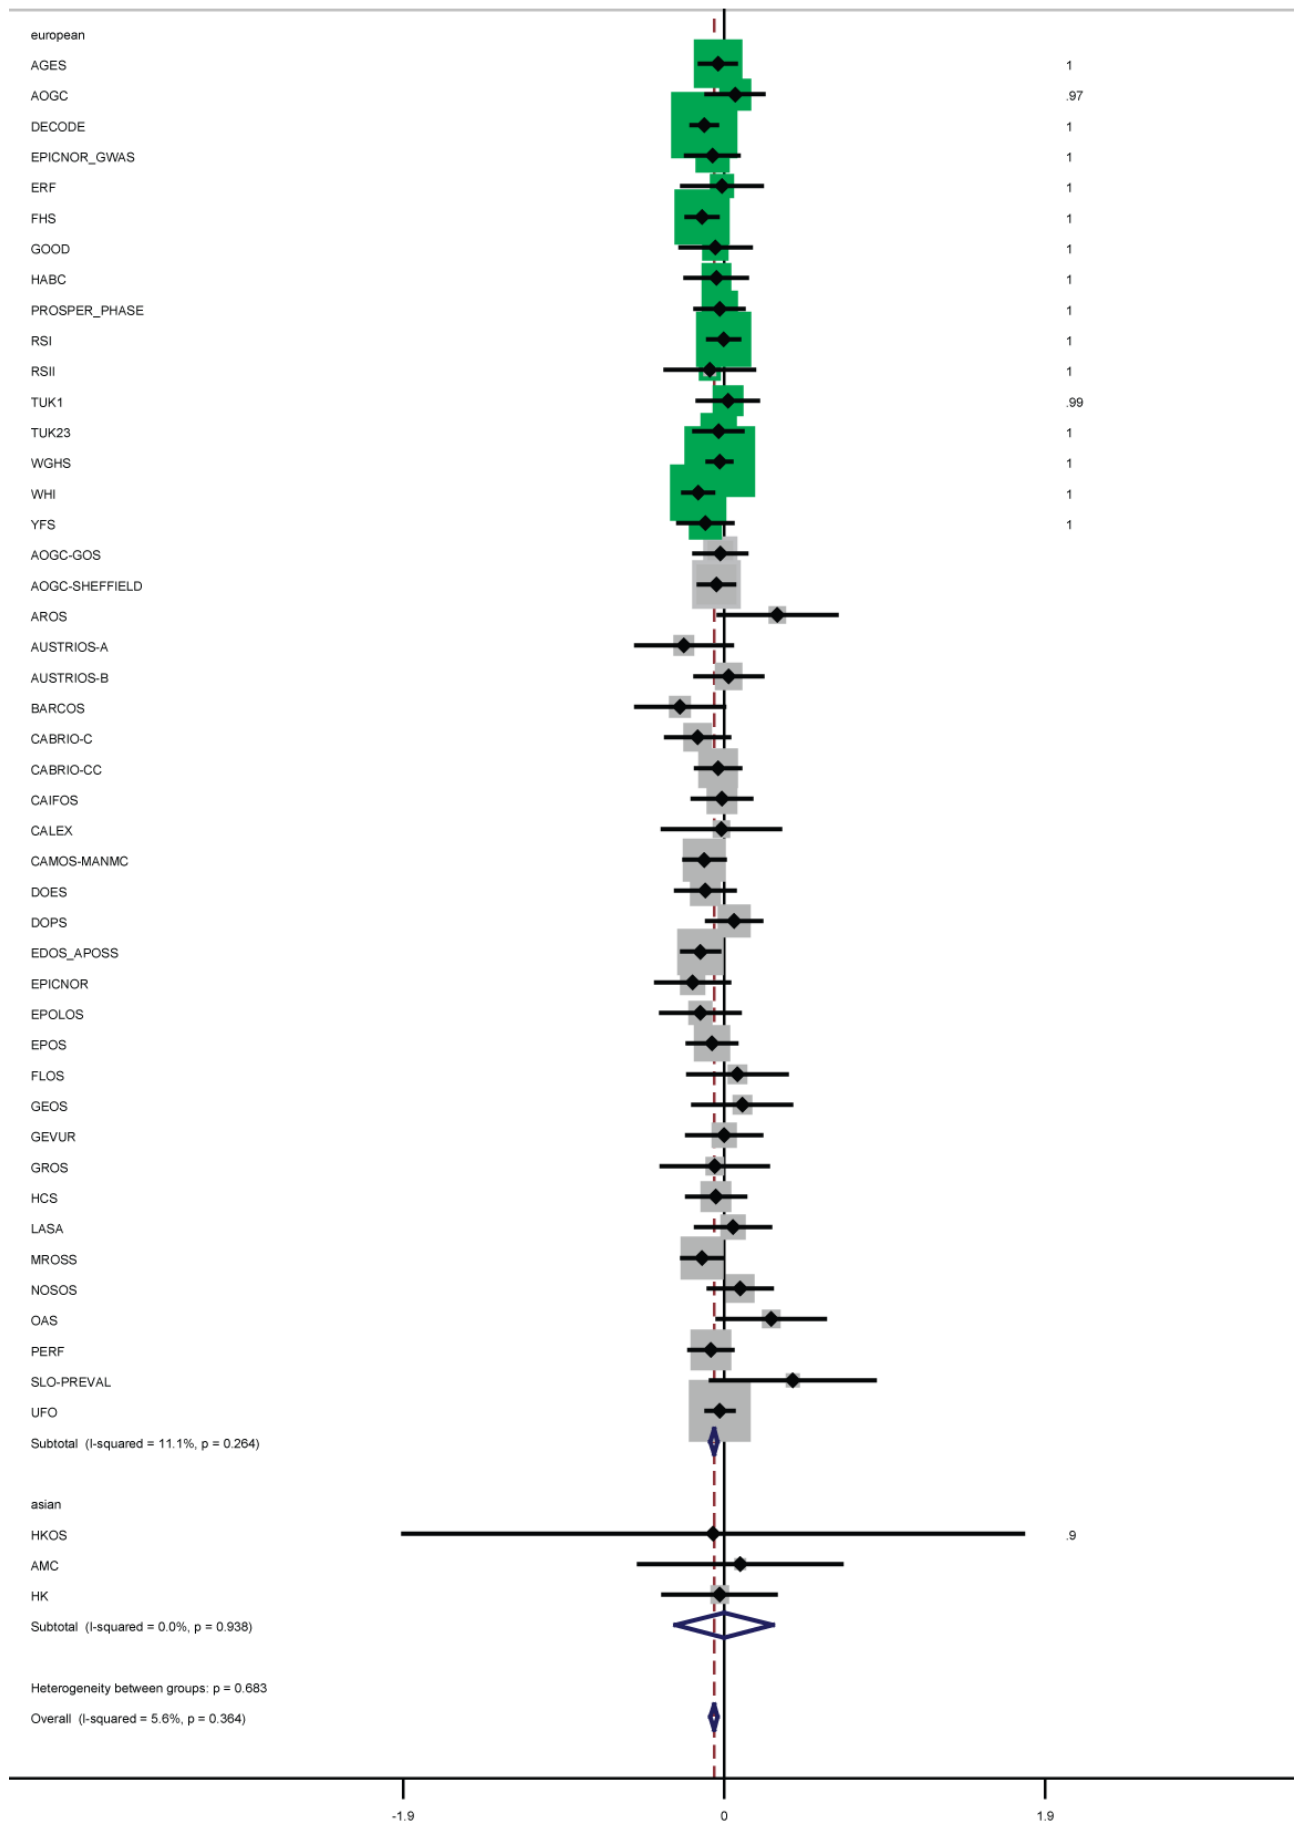



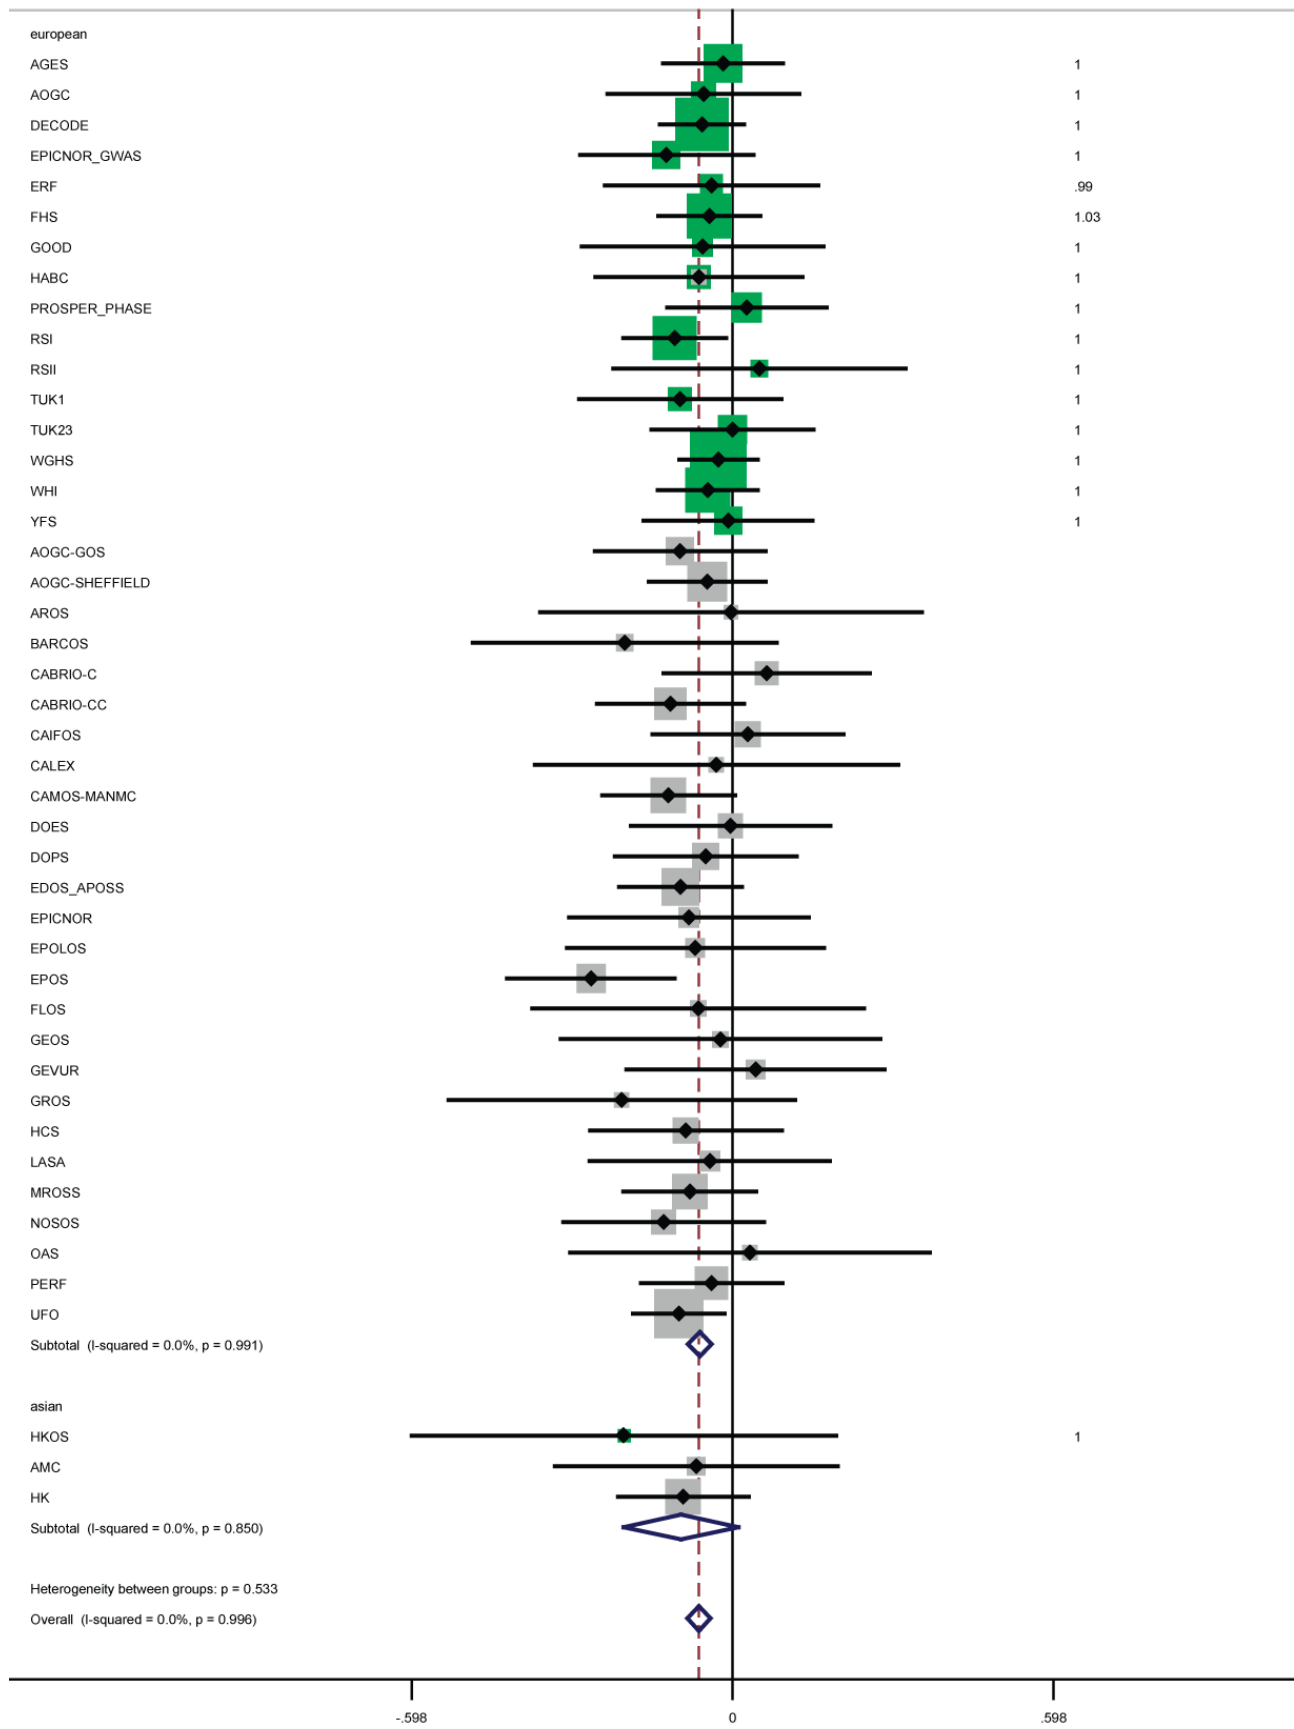

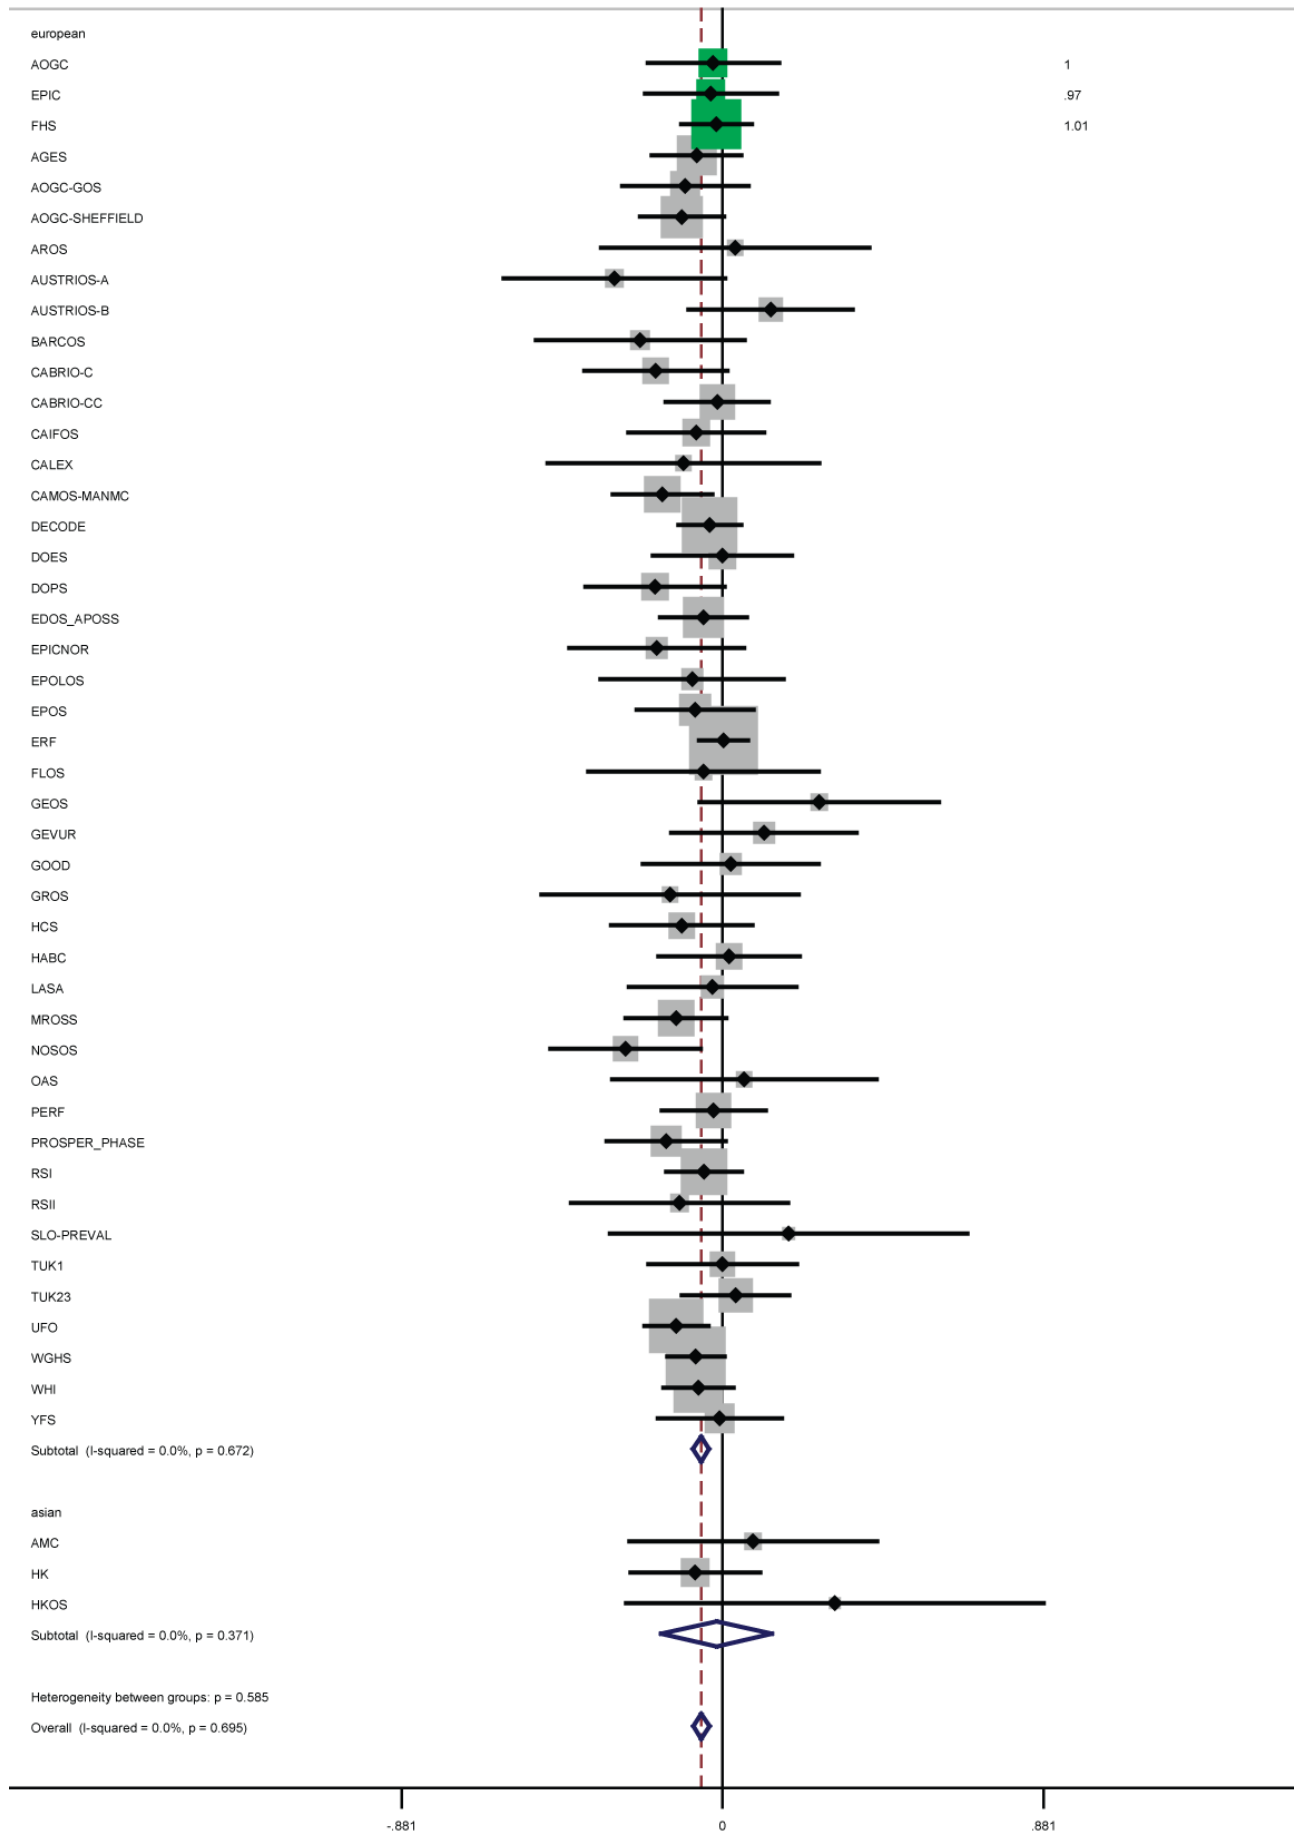

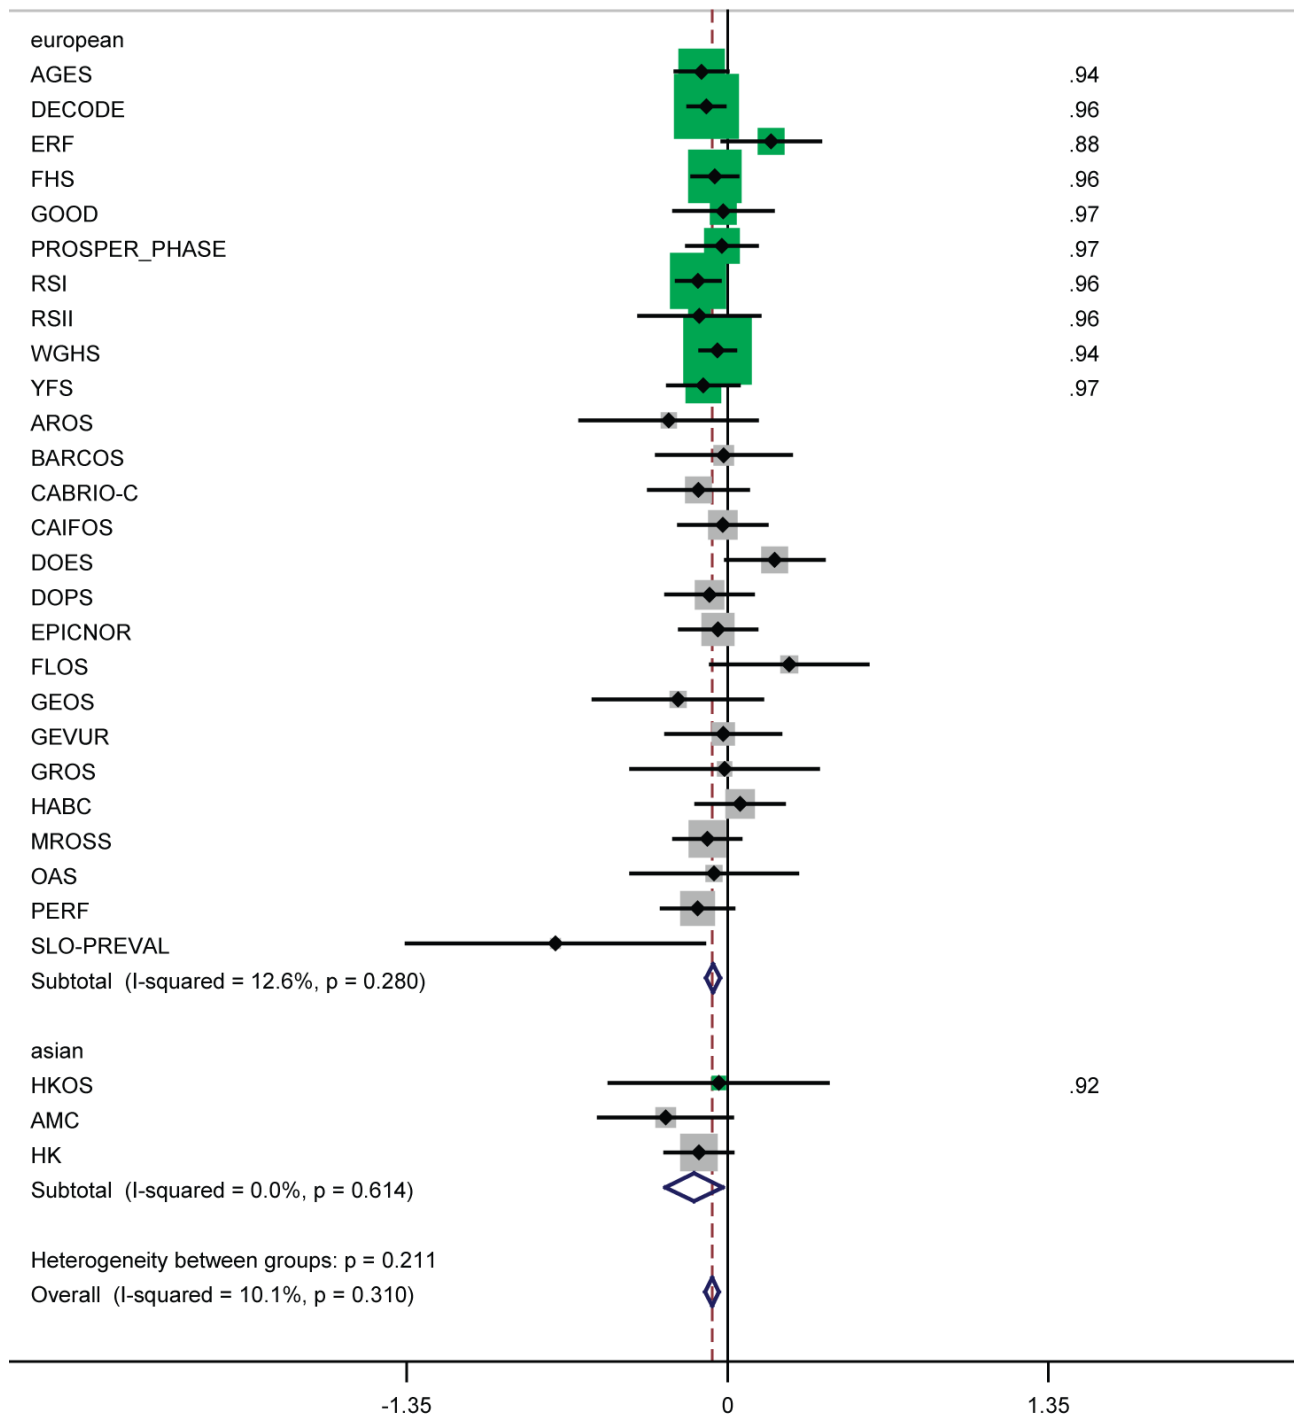

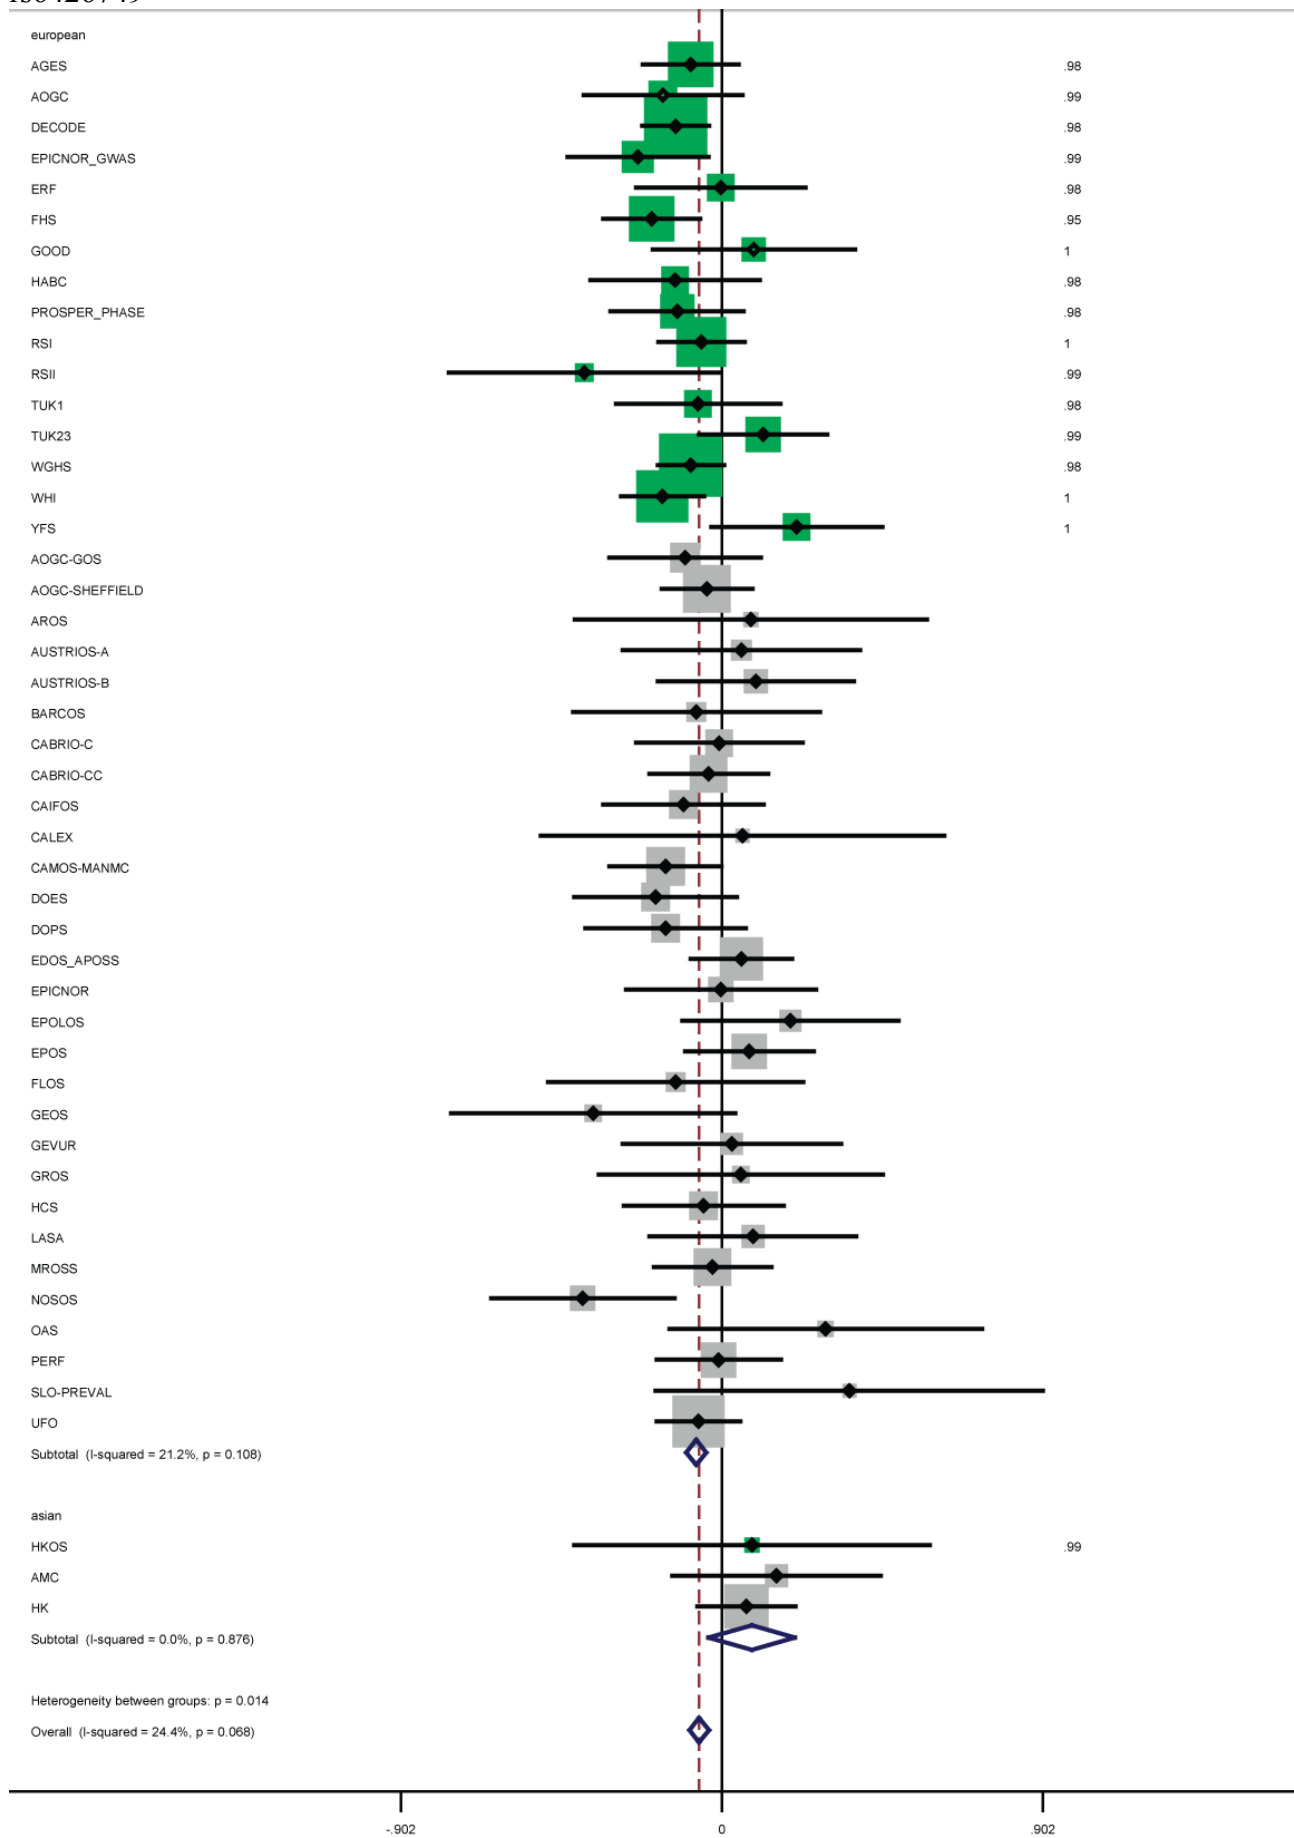

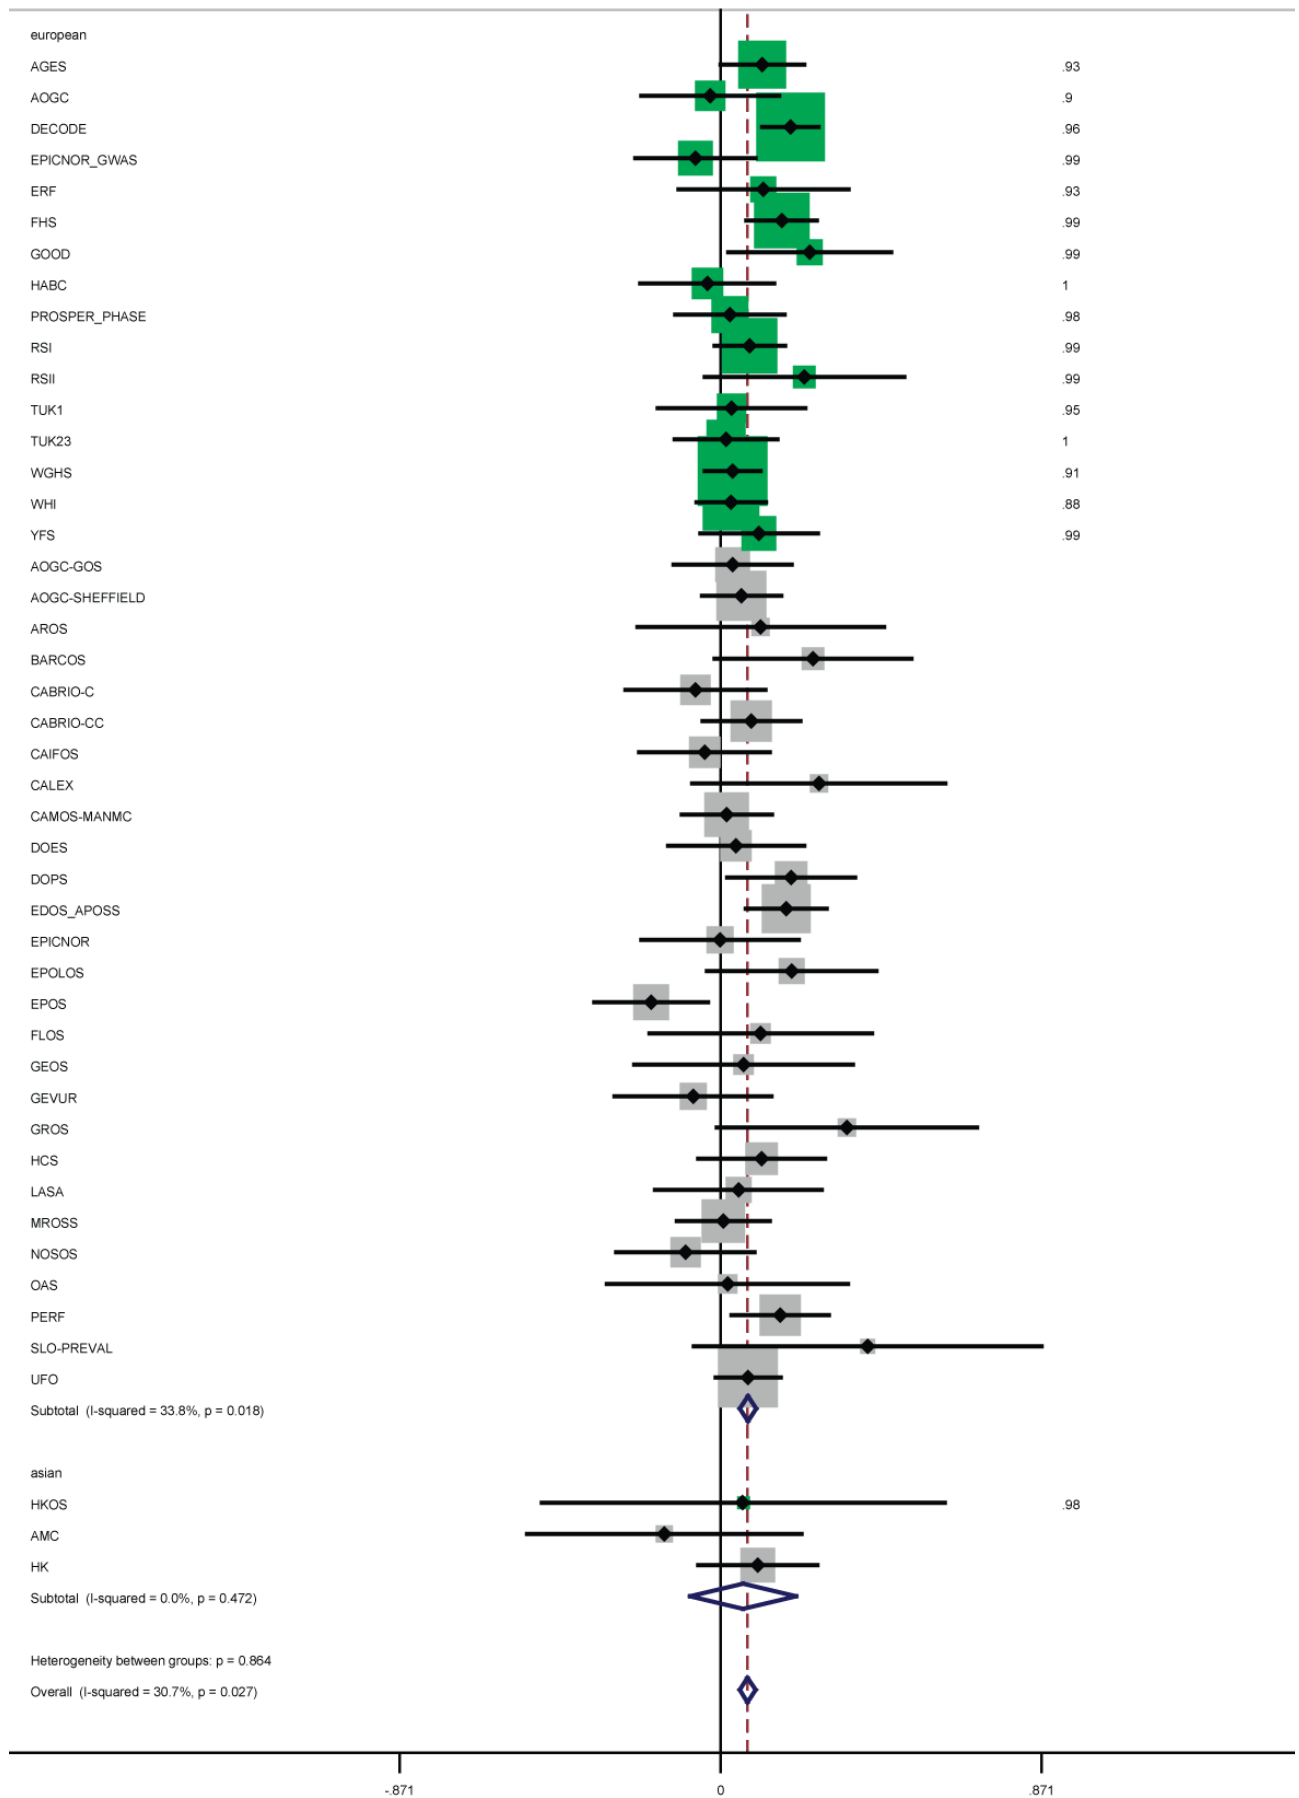

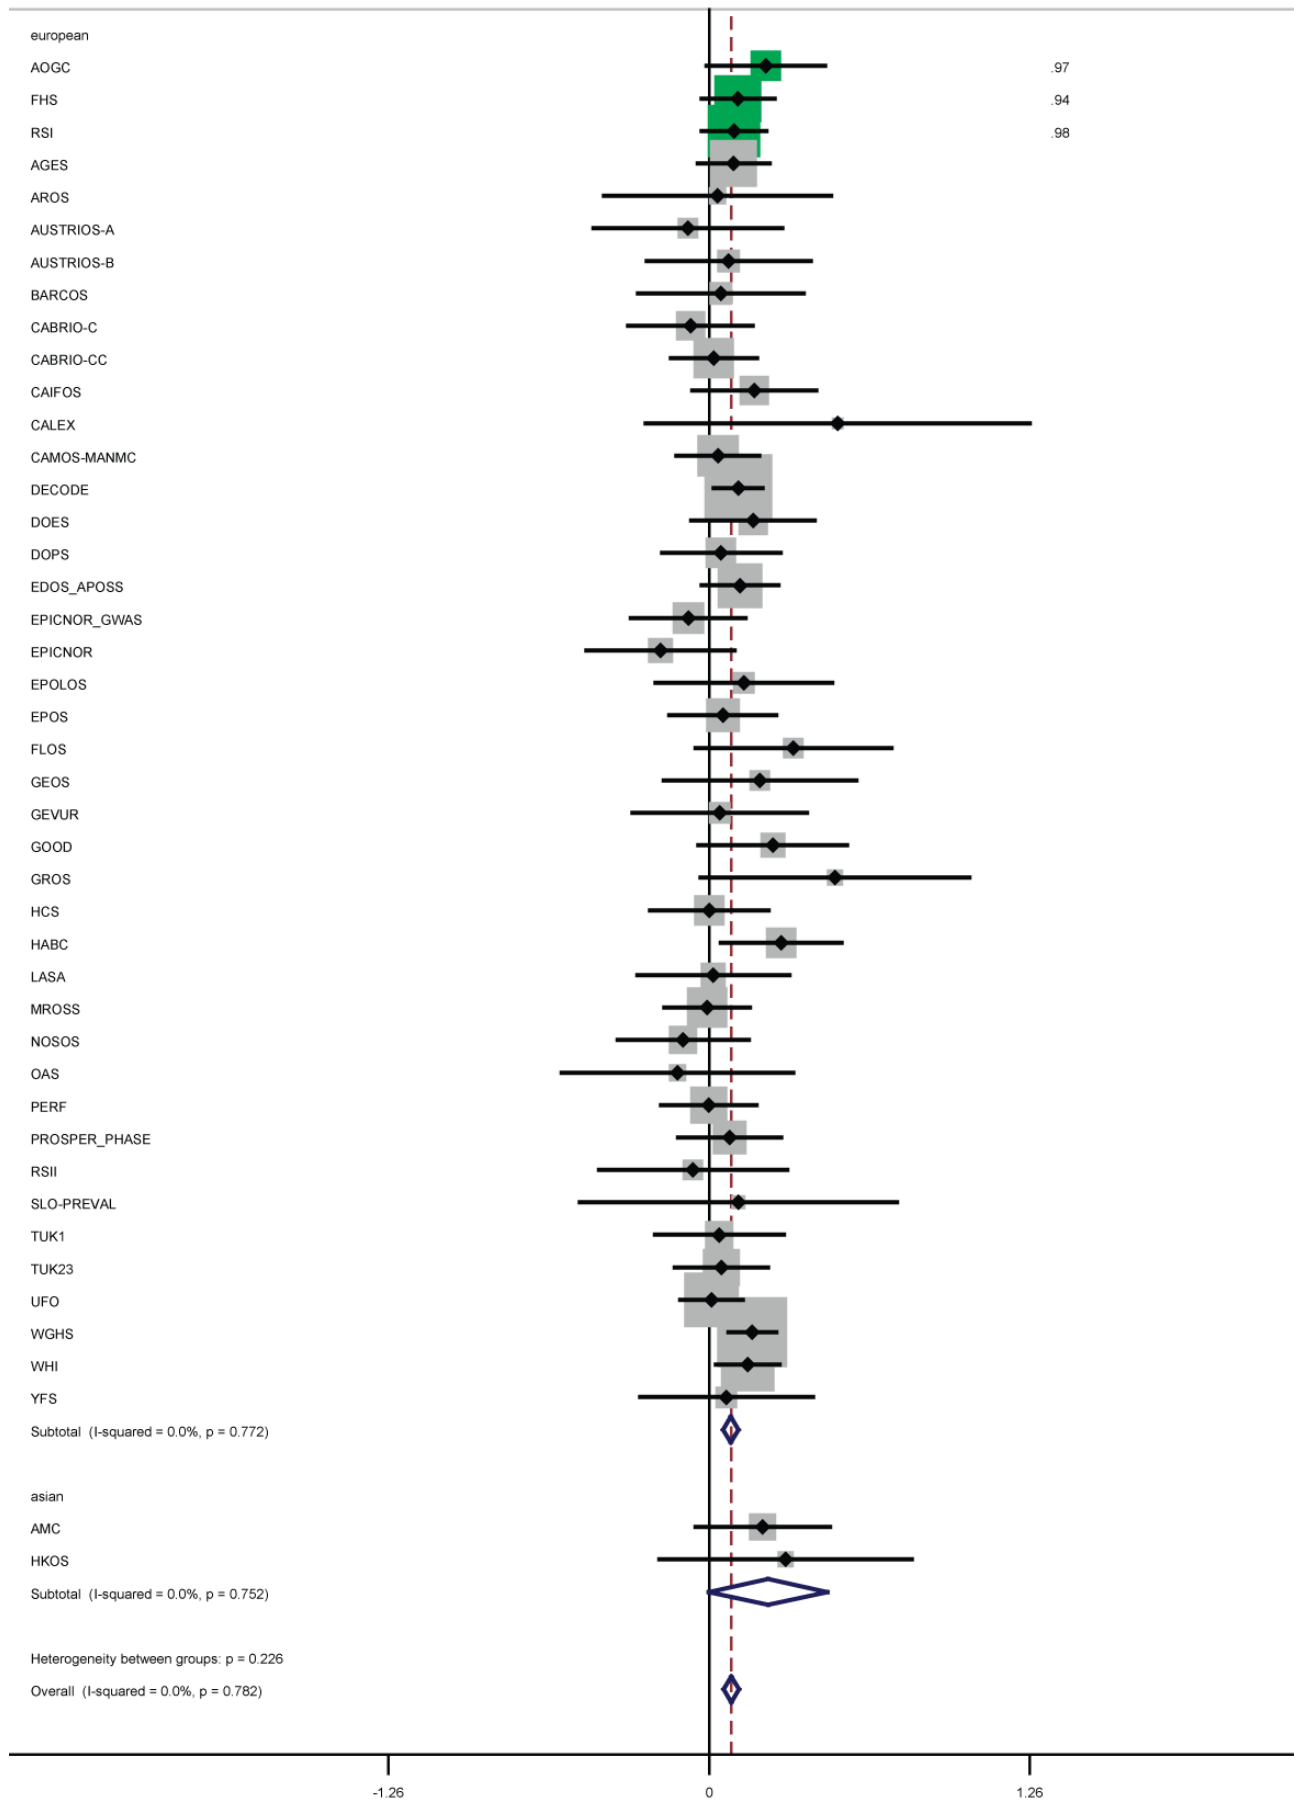

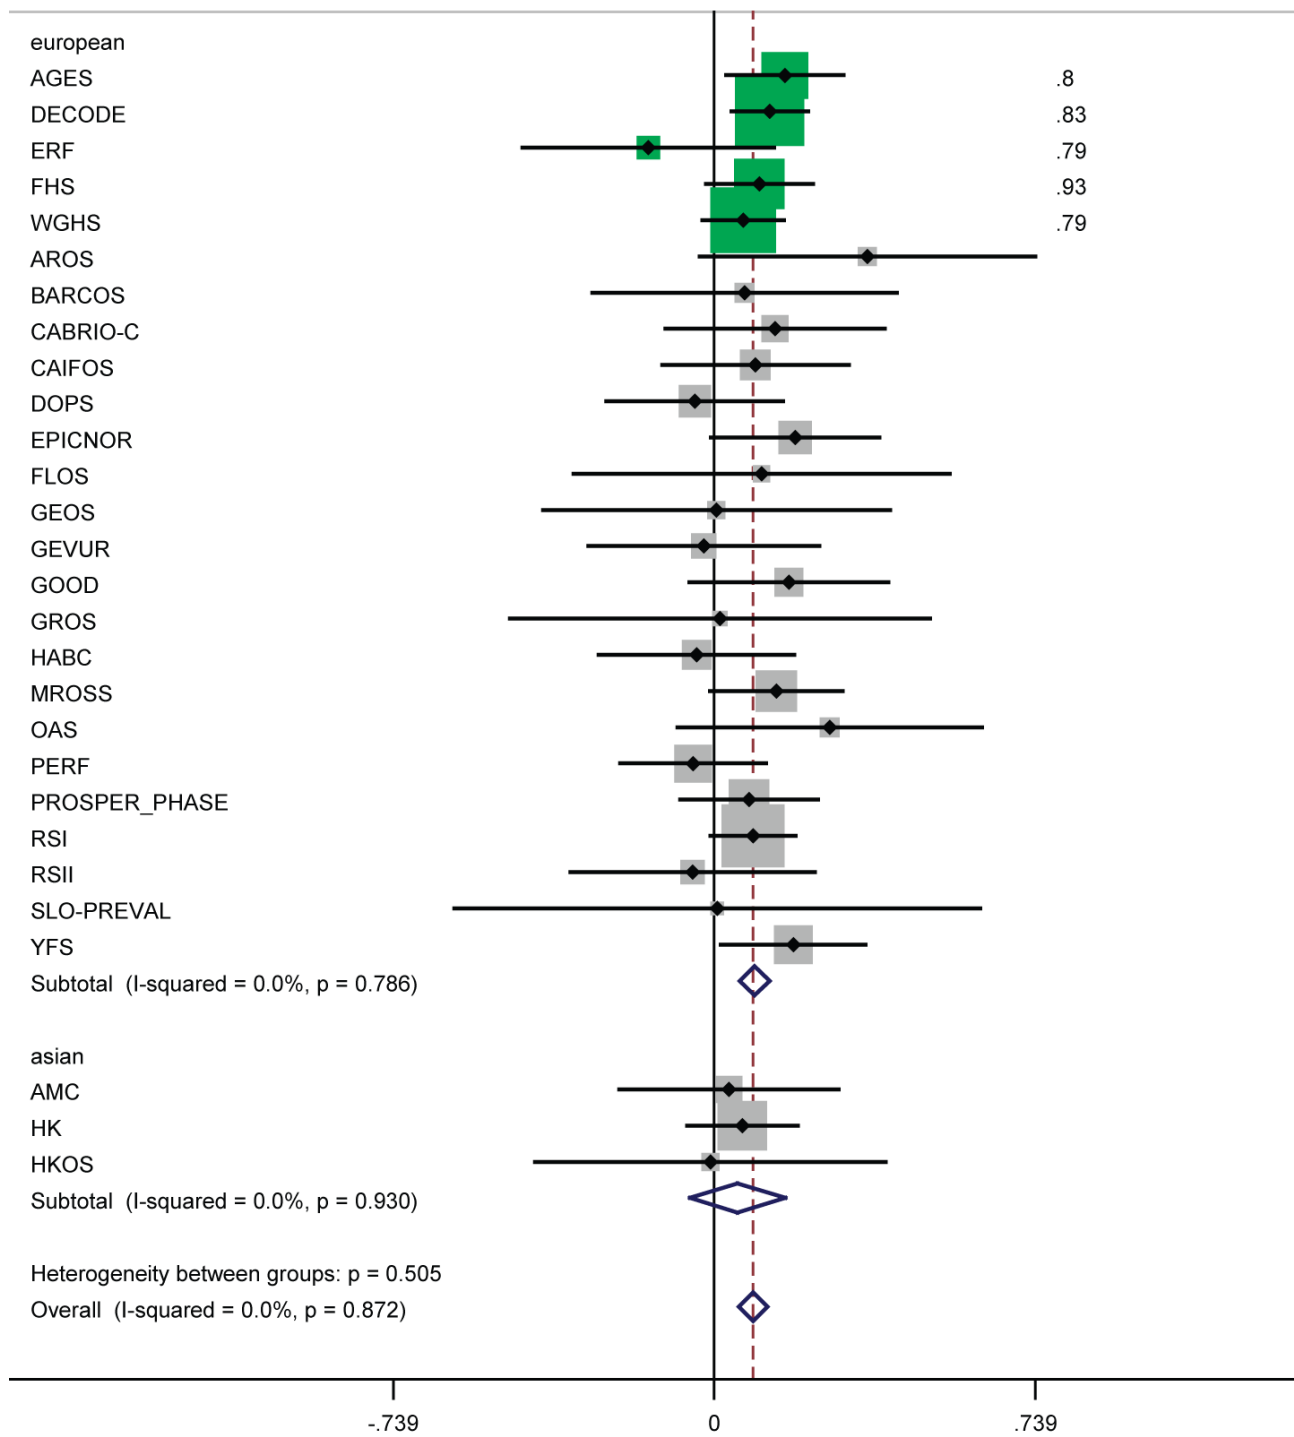

rs1373004

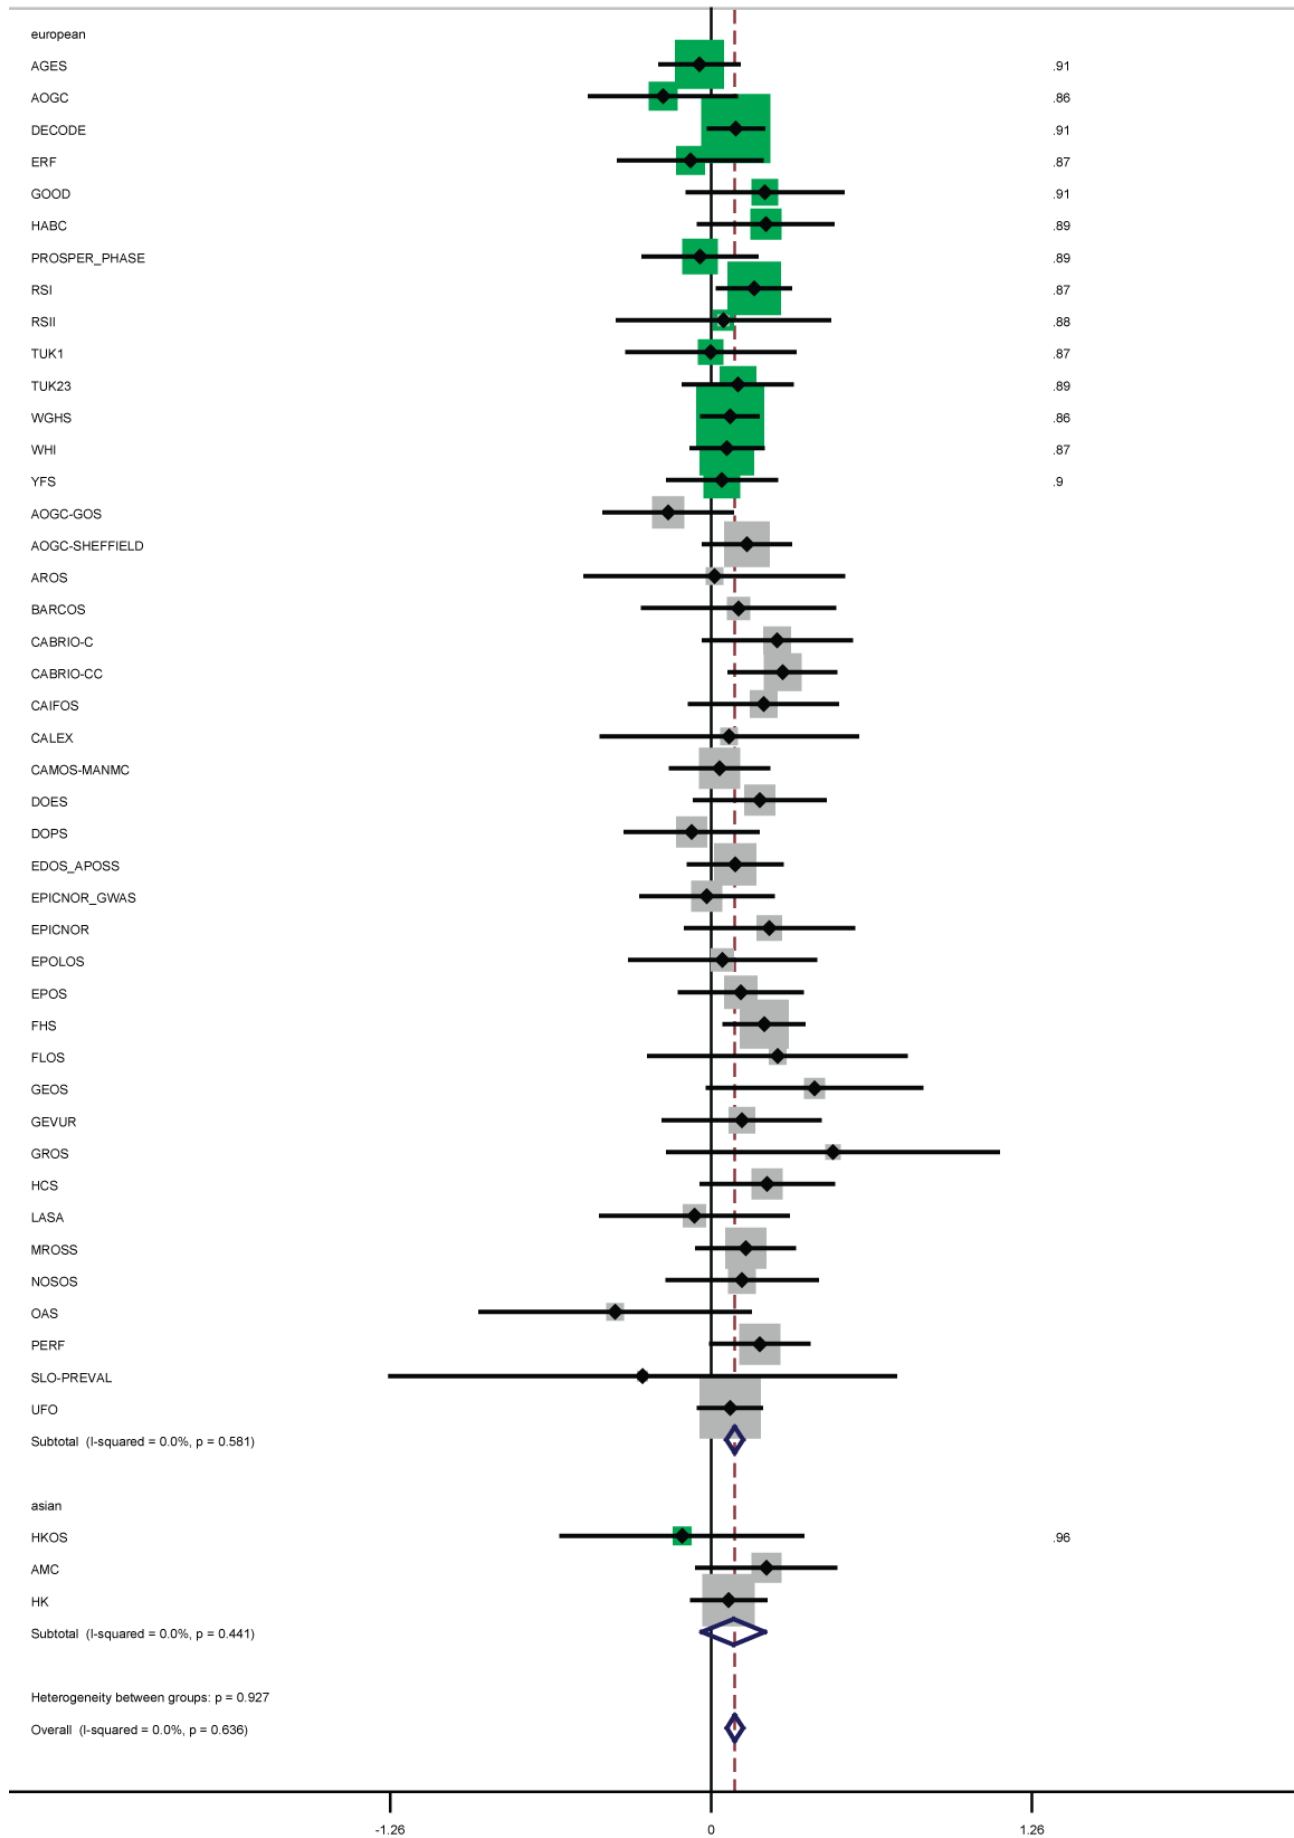



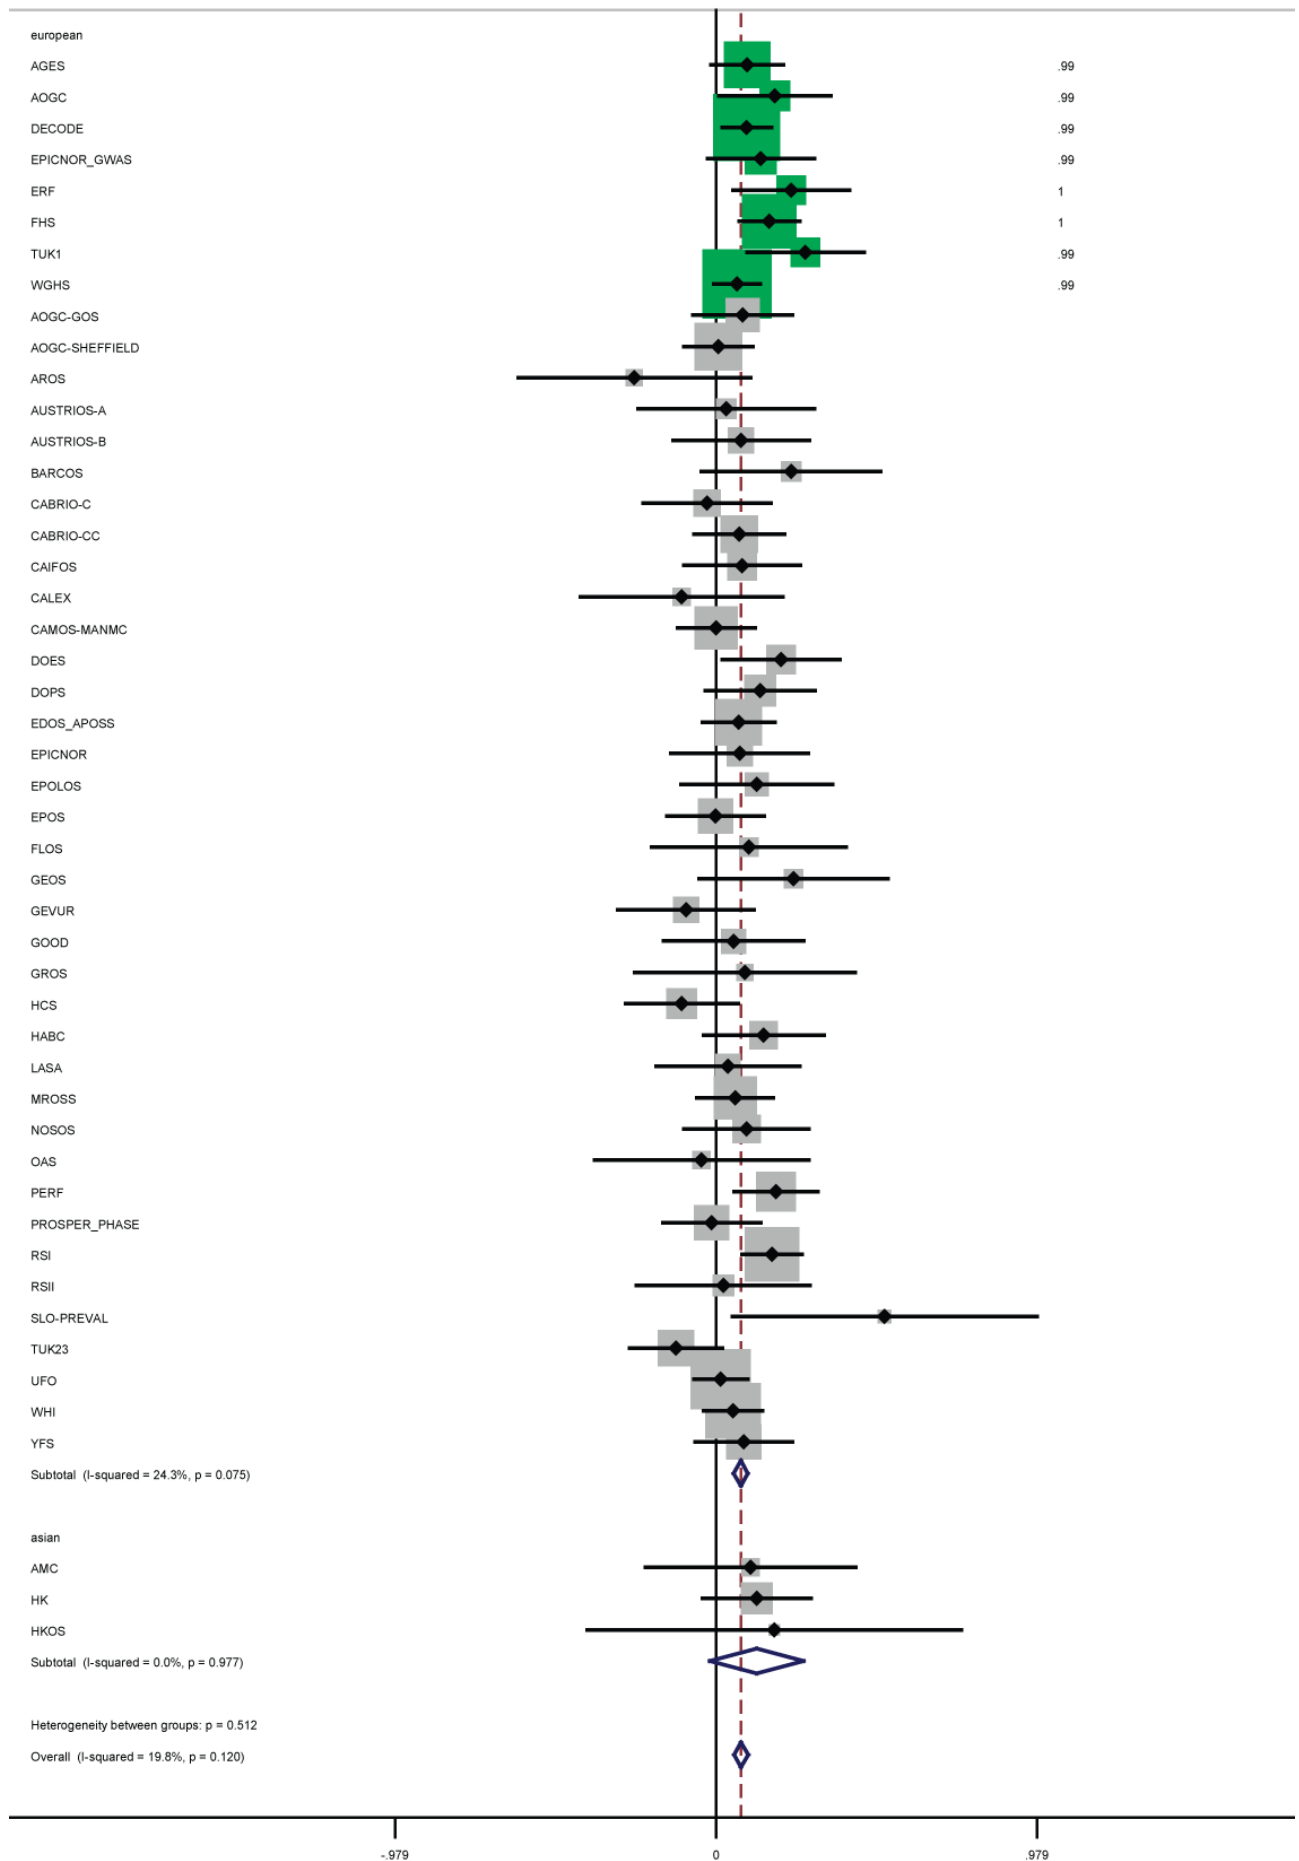

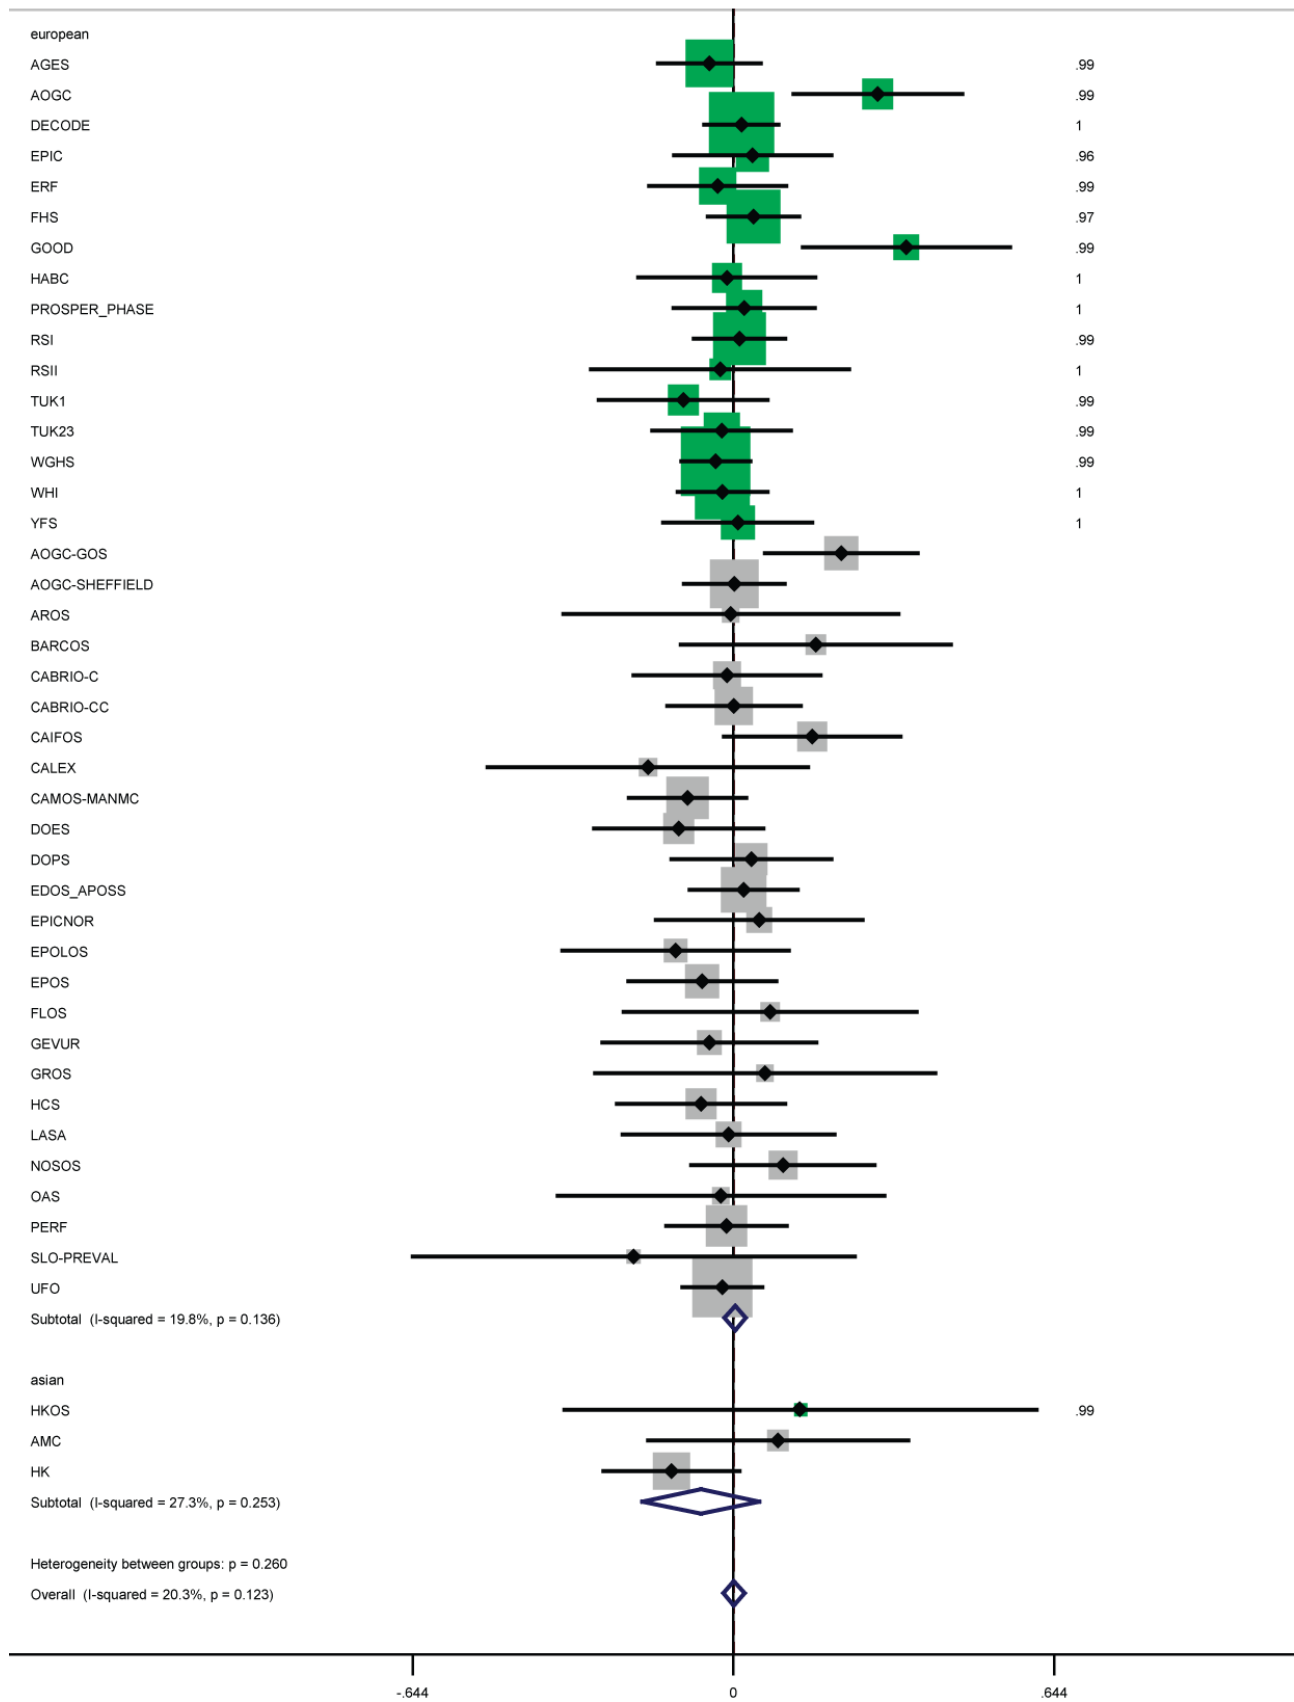

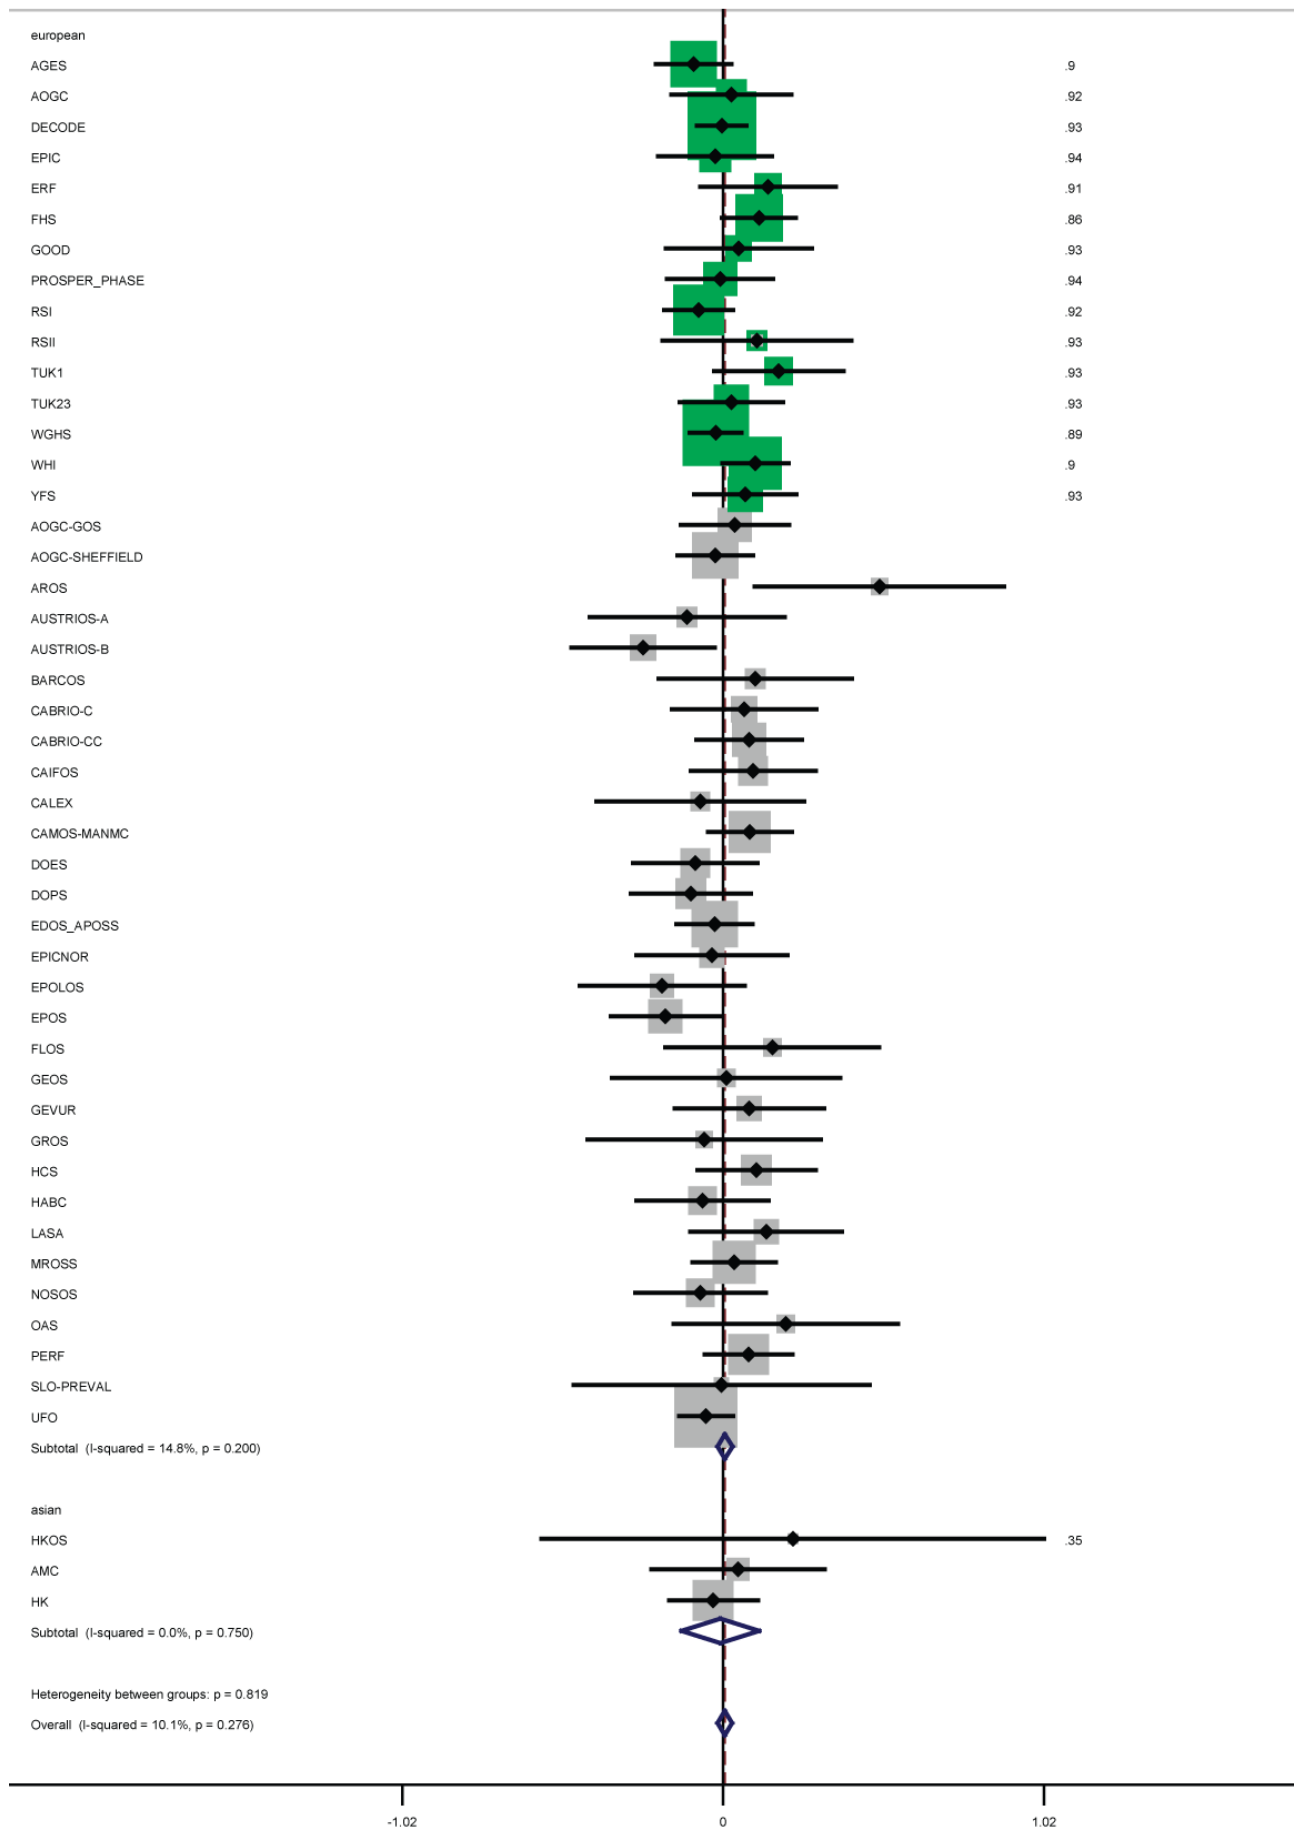

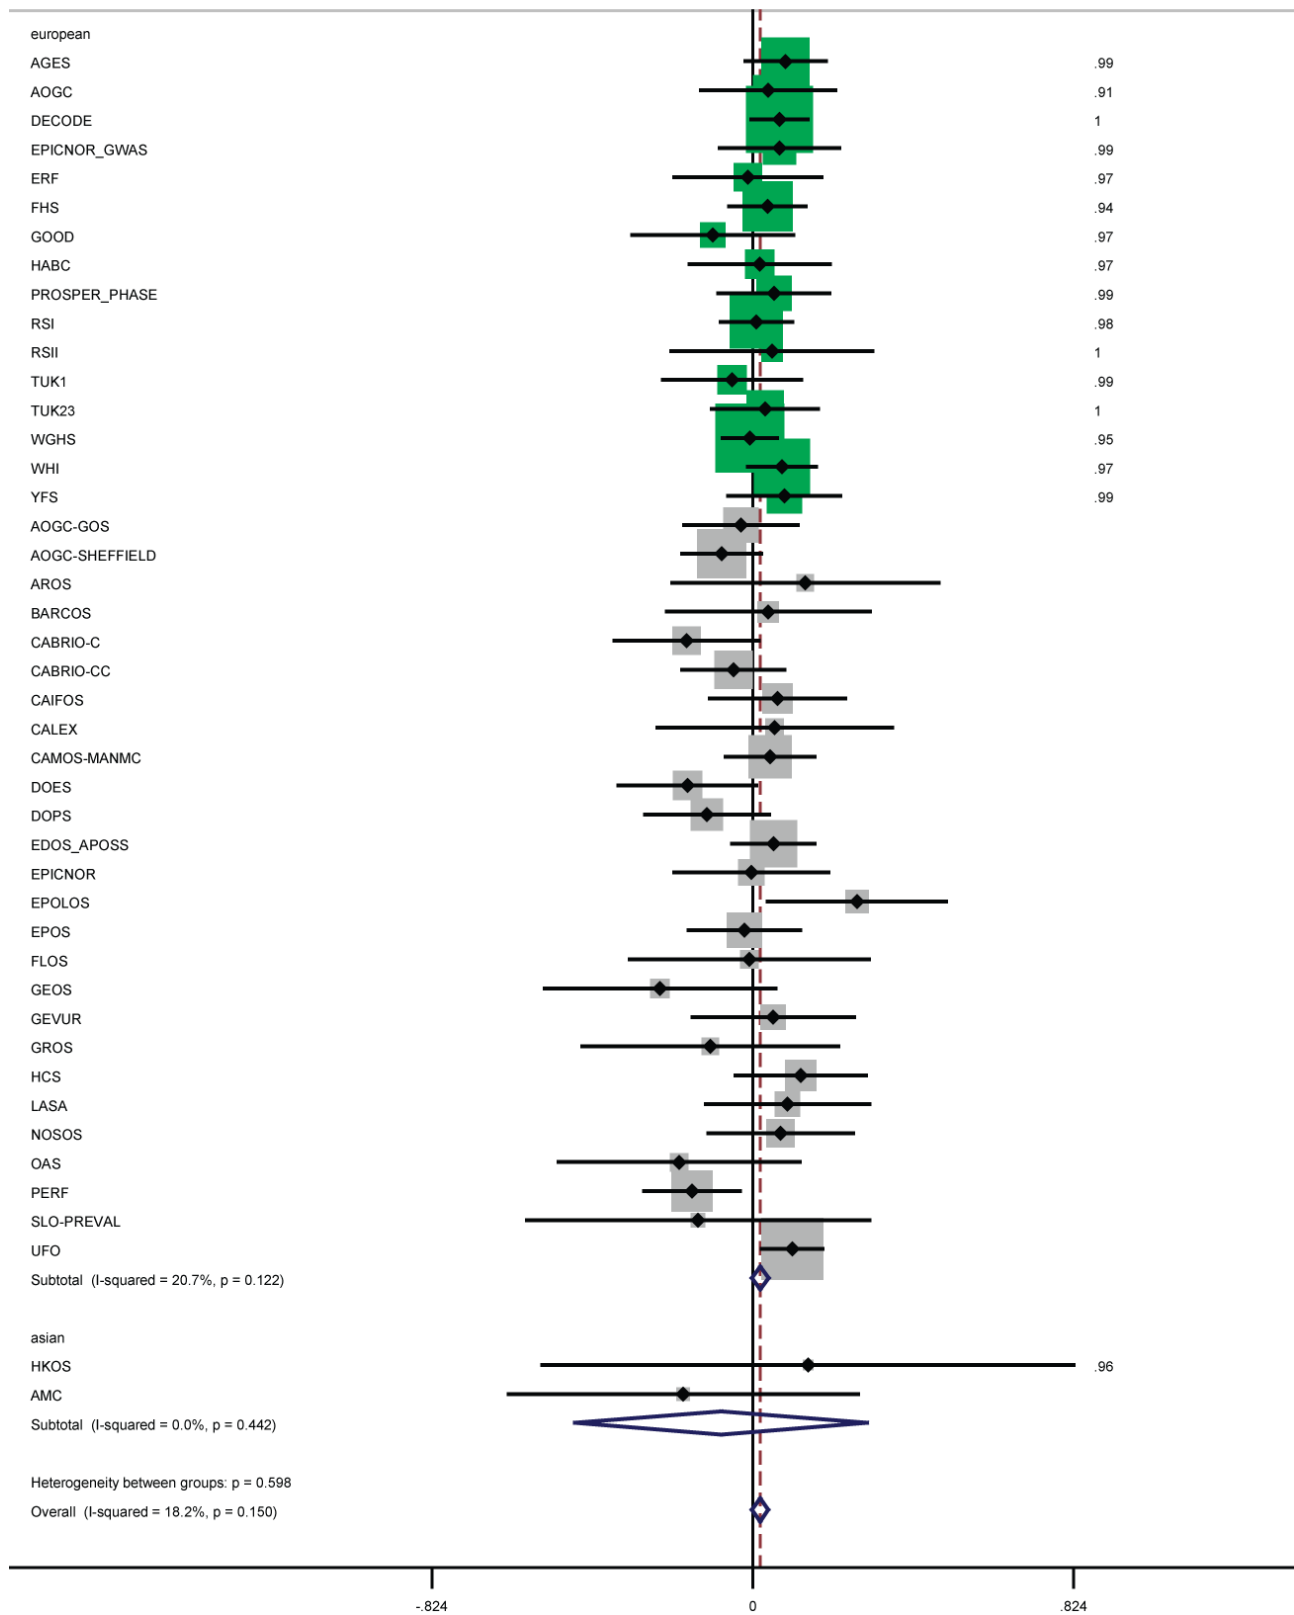

**Supplementary Figure 8.** The area under the Receiver-operator characteristics (ROC) curves (AUC) of two different models predicting the risk of osteoporosis (T-score  $\leq -2.5$ ) in the 2,836 genotyped women of the PERF study. Model 1, represented by the solid black line, includes only the genetic score (AUC = 0.59 [0.56- 0.61]). Model 2, represented by the dashed red line, includes age, weight, (AUC= 0.75 [0.73 -0.77]).

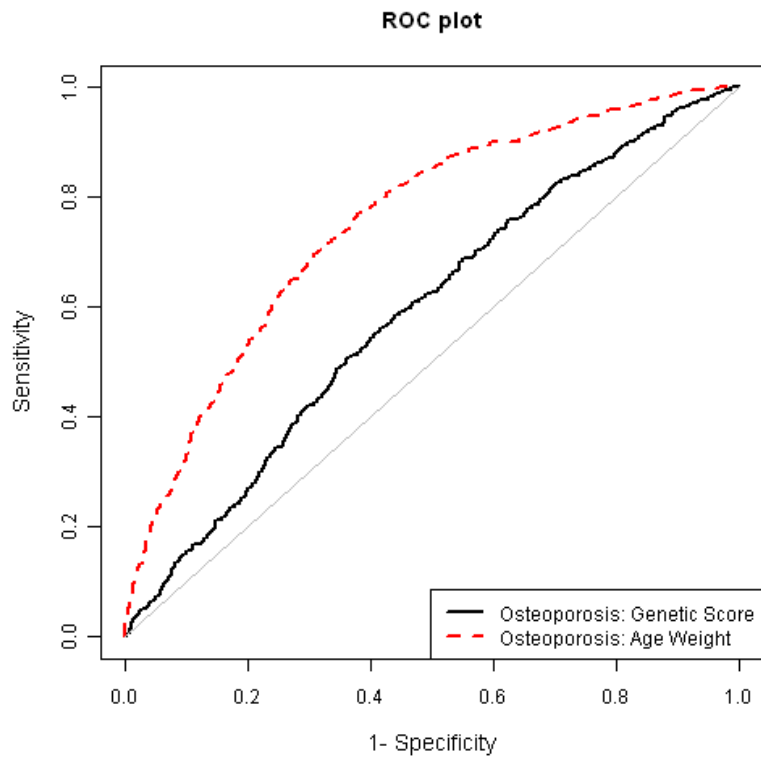

**Supplementary Figure 9.** Two thousand sets of 55 randomly selected SNPs evaluated in GRAIL. Black arrow points to the number of significant loci identified by GRAIL using the 55 GWS BMD loci. None of the 2,000 sets had more than 15 SNPs with  $P < 0.01$

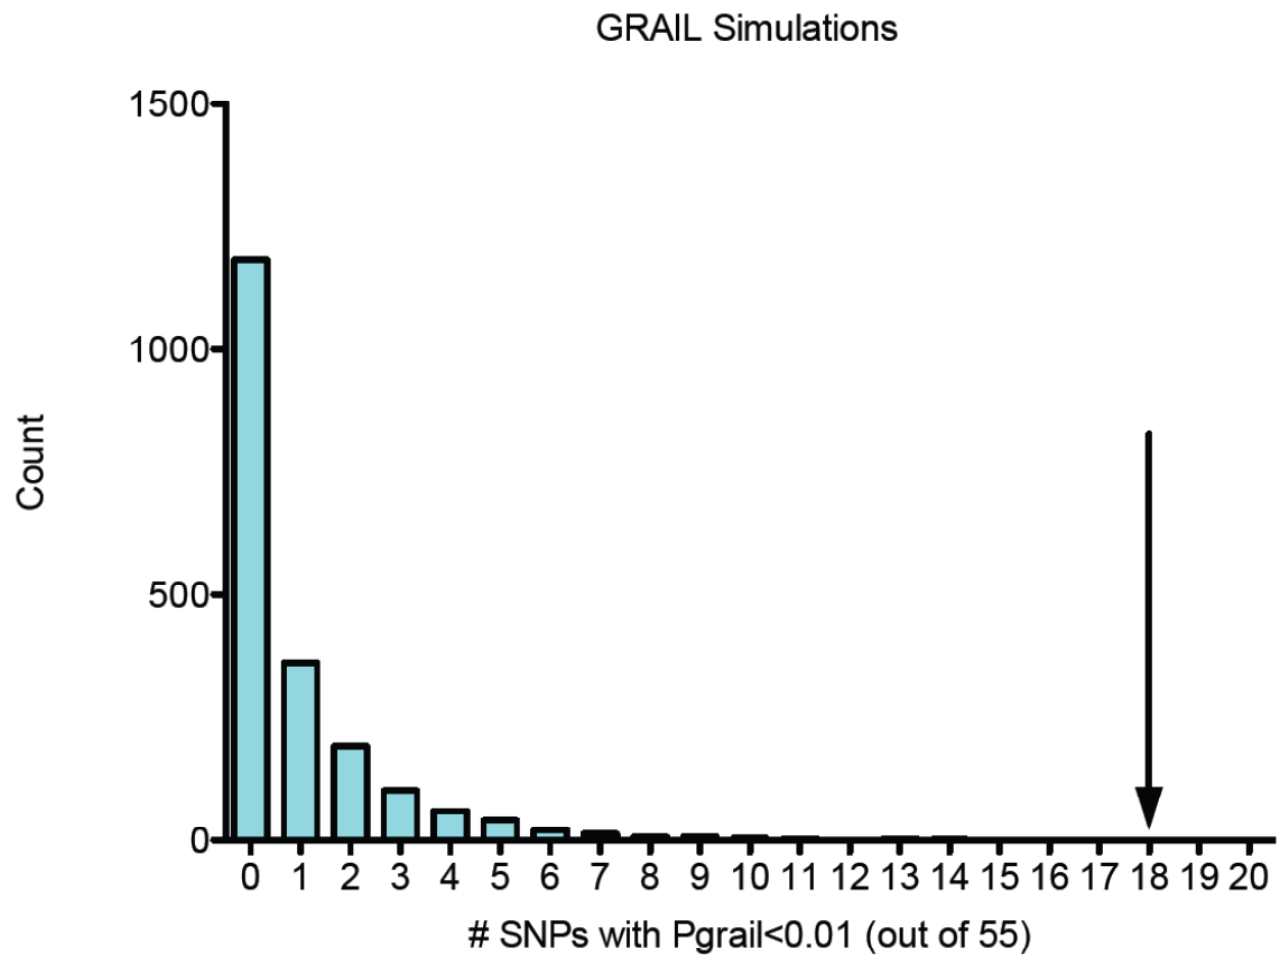

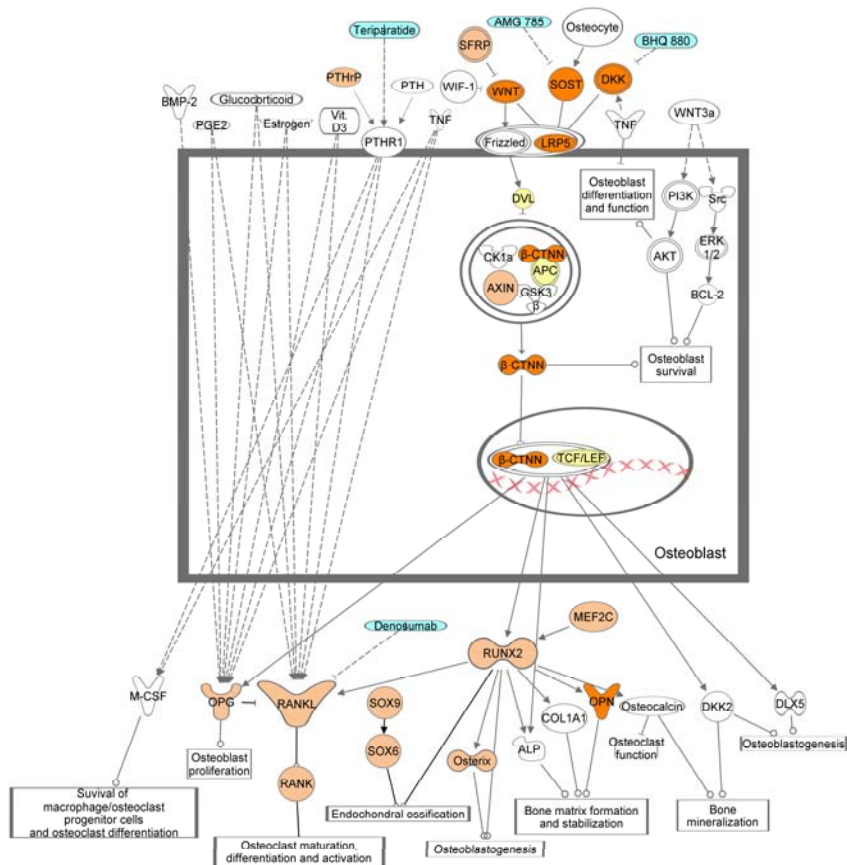

**Supplementary Figure 10.** Graphic representation of the different pathways critical to bone biology including osteoblastic differentiation; Wnt-mediated osteoblastic activation and function; RANK-mediated osteoclastic activation and endochondral ossification. The figure is derived from an image generated by Ingenuity Pathway Analysis (IPA) software version 2011 (Ingenuity Systems). The osteoblast is the main bone-forming cell. Genes identified by SNPs associated with BMD at genome-wide significant levels are coloured pink, genes identified by markers associated with fracture risk are coloured orange, genes identified by markers associated with BMD at  $P < 0.0001$  are coloured in yellow and current pharmacological compounds used or under development (Phase II trials) for the treatment of osteoporosis are coloured aquamarine.

## SUPPLEMENTARY NOTE

### 1. DE-NOVO GENOTYPING (STAGE 2)

#### 1.1. De novo genotyping

A total of 62,203 samples from 34 studies with either BMD and/or fracture information was de-novo genotyped in four main genotyping centers (KBioSciences, AOGC, deCODE and WHI) (Supplementary Methods Table 3D).

##### 1.1.1. KBioSciences

The majority of the studies opted for whole genome amplification (WGA) before genotyping. WGA was done by K-Biosciences (<http://www.kbioscience.co.uk/lab%20services/wga/wga.html>) and samples were stored in freezers for genotyping. We evaluated the genotype concordance between raw DNA genotypes and amplified DNA genotypes in a panel of 82 SNPs within 96 samples. The genotype accuracy before and after amplification was 99.971%. DNA from the OSTEOS study could not be amplified with enough quality and was therefore excluded from all analyzes. All SNPs genotyped by K-Biosciences ([www.kbioscience.co.uk](http://www.kbioscience.co.uk)) used a competitive allele specific PCR (KASPar) assay. A Y-chromosome specific assay was evaluated in all samples. Sample mismatches between the gender specific assay and the reported gender in the questionnaire were removed from analysis.

##### 1.1.2. AOGC

AOGC samples from the Geelong Osteoporosis Study cohort and the Sheffield cohort were directly genotyped at the University of Queensland Diamantina Institute. Two genotyping platforms were used: Applied Biosystems OpenArray (for 72 SNPs) and KBioSciences technology for the remaining 10 SNPs for which a taqman probe could not be designed. Positive and negative controls were used on each plate. Nine SNPs failed QC (rs10048146, rs7017914, rs9466056, rs3736228, rs3755955, rs4240467, rs12995369, rs17040773, rs1053051; 2 using the KBioSciences platform and 7 using OpenArray).



### 1.1.3. deCODE

GENOMOS samples from the PERF (Denmark), DOES (Australia), AMC (South Korea) and the Hong Kong elderly cohorts were directly genotyped for replication at the deCODE Genetics, along with additional deCODE study samples (Iceland). The genotyping was performed on the Centaurus (Nanogen) platform<sup>1</sup>. The quality of each Centaurus SNP assay was evaluated by genotyping each assay in the CEU HapMap samples and comparing the results with the HapMap data. Assays with mismatches >1% were not used and positive and negative controls were present on all genotyping plates in order to ensure correct genotyping. Functional assays meeting all quality criteria could not be made for the markers rs4727338, rs4869742, rs6959212, rs430727, rs1286083, rs6532023, rs4790881, rs12995369 and rs4792909 and these proxy SNPs, rs7781370, rs4870044, rs1403987, rs87938, rs1286077, rs1471403, rs11657636, rs11690020 and rs7220711 were genotyped instead, respectively. For the SNP rs11048046 a functional assay could not be made nor was there a known proxy SNP available. Nine hundred samples from the chip-typed deCODE discovery cohort were also directly genotyped for comparison with the imputed genotypes. The median of the correlation between genotyped and imputed genotypes was 0.97.

### 1.1.4. WHI

A custom Illumina (Illumina, Inc., San Diego, CA, USA) iSELECT genotyping array was designed to analyze 3,923 samples. From the 82 main BMD SNPs the following 15 rsIDs could not be included in the array given design restrictions: rs4240467, rs12821008, rs4233949, rs7851693, rs3736228, rs7953528, rs1566045, rs2062377, rs6426749, rs7932354, rs4869742, rs4727338, rs430727, rs11048046, rs7427438.

## 1.2. Quality Control

Genotyped calls from K-Biosciences, AOGC and deCODE were centrally controlled for: Sample call rate > 80%, SNP call rate > 90%, HWE  $P > 1 \times 10^{-4}$ , MAF > 1%. The following QC filters were applied for samples genotyped by WHI: Sample call rate > 98%, SNP call rate > 98%, HWE  $P > 1 \times 10^{-6}$ , MAF > 0.5%.

## 2. ADDITIONAL ANALYSES

### 2.1. Secondary signals

To evaluate the presence of multiple association signals in one locus, each stage 1 study repeated the primary GWA analysis using models additionally adjusted for the top 82 lead SNPs associated with BMD at  $P < 5 \times 10^{-6}$  with the objective of identifying additional signals in the discovered loci. The effect estimates for each association were calculated using inverse variance fixed-effects meta-analysis. Assuming that approximately 3,000 Mbp in the human genome are usually "genotypable" we tested  $\sim 5.5\%$  of  $\sim 1$  million tests. Hence the threshold we used for selecting secondary signals for replication was set to  $9 \times 10^{-7}$ .

## 2.2. Gene x Gene interaction

Each individual study extracted genotype imputation dosages for each of the top 82 lead SNPs to investigate potential gene-gene interaction. An R-script was provided to each individual study and was run using the extracted dosages. The allele coding was such that the BMD increasing allele (based on the Stage 1 meta-analysis) was always the dosage increasing allele. For the additive dosage and pair-wise interaction analyses ( $Y=b_0+b_1.A+b_2.B+b_3.AB+e$ ; test of  $H_0: b_3 = 0$ ), the dosages were regressed against residuals of sex-standardized Z-scores of FN-BMD and LS-BMD, adjusted for appropriate covariates as with the primary GWA study. For each pair, a linear regression analysis including the two SNPs and their interaction term was performed. Interaction terms were deemed significant at levels of  $1.5 \times 10^{-5}$  accounting for  $(82 \times 81)/2 = 3321$  interaction tests.

## 2.3. Fine Mapping using 1000 Genomes Project data

We imputed SNPs within the 2 Mb genomic region (1 Mb upstream and 1 Mb downstream) of top SNP from each of the 82 loci using the CEU or CHB/JPT as appropriate reference panels of the 1000 Genome Project that was released in June 2010. The imputation was performed using either MACH or IMPUTE in samples from 9 discovery cohorts including, AOGC (women only), DECODE, FHS, GOOD (men only), HEALTHABC, HKOS (women only), INDIANA (women only), ORCADES, RSI, RSII and RSIII. The total sample is 21,699 men and women for FN-BMD and 20,835 men and women for LS-BMD. A total of 495,634 SNPs with variance ratio  $> 0.3$  in at least one study was imputed and used for this analysis. SNP-phenotype association was performed in each study and a fixed-effected inverse-variance meta-analysis was performed to estimate association p-values. We excluded SNPs only available in 4 or less studies. SNPs with higher heterogeneity ( $I^2 > 50$ ) were also excluded. We defined "stronger evidence of association" as a P-value difference of more than one order of magnitude to avoid drawing conclusions from random variation in the test statistics. Physical-based SNP annotation by categorizing according to their position relative to genes (intronic, exonic, UTR, promoter, flanking, inter-genic, etc.) was done using the Human GRCh37 reference genome and Ensembl transcripts. Pair-wise Linkage Disequilibrium (LD) was estimated using haplotype information from 1000 Genome Project European reference panel. Functional predictions of gene or SNPs have been shown to provide supportive evidence of GWAS findings and can be used to prioritize the GWAS top hits for further studies<sup>2</sup>. We predicted the potential functional effects on following types of SNPs: the premature translation termination (nonsense); the exonic SNPs that cause an amino acid change in conservative genomic region across multiple species (non-conservative non-synonymous)<sup>3</sup>; the exonic SNPs that affect protein function based on sequence homology and the physical properties of amino acids (non-conservative non-synonymous)<sup>4</sup>; the splicing sites that lead to a protein domain being abolished.<sup>5</sup>; synonymous SNPs located at exonic splicing enhancer motifs<sup>6,7</sup> and the exonic splicing silencer motifs<sup>8</sup>; the transcription factor binding sites at promoter regions<sup>9-11</sup>; the 3-UTR post-transcriptional regulatory region<sup>12</sup>; and miRNA sites<sup>13</sup>.

## 2.4. Gene expression

Expression profiles at 55 of the 56 GWS loci were analysed within several eQTL datasets. We chose to omit the 17q21.31\_2 locus because of the known rearrangements at this locus (inversion, duplications, and deletions) with resulting variable number of many of the genes at this locus.

The first eQTL dataset, published by Reppe and colleagues<sup>14</sup>, tested the relationship between gene expressions in trans-iliacal bone biopsies and BMD in 84 unrelated postmenopausal women. Transcripts that located within +/- 500kb of the candidate SNPs at the GWS loci were queried in a dataset of eQTLs that correlated with adjusted BMD with a p-value below 0.1 in the published dataset, 163 uniquely mapping transcripts in total for FN- and LS-BMD. Affymetrix HG U133 2.0 plus array was used for expression analysis, as previously described<sup>14</sup>.

The second eQTL dataset used expression data from multiple publicly available and in-house datasets to carry out cis-association analysis: **a)** CEU lymphoblastoid cell lines (n=60) for expression QTL association<sup>15</sup> using Illumina Sentrix Human-6 Expression BeadChip version 1 and Genotypes from HapMap project, **b)** allelic expression cis-associations using Illumina Human1M-duo BeadChip for lymphoblastoid cell lines (n=53)<sup>16</sup> and for fibroblasts, Illumina HumanRef-8 v3.0 for expression traits and Illumina HapMap 1M Duo chip for genotypes (Pastinen, unpublished data), and **c)** RNAseq CEU eQTLs, where expression values were taken from RNA sequencing data (Illumina GA2) and genotypes from HapMap project<sup>17</sup> (lymphoblastoid cell lines, n=60); **d)** primary human fibroblasts (n=64) treated with cholesterol, resveratrol, and ethanol (Pastinen, unpublished data), and primary human osteoblasts (HOb) (n=104) treated with bone morphogenetic protein BMP-2, dexamethasone, prostaglandin E2, and control PBS using Illumina HumRef-8v2 BeadChips for expression traits and Illumina HapMap 550k Duo chip for genotypes<sup>18</sup>. Cis-regulatory effects were tested using SNPs mapping the candidate SNP +/- 500kb. For the fibroblast and osteoblast samples, due to limited genotype information, we imputed the genotypes (MACH 1.0) for HapMap SNPs to provide a larger density of SNPs to test. Cis-associations for most datasets were carried out using a linear regression model implemented in the PLINK software package. Association analysis for the HOb datasets was carried out using MACH2QTL, using the genotype imputation data. For the RNAseq CEU eQTL analysis, Spearman-rank correlation was used as implemented in the R (version 2.12.1) software package. Variance  $r^2$  is given for all eQTL datasets except for the RNAseq CEU analysis, where the rho value was calculated.

The third eQTL dataset at deCODE Genetics utilizes expression data from adipose tissue and whole blood from 603 and Icelandic individuals, respectively<sup>19</sup>. Genotyping was performed using Infinium HumanHap300 and 370CNV BeadChips (Illumina) and genotypes imputed into HapMap 2.5m SNPs using IMPUTE. Expression analysis was performed using an Agilent microarray of 23,700 transcripts. The correlation between the SNPs and expression of genes at the 56 GWS loci (located within +/- 500kb from the candidate SNP) was tested by linear regression analysis of normalized expression level (age, sex, BMI and weight adjusted, and for differential cell count in case of whole blood) on SNP genotypes as previously described<sup>20</sup>.

The fourth eQTL dataset is derived from circulating monocytes in 1,490 unrelated individuals, published by Zeller and colleagues<sup>21</sup> (publicly available at [genecanvas.ecgene.net](http://genecanvas.ecgene.net)). All associations between SNPs and expressions with a p-value <  $5 \times 10^{-5}$  were available for querying, using data analysed as described<sup>21</sup>, of expression traits measured on Illumina Human HT-12 expression BeadChip (12,808 detectable expression traits) and SNPs genotyped on an

Affymetrix 6.0 array. Expression of genes located within +/- 500kb from the candidate GWS SNPs at the 56 loci were queried for association in the dataset. Proxy SNPs were used for 42 SNPs that are not present on the Affymetrix 6.0 array ( $r^2 > 0.7$ ), no proxy was available for the 4 SNPs, rs5934507 (chrX), rs13336428 (16p13.3\_2), rs1566045 (16q12.1) and rs3755955 (4p16.3) and these loci therefore not represented in this dataset. Study-wise threshold of significance correcting of the number of expressions tested was set at  $P < 5 \times 10^{-5}$ .

## 2.5. Literature-based annotation with GRAIL

The Gene Relationships Across Implicated Loci (GRAIL)<sup>22</sup> software was used to investigate relationships between 55 autosomal loci identified from the combined results. Briefly, GRAIL evaluates connectivity and relationships between identified loci, by systematically mining Pubmed abstracts for shared text amongst possible genes at associated loci. Genes from independently identified loci that have increased sharing of text in the scientific literature are more likely to be functionally related and therefore more likely to be truly involved in disease pathogenesis<sup>22</sup>. As no information about the phenotype is used, the relatedness of genes at associated loci is not biased with respect to the phenotype. We conducted GRAIL analysis using the December 2006 Pubmed data set (avoiding potential bias from investigation of candidate genes stimulated by GWAS), the HG18 build of the human genome, and the 55 autosomal BMD loci with a p-value  $< 5 \times 10^{-8}$ .

To confirm the significance of these findings, we followed a previously described strategy.<sup>22</sup> We applied GRAIL to 2000 random matched SNP sets; each set consisted of 55 SNPs randomly selected from a previously published<sup>23</sup> set of 56,988 HapMap SNPs after LD pruning. We selected SNPs in LD with at least one gene, and so that in aggregate the total number of genes implicated was 224 +/-11 genes. These SNP sets matched the 55 SNPs associated with BMD in terms of total gene content, since those genes implicated 224 genes in aggregate. Then we individually tested each SNP test through GRAIL, noting with each run what proportion of SNPs demonstrated connectivity with  $p_{text}$  scores  $\leq 0.01$ .

## 2.6. Allele Risk Modeling

To estimate the cumulative effect of the genetic variants, we constructed genetic susceptibility scores that summed the weighted number of 55 autosomal and 8 secondary BMD-decreasing alleles, where the weights were derived from the beta-coefficients of the relationship between BMD and the BMD-decreasing allele. The "osteoporosis" outcome, was defined as having a FN-BMD T-score  $< -2.5$ . We used the NHANES<sup>24</sup> (female) mean and SD (mean 0.849, SD 0.109) to estimate T-scores from the raw FN-BMD ( $T = (ZFNBM - 0.849)/0.109$ ). For the fracture risk modeling, first we used the 16 SNPs also associated with fracture risk were used to construct the genetic susceptibility scores and then compared the results by including the rest of the non-significantly associated SNPs. For this analysis, the weights were derived from the beta-coefficients of the relationship between fracture risk and the risk-increasing allele.

Models were estimated using the Prospective Epidemiological Risk Factor (PERF) study. This study is composed of postmenopausal women, in the age range 55-86 years, taking part in a prospective epidemiological study and in various clinical trials for osteoporosis at the Center for Clinical and Basic Research, Copenhagen. Baseline DEXA- measurement (Hologic QDR2000) at the hip (total hip) and lumbar spine (L2-L4) was used. Osteoporotic fractures included low trauma fractures from medical records and radiographic documentation. (Supplementary Methods Table 3A, 3B, 3C). A subset of 2,836 women with both FN-BMD and fracture information were used for this analysis.

The PERF study was genotyped in Stage 2, had relatively large numbers of women with fracture ascertainment, and was not included in the discovery set. Furthermore, effect estimates of a meta-analysis excluding PERF in the Stage 2 replication samples were used to weight BMD-decreasing alleles. Weights were transformed to have a mean=1 by dividing each effect by the median of the FN-BMD effects. Weights for each of the 63 SNPs are available in the Supplementary Tables.

We performed profile scoring for each individual of the PERF study as implemented in PLINK, where:

$$\text{Score}_i = \sum_{j=1 \text{ to } m} b_j x_{ij}, \text{ where}$$

m= number of SNPs  
 $b_j$  =effect of allele at locus  $j$   
 $x_{ij}$ =number of reference alleles of individual  $i$  at locus  $j$

The resulting genetic scores were divided in quintiles and the mean FN-BMD, osteoporosis risk and fracture risk estimates were computed per each quintile of weighted allele score. The performance of the osteoporosis and fracture prediction properties of the genetic score was quantified using the area under the receptor-operator characteristics (ROC) curves implemented in the software PredictABEL<sup>25</sup>. For this analysis the continuous weighted genotypic risk score was used in a regression model. Finally, the measure of variance explained (adjusted  $r^2$ ) was estimated from a linear regression model incorporating the quantitative score as the predictor and the age- and weight adjusted standardized FN-BMD residuals as outcome.

### 3. URLS

METAL: <http://www.sph.umich.edu/csg/abecasis/Metal/>

KbioSicences: <http://www.kbioscience.co.uk/>

PLINK: <http://pngu.mgh.harvard.edu/purcell/plink/>

GenABEL suite: <http://www.genabel.org/>

HapMap: <http://www.hapmap.org/>

LocusZoom: <http://csg.sph.umich.edu/locuszoom/>

1000 Genomes: <http://www.1000genomes.org/>

## 4. SUPPLEMENTARY REFERENCES

1. Kutuyavin, I.V. *et al.* A novel endonuclease IV post-PCR genotyping system. *Nucleic Acids Res* **34**, e128 (2006).
2. Hsu, Y.H. *et al.* An integration of genome-wide association study and gene expression profiling to prioritize the discovery of novel susceptibility Loci for osteoporosis-related traits. *PLoS Genet* **6**, e1000977 (2010).
3. Adzhubei, I.A. *et al.* A method and server for predicting damaging missense mutations. *Nat Methods* **7**, 248-9 (2010).
4. Kumar, P., Henikoff, S. & Ng, P.C. Predicting the effects of coding non-synonymous variants on protein function using the SIFT algorithm. *Nat Protoc* **4**, 1073-81 (2009).
5. Boeckmann, B. *et al.* The SWISS-PROT protein knowledgebase and its supplement TrEMBL in 2003. *Nucleic Acids Res* **31**, 365-70 (2003).
6. Cartegni, L., Chew, S.L. & Krainer, A.R. Listening to silence and understanding nonsense: exonic mutations that affect splicing. *Nat Rev Genet* **3**, 285-98 (2002).
7. Fairbrother, W.G., Yeh, R.F., Sharp, P.A. & Burge, C.B. Predictive identification of exonic splicing enhancers in human genes. *Science* **297**, 1007-13 (2002).
8. Wang, Z. *et al.* Systematic identification and analysis of exonic splicing silencers. *Cell* **119**, 831-45 (2004).
9. Hu, J., Li, B. & Kihara, D. Limitations and potentials of current motif discovery algorithms. *Nucleic Acids Res* **33**, 4899-913 (2005).
10. Kim, T.H. *et al.* A high-resolution map of active promoters in the human genome. *Nature* **436**, 876-80 (2005).
11. Won, K.J., Ren, B. & Wang, W. Genome-wide prediction of transcription factor binding sites using an integrated model. *Genome Biol* **11**, R7 (2010).
12. Wang, X. & El Naqa, I.M. Prediction of both conserved and nonconserved microRNA targets in animals. *Bioinformatics* **24**, 325-32 (2008).
13. Kozomara, A. & Griffiths-Jones, S. miRBase: integrating microRNA annotation and deep-sequencing data. *Nucleic Acids Res* **39**, D152-7 (2011).
14. Reppe, S. *et al.* Eight genes are highly associated with BMD variation in postmenopausal Caucasian women. *Bone* **46**, 604-12 (2010).
15. Stranger, B.E. *et al.* Population genomics of human gene expression. *Nat Genet* **39**, 1217-24 (2007).
16. Ge, B. *et al.* Global patterns of cis variation in human cells revealed by high-density allelic expression analysis. *Nat Genet* **41**, 1216-22 (2009).
17. Montgomery, S.B. *et al.* Transcriptome genetics using second generation sequencing in a Caucasian population. *Nature* **464**, 773-7 (2010).
18. Grundberg, E. *et al.* Global analysis of the impact of environmental perturbation on cis-regulation of gene expression. *PLoS Genet* **7**, e1001279 (2011).
19. Emilsson, V. *et al.* Genetics of gene expression and its effect on disease. *Nature* **452**, 423-8 (2008).
20. Thorleifsson, G. *et al.* Genome-wide association yields new sequence variants at seven loci that associate with measures of obesity. *Nat Genet* **41**, 18-24 (2009).
21. Zeller, T. *et al.* Genetics and beyond--the transcriptome of human monocytes and disease susceptibility. *PLoS One* **5**, e10693 (2010).
22. Raychaudhuri, S. *et al.* Identifying relationships among genomic disease regions: predicting genes at pathogenic SNP associations and rare deletions. *PLoS Genet* **5**, e1000534 (2009).

23. Lango Allen, H. *et al.* Hundreds of variants clustered in genomic loci and biological pathways affect human height. *Nature* **467**, 832-8 (2010).
24. Looker, A.C. *et al.* Prevalence of low femoral bone density in older U.S. women from NHANES III. *J Bone Miner Res* **10**, 796-802 (1995).
25. Kundu, S., Aulchenko, Y.S., van Duijn, C.M. & Janssens, A.C. PredictABEL: an R package for the assessment of risk prediction models. *Eur J Epidemiol* **26**, 261-4 (2011).

## 5. COHORT-SPECIFIC CONTRIBUTIONS

| Type of Contribution | Cohort            | Name                     | Overseeing (PI) | Genotyping | Phenotyping | Data analysis |
|----------------------|-------------------|--------------------------|-----------------|------------|-------------|---------------|
| GWAS                 | AFOS              | Alan R Shuldiner         | X               |            |             |               |
| GWAS                 | AFOS              | Braxton D Mitchell       | X               |            |             |               |
| GWAS                 | AFOS              | Elizabeth A Streeten     | X               |            | X           |               |
| GWAS                 | AFOS              | Laura M Yerges-Armstrong |                 |            |             | X             |
| GWAS                 | AOGC              | Dana Willner             |                 |            |             | X             |
| GWAS                 | AOGC              | David M Evans            |                 |            |             | X             |
| GWAS                 | AOGC              | Elaine M Dennison        |                 |            | X           |               |
| GWAS                 | AOGC              | Emma L Duncan            |                 | X          | X           | X             |
| GWAS                 | AOGC              | Eugene McCloskey         | X               |            | X           |               |
| GWAS                 | AOGC              | Geoffrey C Nicholson     | X               |            | X           |               |
| GWAS                 | AOGC              | Graeme Jones             | X               |            | X           |               |
| GWAS                 | AOGC              | Graeme R Clark           |                 | X          |             |               |
| GWAS                 | AOGC              | Ian R Reid               | X               |            | X           |               |
| GWAS                 | AOGC              | John A Eisman            | X               |            | X           | X             |
| GWAS                 | AOGC              | John P Kemp              |                 |            |             | X             |
| GWAS                 | AOGC              | Matthew A Brown          | X               | X          | X           | X             |
| GWAS                 | AOGC              | Patrick Danoy            |                 | X          |             |               |
| GWAS                 | AOGC              | Paul J Leo               |                 |            |             | X             |
| GWAS                 | AOGC              | Philip N Sambrook        | X               |            | X           |               |
| GWAS                 | AOGC              | Richard Eastell          | X               |            | X           |               |
| GWAS                 | CHS               | Bruce M Psaty            | X               |            |             |               |
| GWAS                 | CHS               | Guo Li                   |                 |            |             | X             |
| GWAS                 | CHS               | Jerome I Rotter          |                 | X          |             | X             |
| GWAS                 | CHS               | John Robbins             |                 |            | X           |               |
| GWAS                 | CHS, HealthABC    | Jane A Cauley            | X               |            | X           |               |
| GWAS                 | deCODE            | Gudmar Thorleifsson      |                 |            |             | X             |
| GWAS                 | deCODE            | Gunnar Sigurdsson        |                 |            | X           |               |
| GWAS                 | deCODE            | Hrefna Johannsdottir     |                 | X          |             |               |
| GWAS                 | deCODE            | Kari Stefansson          | X               |            |             |               |
| GWAS                 | deCODE            | Stefan Th. Palsson       |                 | X          |             |               |
| GWAS                 | deCODE            | Thorvaldur Ingvarsson    |                 |            | X           |               |
| GWAS                 | deCODE            | Unnur Styrkarsdottir     | X               | X          | X           | X             |
| GWAS                 | deCODE            | Unnur Thorsteinsdottir   | X               |            |             |               |
| GWAS                 | EPIC-Norfolk      | Alireza Moayyeri         |                 |            | X           | X             |
| GWAS                 | EPIC-Norfolk      | Kay-Tee Khaw             | X               |            |             |               |
| GWAS                 | EPIC-Norfolk      | Nick J Wareham           | X               | X          |             |               |
| GWAS                 | EPIC-Norfolk      | Robert Luben             |                 | X          | X           | X             |
| GWAS                 | EPIC-Norfolk,EPOS | Jonathan Reeve           | X               |            | X           |               |
| GWAS                 | EPIC-Norfolk,EPOS | Stephen K Kaptoge        |                 |            | X           | X             |
| GWAS                 | ERF               | Ben A Oostra             |                 |            | X           |               |
| GWAS                 | ERF               | Cornelia M van Duijn     | X               |            | X           |               |
| GWAS                 | ERF               | M. Carola Zillikens      | X               |            | X           |               |
| GWAS                 | ERF               | Najaf Amin               |                 |            |             | X             |
| GWAS                 | ERF               | Yurii S Aulchenko        |                 | X          |             |               |
| GWAS                 | Fram              | Ching-Ti Liu             |                 |            |             | X             |
| GWAS                 | Fram              | David Karasik            |                 |            |             | X             |
| GWAS                 | Fram              | Douglas P. Kiel          | X               |            | X           | X             |
| GWAS                 | Fram              | Kannabiran Nandakumar    |                 |            |             | X             |
| GWAS                 | Fram              | L. Adrienne Cupples      | X               | X          |             |               |
| GWAS                 | Fram              | Yanhua Zhou              |                 |            |             | X             |
| GWAS                 | Fram              | Yi-Hsiang Hsu            |                 |            |             | X             |
| GWAS                 | GOOD, MrOS Sweden | Claes Ohlsson            | X               | X          | X           |               |
| GWAS                 | GOOD              | Joel Eriksson            |                 |            |             | X             |
| GWAS                 | GOOD              | Liesbeth Vandenput       |                 | X          |             | X             |
| GWAS                 | GOOD              | Mattias Lorentzon        | X               | X          | X           |               |
| GWAS                 | Health ABC        | Candace M. Kammerer      |                 |            |             | X             |
| GWAS                 | Health ABC        | Frances A. Tyllavsky     | X               |            |             |               |
| GWAS                 | Health ABC        | Ryan L. Minster          |                 |            |             | X             |
| GWAS                 | Health ABC        | Steven R. Cummings       | X               |            |             |               |
| GWAS                 | Health ABC        | Yongmei Liu              |                 | X          | X           |               |
| GWAS                 | Health ABC,AGES   | Tamara B. Harris         | X               |            |             |               |
| GWAS                 | HKOS              | Annie Wai Chee Kung      | X               |            | X           |               |
| GWAS                 | HKOS              | Pak Chung Sham           | X               |            |             | X             |
| GWAS                 | HKOS              | Su-Mei Xiao              |                 | X          | X           | X             |
| GWAS                 | INDIANA           | Daniel L Koller          |                 |            |             | X             |
| GWAS                 | INDIANA           | Michael J Econs          | X               |            | X           |               |



## 5. COHORT-SPECIFIC CONTRIBUTIONS

| Type of Contribution   | Cohort                 | Name                      | Overseeing (PI) | Genotyping | Phenotyping | Data analysis |
|------------------------|------------------------|---------------------------|-----------------|------------|-------------|---------------|
| GWAS                   | INDIANA                | Munro Peacock             | X               |            | X           |               |
| GWAS                   | ORCADES                | James F Wilson            | X               |            | X           |               |
| GWAS                   | ORCADES,EDOS           | Omar ME Albagha           |                 |            | X           | X             |
| GWAS                   | ORCADES,EDOS           | Stuart H Ralston          | X               |            | X           |               |
| GWAS                   | RS-I, RS-II & RS-III   | Albert Hofman             | X               |            | X           |               |
| GWAS                   | RS-I, RS-II & RS-III   | Andre G. Uitterlinden     | X               | X          | X           |               |
| GWAS                   | RS-I, RS-II & RS-III   | Carolina Medina-Gómez     |                 | X          |             |               |
| GWAS                   | RS-I, RS-II & RS-III   | Fernando Rivadeneira      | X               | X          | X           | X             |
| GWAS                   | RS-I, RS-II & RS-III   | Huibert A.P. Pols         | X               |            | X           |               |
| GWAS                   | RS-I, RS-II & RS-III   | Joyce B.J. van Meurs      |                 | X          | X           |               |
| GWAS                   | RS-I, RS-II & RS-III   | Karol Estrada             |                 | X          |             | X             |
| GWAS                   | RS-I, RS-II & RS-III   | Ling Oei                  |                 | X          |             | X             |
| GWAS                   | RS-I, RS-II & RS-III   | Lizbeth Herrera           |                 | X          |             |               |
| GWAS                   | RS-I, RS-II & RS-III   | Martha Castano-Betancourt |                 |            | X           |               |
| GWAS                   | TUK1, TUK23            | Frances MK Williams       |                 |            | X           |               |
| GWAS                   | TUK1, TUK23            | Hou-Feng Zheng            |                 |            |             | X             |
| GWAS                   | TUK1, TUK23            | J Brent Richards          | X               |            |             | X             |
| GWAS                   | TUK1, TUK23            | Rui Li                    |                 |            |             | X             |
| GWAS                   | TUK1, TUK23            | Scott G Wilson            |                 |            | X           |               |
| GWAS                   | TUK1, TUK23            | Timothy D Spector         | X               | X          | X           |               |
| Meta-analytical center | IOANNINA               | Evangelia E Ntzani        |                 |            |             | X             |
| Meta-analytical center | IOANNINA               | Evangelos Evangelou       |                 |            |             | X             |
| Meta-analytical center | IOANNINA               | John P.A. Ioannidis       | X               |            |             | X             |
| GxG                    | GxG Analytical support | Andrew R Wood             |                 |            |             | X             |
| INSILICO               | AGES Reykjavik study   | Albert V Smith            |                 |            |             | X             |
| INSILICO               | AGES Reykjavik study   | Kristin Siggeirsdottir    |                 |            | X           |               |
| INSILICO               | AGES Reykjavik study   | Melissa Garcia            |                 |            |             | X             |
| INSILICO               | AGES Reykjavik study   | Thor Aspelund             |                 |            | X           | X             |
| INSILICO               | AGES Reykjavik study   | Vilmundur Gudnason        | X               |            | X           |               |
| INSILICO               | PROSPER/PHASE study    | Brendan M. Buckley        | X               |            |             |               |
| INSILICO               | PROSPER/PHASE study    | Ian Ford                  | X               |            |             |               |
| INSILICO               | PROSPER/PHASE study    | J Wouter Jukema           | X               |            |             |               |
| INSILICO               | PROSPER/PHASE study    | P Eline Slagboom          | X               |            |             |               |
| INSILICO               | PROSPER/PHASE study    | Stella Trompet            |                 | X          |             | X             |
| INSILICO               | WGHS                   | Daniel I. Chasman         | X               | X          | X           | X             |
| INSILICO               | WGHS                   | Lynda M. Rose             |                 |            | X           | X             |
| INSILICO               | WGHS                   | Paul M Ridker             | X               |            | X           |               |
| INSILICO               | WHI                    | Aaron K Aragaki           |                 | X          | X           | X             |
| INSILICO               | WHI                    | Andrea Z Lacroix          |                 | X          | X           | X             |
| INSILICO               | WHI                    | Charles Kooperberg        |                 | X          | X           | X             |
| INSILICO               | WHI                    | David J Duggan            |                 | X          |             |               |
| INSILICO               | WHI                    | Rebecca D Jackson         | X               | X          | X           | X             |
| INSILICO               | Young Finns Study      | Jorma Viikari             | X               |            | X           |               |
| INSILICO               | Young Finns Study      | Marika Laaksonen          |                 |            | X           |               |
| INSILICO               | Young Finns Study      | Mika Kähönen              | X               |            | X           |               |
| INSILICO               | Young Finns Study      | Olli Raitakari            | X               |            | X           | X             |
| INSILICO               | Young Finns Study      | Terho Lehtimäki           | X               | X          |             | X             |
| INSILICO               | Young Finns Study      | Ville Aalto               |                 |            |             | X             |
| De novo                | APOSS, NOSOS           | David M. Reid             |                 |            | X           |               |
| De novo                | APOSS, NOSOS           | Lynne J Hocking           |                 |            |             | X             |
| De novo                | AROS, DOPS             | Bente Lomholt Langdahl    | X               |            |             |               |
| De novo                | AROS, DOPS             | Lise Bjerre Husted        |                 |            | X           |               |
| De novo                | AUSTRIOSB, AUSTRIOSB   | Barbara Obermayer-Pietsch |                 | X          | X           | X             |
| De novo                | AUSTRIOSB, AUSTRIOSB   | Olivia Trummer            |                 | X          |             |               |
| De novo                | BARCOS                 | Natàlia Garcia-Giralt     |                 |            | X           |               |
| De novo                | BARCOS                 | Roser Urreiziti           | X               |            |             |               |
| De novo                | BARCOS                 | Susana Balcells           | X               |            |             |               |
| De novo                | BARCOS                 | Xavier Nogues             | X               |            | X           |               |
| De novo                | Cabrio-C, Cabrio-CC    | Jesús González-Macías     | X               |            |             |               |
| De novo                | Cabrio-C, Cabrio-CC    | José M. Olmos             | X               |            | X           |               |
| De novo                | Cabrio-C, Cabrio-CC    | José A. Riancho           | X               |            | X           |               |
| De novo                | Cabrio-C, Cabrio-CC    | María T. Zarrabeitia      | X               |            |             |               |
| De novo                | AOGC,CAIFOS            | Richard L Prince          | X               | X          | X           |               |
| De novo                | CAIFOS                 | Joshua R Lewis            |                 | X          |             |               |
| De novo                | CAIFOS                 | Kun Zhu                   |                 |            | X           |               |
| De novo                | Calex-family           | Markku Alen               | X               |            |             |               |

## 5. COHORT-SPECIFIC CONTRIBUTIONS

| Type of Contribution | Cohort                          | Name                   | Overseeing (PI) | Genotyping | Phenotyping | Data analysis |
|----------------------|---------------------------------|------------------------|-----------------|------------|-------------|---------------|
| De novo              | Calex-family                    | Sulin Cheng            |                 | X          |             | X             |
| De novo              | CaMos                           | David Goltzman         | X               |            |             |               |
| De novo              | CaMos                           | Millan S. Patel        |                 |            |             | X             |
| De novo              | DOES                            | Jacqueline R Center    |                 |            | X           | X             |
| De novo              | DOES                            | Tuan V Nguyen          |                 |            |             | X             |
| De novo              | EDOS                            | Nerea Alonso           |                 |            | X           |               |
| De novo              | EPOLOS                          | Marcin Kruk            |                 |            | X           |               |
| De novo              | EPOLOS                          | Roman S Lorenc         | X               |            |             |               |
| De novo              | EPOS                            | Serena Scollen         |                 | X          |             |               |
| De novo              | FLOS                            | Laura Masi             | X               |            | X           |               |
| De novo              | FLOS                            | Maria Luisa Brandi     | X               |            | X           |               |
| De novo              | GEOS                            | François Rousseau      | X               |            | X           |               |
| De novo              | GEOS                            | Sylvie Giroux          |                 | X          | X           |               |
| De novo              | GEVUR                           | Elza Khusnutdinova     |                 | X          |             |               |
| De novo              | GEVUR                           | Rita Khusainova        |                 | X          |             |               |
| De novo              | GROS                            | Panagoula Kollia       | X               |            |             |               |
| De novo              | GROS                            | Theodora Koromila      |                 |            | X           | X             |
| De novo              | GROS                            | Zoe Dailiana           |                 |            | X           |               |
| De novo              | HCS                             | Cyrus Cooper           | X               |            |             |               |
| De novo              | HCS                             | Karen A. Jameson       |                 |            | X           |               |
| De novo              | HK                              | Jean Woo               |                 |            | X           |               |
| De novo              | HK                              | Nelson L.S. Tang       | X               |            |             |               |
| De novo              | HK                              | Ping C. Leung          |                 |            | X           |               |
| De novo              | KorAMC                          | Ghi Su Kim             |                 |            | X           |               |
| De novo              | KorAMC                          | Jung-Min Koh           | X               |            | X           |               |
| De novo              | KorAMC                          | Seung Hun Lee          |                 |            | X           |               |
| De novo              | LASA                            | Natasja M. van Schoor  |                 |            | X           |               |
| De novo              | LASA                            | Paul Lips              | X               |            |             |               |
| De novo              | ManMC                           | William D. Leslie      | X               |            |             |               |
| De novo              | MrOS Sweden                     | Dan Mellström          | X               |            | X           |               |
| De novo              | MrOS Sweden                     | Magnus Karlsson        | X               |            | X           |               |
| De novo              | MrOS Sweden                     | Östen Ljunggren        | X               |            | X           |               |
| De novo              | OAS                             | Morten Frost           | X               |            | X           |               |
| De novo              | OAS                             | Wim van Hul            | X               |            | X           |               |
| De novo              | OSTEOS                          | George Dedoussis       | X               |            |             |               |
| De novo              | PERF                            | Claus Christiansen     | X               |            | X           |               |
| De novo              | SLO-PREVAL                      | Janez Prezelj          | X               |            | X           | X             |
| De novo              | SLO-PREVAL                      | Janja Marc             | X               | X          | X           | X             |
| De novo              | SLO-PREVAL                      | Simona Mencej-Bedrac   |                 | X          |             | X             |
| De novo              | UFO                             | Göran Hallmans         |                 |            | X           | X             |
| De novo              | UFO                             | Olle Svensson          |                 |            | X           | X             |
| De novo              | UFO                             | Ulrika Pettersson      | X               |            | X           | X             |
| De novo              | deCODE                          | Gudmar Thorleifsson    |                 |            |             | X             |
| De novo              | deCODE                          | Gunnar Sigurdsson      |                 |            | X           |               |
| De novo              | deCODE                          | Hrefna Johannsdottir   |                 | X          |             |               |
| De novo              | deCODE                          | Kari Stefansson        | X               |            |             |               |
| De novo              | deCODE                          | Stefan Th. Palsson     |                 | X          |             |               |
| De novo              | deCODE                          | Thorvaldur Ingvarsson  |                 |            | X           |               |
| De novo              | deCODE                          | Unnur Styrkarsdottir   | X               | X          | X           | X             |
| De novo              | deCODE                          | Unnur Thorsteinsdottir | X               |            |             |               |
| EQTL                 | eQTL analytical center (deCODE) | Gudmar Thorleifsson    |                 |            |             | X             |
| EQTL                 | eQTL analytical center (deCODE) | Unnur Styrkarsdottir   | X               | X          | X           | X             |
| EQTL                 | eQTL analytical center (deCODE) | Unnur Thorsteinsdottir | X               |            |             |               |
| EQTL                 | eQTL analytical center (deCODE) | Kari Stefansson        | X               |            |             |               |
| EQTL                 | eQTL analytical center (CA)     | Dominique Verlaan      |                 | X          | X           |               |
| EQTL                 | eQTL analytical center (CA)     | Elin Grundberg         |                 | X          | X           |               |
| EQTL                 | eQTL analytical center (CA)     | Tomi Pastinen          | X               |            |             |               |
| EQTL                 | eQTL analytical center (CA)     | Tony Kwan              |                 | X          |             |               |
| EQTL                 | eQTL analytical center (NO)     | Kaare M. Gautvik       | X               | X          | X           |               |
| EQTL                 | eQTL analytical center (NO)     | Sjur Reppe             |                 | X          | X           | X             |
| GRAIL                | Grail Analytical Support        | Soumya Raychaudhuri    |                 |            |             | X             |

6. FULL ACKNOWLEDGMENTS

| Cohort               | Full Acknowledgments                                                                                                                                                                                                                                                                                                                                                                                                                                                                                                                                                                                                                                                                                                                                                                                                                                                                                                                                                                                                                                                                                                                                                                                                                                                                                                                                                                                                                                                                                                                                                                                                                                                                                                                                                                                                                                                                                                                                                                                                                                                                                                                                                                                                                                                                                                                                                                                                                                                                                                                                                                                                                                                                                        | ACKNOWLEDGMENTS (funding agencies)                                                                                                                                                                                                                                                                                                                                                                                                                                                                                                                                                                                                                                                                                                                                                                                                                                                                                                                                                                                                                               |
|----------------------|-------------------------------------------------------------------------------------------------------------------------------------------------------------------------------------------------------------------------------------------------------------------------------------------------------------------------------------------------------------------------------------------------------------------------------------------------------------------------------------------------------------------------------------------------------------------------------------------------------------------------------------------------------------------------------------------------------------------------------------------------------------------------------------------------------------------------------------------------------------------------------------------------------------------------------------------------------------------------------------------------------------------------------------------------------------------------------------------------------------------------------------------------------------------------------------------------------------------------------------------------------------------------------------------------------------------------------------------------------------------------------------------------------------------------------------------------------------------------------------------------------------------------------------------------------------------------------------------------------------------------------------------------------------------------------------------------------------------------------------------------------------------------------------------------------------------------------------------------------------------------------------------------------------------------------------------------------------------------------------------------------------------------------------------------------------------------------------------------------------------------------------------------------------------------------------------------------------------------------------------------------------------------------------------------------------------------------------------------------------------------------------------------------------------------------------------------------------------------------------------------------------------------------------------------------------------------------------------------------------------------------------------------------------------------------------------------------------|------------------------------------------------------------------------------------------------------------------------------------------------------------------------------------------------------------------------------------------------------------------------------------------------------------------------------------------------------------------------------------------------------------------------------------------------------------------------------------------------------------------------------------------------------------------------------------------------------------------------------------------------------------------------------------------------------------------------------------------------------------------------------------------------------------------------------------------------------------------------------------------------------------------------------------------------------------------------------------------------------------------------------------------------------------------|
| AFOS                 | NIH research grants: R01 AG18728, R01HL088119, R01AR046838, U01 HL084756, P30DK072488, T32AG000262 and F32AR059469. The Old Order Amish Study was supported by NIH research grants, R01 AG18728, R01HL088119, R01AR046838, U01 HL084756. Partial funding was also provided by the Nutrition and Obesity Research Center of Maryland (P30DK072488). LMY-A was supported by NIH training grants T32AG000262 and F32AR059469.                                                                                                                                                                                                                                                                                                                                                                                                                                                                                                                                                                                                                                                                                                                                                                                                                                                                                                                                                                                                                                                                                                                                                                                                                                                                                                                                                                                                                                                                                                                                                                                                                                                                                                                                                                                                                                                                                                                                                                                                                                                                                                                                                                                                                                                                                  | NIH research grants: R01 AG18728, R01HL088119, R01AR046838, U01 HL084756, P30DK072488, T32AG000262 and F32AR059469.                                                                                                                                                                                                                                                                                                                                                                                                                                                                                                                                                                                                                                                                                                                                                                                                                                                                                                                                              |
| AGES Reykjavik Study | The Age, Gene/Environment Susceptibility Reykjavik Study has been funded by NIH contract N01-AG-12100, the NIA Intramural Research Program, Hjartavernd (the Icelandic Heart Association), and the Althingi (the Icelandic Parliament). The Fracture Registry is funded by the Icelandic Heart Association .                                                                                                                                                                                                                                                                                                                                                                                                                                                                                                                                                                                                                                                                                                                                                                                                                                                                                                                                                                                                                                                                                                                                                                                                                                                                                                                                                                                                                                                                                                                                                                                                                                                                                                                                                                                                                                                                                                                                                                                                                                                                                                                                                                                                                                                                                                                                                                                                | NIH contract N01-AG-12100, the NIA Intramural Research Program, Hjartavernd (the Icelandic Heart Association), and the Althingi (the Icelandic Parliament). Icelandic Heart Association .                                                                                                                                                                                                                                                                                                                                                                                                                                                                                                                                                                                                                                                                                                                                                                                                                                                                        |
| AOGC                 | We would like to thank all participants who provided DNA and clinical information for the AOGC. The AOGC was funded by the Australian National Health and Medical Research Council (Australia) (grant reference 511132). Funding was also received from the Australian Cancer Research Foundation and Rebecca Cooper Foundation (Australia). MAB is funded by a National Health and Medical Research Council (Australia) Principal Research Fellowship and ELD is funded by a National Health and Medical Research Council (Australia) Career Development Award (569807). DME is supported by a Medical Research Council New Investigator Award (MRC G0800582) and JPK is funded by a Wellcome Trust PhD studentship (WT083431MA). IR is supported by the Health Research Council of New Zealand. The Sydney Twin Study and Tasmanian Older Adult Cohort were supported by the National Health and Medical Research Council, Australia. The help of Dr Joanna Makovey from the Sydney Twin Study is gratefully acknowledged. The Dubbo Osteoporosis Epidemiology Study was supported by the Australian National Health and Medical Research Council, MBF Living Well foundation, the Ernst Heine Family Foundation and from untied educational grants from Amgen, Eli Lilly International, GE-Lunar, Merck Australia, Novartis, Sanofi-Aventis Australia and Servier. The contribution from A/Prof Jacqueline R Center, A/Prof Tuan V Nguyen, Mr Sing C Nguyen, Ms Denia Mang, and Ms Ruth Toppler is gratefully acknowledged. The OPUS study was supported by Sanofi-Aventis, Eli Lilly, Novartis, Pfizer, Proctor&Gamble Pharmaceuticals and Roche. We thank the co-principal investigators from OPUS (Dr Christian Roux, Dr David Reid, Dr Claus Glier, and Dr Dieter Felsenber); Ms Judith Finigan and Ms Selina Simpson. The assistance of Ms Fatma Gossiel (Sheffield) is gratefully acknowledged. The Hertfordshire Cohort Study was supported by grants from the Medical research Council UK & Arthritis Research UK. We thank the men and women who participated; Prof Cyrus Cooper; and the Hertfordshire GPs who supported the study. The Oxford Osteoporosis Study was funded by Action Research, UK. The AOGC thanks the research nurses involved in this study (Ms Barbara Mason and Ms Amanda Horne (Auckland), Ms Linda Bradbury and Ms Kate Lowings (Brisbane), Ms Katherine Kolk and Ms Rumbidzai Tichawangana (Geelong); Ms Helen Steane (Hobart); Ms Jemma Christie (Melbourne); and Ms Janelle Rampellini (Perth)). The AOGC also acknowledges gratefully technical support from Ms Kathryn Addison, Ms Marieke Brugmans, Ms Catherine Cremen, Ms Johanna Hadler, and Ms Karena Pryce. | National Health and Medical Research Council (Australia) (grant reference 511132) Australian Cancer Research Foundation and Rebecca Cooper Foundation (Australia). National Health and Medical Research Council (Australia). National Health and Medical Research Council (Australia) Career Development Award (569807). Medical Research Council New Investigator Award (MRC G0800582). Health Research Council of New Zealand. Sanofi-Aventis, Eli Lilly, Novartis, Pfizer, Proctor&Gamble Pharmaceuticals and Roche. Australian National Health and Medical Research Council, MBF Living Well foundation, the Ernst Heine Family Foundation and from untied educational grants from Amgen, Eli Lilly International, GE-Lunar, Merck Australia, Novartis, Sanofi-Aventis Australia and Servier. Medical research Council UK & Arthritis Research UK. The Victorian Health Promotion Foundation and the Geelong Region Medical Research Foundation, and the National Health and Medical Research Council, Australia (project grant 628582). Action Research UK. |
| APOSS                | We are extremely grateful for the hard work of the clinical research staff in the Musculoskeletal Research Programme and to all the women who kindly participated in the study. Sample collection and analysis was supported in part by grants from the European Commission (QLRT-2001-02629) and the UK Food Standards Agency.                                                                                                                                                                                                                                                                                                                                                                                                                                                                                                                                                                                                                                                                                                                                                                                                                                                                                                                                                                                                                                                                                                                                                                                                                                                                                                                                                                                                                                                                                                                                                                                                                                                                                                                                                                                                                                                                                                                                                                                                                                                                                                                                                                                                                                                                                                                                                                             | European Commission (QLRT-2001-02629) and the UK Food Standards Agency.                                                                                                                                                                                                                                                                                                                                                                                                                                                                                                                                                                                                                                                                                                                                                                                                                                                                                                                                                                                          |
| AROS                 | The authors are very grateful to the participants and staff from the AROS Study.                                                                                                                                                                                                                                                                                                                                                                                                                                                                                                                                                                                                                                                                                                                                                                                                                                                                                                                                                                                                                                                                                                                                                                                                                                                                                                                                                                                                                                                                                                                                                                                                                                                                                                                                                                                                                                                                                                                                                                                                                                                                                                                                                                                                                                                                                                                                                                                                                                                                                                                                                                                                                            |                                                                                                                                                                                                                                                                                                                                                                                                                                                                                                                                                                                                                                                                                                                                                                                                                                                                                                                                                                                                                                                                  |
| AUSTRIOS A and B     | The AUSTRIOS studies are supported by the Medical University Graz. We thank Wilfried Renner, Elisabeth Lerchbaum, Verena Schwetz, Natascha Schweighofer, Markus Gugatschka, Daniela Walter-Finell, Lisa Stach, Astrid Fahrleitner-Pammer, Harald Dobnig and their colleagues for their help in creating the AUSTRIOS replication cohort. The authors are very grateful to the participants of the AUSTRIOS cohorts and the staff from the Medical University Graz.                                                                                                                                                                                                                                                                                                                                                                                                                                                                                                                                                                                                                                                                                                                                                                                                                                                                                                                                                                                                                                                                                                                                                                                                                                                                                                                                                                                                                                                                                                                                                                                                                                                                                                                                                                                                                                                                                                                                                                                                                                                                                                                                                                                                                                          | BioPersMed (COMET K-project 825329), Austrian Federal Ministry of Transport, Innovation and Technology (BMVIT) and the Austrian Federal Ministry of Economics and Labour/the Federal Ministry of Economy, Family and Youth (BMWA/BMWFJ) and the Styrian Business Promotion Agency (SFG)                                                                                                                                                                                                                                                                                                                                                                                                                                                                                                                                                                                                                                                                                                                                                                          |
| BARCOS               | Red de Envejecimiento y fragilidad RETICEF , Instituto Carlos III. Spanish Ministry of Education and Science (SAF2010-15707). Catalan Government (2009SGR971, 2009SGR818).                                                                                                                                                                                                                                                                                                                                                                                                                                                                                                                                                                                                                                                                                                                                                                                                                                                                                                                                                                                                                                                                                                                                                                                                                                                                                                                                                                                                                                                                                                                                                                                                                                                                                                                                                                                                                                                                                                                                                                                                                                                                                                                                                                                                                                                                                                                                                                                                                                                                                                                                  | Red de Envejecimiento y fragilidad RETICEF , Instituto Carlos III. Spanish Ministry of Education and Science (SAF2010-15707). Catalan Government (2009SGR971, 2009SGR818).                                                                                                                                                                                                                                                                                                                                                                                                                                                                                                                                                                                                                                                                                                                                                                                                                                                                                       |
| Cabrio-C, Cabrio-CC  | Instituto de Salud Carlos III-Fondo de Investigaciones Sanitarias (PI 06/0034,PI08/0183).We acknowledge the inputs and help of Dr. J.L. Hernández, C. Valero, D. Nan, J. Castillo and the staff of the Centro de Salud Jose Barros. We also thank the technical assistance of C. Sañudo, J. Arozamena, V. Mijares and B. Paule.                                                                                                                                                                                                                                                                                                                                                                                                                                                                                                                                                                                                                                                                                                                                                                                                                                                                                                                                                                                                                                                                                                                                                                                                                                                                                                                                                                                                                                                                                                                                                                                                                                                                                                                                                                                                                                                                                                                                                                                                                                                                                                                                                                                                                                                                                                                                                                             | Instituto de Salud Carlos III-Fondo de Investigaciones Sanitarias (PI 06/0034,PI08/0183).                                                                                                                                                                                                                                                                                                                                                                                                                                                                                                                                                                                                                                                                                                                                                                                                                                                                                                                                                                        |
| CAIFOS               | This CAIFOS study was supported by the Healthway Health Promotion Foundation of Western Australia, Australasian Menopause Society and the Australian National Health and Medical Research Council Project Grants (254627, 303169 and 572604). The authors are grateful to participants of the CAIFOS Study.                                                                                                                                                                                                                                                                                                                                                                                                                                                                                                                                                                                                                                                                                                                                                                                                                                                                                                                                                                                                                                                                                                                                                                                                                                                                                                                                                                                                                                                                                                                                                                                                                                                                                                                                                                                                                                                                                                                                                                                                                                                                                                                                                                                                                                                                                                                                                                                                 | Healthway Health Promotion Foundation of Western Australia, Australasian Menopause Society and the Australian National Health and Medical Research Council Project Grants (254627, 303169 and 572604).                                                                                                                                                                                                                                                                                                                                                                                                                                                                                                                                                                                                                                                                                                                                                                                                                                                           |
| Calex-family         | Mr. Leitung Xu, Ms. Shumei Cheng                                                                                                                                                                                                                                                                                                                                                                                                                                                                                                                                                                                                                                                                                                                                                                                                                                                                                                                                                                                                                                                                                                                                                                                                                                                                                                                                                                                                                                                                                                                                                                                                                                                                                                                                                                                                                                                                                                                                                                                                                                                                                                                                                                                                                                                                                                                                                                                                                                                                                                                                                                                                                                                                            | Academy of Finland and Finnish Ministry of Education.                                                                                                                                                                                                                                                                                                                                                                                                                                                                                                                                                                                                                                                                                                                                                                                                                                                                                                                                                                                                            |
| CaMos                | We thank all those participants in CaMos whose careful responses and attendance made this analysis possible. We also acknowledge the contributions of the centre directors and staff who have collected the DNA samples and phenotypic information. Canadian Institutes of Health Research (CIHR); Merck Frosst Canada Ltd.; Eli Lilly Canada Inc.; Novartis Pharmaceuticals Inc.; The Alliance: sanofi-aventis & Procter and Gamble Pharmaceuticals Canada Inc.; Servier Canada Inc.; Amgen Canada Inc.; The Dairy Farmers of Canada; and The Arthritis Society.                                                                                                                                                                                                                                                                                                                                                                                                                                                                                                                                                                                                                                                                                                                                                                                                                                                                                                                                                                                                                                                                                                                                                                                                                                                                                                                                                                                                                                                                                                                                                                                                                                                                                                                                                                                                                                                                                                                                                                                                                                                                                                                                           | Canadian Institutes of Health Research (CIHR); Merck Frosst Canada Ltd.; Eli Lilly Canada Inc.; Novartis Pharmaceuticals Inc.; The Alliance: sanofi-aventis & Procter and Gamble Pharmaceuticals Canada Inc.; Servier Canada Inc.; Amgen Canada Inc.; The Dairy Farmers of Canada; and The Arthritis Society.                                                                                                                                                                                                                                                                                                                                                                                                                                                                                                                                                                                                                                                                                                                                                    |
| CHS                  | Cardiovascular Health Study: This CHS research was supported by NHLBI contracts N01-HC-85239, N01-HC-85079 through N01-HC-85086; N01-HC-35129, N01 HC-15103, N01 HC-55222, N01-HC-75150, N01-HC-45133 and NHLBI grants HL080295, HL075366, HL087652, HL105756 with additional contribution from NINDS. Additional support was provided through AG-023629, AG-15928, AG-20098, and AG-027058 from the NIA. See also <a href="http://www.chs-nhlbi.org/pi.htm">http://www.chs-nhlbi.org/pi.htm</a> . DNA handling and genotyping was supported in part by National Center for Research Resources grant M01-RR00425 to the Cedars-Sinai General Clinical Research Center Genotyping core and National Institute of Diabetes and Digestive and Kidney Diseases grant DK063491 to the Southern California Diabetes Endocrinology Research Center. Cedars-Sinai Board of Governors' Chair in Medical Genetics (JIR);                                                                                                                                                                                                                                                                                                                                                                                                                                                                                                                                                                                                                                                                                                                                                                                                                                                                                                                                                                                                                                                                                                                                                                                                                                                                                                                                                                                                                                                                                                                                                                                                                                                                                                                                                                                              | NHLBI contracts N01-HC-85239, N01-HC-85079 through N01-HC-85086; N01-HC-35129, N01 HC-15103, N01 HC-55222, N01-HC-75150, N01-HC-45133 and NHLBI grants HL080295, HL075366, HL087652, HL105756 NINDS. Additional support was provided through AG-023629, AG-15928, AG-20098, and AG-027058 from the NIA. National Center for Research Resources grant M01-RR00425 to the Cedars-Sinai General Clinical Research Center Genotyping core and National Institute of Diabetes and Digestive and Kidney Diseases grant DK063491 to the Southern California Diabetes Endocrinology Research Center.                                                                                                                                                                                                                                                                                                                                                                                                                                                                     |
| deCODE               | Funded by deCODE Genetics. We wish to thank the study volunteers for their contributions to this project, and the staff at the deCODE core facilities.                                                                                                                                                                                                                                                                                                                                                                                                                                                                                                                                                                                                                                                                                                                                                                                                                                                                                                                                                                                                                                                                                                                                                                                                                                                                                                                                                                                                                                                                                                                                                                                                                                                                                                                                                                                                                                                                                                                                                                                                                                                                                                                                                                                                                                                                                                                                                                                                                                                                                                                                                      | deCODE Genetics                                                                                                                                                                                                                                                                                                                                                                                                                                                                                                                                                                                                                                                                                                                                                                                                                                                                                                                                                                                                                                                  |
| DOPS                 | The authors are very grateful to the participants and staff from the DOPS study. We would like to thank Prof. Leif Mosekilde, Prof. Kim Brixen, Dr. Jens-Erik Beck Jensen and Dr. Pia Eiken as well as their institutions.                                                                                                                                                                                                                                                                                                                                                                                                                                                                                                                                                                                                                                                                                                                                                                                                                                                                                                                                                                                                                                                                                                                                                                                                                                                                                                                                                                                                                                                                                                                                                                                                                                                                                                                                                                                                                                                                                                                                                                                                                                                                                                                                                                                                                                                                                                                                                                                                                                                                                  |                                                                                                                                                                                                                                                                                                                                                                                                                                                                                                                                                                                                                                                                                                                                                                                                                                                                                                                                                                                                                                                                  |
| EDOS                 | The EDOS study was supported by a grant from Arthritis Research UK (grant number 15389).                                                                                                                                                                                                                                                                                                                                                                                                                                                                                                                                                                                                                                                                                                                                                                                                                                                                                                                                                                                                                                                                                                                                                                                                                                                                                                                                                                                                                                                                                                                                                                                                                                                                                                                                                                                                                                                                                                                                                                                                                                                                                                                                                                                                                                                                                                                                                                                                                                                                                                                                                                                                                    | Arthritis Research UK (grant number 15389).                                                                                                                                                                                                                                                                                                                                                                                                                                                                                                                                                                                                                                                                                                                                                                                                                                                                                                                                                                                                                      |
| EPIC-Norfolk         | The UK's NIMR Biomedical Research Centre Grant to Cambridge contributed to the costs of genotyping. EPIC-Norfolk is funded by Cancer Research Campaign; Medical Research Council; Stroke Association; British Heart Foundation; Department of Health; Europe Against Cancer Programme Commission of the European Union and the Ministry of Agriculture, Fisheries and Food. The funders had no role in study design, data collection and analysis, decision to publish, or preparation of the manuscript. EPIC-Norfolk is funded by Cancer Research Campaign; Medical Research Council; Stroke Association; British Heart Foundation; Department of Health; Europe Against Cancer Programme Commission of the European Union and the Ministry of Agriculture, Fisheries and Food. The UK's NIMR Biomedical Research Centre Grant to Cambridge contributed to the costs of genotyping. We thank in particular Mrs N Dalzell for coordination and DXA data collection, Robert Luben for data management, Serena Scollen and Alison Dunning for genotyping in GENOMOS, and Matt Sims and Steve Knighton for managing the EPIC DNA bank.                                                                                                                                                                                                                                                                                                                                                                                                                                                                                                                                                                                                                                                                                                                                                                                                                                                                                                                                                                                                                                                                                                                                                                                                                                                                                                                                                                                                                                                                                                                                                                        | The UK's NIMR Biomedical Research Centre Grant. Cancer Research Campaign; Medical Research Council; Stroke Association; British Heart Foundation; Department of Health; Europe Against Cancer Programme Commission of the European Union and the Ministry of Agriculture, Fisheries and Food.                                                                                                                                                                                                                                                                                                                                                                                                                                                                                                                                                                                                                                                                                                                                                                    |

| Cohort                                                       | Full Acknowledgments                                                                                                                                                                                                                                                                                                                                                                                                                                                                                                                                                                                                                                                                                                                                                                                                                                                                                                                                                                                                                                                                                                                                                                                                                                                                                   | ACKNOWLEDGMENTS (funding agencies)                                                                                                                                                                                                                                                                                                                                                                              |
|--------------------------------------------------------------|--------------------------------------------------------------------------------------------------------------------------------------------------------------------------------------------------------------------------------------------------------------------------------------------------------------------------------------------------------------------------------------------------------------------------------------------------------------------------------------------------------------------------------------------------------------------------------------------------------------------------------------------------------------------------------------------------------------------------------------------------------------------------------------------------------------------------------------------------------------------------------------------------------------------------------------------------------------------------------------------------------------------------------------------------------------------------------------------------------------------------------------------------------------------------------------------------------------------------------------------------------------------------------------------------------|-----------------------------------------------------------------------------------------------------------------------------------------------------------------------------------------------------------------------------------------------------------------------------------------------------------------------------------------------------------------------------------------------------------------|
| EPOS                                                         | EU Biomed 1 (BMHICT920182, CIPDCT925012, ERBC1PDCT 940229, ERBC1PDCT930105), Medical Research Council G9321536 and G9800062, Wellcome Trust collaborative Research Initiative 1995, MAFF AN0523, EU FP5 (QLK6-CT-2002-02629), Food Standards Agency N05046, GEFOS EU FP7 Integrated Project Grant Reference: 201865 The UK's NIMR Biomedical Research Centre Grant to Cambridge contributed to the costs of genotyping. The European Prospective Osteoporosis Study (1992-) was the prospective phase of the European Vertebral Osteoporosis Study, initiated by Alan J Silman who continued as the joint coordinator of EPOS. Particular thank are due to Terry O'Neill, Mark Lunt and Joe Finn for managing the collection of phenotypic data in Manchester and Jon Power for lab support. The PIs of the EPOS Centres contributing to the GENOMOS initiative and their excellent and enthusiastic staff are thanked for their energetic contributions to local fund-raising and excellent data collection efforts as well as collecting blood for DNA from their subjects: J Bruges Armas, A Bhalla, G Poor, R Nuti, A Lopes Vaz, L Benevolenskaya, S Grazio, K Weber, T Miazgowski, J J Stepan, J da Silva, P Masaryk, F Galan Galan, S Boonen, S Havelka, G Iyritsis, M Naves Diaz, R Perez Cano. | EU Biomed 1 (BMHICT920182, CIPDCT925012, ERBC1PDCT 940229, ERBC1PDCT930105), Medical Research Council G9321536 and G9800062, Wellcome Trust collaborative Research Initiative 1995, MAFF AN0523, EU FP5 (QLK6-CT-2002-02629), Food Standards Agency N05046, GEFOS EU FP7 Integrated Project Grant Reference: 201865 The UK's NIMR Biomedical Research Centre Grant to Cambridge.                                |
| ERF                                                          | The ERF study was supported by grants from the Netherlands Organisation for Scientific Research (NWO), Erasmus university medical center, the Centre for Medical Systems Biology (CMSB1 and CMSB2) of the Netherlands Genomics Initiative (NGI). We are grateful to all individuals and their relatives and general practitioners for their contributions and Jeannette Vergeer for the supervision of the laboratory work.                                                                                                                                                                                                                                                                                                                                                                                                                                                                                                                                                                                                                                                                                                                                                                                                                                                                            | Netherlands Organisation for Scientific Research (NWO), Erasmus university medical center, the Centre for Medical Systems Biology (CMSB1 and CMSB2) of the Netherlands Genomics Initiative (NGI).                                                                                                                                                                                                               |
| FLOS                                                         | F.I.R.M.O. Fondazione Raffaella Becagli.                                                                                                                                                                                                                                                                                                                                                                                                                                                                                                                                                                                                                                                                                                                                                                                                                                                                                                                                                                                                                                                                                                                                                                                                                                                               | F.I.R.M.O. Fondazione Raffaella Becagli.                                                                                                                                                                                                                                                                                                                                                                        |
| Framingham Study Original Cohort, Framingham Offspring Study | The study was funded by grants from the US National Institute for Arthritis, Musculoskeletal and Skin Diseases and National Institute on Aging (R01 AR/AG 41398; DPK and R01 AR 050066; DK). The Framingham Heart Study of the National Heart, Lung, and Blood Institute of the National Institutes of Health and Boston University School of Medicine were supported by the National Heart, Lung, and Blood Institute's Framingham Heart Study (N01-HC-25195) and its contract with Affymetrix, Inc. for genotyping services (N02-HL-6-4278). Analyses reflect intellectual input and resource development from the Framingham Heart Study investigators participating in the SNP Health Association Resource (SHARe) project. A portion of this research was conducted using the Linux Cluster for Genetic Analysis (LinGA-II) funded by the Robert Dawson Evans Endowment of the Department of Medicine at Boston University School of Medicine and Boston Medical Center.                                                                                                                                                                                                                                                                                                                          | National Institute for Arthritis, Musculoskeletal and Skin Diseases and National Institute on Aging (R01 AR/AG 41398; DPK and R01 AR 050066; DK National Heart, Lung, and Blood Institute's Framingham Heart Study (N01-HC-25195) and its contract with Affymetrix, Inc. for genotyping services (N02-HL-6-4278).                                                                                               |
| GEOS                                                         | Financial support was provided by the Canadian Institutes for Health Research (Funding reference #86748). Infrastructure support to the various research centers was provided by the Fonds de Recherche en Santé du Québec. François Rousseau holds a Fonds de la Recherche en Santé du Québec / MSSS Research Chair in Health Technology Assessment and Evidence Based Laboratory Medicine. We thank Cynthia Roy and Johanne Bussières for technical assistance.                                                                                                                                                                                                                                                                                                                                                                                                                                                                                                                                                                                                                                                                                                                                                                                                                                      | Canadian Institutes for health research operating grant funding reference #86748.                                                                                                                                                                                                                                                                                                                               |
| GEVUR                                                        | Federal program of Ministry of Education and Science of Russian Federation "Scientific and pedagogical staff of innovative Russia" in 2009-2013 (state contract P-601) and Federal program "Research and development of prior directions of scientific-technological complex of Russia in 2007-2012" (state contract 16.512.11.2032). This work was supported by the Federal program of Ministry of Education and Science of Russian Federation "Scientific and pedagogical staff of innovative Russia" in 2009-2013 (state contract P-601) and Federal program "Research and development of prior directions of scientific-technological complex of Russia in 2007-2012" (state contract 16.512.11.2032). We are grateful to prof. Lesnyak O.M., the Head of Family Medicine Department of Ural State Medical Academy, Dr. Kojhemyakina Elena and Evstegneeva Ludmila for their help in collecting blood samples.                                                                                                                                                                                                                                                                                                                                                                                     | Federal program of Ministry of Education and Science of Russian Federation "Scientific and pedagogical staff of innovative Russia" in 2009-2013 (state contract P-601) and Federal program "Research and development of prior directions of scientific-technological complex of Russia in 2007-2012" (state contract 16.512.11.2032).                                                                           |
| GOOD                                                         | Financial support was received from the Swedish Research Council (K2010-54X-09894-19-3, 2006-3832 and K2010-52X-20229-05-3), the Swedish Foundation for Strategic Research, the ALF/LUA research grant in Gothenburg, the Lundberg Foundation, the Torsten and Ragnar Söderberg's Foundation, the Västra Götaland Foundation, the Göteborg Medical Society, the Novo Nordisk foundation, and the European Commission grant HEALTH-F2-2008-201865-GEFOS. We would like to acknowledge Maria Nethander at the genomics core facility at University of Gothenburg for statistical analyses. We would also like to thank Dr. Tobias A. Knoch, Luc V. de Zeeuw, Anis Abuseiris, and Rob de Graaf as well as their institutions the Erasmus Computing Grid, Rotterdam, The Netherlands, and especially the national German MediGRID and Services@MediGRID part of the German D-Grid, both funded by the German Bundesministerium fuer Forschung und Technology under grants #01 AK 803 A-H and # 01 IG 07015 G for access to their grid resources. We would also like to thank Karol Estrada, Department of Internal Medicine, Erasmus MC, Rotterdam, Netherlands for advice regarding the grid resources.                                                                                                   | Swedish Research Council (K2010-54X-09894-19-3, 2006-3832 and K2010-52X-20229-05-3), the Swedish Foundation for Strategic Research, the ALF/LUA research grant in Gothenburg, the Lundberg Foundation, the Torsten and Ragnar Söderberg's Foundation, the Västra Götaland Foundation, the Göteborg Medical Society, the Novo Nordisk foundation, and the European Commission grant HEALTH-F2-2008-201865-GEFOS. |
| GROS                                                         | The GROS study was supported partially by a research grant (Kapodistrias 2009, University of Athens, Greece). The authors are very grateful to Assoc. Prof. P. Georgoulas, the head of Nuclear Medicine Department, for bone markers analysis. We would like to thank the participants and staff from the Department of Orthopaedics, University Hospital of Thessalia, Larissa, Greece, as well as Mrs. S. Samara, Mr. C. Chassanidis and Mrs. C. Paliou for their help in collecting blood samples.                                                                                                                                                                                                                                                                                                                                                                                                                                                                                                                                                                                                                                                                                                                                                                                                  | University of Athens, Greece (Kapodistrias 2009).                                                                                                                                                                                                                                                                                                                                                               |
| HCS                                                          | Medical Research Council; Arthritis Research UK; NIHR Musculoskeletal BRU Oxford; NIHR Nutrition BRU Southampton.                                                                                                                                                                                                                                                                                                                                                                                                                                                                                                                                                                                                                                                                                                                                                                                                                                                                                                                                                                                                                                                                                                                                                                                      | Medical Research Council; Arthritis Research UK; NIHR Musculoskeletal BRU Oxford; NIHR Nutrition BRU Southampton.                                                                                                                                                                                                                                                                                               |
| HealthABC                                                    | This research was supported in part by the Intramural Research Program of the NIH, National Institute on Aging. This research was supported by the U.S. National Institute of Aging (NIA) contracts N01AG62101, N01AG62103, and N01AG62106. The genome-wide association study was funded by NIA grant 1R01AG032098 to Wake Forest University Health Sciences and genotyping services were provided by the Center for Inherited Disease Research (CIDR). CIDR is fully funded through a federal contract from the National Institutes of Health to The Johns Hopkins University, contract number HHSN268200782096C. We would like to thank the participants of the Health, Aging, and Body Composition Study.                                                                                                                                                                                                                                                                                                                                                                                                                                                                                                                                                                                           | The Intramural Research Program of the NIH, National Institute on Aging, U.S. National Institute of Aging (NIA) contracts N01AG62101, N01AG62103, and N01AG62106. NIA grant 1R01AG032098. The Center for Inherited Disease Research (CIDR). National Institutes of Health contract number HHSN268200782096C.                                                                                                    |
| HKOS                                                         | This project is supported by Hong Kong Research Grant Council (HKU 768610M); The Bone Health Fund of HKU Foundation; The KC Wong Education Foundation; Small Project Funding (201007176237); Matching Grant, CRCG Grant and Osteoporosis and Endocrine Research Fund, and the Genomics Startegic Research Theme of The University of Hong Kong. The authors are very grateful to the participants and clinical staff at the Queen Mary Hospital of The University of Hong Kong.                                                                                                                                                                                                                                                                                                                                                                                                                                                                                                                                                                                                                                                                                                                                                                                                                        | Hong Kong Research Grant Council (HKU 768610M); The Bone Health Fund of HKU Foundation; The KC Wong Education Foundation; Small Project Funding (201007176237); Matching Grant, CRCG Grant and Osteoporosis and Endocrine Research Fund, and the Genomics Strategic Research Theme of The University of Hong Kong.                                                                                              |
| Hong Kong                                                    | Direct grant of the Chinese University of Hong Kong.                                                                                                                                                                                                                                                                                                                                                                                                                                                                                                                                                                                                                                                                                                                                                                                                                                                                                                                                                                                                                                                                                                                                                                                                                                                   | Direct grant of the Chinese University of Hong Kong.                                                                                                                                                                                                                                                                                                                                                            |
| Indiana                                                      | National Institutes of Health grants P01 AG-18397 and M01 RR-00750. Genotyping services were provided by CIDR. CIDR is fully funded through a federal contract from the National Institutes of Health to The Johns Hopkins University, contract number HHSN268200782096C. This research was supported in part by the Intramural Research Program of the NIH, National Library of Medicine. We thank the individuals who participated in this study, as well as the study coordinators, without whom this work would not have been possible. This work was supported by National Institutes of Health grants P01 AG-18397 and M01 RR-00750. Genotyping services were provided by CIDR. CIDR is fully funded through a federal contract from the National Institutes of Health to The Johns Hopkins University, contract number HHSN268200782096C. This research was supported in part by the Intramural Research Program of the NIH, National Library of Medicine.                                                                                                                                                                                                                                                                                                                                      | National Institutes of Health grants P01 AG-18397 and M01 RR-00750. Intramural Research Program of the NIH, National Library of Medicine.                                                                                                                                                                                                                                                                       |
| KorAMC                                                       | This work was supported by a grant of the Korea Health 21 R&D Project, Ministry of Health & Welfare, Republic of Korea (Project No.: A010252), and by a grant of the Korea Healthcare technology R&D Project, Ministry for Health, Welfare and Family Affairs (Project No.: A110536).                                                                                                                                                                                                                                                                                                                                                                                                                                                                                                                                                                                                                                                                                                                                                                                                                                                                                                                                                                                                                  | A grant of the Korea Health 21 R&D Project, Ministry of Health & Welfare, Republic of Korea (Project No.: A010252); A grant of the Korea Healthcare technology R&D Project, Ministry for Health, Welfare and Family Affairs (Project No.: A110536).                                                                                                                                                             |
| LASA                                                         | The Longitudinal Aging Study Amsterdam is largely supported by a grant from the Netherlands Ministry of Health Welfare and Sports, Directorate of Long-Term Care.                                                                                                                                                                                                                                                                                                                                                                                                                                                                                                                                                                                                                                                                                                                                                                                                                                                                                                                                                                                                                                                                                                                                      | Grant from the Netherlands Ministry of Health Welfare and Sports, Directorate of Long-Term Care.                                                                                                                                                                                                                                                                                                                |

| Cohort                                        | Full Acknowledgments                                                                                                                                                                                                                                                                                                                                                                                                                                                                                                                                                                                                                                                                                                                                                                                                                                                                                                                                                                                                                                                                                                                                                                                                                                                                                                                                                                                                                                                                                                                                                                                                                                                                   | ACKNOWLEDGMENTS (funding agencies)                                                                                                                                                                                                                                                                                                                                                                                                           |
|-----------------------------------------------|----------------------------------------------------------------------------------------------------------------------------------------------------------------------------------------------------------------------------------------------------------------------------------------------------------------------------------------------------------------------------------------------------------------------------------------------------------------------------------------------------------------------------------------------------------------------------------------------------------------------------------------------------------------------------------------------------------------------------------------------------------------------------------------------------------------------------------------------------------------------------------------------------------------------------------------------------------------------------------------------------------------------------------------------------------------------------------------------------------------------------------------------------------------------------------------------------------------------------------------------------------------------------------------------------------------------------------------------------------------------------------------------------------------------------------------------------------------------------------------------------------------------------------------------------------------------------------------------------------------------------------------------------------------------------------------|----------------------------------------------------------------------------------------------------------------------------------------------------------------------------------------------------------------------------------------------------------------------------------------------------------------------------------------------------------------------------------------------------------------------------------------------|
| <b>ManMC (Manitoba McGill Fracture Study)</b> | The authors are indebted to Manitoba Health for the provision of data (HIPCC File No. 2008/2009-12). The results and conclusions are those of the authors, and no official endorsement by Manitoba Health is intended or should be inferred. The authors would also like to thank Ms. Linda Ward for coordinating recruitment activities related to the Manitoba Cohort and Ms Anna Kelly Sampson for coordinating the study from Montreal. In addition we thank Renee Atallah for her efforts with data entry. Study funded by Canadian Foundation for Innovation, the Canadian Institutes of Health Research (CIHR), Fonds de la recherche en santé du Québec and the Jewish General Hospital, Montreal, Canada.                                                                                                                                                                                                                                                                                                                                                                                                                                                                                                                                                                                                                                                                                                                                                                                                                                                                                                                                                                     | Canadian Foundation for Innovation, the Canadian Institutes of Health Research (CIHR), Fonds de la recherche en santé du Québec and the Jewish General Hospital Montreal, Canada.                                                                                                                                                                                                                                                            |
| <b>MrOS Sweden</b>                            | Financial support was received from the Swedish Research Council (K2010-54X-09894-19-3, 2006-3832), the Swedish Foundation for Strategic Research, the ALF/LUA research grant in Gothenburg, the Lundberg Foundation, the Torsten and Ragnar Söderberg's Foundation, the Västra Götaland Foundation, the Göteborg Medical Society, the Novo Nordisk foundation and the European Commission grant HEALTH-F2-2008-201865-GEFOS.                                                                                                                                                                                                                                                                                                                                                                                                                                                                                                                                                                                                                                                                                                                                                                                                                                                                                                                                                                                                                                                                                                                                                                                                                                                          | Swedish Research Council (K2010-54X-09894-19-3, 2006-3832), the Swedish Foundation for Strategic Research, the ALF/LUA research grant in Gothenburg, the Lundberg Foundation, the Torsten and Ragnar Söderberg's Foundation, the Västra Götaland Foundation, the Göteborg Medical Society, the Novo Nordisk foundation and the European Commission grant HEALTH-F2-2008-201865-GEFOS.                                                        |
| <b>NOSOS</b>                                  | We are grateful to everyone who helped with NOSOS study recruitment, data and sample collection (radiographers, research nurses, administration staff, clinicians, technicians and research assistants) at both the Aberdeen and Dingwall centres, as well as Dr Malcolm Steven, who assisted with original participant access at the Dingwall centre. Finally, we are extremely grateful to all the women who took part in this study.                                                                                                                                                                                                                                                                                                                                                                                                                                                                                                                                                                                                                                                                                                                                                                                                                                                                                                                                                                                                                                                                                                                                                                                                                                                |                                                                                                                                                                                                                                                                                                                                                                                                                                              |
| <b>OAS</b>                                    | Eveline Boudin is thanked for managing DNA samples and the World Anti-Doping Agency, the Danish Ministry of Culture, and Institute of Clinical Research of the University of Southern Denmark are thanked for financial support.                                                                                                                                                                                                                                                                                                                                                                                                                                                                                                                                                                                                                                                                                                                                                                                                                                                                                                                                                                                                                                                                                                                                                                                                                                                                                                                                                                                                                                                       | World Anti-Doping Agency, the Danish Ministry of Culture, Institute of Clinical Research of the University of Southern Denmark.                                                                                                                                                                                                                                                                                                              |
| <b>ORCADES</b>                                | ORCADES was supported by grants from the Chief Scientist Office of the Scottish Government, the Royal Society, Arthritis Research UK (grant number 17539) and the European Union framework program 6 EUROSAN project (contract no. LSHG-CT-2006-018947). DNA extractions were performed at the Wellcome Trust Clinical Research Facility in Edinburgh. We would like to acknowledge the invaluable contributions of Lorraine Anderson and the research nurses in Orkney, the administrative team in Edinburgh and the people of Orkney.                                                                                                                                                                                                                                                                                                                                                                                                                                                                                                                                                                                                                                                                                                                                                                                                                                                                                                                                                                                                                                                                                                                                                | Chief Scientist Office of the Scottish Government, the Royal Society, Arthritis Research UK (grant number 17539) and the European Union Framework program 6 EUROSAN project (contract no. LSHG-CT-2006-018947).                                                                                                                                                                                                                              |
| <b>OSTEOS</b>                                 | We thank all participants for given their consent to the study                                                                                                                                                                                                                                                                                                                                                                                                                                                                                                                                                                                                                                                                                                                                                                                                                                                                                                                                                                                                                                                                                                                                                                                                                                                                                                                                                                                                                                                                                                                                                                                                                         |                                                                                                                                                                                                                                                                                                                                                                                                                                              |
| <b>PROSPER/PHASE study</b>                    | The research leading to these results has received funding from the European Union's Seventh Framework Programme (FP7/2007-2013) under grant agreement n° HEALTH-F2-2009-223004 PHASE.                                                                                                                                                                                                                                                                                                                                                                                                                                                                                                                                                                                                                                                                                                                                                                                                                                                                                                                                                                                                                                                                                                                                                                                                                                                                                                                                                                                                                                                                                                 | European Union's Seventh Framework Programme (FP7/2007-2013) under grant agreement n° HEALTH-F2-2009-223004 PHASE.                                                                                                                                                                                                                                                                                                                           |
| <b>RSI,RSII,RSIII</b>                         | The GWA study was funded by the Netherlands Organisation of Scientific Research NWO Investments (nr. 175.010.2005.011, 911-03-012), the Research Institute for Diseases in the Elderly (014-93-015; RIDE2), the Netherlands Genomics Initiative (NGI)/Netherlands Consortium for Healthy Aging (NCHA) project nr. 050-060-810. We thank Pascal Arp, Mila Jhamai, Dr Michael Moorhouse, Marijn Verkerk, and Lisbeth Herrera for their help in creating the GWAS database. We also thank Lisette Stolk for her support creating the fracture dataset and members of the GIANT consortium for sharing scripts used in this study. The Rotterdam Study is funded by Erasmus Medical Center and Erasmus University, Rotterdam, Netherlands Organization for the Health Research and Development (ZonMw), the Research Institute for Diseases in the Elderly (RIDE), the Ministry of Education, Culture and Science, the Ministry for Health, Welfare and Sports, the European Commission (DG XII), and the Municipality of Rotterdam. The authors are very grateful to the participants and staff from the Rotterdam Study, particularly L. Buist and J.H. van den Boogert and also the participating general practitioners and pharmacists. We would like to thank Dr. Tobias A. Knoch, Luc V. de Zeeuw, Anis Abuseiris, and Rob de Graaf as well as their institutions the Erasmus Computing Grid, Rotterdam, The Netherlands, and especially the national German MediGRID and Services@MediGRID part of the German D-Grid, both funded by the German Bundesministerium fuer Forschung und Technology under grants #01 AK 803 A-H and # 01 IG 07015 G for access to their grid resources. | Netherlands Organisation of Scientific Research NWO Investments (nr. 175.010.2005.011, 911-03-012); Research Institute for Diseases in the Elderly (014-93-015; RIDE2); Netherlands Genomics Initiative/Netherlands Consortium for Healthy Aging (050-060-810); German Bundesministerium fuer Forschung und Technology under grants #01 AK 803 A-H and # 01 IG 07015 G;                                                                      |
| <b>TUK1, TUK23</b>                            | NIHR Biomedical Research Centre (grant to Guys' and St. Thomas' Hospitals and King's College London); the Chronic Disease Research Foundation; Canadian Institutes of Health Research, the Canadian Foundation for Innovation, the Fonds de la Recherche en Santé Québec, The Lady Davis Institute, the Jewish General Hospital and Ministère du Développement économique, de l'Innovation et de l'Exportation du Québec. Dr. Frances Williams for her contributions to phenotyping in this cohort.                                                                                                                                                                                                                                                                                                                                                                                                                                                                                                                                                                                                                                                                                                                                                                                                                                                                                                                                                                                                                                                                                                                                                                                    | NIHR Biomedical Research Centre (grant to Guys' and St. Thomas' Hospitals and King's College London); the Chronic Disease Research Foundation; Wellcome Trust Canadian Institutes of Health Research, the Canadian Foundation for Innovation, the Fonds de la Recherche en Santé Québec, The Lady Davis Institute, the Jewish General Hospital and Ministère du Développement économique, de l'Innovation et de l'Exportation du Québec.     |
| <b>UFO</b>                                    | The Umeå Fracture and Osteoporosis Study (UFO) is supported by the Swedish Research Council (K20006-72X-20155013), the Swedish Sports Research Council (87/06), the Swedish Society of Medicine, the Kempe-Foundation (JCK-1021), and by grants from the Medical Faculty of Umeå University (ALFVLL:968:22-2005, ALFVLL:937-2006, ALFVLL:223:11-2007, ALFVLL:78151-2009) and from the county council of Västerbotten (Spjutspetsanslag VLL:159:33-2007). We thank Åsa Ågren, Hubert Sjödin and Magnus Hellström for skulfull data processing and for help creating the UFO database and Kerstin Enquist and Ann-Marie Åhrén for their help in preparing samples for genotyping. We would also like to thank the participants and staff from the NSHDS cohort study and all collaborators in the UFO study group.                                                                                                                                                                                                                                                                                                                                                                                                                                                                                                                                                                                                                                                                                                                                                                                                                                                                       | Swedish Research Council (K20006-72X-20155013), the Swedish Sports Research Council (87/06), the Swedish Society of Medicine, the Kempe-Foundation (JCK-1021), and by grants from the Medical Faculty of Umeå University (ALFVLL:968:22-2005, ALFVLL:937-2006, ALFVLL:223:11-2007, ALFVLL:78151-2009) and from the county council of Västerbotten (Spjutspetsanslag VLL:159:33-2007)                                                         |
| <b>WGHS</b>                                   | The WGHS is supported by HL 043851 and HL69757 from the National Heart, Lung, and Blood Institute and CA 047988 from the National Cancer Institute, the Donald W. Reynolds Foundation and the Fondation Leducq, with collaborative scientific support and funding for genotyping provided by Amgen.                                                                                                                                                                                                                                                                                                                                                                                                                                                                                                                                                                                                                                                                                                                                                                                                                                                                                                                                                                                                                                                                                                                                                                                                                                                                                                                                                                                    | HL 043851 and HL69757 from the National Heart, Lung, and Blood Institute and CA 047988 from the National Cancer Institute, the Donald W. Reynolds Foundation and the Fondation Leducq, Amgen.                                                                                                                                                                                                                                                |
| <b>Young Finns study (YFS)</b>                | The Young Finns Study has been financially supported by the Academy of Finland: grants 126925, 121584, 124282, 129378 (Salve), 117787 (Gendi), and 41071 (Skidi), the Social Insurance Institution of Finland, Kuopio, Tampere and Turku University Hospital Medical Funds (grant 9M048 for TeLeht), Juho Vainio Foundation, Paavo Nurmi Foundation, Finnish Foundation of Cardiovascular Research and Finnish Cultural Foundation, Tampere Tuberculosis Foundation and Emil Aaltonen Foundation (T.L.).The expert technical assistance in the statistical analyses by Irina Lisenin is gratefully acknowledged.                                                                                                                                                                                                                                                                                                                                                                                                                                                                                                                                                                                                                                                                                                                                                                                                                                                                                                                                                                                                                                                                       | Academy of Finland: grants 126925, 121584, 124282, 129378 (Salve), 117787 (Gendi), and 41071 (Skidi), the Social Insurance Institution of Finland, Kuopio, Tampere and Turku University Hospital Medical Funds (grant 9M048 for TeLeht), Juho Vainio Foundation, Paavo Nurmi Foundation, Finnish Foundation of Cardiovascular Research and Finnish Cultural Foundation, Tampere Tuberculosis Foundation and Emil Aaltonen Foundation (T.L.). |
